# Supplementary material for: Modular Two‐Step Access to π‐Extended Naphthyridine Systems—Potent Building Blocks for Organic Electronics
Source: PubMed Central journal article supplement — Angew Chem Int Ed Engl. 2021 Dec 10;61(4):e202114277. doi: 10.1002/anie.202114277 (PMC9299885; doi:10.1002/anie.202114277), 2021-12-10
Supplement: ANIE-61-0-s001.pdf [file ANIE-61-0-s001.pdf]

Supporting Information

**Modular Two-Step Access to  $\pi$ -Extended Naphthyridine Systems—  
Potent Building Blocks for Organic Electronics**

*Fabian Stuck, Martin C. Dietl, Maximilian Meißner, Finn Sebastian, Matthias Rudolph,  
Frank Rominger, Petra Krämer, and A. Stephen. K. Hashmi\**

anie\_202114277\_sm\_miscellaneous\_information.pdf

**Table of content**

|                                                                                          |     |
|------------------------------------------------------------------------------------------|-----|
| 1. Experimental Procedures.....                                                          | 3   |
| 1.1. General Information.....                                                            | 3   |
| 1.2. Synthesis of Ynamides.....                                                          | 3   |
| 1.2.1. Synthesis of Ynamides 1a–b.....                                                   | 3   |
| 1.2.2. Synthesis of Ynamide 9.....                                                       | 7   |
| 1.3. Gold-catalysed synthesis of quinolines.....                                         | 12  |
| 1.3.1. General procedures for gold-catalysed synthesis of quinolines 4a-h and 10a-d..... | 12  |
| 1.3.2. Gold-catalysed synthesis of 4a-g.....                                             | 12  |
| 1.3.3. Gold-catalysed synthesis of quinolines 10a-d.....                                 | 16  |
| 1.3.4. Gold-catalysed synthesis of quinoline 4h.....                                     | 20  |
| 1.4. Synthesis of naphthyridine-based PAHs.....                                          | 21  |
| 1.4.1. General procedure for condensation to phenanthronaphthyridines.....               | 21  |
| 1.4.2. Synthesis of naphthyridines 5a-h.....                                             | 21  |
| 1.4.3. Synthesis of Dinaphthyridinopyrenes 11a-d.....                                    | 25  |
| 2. X-ray crystal structure and –packing of 5c.....                                       | 29  |
| 3. Cyclovoltammetry (CV) data of 5a-h.....                                               | 30  |
| 4. UV-Vis- and fluorescence spectra of 5a-h and 11a-d.....                               | 32  |
| 5. NMR spectra.....                                                                      | 35  |
| 5.1. NMR of ynamides and starting materials.....                                         | 35  |
| 5.2. NMR of Quinolines 4a-h and 10a-d.....                                               | 47  |
| 5.3. NMR of Naphthyridines 5a-h and 11c-d.....                                           | 59  |
| 6. X-ray crystal structures.....                                                         | 70  |
| 6.1. Compound 11d.....                                                                   | 70  |
| 6.2. Compound 5a.....                                                                    | 76  |
| 6.3. Compound 17.....                                                                    | 81  |
| 6.4. Compound 5c.....                                                                    | 84  |
| 6.5. Compound 5e.....                                                                    | 89  |
| 6.6. Compound 5h.....                                                                    | 108 |
| 7. Computational Data of 5a-h and 11a and 11b.....                                       | 112 |
| 8. References.....                                                                       | 123 |

## 1. Experimental Procedures

### 1.1. General Information

All commercially available chemicals were purchased from suppliers (ABCR, Acros, Alfa Aesar, Chempur, Merck and Sigma Aldrich) or obtained from the chemical store of the University of Heidelberg and were used without further purifications. Dry solvents were dispensed from solvent purification system MB SPS-800-Benchtop. Deuterated solvents were supplied from Euriso-Top and used as received. The NMR spectra, if not noted otherwise, were recorded at room temperature on the following spectrometers: Bruker Avance III 300 (300 MHz), Bruker Avance DRX 300 (300 MHz), Bruker Avance III 400 (400 MHz), Bruker Avance III 500 (500 MHz), Bruker Avance III 600 (600 MHz), Bruker Avance III (700 MHz) or Fourier 300 (300 MHz). Chemical shifts  $\delta$  are quoted in parts per million (ppm) and coupling constants  $J$  in Hertz (Hz).  $^1\text{H}$  and  $^{13}\text{C}$  spectra are calibrated in relation to the deuterated solvents, namely  $\text{CDCl}_3$  (7.26 ppm; 77.16 ppm).  $^{19}\text{F}$  spectra were calibrated in relation to the reference measurement of 1,2-difluorobenzene (-139 ppm). The following abbreviations were used to indicate the signal multiplicity: for the  $^1\text{H}$  NMR spectra: s (singlet), d (doublet), t (triplet), q (quartet), quint (quintet), sext (sextet), sept (septet), m (multiplet), as well as their combinations; for the  $^{13}\text{C}$  NMR spectra: s (quaternary carbon), d (tertiary carbon (CH)), t (secondary carbon (CH<sub>2</sub>)) and q (primary carbon (CH<sub>3</sub>)). All the  $^{13}\text{C}$  NMR spectra were measured with  $^1\text{H}$ -decoupling and were interpreted with DEPT135,  $^1\text{H}, ^1\text{H}$ -COSY and HMBC. All spectra were integrated and processed using TopSpin 3.5 software or MestReNova 14.1.0. Mass spectra (MS and HRMS) were determined at the University of Heidelberg under the direction of Dr. J. Gross. EI<sup>+</sup>, ESI<sup>+</sup> -, or DART<sup>+</sup> -spectra were measured on a Bruker Apex-Qu FT-ICR-MS spectrometer, MALDI on a Bruker Autoflex speed MALDI-TOF instrument. Flash Column Chromatography was accomplished using Silica gel 60 (0.04 – 0.063 mm / 230 – 400 mesh ASTM) purchased from Macherey-Nagel as stationary phase. As eluents the respectively mentioned proportions of petroleum ether (PE), ethyl acetate (EA) and dichloromethane (DCM) were used. Analytical Thin Layer Chromatography (TLC) was carried out on precoated Macherey-Nagel POLYGRAM® SIL G/UV254 or Merck TLC Silical Gel 60 F254 aluminum sheets. Detection was accomplished using UV-light (254 nm). IR spectra were recorded on a Bruker Vector 22, and the absorption maxima were given in wavelength in  $\text{cm}^{-1}$  units. Melting point was recorded on BÜCHI Melting Point B-540. The cyclic voltammetry (CV) experiments were carried out using PGSTAT101 Potentiostat Galvanostat with a platinum working electrode (Metrohm 6.120.4190, diameter 1 mm), a platinum/titan wire auxiliary electrode (Metrohm 3.109.0790), a silver wire reference electrode (Metrohm 6.1241.060), a  $0.1 \text{ mol} \cdot \text{L}^{-1}$   $\text{Bu}_4\text{NPF}_6$  solution in degassed, dry DCM, and ferrocene/ferrocenium as the reference redox system and internal standard (-4.8 eV) for 0.0 V versus  $\text{Fc}^+/\text{Fc}$  at room temperature and  $0.1 \text{ Vs}^{-1}$ . To determine the reduction and oxidation potentials, the half-wave potentials were used.<sup>[1]</sup> X-ray single-crystal structure analyses were measured on a Bruker Smart APEX-II Quazar Area Detector diffractometer by Dr. F. Rominger (Heidelberg University). Diffraction intensities were corrected for Lorentz and polarization effects. An empirical absorption correction was applied using SADABS based on the Laue symmetry of reciprocal space. Heavy atom diffractions were solved by direct methods and refined against F<sub>2</sub> with the full matrix least square algorithm. Hydrogen atoms were either isotropically refined or calculated. The structures were solved and refined using the SHELXTL software package. Absorption spectra were recorded on a Jasco UV-Vis V-670. Fluorescence spectra were recorded on a Jasco FP-6500. Quantum yields were determined by an Ulbricht sphere (6 inch) using a PTI QuantaMaster 40 equipped with a Hamamatsu R928P Photomultiplier. Quantum lifetimes were determined on a Horiba FluoroCube-01-NL lifetime spectrofluorometer with emission monochromator (Seya-Namioka type, 200 nm to 800 nm) and diode excitation (Nano-LED N-375L,  $375 \pm 10 \text{ nm}$ ,  $< 200 \text{ ps}$ ).

### 1.2. Synthesis of Ynamides

#### 1.2.1. Synthesis of Ynamides 1a–b

#### 4-methyl-N-(phenanthren-9-yl)benzenesulfonamide 12

## SUPPORTING INFORMATION

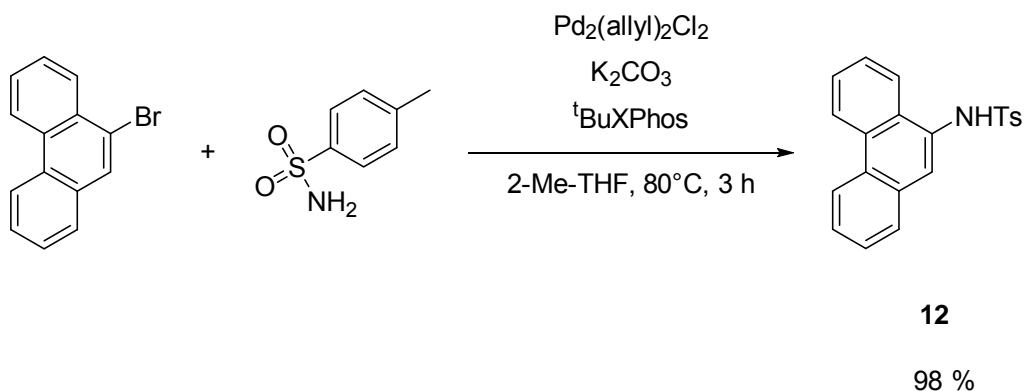

After Navarro *et al.*<sup>[2]</sup>

To a suspension of  $\text{Pd}_2(\text{allyl})_2\text{Cl}_2$  (58 mg, 155  $\mu\text{mol}$ , 2 mol % Pd),  $\text{K}_2\text{CO}_3$  (4.30 g, 31.11 mmol, 2.0 eq),  $^t\text{BuXPhos}$  (132 mg, 311  $\mu\text{mol}$ , 2 mol %) and Tosylamide (3.20 g, 18.67 mmol, 1.2 eq) in 100 ml dry 2-methyl-THF was added under nitrogen atmosphere 9-bromophenanthrene (4.00 g, 15.56 mmol, 1.0 eq). The reaction mixture was stirred at room temperature for 10 minutes and was then heated and stirred in a pre-warmed oil bath at 80°C for 3 hours. After cooling down, 100 ml of ethyl acetate and 100 ml 1M HCl were added and the layers were separated. The aqueous phase was extracted with ethyl acetate (3 x 100 ml) and the combined organic layer was washed with brine, dried over  $\text{Na}_2\text{SO}_4$  and filtered. The solvent was removed under reduced pressure and the crude product was recrystallized from ethyl acetate. The product was isolated as colourless solid (5.298 g, 15.25 mmol, 98 % yield).

$^1\text{H}$  NMR (300 MHz,  $\text{CDCl}_3$ )  $\delta$  (ppm) = 2.32 (s, 3H), 6.85 (s, 1H), 7.14 (d, 2H,  $J = 8.0$  Hz), 7.48-7.71 (m, 7H), 7.80 (dd, 1H,  $J = 7.5$  Hz,  $J = 1.8$  Hz), 7.88 (d, 1H,  $J = 7.4$  Hz), 8.61 (d, 1H,  $J = 8.0$  Hz), 8.67 (d, 1H,  $J = 8.2$  Hz);  $^{13}\text{C}$  NMR (125 MHz,  $\text{CDCl}_3$ ) = 21.6 (q), 122.1 (d), 122.6 (d), 123.2 (d), 123.3 (d), 127.1 (d), 127.1 (d), 127.2 (d), 127.2 (d), 127.5 (d), 128.2 (s), 128.9 (d), 129.4 (s), 129.7 (d), 129.8 (s), 131.3 (s), 131.4 (s), 136.5 (s), 144.0 (s); FTIR (Neat)  $\nu$  [ $\text{cm}^{-1}$ ]: 3254, 3064, 2924, 1924, 1738, 1598, 1498, 1453, 1416, 1362, 1321, 1300, 1221, 1187, 1156, 1108, 1089, 1069, 1038, 1022, 951, 908, 888, 864, 818, 797, 762, 747, 723, 707, 670, 615; HRMS- $\text{EI}^+$ : Calc. for  $\text{C}_{21}\text{H}_{17}\text{NO}_2\text{S}$ : 347.0941, found 347.0975; Mp: 195 °C.

#### 4-methyl-N-(naphthalen-2-yl)benzenesulfonamide 13

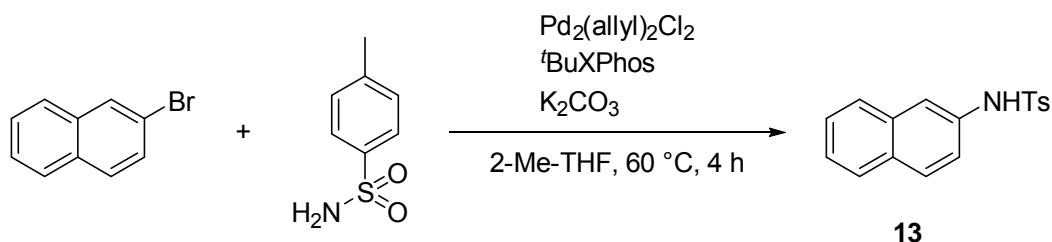

$\text{Pd}_2(\text{allyl})_2\text{Cl}_2$  (35 mg, 97  $\mu\text{mol}$ , 1 mol%) and *tert*-butyl XPhos (82 mg, 193  $\mu\text{mol}$ , 2 mol%) were added under nitrogen atmosphere to a suspension of  $\text{K}_2\text{CO}_3$  (2.67 g, 19.32 mmol, 2.0 eq) in 30 ml dry 2-Me-THF and stirred for 5 minutes at room temperature. Then Tosylamide (1.98 g, 11.59 mmol, 1.2 eq) and 2-bromonaphthalene (2.00 g, 9.66 mmol, 1.0 eq) were added subsequently and the reaction mixture was stirred at 60 °C for 4 hours. After cooling down to room temperature, water (20 ml) and 1 M HCl (30 ml) were added and the layers were separated. The aqueous phase was extracted with ethyl acetate (2 x 100 ml) and the combined organic layer was washed with brine, dried over  $\text{Na}_2\text{SO}_4$  and filtered. The solvent was removed under reduced pressure and the crude product was purified via recrystallization from ethyl acetate/hexane. The product was isolated as colourless solid (1.993 g, 6.70 mmol, 69 % yield).

Spectral data according to literature<sup>[3]</sup>

#### N-ethynyl-4-methyl-N-(phenanthren-9-yl)benzenesulfonamide 14

## SUPPORTING INFORMATION

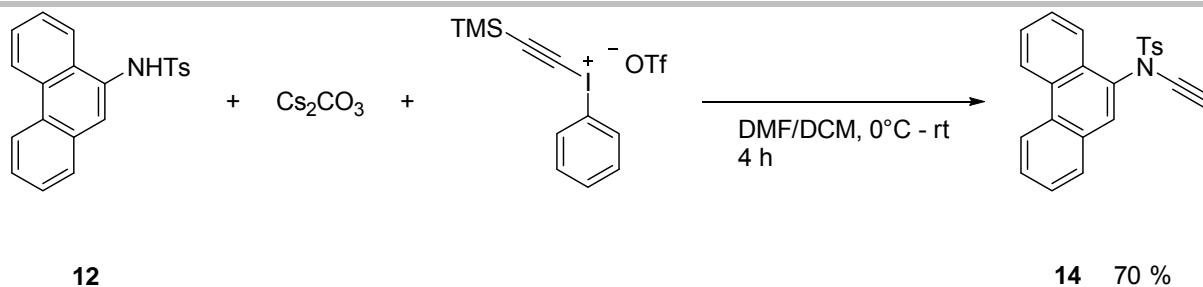

To a solution of 4-methyl-N-(phenanthren-9-yl)benzenesulfonamide **12** (2.54 g, 7.31 mmol, 1.0 eq) in 40 ml DMF was added Cs<sub>2</sub>CO<sub>3</sub> (3.10 g, 9.50 mmol, 1.3 eq) and the reaction mixture was stirred at room temperature for 30 min until the solution was cooled to 0°C and phenyl((trimethylsilyl)ethynyl)iodonium triflate (4.28 g, 9.50 mmol, 1.3 eq) in 15 ml DCM was added dropwise. The ice bath was then removed and the reaction mixture was stirred at room temperature for 4 hours. Then 40 ml water and 50 ml ethyl acetate were added and the layers were separated. The aqueous phase was extracted with ethyl acetate (3 x 50 ml), and the combined organic layer was washed with brine, dried over Na<sub>2</sub>SO<sub>4</sub> and filtered. The solvent was removed under reduced pressure and the crude product was purified via silica gel flash column chromatography with PE/DCM (2:1) as an eluent. The product was isolated as colourless solid (1.89 g, 5.09 mmol, 70 % yield).

R<sub>f</sub>: 0.59 (silica, PE/DCM 2:1); <sup>1</sup>H NMR (500 MHz, CDCl<sub>3</sub>) δ (ppm) = 2.50 (s, 3H), 2.84 (s, 1H), 7.35 (d, *J* = 8.4 Hz, 2H), 7.47 (s, 1H), 7.55-7.66 (m, 2H), 7.67-7.90 (m, 5H), 8.10 (d, *J* = 8.2 Hz, 1H), 8.69 (t, *J* = 7.5 Hz, 2H); <sup>13</sup>C NMR (125 MHz, CDCl<sub>3</sub>) = 21.9 (q), 58.1 (d), 77.4 (s), 122.9 (d), 123.0 (d), 124.3 (d), 127.2 (d), 127.3 (d), 127.5 (d), 127.6 (d), 128.2 (d), 128.7 (d), 129.1 (s), 129.2 (d), 129.9 (d), 130.9 (s), 131.0 (s), 131.6 (s), 133.5 (s), 133.9 (s), 145.4 (s); FTIR (Neat) ν [cm<sup>-1</sup>]: 3279, 3080, 2128, 1737, 1597, 1492, 1451, 1371, 1308, 1234, 1173, 1118, 1090, 1052, 1034, 948, 903, 882, 855, 831, 808, 766, 742, 722, 702, 677, 664, 630, 605; HRMS-EI<sup>+</sup>: Calc. for C<sub>23</sub>H<sub>17</sub>NO<sub>2</sub>S: 371.0975, found 371.0977; Mp: 137 °C.

**N-(3-hydroxyprop-1-yn-1-yl)-4-methyl-N-(phenanthren-9-yl)benzenesulfonamide 15**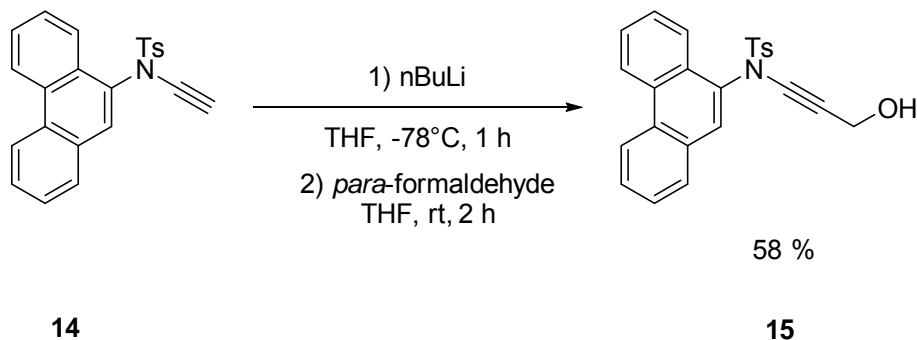

N-ethynyl-4-methyl-N-(phenanthren-9-yl)benzenesulfonamide **14** (1.60 g, 4.31 mmol, 1.0 eq) was dissolved under nitrogen atmosphere in 80 ml dry THF. The solution was cooled to -78 °C and *n*-butyllithium (331 mg, 5.17 mmol, 1.2 eq, 2.5 M in hexane, 2.07 ml) was added dropwise and the reaction mixture was stirred at -78°C for 45 min until *para*-formaldehyde (647 mg, 21.54 mmol, 5.0 eq) was added at once and the reaction mixture was slowly warmed up to room temperature and stirred for 16 h. Then the reaction was quenched with 10 ml sat. NH<sub>4</sub>Cl solution and was diluted with 50 ml water. THF was removed under reduced pressure and the aqueous phase was extracted with ethyl acetate (3 x 75 ml). The combined organic layer was washed with brine, dried over Na<sub>2</sub>SO<sub>4</sub>, and filtered. The solvent was removed under reduced pressure and the crude product was purified via silica gel flash column chromatography with DCM (100 %) as an eluent. The product was further purified by washing with methanol (10 ml) and isolated as colourless solid (1.00 g, 2.49 mmol, 58 % yield).

R<sub>f</sub>: 0.34 (silica, DCM, 100 %); <sup>1</sup>H NMR (400 MHz, CDCl<sub>3</sub>) δ (ppm) = 1.52 (t, *J* = 4.5 Hz, 1H), 2.50 (s, 3H), 4.39 (d, *J* = 4.5 Hz, 2H), 7.35 (d, *J* = 8.1 Hz, 2H), 7.45 (s, 1H), 7.60 (t, *J* = 7.5 Hz, 2H), 7.64-7.85 (m, 5H), 8.06 (dd, *J* = 8.2 Hz, 1.0 Hz, 1H), 8.69 (t, *J* = 6.9 Hz, 1H); <sup>13</sup>C NMR (100 MHz, CDCl<sub>3</sub>): 21.9 (q), 51.5 (t), 68.6 (s), 80.8 (s), 122.9 (d), 123.0 (d), 124.4 (d), 127.3 (d), 127.4 (d), 127.5 (d), 127.6 (d), 128.2 (d), 128.7 (d), 129.2 (d), 129.3 (s), 129.9 (d), 130.9 (s), 131.0 (s), 131.7 (s), 133.9 (s),

## SUPPORTING INFORMATION

134.2 (s), 145.4 (s); FTIR (Neat)  $\nu$  [ $\text{cm}^{-1}$ ]: 3521, 3069, 2921, 2860, 2242, 1597, 1495, 1452, 1364, 1316, 1216, 1187, 1167, 1088, 1070, 1012, 912, 869, 813, 749, 725, 703, 664, 631, 606; HRMS-ESI: Calc. for  $\text{C}_{24}\text{H}_{19}\text{NNaO}_3\text{S}$ : 424.0978, found: 424.0987; Mp: 149 °C.

**N-(3-((tert-butyldimethylsilyl)oxy)prop-1-yn-1-yl)-4-methyl-N-(phenanthren-9-yl)benzenesulfonamide 1a**

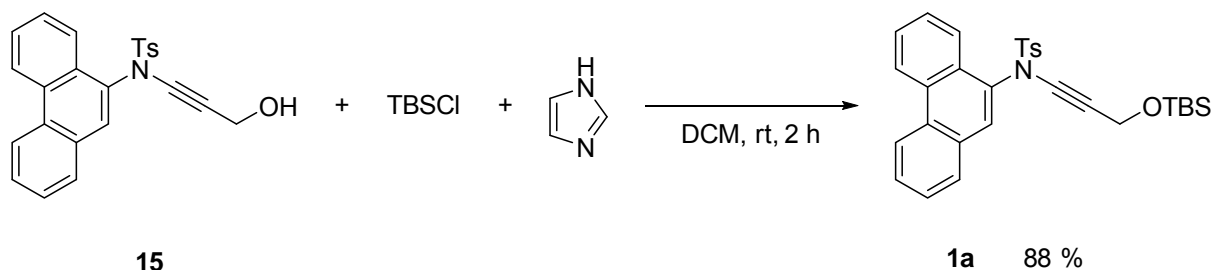

N-(3-hydroxyprop-1-yn-1-yl)-4-methyl-N-(phenanthren-9-yl)benzenesulfonamide **15** (600 mg, 1.49 mmol, 1.0 eq) was dissolved under nitrogen atmosphere in 15 ml dry DCM and TBSCl, (451 mg, 2.99 mmol, 2.0 eq) and 1-H imidazole (203 mg, 2.99 mmol, 2.0 eq) were added and the reaction mixture was stirred at room temperature for 2 hours. Then water (10 ml) was added and the layers were separated. The aqueous phase was extracted with DCM (2 x 30 ml) and the combined organic layer was washed with brine, dried over  $\text{Na}_2\text{SO}_4$  and filtered. The solvent was removed under reduced pressure and the crude product was purified via silica gel flash column chromatography with PE/EA (10:1) as an eluent. The product was further washed with a small amount of methanol to obtain a colourless solid (680 mg, 1.32 mmol, 88 % yield).

$R_f$  = 0.65 (silica, DCM/PE 2:1);  $^1\text{H}$  NMR (500 MHz,  $\text{CDCl}_3$ )  $\delta$  (ppm) = 0.05 (s, 6H), 0.87 (s, 9H), 2.50 (s, 3H), 4.43 (s, 2H), 7.34 (d,  $J$  = 8.3 Hz, 2H), 7.44 (s, 1H), 7.56-7.62 (m, 2H), 7.68-7.72 (m, 3H), 7.74 (d,  $J$  = 7.9 Hz, 1H), 7.79 (d,  $J$  = 8.3 Hz, 2H), 8.10 (d,  $J$  = 8.1 Hz, 1H), 8.69 (t,  $J$  = 8.2 Hz, 2H);  $^{13}\text{C}$  NMR (100 MHz,  $\text{CDCl}_3$ ): 5.0 (q), 18.4 (s), 21.9 (q), 25.9 (q), 52.1 (t), 69.0 (s), 79.7 (s), 122.9 (d), 123.0 (d), 124.6 (d), 127.2 (d), 127.3 (d), 127.4 (d), 127.5 (d), 128.1 (d), 128.8 (d), 129.2 (d), 129.4 (s), 129.8 (d), 130.9 (s), 131.1 (s), 131.7 (s), 134.1 (s), 134.2 (s), 145.2 (s); FTIR (Neat)  $\nu$  [ $\text{cm}^{-1}$ ]: 3065, 2954, 2929, 2857, 2242, 1736, 1595, 1496, 1471, 1454, 1389, 1359, 1315, 1294, 1252, 1215, 1171, 1108, 1069, 1057, 1013, 997, 943, 915, 892, 834, 816, 773, 758, 745, 722, 703, 660, 633, 605; HRMS-ESI: Calc. for  $\text{C}_{30}\text{H}_{34}\text{NO}_3\text{SSi}^+$ : 516.2029, found: 516.2023; mp: 140 °C.

**N-(3-((tert-butyldimethylsilyl)oxy)prop-1-yn-1-yl)-4-methyl-N-(naphthalen-2-yl)benzenesulfonamide 1b**

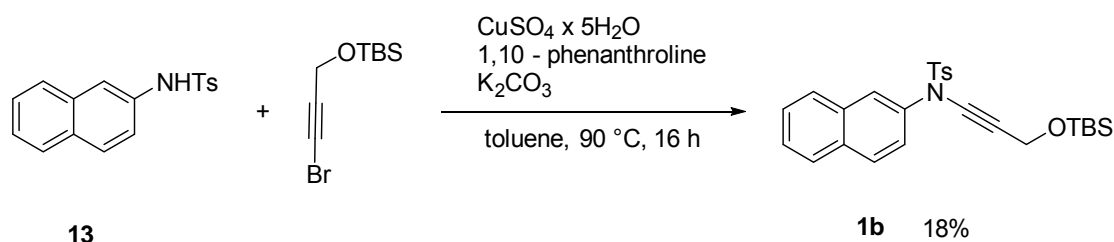

4-methyl-N-(naphthalen-2-yl)benzenesulfonamide **13** (1.00 g, 3.36 mmol, 1.0 eq), bromo-alkyne (1.26 g, 5.04 mmol, 1.5 eq),  $\text{CuSO}_4 \times 5\text{H}_2\text{O}$  (126 mg, 0.504 mmol, 15 mol%), phenanthroline (182 mg, 1.01 mmol, 30 mol%) and  $\text{K}_2\text{CO}_3$  (0.93 g, 6.73 mmol, 2.0 eq) were suspended under nitrogen atmosphere in 5 ml dry toluene and the reaction mixture was stirred at 90 °C for 16 hours. After cooling down to room temperature, water was added, and the layers were separated. The aqueous layer was extracted with ethyl acetate (2x 50 ml) and the combined organic layer was washed with water, brine, dried over  $\text{Na}_2\text{SO}_4$ , and filtered. The solvent was removed under reduced pressure and the crude product was purified via silica gel flash column chromatography with PE/EA (10:1) as an eluent. The product was isolated as colourless oil (280 mg, 0.601 mmol, 18% yield).  $^1\text{H}$  NMR (500 MHz,  $\text{CDCl}_3$ )  $\delta$  (ppm) = 0.10 (s, 6H), 0.90 (s, 9H), 2.43 (s, 3H), 4.49 (s, 2H), 7.25 (d,  $J$  = 8.1 Hz, 2H), 7.35 (dd,  $J$  = 8.8, 2.2 Hz, 1H), 7.48-7.54 (m, 2H), 7.59 (d,  $J$  = 8.3 Hz, 2H), 7.59 (d,  $J$  = 8.3 Hz, 2H), 7.73 (d,  $J$  = 2.0 Hz, 1H), 7.75-7.80

## SUPPORTING INFORMATION

(m, 2H), 7.81-7.85 (m, 1H);  $^{13}\text{C}$  NMR (125 MHz,  $\text{CDCl}_3$ ) = -5.0 (q), 18.4 (s), 21.8 (q), 25.9 (q), 52.0 (t), 70.0 (s), 78.8 (s), 124.3 (d), 125.2 (d), 126.8 (d), 126.9 (d), 127.8 (d), 128.3 (d), 128.4 (d), 129.1 (d), 129.7 (d), 132.7 (s), 133.3 (s), 133.4 (s), 136.3 (s), 145.0 (s); IR (ATR):  $\tilde{\nu}$  [ $\text{cm}^{-1}$ ] = 3060, 2954, 2929, 2885, 2856, 2243, 1597, 1509, 1464, 1375, 1291, 1255, 1187, 1174, 1151, 1121, 1077, 1006, 969, 928, 902, 834, 813, 778, 747, 704, 667, 648, 631; HRMS-EI+: Calc. for  $\text{C}_{26}\text{H}_{31}\text{NO}_3\text{SiS}^+$ : 465.1788 m/z, found: 465.1741 m/z.

## 1.2.2. Synthesis of Ynamide 9

2,7-di-*tert*-butylpyrene 16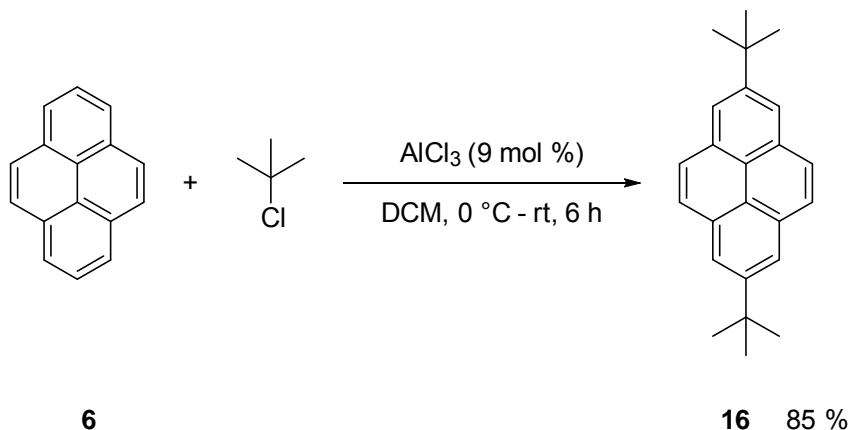

After Zhang *et al.*<sup>[4]</sup>

Pyrene **6** (6.06 g, 29.96 mmol, 1.0 eq) and  $\text{AlCl}_3$  (359 mg, 2.70 mmol, 9 mol %) were dissolved in 300 ml dry DCM under nitrogen atmosphere and *tert*-butylchloride (6.10 g, 65.92 mmol, 2.2 eq) in 45 ml dry DCM was added dropwise at 0 °C. The solution was then warmed to room temperature and kept stirring for 6 hours. After this time ice (100 g) and 15 ml conc. HCl solution were added and the layers were separated. The organic solution was washed with water (3 x 150 ml), brine (150 ml), dried over  $\text{Na}_2\text{SO}_4$  and filtered. The solvent was removed under reduced pressure and the product was purified with silica gel flash column chromatography with PE (100 %) as an eluent and recrystallization from PE. The product was isolated as colourless solid (8.02 g, 25.50 mmol, 85 % yield).

$R_f$  (silica, PE) = 0.28;  $^1\text{H}$  NMR ( $\text{CDCl}_3$ , 300 MHz),  $\delta$  [ppm] = 1.59 (s, 18 H), 8.03 (s, 4H), 8.19 (s, 4H);

Data are according to literature<sup>[4]</sup>.

1,1'-(2,7-di-*tert*-butylpyrene-4,9-diyl)bis(ethan-1-one) 17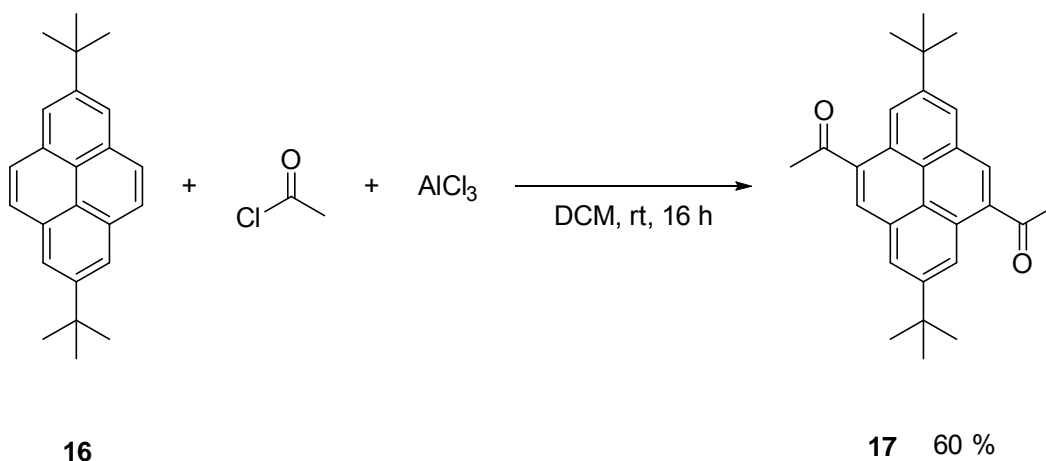

## SUPPORTING INFORMATION

Under nitrogen atmosphere 2,7-di-tert-butylpyrene **16** (50.0 mg, 159  $\mu\text{mol}$ , 1.0 eq) and acetyl chloride (187 mg, 2.38 mmol, 15 eq) were dissolved in anhydrous DCM (1 ml). At 0 °C aluminium(III)chloride (212 mg, 1.59 mmol, 10 eq) was added in portions. The mixture was stirred for 1 h at room temperature and was quenched with dest. water (10 ml) afterwards. The layers were separated and the aqueous layer was extracted with ethyl acetate (3 x 10 ml). The combined organic layer was washed with KOH-solution and brine (each 10 ml), dried over  $\text{Na}_2\text{SO}_4$ , and filtered. The solvent was removed under reduced pressure and the crude product was purified by recrystallization from ethyl acetate. A yellowish solid was obtained (38.0 mg, 95.4  $\mu\text{mol}$ , 60%).

$R_f$  (silica, PE/EA (5:1)) = 0.12;  $^1\text{H NMR}$  ( $\text{CDCl}_3$ , 600 MHz),  $\delta$  [ppm] = 1.60 (s, 18H), 2.95 (s, 6H), 8.33 (d, 2H,  $J = 1.85$  Hz), 8.63 (s, 2H), 9.41 (d, 2H,  $J = 1.85$  Hz);  $^{13}\text{C NMR}$  ( $\text{CDCl}_3$ , 150 MHz) = 29.9 (q), 32.0 (q), 35.7 (s), 124.8 (d), 124.9 (s), 127.4 (s), 129.0 (s), 133.7 (d), 133.8 (s), 150.2 (s), 201.6 (s).

Data according to literature<sup>[5]</sup>

### 1,1'-(2,7-di-tert-butylpyrene-4,9-diyl)bis(ethan-1-ol) **7**

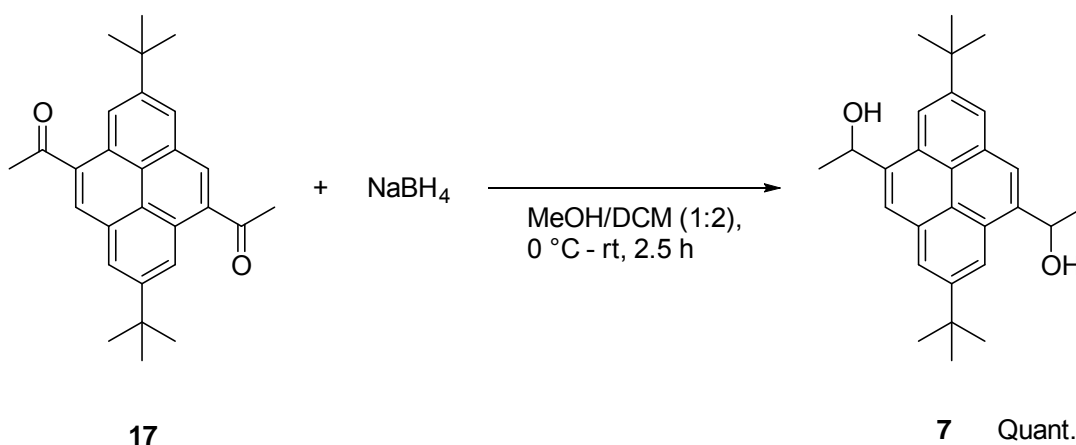

1,1'-(2,7-di-tert-butylpyrene-4,9-diyl)bis(ethan-1-one) **17** (1.00 g, 2.51 mmol, 1.0 eq) was dissolved in a mixture of DCM and methanol (2:1, 170 ml). Then the solution was cooled to 0 °C and  $\text{NaBH}_4$  (380 mg, 10.0 mmol, 4.0 eq) was added in portions and the reaction mixture was stirred at room temperature for 2.5 hours. Then 200 ml water was added and the layers were separated. The aqueous phase was extracted with DCM (3 x 50 ml) and the combined organic layer was washed with water, brine, dried over  $\text{Na}_2\text{SO}_4$  and filtered. The solvent was removed under reduced pressure to obtain the product as colourless solid (1.02 g, 2.51 mmol, quant. Yield).

$R_f$  (silica, PE/EA (5:1)) = 0.35;  $^1\text{H NMR}$  ( $\text{CDCl}_3$ , 600 MHz),  $\delta$  [ppm] = 1.59 (s, 18 H), 1.84 (dd, 6H,  $J = 6.3$  Hz,  $J = 1.8$  Hz), 5.89 (dd, 2H,  $J = 12.9$  Hz,  $J = 6.7$  Hz), 8.23-8.24 (m, 4H), 8.43-8.44 (m, 2H);  $^{13}\text{C NMR}$  ( $\text{CDCl}_3$ , 150 MHz) = 24.4 (q), 32.1 (q), 35.5 (s), 67.7 (d), 118.2 (d), 122.7 (d), 123.0 (s), 123.5 (d), 128.4 (s), 130.9 (s), 140.4 (s), 140.5 (s), 148.6 (s); FTIR (Neat)  $\nu$  [ $\text{cm}^{-1}$ ]: 3295, 2961, 2903, 2866, 1812, 1724, 1601, 1464, 1448, 1393, 1362, 1260, 1231, 1150, 1124, 1072, 1003, 958, 906, 872, 715, 701, 636; HRMS-EI+: Calc. for  $\text{C}_{28}\text{H}_{34}\text{O}_2$ : 402.2553, found 402.2554; Mp: 251 °C.

### 2,7-di-tert-butylpyrene-4,9-diamine **8**



## SUPPORTING INFORMATION

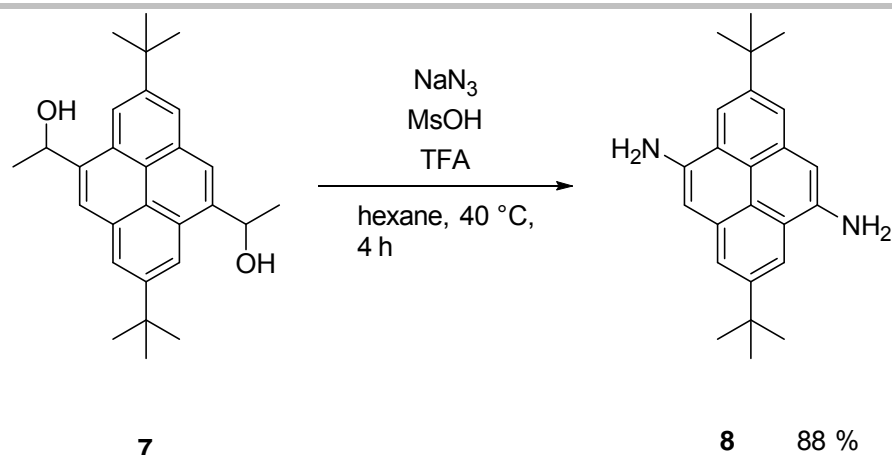

1,1'-(2,7-di-tert-butylpyrene-4,9-diyl)bis(ethan-1-ol) **7** (250 mg, 0.621 mmol, 1.0 eq) was dissolved in a mixture of 6.5 ml hexane, methane sulfonic acid (0.716 g, 7.45 mmol, 12 eq) and trifluoroacetic acid (1.70 g, 14.90 mmol, 24 eq) and  $\text{NaN}_3$  (202 mg, 3.10 mmol, 5 eq) was added in portions. The reaction mixture was stirred under exclusion of light at 40 °C for 4 hours. Then 10 ml sat.  $\text{NaHCO}_3$  solution and 10 ml ethyl acetate was added, and the layers were separated. The aqueous layer was extracted with ethyl acetate (3 x 10 ml) and the combined organic layer was washed with brine. The solvent was removed under reduced pressure and the crude product was redissolved in 5 ml THF and the solution was cooled to 0 °C. Then conc. HCl (0.5 ml) was added dropwise under stirring and after 30 min the resulting precipitate was filtered and washed with water, THF and methanol. The solid was then again redissolved in a mixture of a mixture triethylamine and DCM and washed with a diluted solution of  $\text{K}_2\text{CO}_3$  in water (2 x 20 ml), brine, and dried over  $\text{Na}_2\text{SO}_4$ . The suspension was filtered, and the solvent was removed under reduced pressure to obtain the pure product as yellow solid (188 mg, 545  $\mu\text{mol}$ , 88% yield).

$R_f$  (silica, PE/EA (2:1)) = 0.30;  $^1\text{H NMR}$  ( $\text{CD}_2\text{Cl}_2$ , 600 MHz),  $\delta$  [ppm] = 1.55 (s, 18H), 4.41 (bs, 4H), 7.23 (s, 2H), 7.94 (s, 2H), 7.99 (s, 2H);  $^{13}\text{C NMR}$  ( $\text{CD}_2\text{Cl}_2$ , 150 MHz) = 31.8 (q), 35.3 (s), 106.6 (d), 112.3 (d), 119.4 (s), 120.4 (d), 124.3 (s), 132.6 (s), 141.5 (s), 148.5 (s); FTIR (Neat)  $\nu$  [ $\text{cm}^{-1}$ ]: 3380, 2948, 2900, 2863, 1756, 1620, 1603, 1491, 1473, 1389, 1360, 1270, 1256, 1221, 1200, 1170, 912, 877, 830, 734, 687, 631; HRMS- $\text{EI}^+$ : Calc. for  $\text{C}_{24}\text{H}_{28}\text{N}_2$ : 344.2247, found 344.2242; Mp: 50 °C (decomp.).

**N,N'-(2,7-di-tert-butylpyrene-4,9-diyl)bis(4-methylbenzenesulfonamide) 18**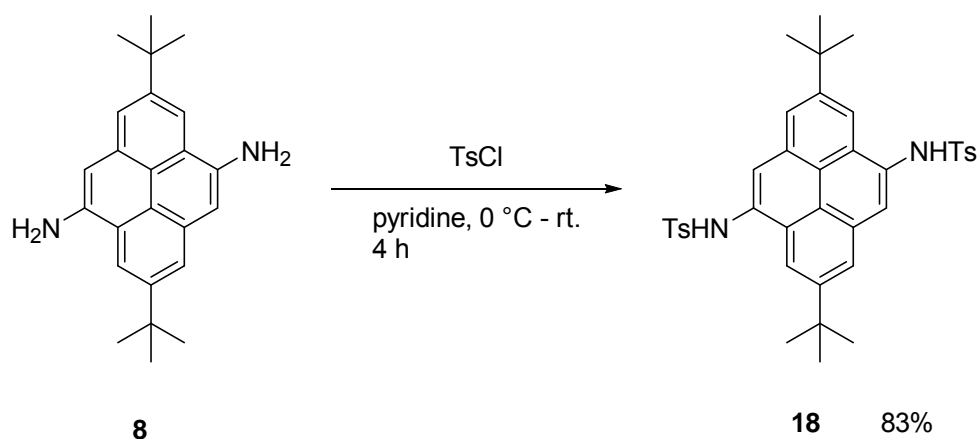

2,7-di-tert-butylpyrene-4,9-diamine **8** (158 mg, 459  $\mu\text{mol}$ , 1.0 eq) was dissolved in 10 ml pyridine and 2 ml DCM and tosyl chloride (262 mg, 1.38 mmol, 3 eq) was added at 0 °C. The ice bath was removed, and the reaction mixture was stirred at room temperature for 4 hours. Then the solvent was removed under reduced pressure and water was added. The resulting

## SUPPORTING INFORMATION

suspension was filtered and washed with water, methanol, DCM and hexane. The product was isolated as colourless solid (248 mg, 380  $\mu\text{mol}$ , 83% yield).

$^1\text{H}$  NMR (DMSO- $d_6$ , 300 MHz),  $\delta$  [ppm] = 1.37 (s, 18H), 2.21 (s, 6H), 7.16 (d, 4H,  $J$  = 8.1 Hz), 7.56 (d, 4H,  $J$  = 8.1 Hz), 8.06 (s, 2H), 8.12 (s, 2H), 8.21 (s, 2H), 10.52 (s, 2H);  $^{13}\text{C}$  NMR (DMSO- $d_6$ , 75 MHz) = 20.8 (q), 31.4 (q), 35.1 (s), 118.2 (d), 121.1 (s), 122.7 (d), 124.3 (d), 126.3 (s), 126.4 (d), 129.6 (d), 130.0 (s), 131.5 (s), 137.9 (s), 142.8 (s), 148.5 (s); FTIR (Neat)  $\nu$  [ $\text{cm}^{-1}$ ]: 3274, 2957, 2903, 2867, 1599, 1466, 1436, 1378, 1321, 1259, 1217, 1166, 1147, 1131, 1091, 973, 918, 880, 847, 809, 751, 704, 685, 664; HRMS-ESI pos: Calc. for  $\text{C}_{38}\text{H}_{40}\text{N}_2\text{NaO}_4\text{S}_2$ : 675.2327, found 675.2326; Mp:  $>300$   $^\circ\text{C}$ .

**N,N'-(2,7-di-tert-butylpyrene-4,9-diyl)bis(N-ethynyl-4-methylbenzenesulfonamide) 19**

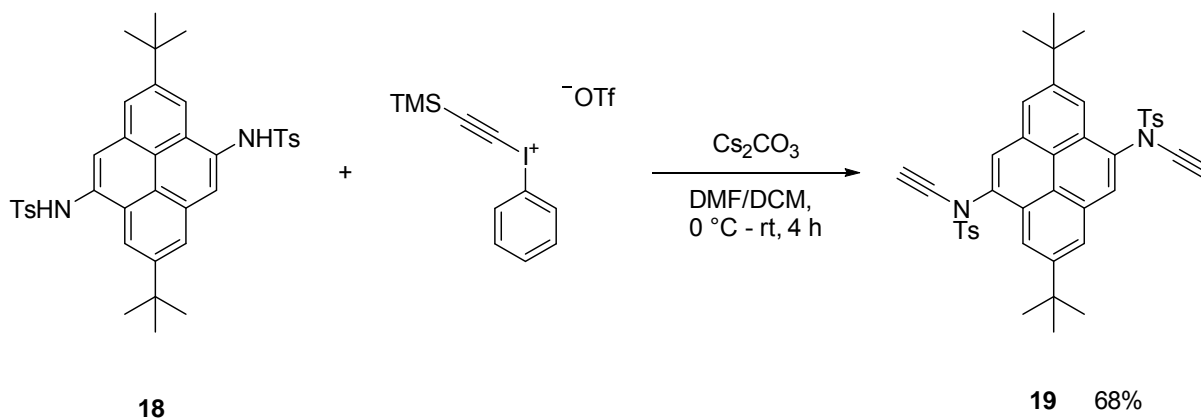

N,N'-(2,7-di-tert-butylpyrene-4,9-diyl)bis(4-methylbenzenesulfonamide) **18** (425 mg, 651  $\mu\text{mol}$ , 1.0 eq) was dissolved in 6.5 ml DMF and  $\text{Cs}_2\text{CO}_3$  (551 mg, 1.69 mmol, 2.6 eq) was added. The reaction mixture was stirred at room temperature for 30 min and then phenyl(trimethylsilyl)ethynyl triflate (879 mg, 1.95 mmol, 3.0 eq) in 2.5 ml DCM was added dropwise at 0  $^\circ\text{C}$ . The ice bath was removed and the reaction mixture was stirred at room temperature for 4 hours. Then 50 ml ethyl acetate and 50 ml water was added and the layers were separated. The aqueous phase was extracted with ethyl acetate (3 x 50 ml) and the combined organic layer was washed with water, brine, dried over  $\text{Na}_2\text{SO}_4$  and filtered. The solvent was removed under reduced pressure and the crude product was purified via silica gel flash column chromatography with DCM/PE (1:1) as an eluent. The product was isolated as colourless solid (309 mg, 441  $\mu\text{mol}$ , 68% yield).

$R_f$  (silica, PE/DCM (1:1)) = 0.58;  $^1\text{H}$  NMR ( $\text{CD}_2\text{Cl}_2$ , 300 MHz),  $\delta$  [ppm] = 1.39 (s, 18H), 2.44 (s, 6H), 3.02 (s, 2H), 7.31 (d, 4H,  $J$  = 8.1 Hz), 7.72 (d, 4H,  $J$  = 8.1 Hz), 8.06 (s, 2H), 8.17 (d, 2H,  $J$  = 1.7 Hz), 8.21 (d, 2H,  $J$  = 1.7 Hz);  $^{13}\text{C}$  NMR ( $\text{CD}_2\text{Cl}_2$ , 100 MHz) = 21.8 (q), 31.7 (q), 35.6 (s), 59.3 (d), 77.3 (s), 120.4 (d), 124.0 (s), 124.6 (d), 127.1 (s), 128.7 (d), 129.7 (s), 130.4 (d), 130.5 (s), 133.7, 134.7 (s), 146.1 (s), 150.1 (s). FTIR (Neat)  $\nu$  [ $\text{cm}^{-1}$ ]: 3282, 2963, 2869, 2131, 1735, 1611, 1596, 1462, 1396, 1362, 1306, 1251, 1215, 1172, 1089, 973, 930, 905, 888, 842, 814, 706, 693, 666, 633; HRMS-ESI pos: Calc. for  $\text{C}_{42}\text{H}_{41}\text{N}_2\text{O}_4\text{S}_2$ : 701.2508, found: 701.2510; Mp: 235  $^\circ\text{C}$  (decomp.).

**N,N'-(2,7-di-tert-butylpyrene-4,9-diyl)bis(N-(3-hydroxyprop-1-yn-1-yl)-4-methylbenzenesulfonamide) 20**

## SUPPORTING INFORMATION

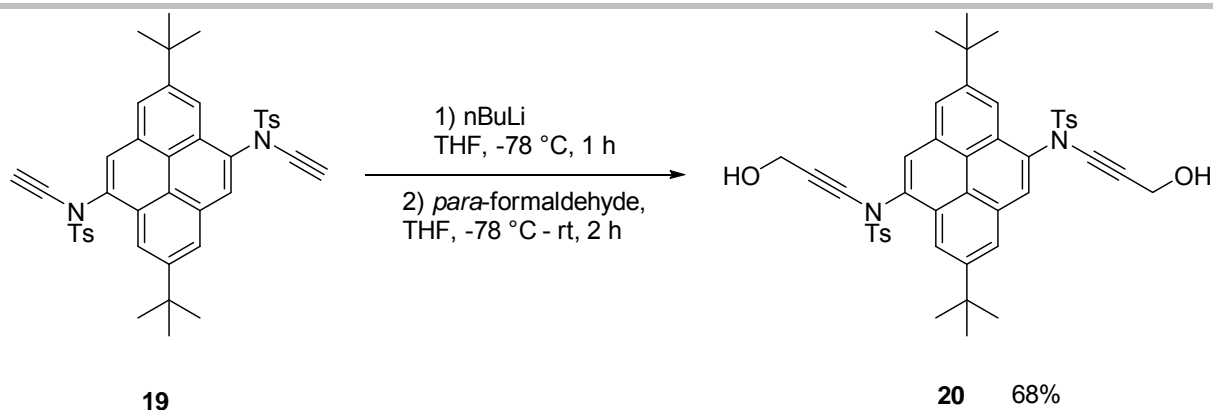

N,N'-(2,7-di-tert-butylpyrene-4,9-diyl)bis(N-ethynyl-4-methylbenzenesulfonamide) **19** (100 mg, 143  $\mu\text{mol}$ , 1.0 eq) was dissolved under nitrogen atmosphere in 5 ml dry THF and the solution was cooled to  $-78\text{ }^{\circ}\text{C}$ . Then *n*-BuLi (2.5 M in hexane, 22 mg, 342  $\mu\text{mol}$ , 0.855 ml, 2.4 eq) was added dropwise and the reaction mixture was stirred at  $-78\text{ }^{\circ}\text{C}$  for 1 hour. Then *para*-formaldehyde (86 mg, 2.85 mmol, 20 eq) was added and the reaction mixture was warmed gradually to room temperature and stirred for 2 hours. Then 15 ml water was added to quench the reaction and THF was removed under reduced pressure. The aqueous phase was extracted with ethyl acetate (3 x 20 ml) and the combined organic layer was washed with brine, dried over  $\text{Na}_2\text{SO}_4$  and filtered. The solvent was removed under reduced pressure and the crude product was purified via silica gel flash column chromatography with DCM/EA (20:1) as an eluent. The product was further purified by washing with a small amount of methanol (3 ml). The product was isolated as beige solid (74 mg, 97.2  $\mu\text{mol}$ , 68% yield).

$R_f$  (silica, DCM/EA (20:1)) = 0.18;  $^1\text{H NMR}$  ( $\text{CD}_2\text{Cl}_2$ , 500 MHz),  $\delta$  [ppm] = 1.36 (s, 18H), 1.66 (t, 2H,  $J = 6.1$  Hz), 2.41 (s, 6H), 4.38 (d, 4H,  $J = 6.1$  Hz), 7.28 (d, 4H,  $J = 8.0$  Hz), 7.69 (d, 4H,  $J = 8.0$  Hz), 8.02 (s, 2H), 8.08 (d, 2H,  $J = 1.5$  Hz), 8.18 (d, 2H,  $J = 1.5$  Hz);  $^{13}\text{C NMR}$  ( $\text{CD}_2\text{Cl}_2$ , 125 MHz) = 21.8 (q), 31.7 (q), 35.6 (s), 51.4 (t), 70.2 (d), 80.3 (s), 120.3 (d), 123.4 (s), 124.5 (d), 127.1 (s), 128.6 (d), 129.6 (d), 130.4 (d), 130.5 (s), 134.0 (s), 134.5 (s), 146.0 (s), 150.0 (s); FTIR (Neat)  $\nu$  [ $\text{cm}^{-1}$ ]: 3559, 2959, 2867, 2242, 1597, 1457, 1369, 1315, 1291, 1262, 1187, 1170, 1123, 1090, 1013, 976, 935, 861, 810, 703, 690, 665; HRMS-ESI pos (DCM/MeOH): calc for  $\text{C}_{44}\text{H}_{45}\text{N}_2\text{O}_6\text{S}_2$ : 761.2719, found: 761.2715; Mp:  $225\text{ }^{\circ}\text{C}$ .

**N,N'-(2,7-di-tert-butylpyrene-4,9-diyl)bis(N-(3-((tert-butyldimethylsilyl)oxy)prop-1-yn-1-yl)-4-methylbenzenesulfonamide) **9****

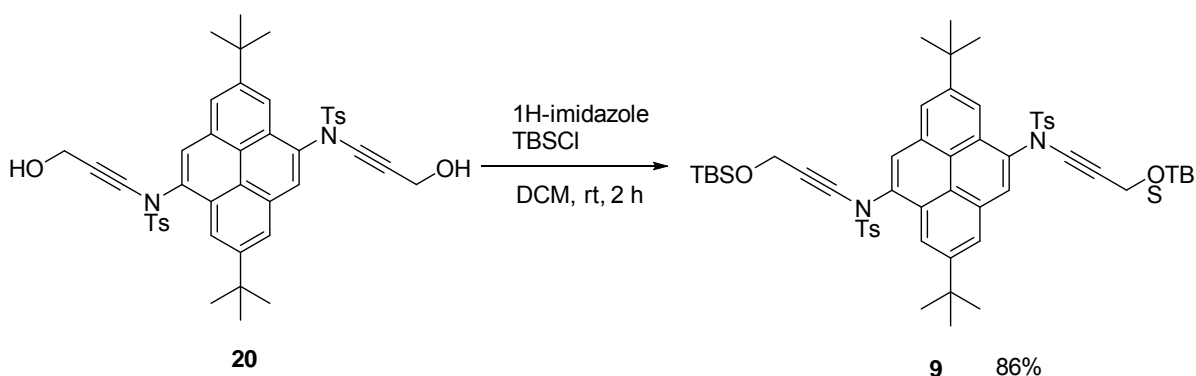

N,N'-(2,7-di-tert-butylpyrene-4,9-diyl)bis(N-(3-hydroxyprop-1-yn-1-yl)-4-methylbenzenesulfonamide) **20** (124 mg, 163  $\mu\text{mol}$ , 1.0 eq) was dissolved under nitrogen atmosphere in 7 ml DCM and 1H-imidazole (44 mg, 652  $\mu\text{mol}$ , 4.0 eq) and TBS-chloride (98 mg, 652  $\mu\text{mol}$ , 4.0 eq) were added. The reaction mixture was stirred at room temperature for 2 hours. Then 5 ml water was added and the layers were separated. The aqueous layer was extracted with DCM (3 x 10 ml) and the combined organic layer was washed with brine, dried over  $\text{Na}_2\text{SO}_4$  and filtered. The solvent was removed under reduced pressure and the product was purified via silica gel flash column chromatography with DCM (100 %) as an eluent. The product was then

## SUPPORTING INFORMATION

further purified by washing with a small amount of methanol (3 ml). The product was isolated as colourless solid (139 mg, 141  $\mu\text{mol}$ , 86% yield).

$R_f$  (silica, DCM) = 0.9;  $^1\text{H NMR}$  ( $\text{CDCl}_3$ , 700 MHz),  $\delta$  [ppm] = 0.07 (s, 12H), 0.87 (s, 18H), 1.39 (s, 18H), 2.44 (s, 6H), 4.46 (s, 4H), 7.28 (d, 4H,  $J$  = 6.9 Hz), 7.75 (d, 4H,  $J$  = 6.9 Hz), 8.01 (s, 2H), 8.13 (d, 2H,  $J$  = 1.6 Hz), 8.15 (d, 2H,  $J$  = 1.6 Hz);  $^{13}\text{C NMR}$  ( $\text{CDCl}_3$ , 176 MHz) = -5.0 (q), 18.4 (s), 21.8 (q), 26.0 (q), 31.7 (q), 35.4 (s), 52.0 (s), 69.8 (d), 79.2 (s), 120.1 (d), 123.8 (s), 124.1 (d), 127.1 (s), 128.6 (d), 129.3 (d), 130.0 (d), 130.1 (s), 133.9 (s), 134.6 (s), 145.1 (s), 149.5 (s); FTIR (Neat)  $\nu$  [ $\text{cm}^{-1}$ ]: 2956, 2930, 2858, 2235, 1609, 1596, 1471, 1461, 1369, 1318, 1261, 1174, 1069, 930, 913, 894, 832, 814, 777, 705, 689, 665; HRMS-DART pos: calc for  $\text{C}_{56}\text{H}_{73}\text{N}_2\text{O}_6\text{S}_2\text{Si}_2$ : 989.4449, found: 989.4321; Mp: 217  $^\circ\text{C}$ .

### 1.3. Gold-catalysed synthesis of quinolines

#### 1.3.1. General procedures for gold-catalysed synthesis of quinolines 4a-h and 10a-d

**GP.A:**  $\text{PicAuCl}_2$  **3** (5 mol %) was dissolved in DCE and anthranil **2** in DCE (1.5 eq) and Ynamide **1** (1.0 eq) were added (total concentration of ynamide: 0.2 M) and the reaction mixture was stirred at 65  $^\circ\text{C}$  for 4 hours. Then the solvent was reduced under reduced pressure and the crude product was purified via silica gel flash column chromatography. The product was further purified by washing with a small amount of methanol.

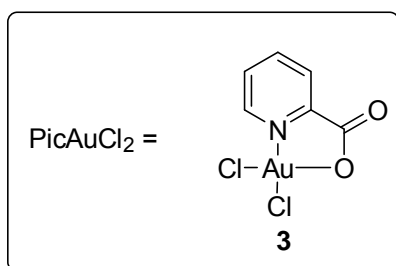

**GP.B:**  $\text{PicAuCl}_2$  **3** (5 mol %) was dissolved in DCE and anthranil **2** (1.5 eq) and Ynamide **1** (1.0 eq) were added (total concentration of ynamide: 0.2 M) and the reaction mixture was stirred at 65  $^\circ\text{C}$  for 4 hours. Then the solvent was reduced under reduced pressure and the crude product was purified via silica gel flash column chromatography. The product was further purified by washing with a small amount of methanol.

**GP.C:**  $\text{PicAuCl}_2$  **3** (15 mol %) was dissolved in DCE and anthranil **2a** or **2h-j** (4 eq) and Ynamide **10a-d** (1.0 eq) were added (total concentration of ynamide: 0.1 M) and the reaction mixture was stirred at 65  $^\circ\text{C}$  for 4 hours. Then the solvent was reduced under reduced pressure and the crude product was purified via silica gel flash column chromatography. The product was further purified by washing with a small amount of methanol.

#### 1.3.2. Gold-catalysed synthesis of 4a-g

**N-(3-formylquinolin-2-yl)-4-methyl-N-(phenanthren-9-yl)benzenesulfonamide 4a**

## SUPPORTING INFORMATION

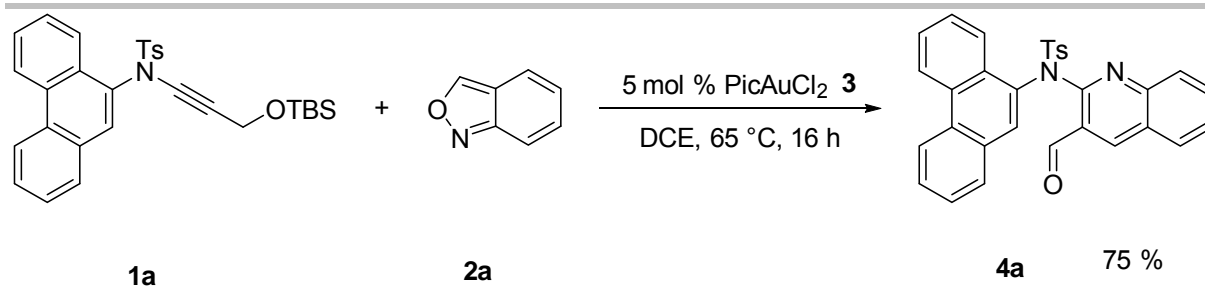

According to **G.P.A**: PicAuCl<sub>2</sub> **3** (9.5 mg, 24 μmol, 5 mol %) and anthranil **2a** (87 mg, 727 μmol, 1.5 eq) and N-(3-((tert-butyldimethylsilyloxy)prop-1-yn-1-yl)-4-methyl-N-(phenanthren-9-yl)benzenesulfonamide **1a** (250 mg, 485 μmol, 1.0 eq) were stirred at 65 °C for 4 hours in 2.4 ml DCE.

Silica gel flash column chromatography with DCM/PE (2:1) as an eluent.

Colourless solid (181 mg, 360 μmol, 74 % yield).

R<sub>f</sub> (silica, DCM/PE 2:1) = 0.28; <sup>1</sup>H NMR (500 MHz, CD<sub>2</sub>Cl<sub>2</sub>) δ (ppm) = 2.49 (s, 3H), 7.25 (d, *J* = 7.0 Hz, 2H), 7.49-7.63 (m, 4H), 7.66-7.73 (m, 4H), 7.77 (s, 1H), 7.78-7.84 (m, 1H), 7.95 (d, *J* = 8.7 Hz, 2H), 8.67 (d, *J* = 8.3 Hz, 1H), 8.68-8.75 (m, 2H), 8.78 (s, 1H), 11.02 (s, 1H); <sup>13</sup>C NMR (150 MHz, CD<sub>2</sub>Cl<sub>2</sub>): 21.9 (q), 123.0 (d), 123.3 (d), 125.3 (d), 127.0 (s), 127.4 (d), 127.5 (d), 127.6 (d), 127.8 (s), 128.4 (d), 128.5 (d), 129.1 (d), 129.5 (d), 129.6 (d), 129.7 (d), 130.1 (d), 130.8 (s), 131.1 (s), 131.3 (s), 131.8 (s), 132.3 (d), 133.0 (d), 134.4 (s), 135.0 (s), 140.2 (d), 145.3 (s), 148.7 (s), 152.8 (s), 189.1 (s); FTIR (Neat) ν [cm<sup>-1</sup>]: 3069, 2880, 1691, 1618, 1582, 1492, 1451, 1419, 1369, 1354, 1307, 1256, 1239, 1219, 1190, 1164, 1117, 1102, 1087, 1064, 1037, 1018, 978, 934, 913, 893, 866, 836, 814, 786, 757, 744, 722, 705, 668, 629, 607; HRMS-MALDI: Calc. for C<sub>31</sub>H<sub>23</sub>N<sub>2</sub>O<sub>3</sub>S<sup>+</sup>: 503.1429, found: 503.1424; Mp: 243 °C (decomp.)

#### N-(6-fluoro-3-formylquinolin-2-yl)-4-methyl-N-(phenanthren-9-yl)benzenesulfonamide **4b**

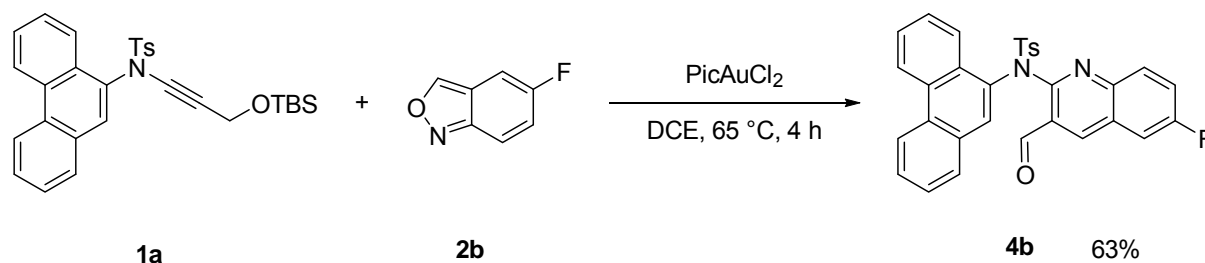

According to **GP.B**: PicAuCl<sub>2</sub> **3** (3.8 mg, 9.7 μmol, 5 mol %), anthranil **2b** (40 mg, 291 μmol, 1.5 eq) and N-(3-((tert-butyldimethylsilyloxy)prop-1-yn-1-yl)-4-methyl-N-(phenanthren-9-yl)benzenesulfonamide **1a** (100 mg, 194 μmol, 1.0 eq) were stirred at 65 °C for 4 hours in 1 ml DCE.

Silica gel flash column chromatography with DCM/PE (2:1) as an eluent.

Colourless solid (64 mg, 123 μmol, 63% yield).

R<sub>f</sub> (silica, DCM/PE 2:1) = 0.19; <sup>1</sup>H NMR (300 MHz, CDCl<sub>3</sub>) δ (ppm) = 2.49 (s, 3H), 7.25 (d, *J* = 6.7 Hz, 2H), 7.50-7.73 (m, 8H), 7.76 (s, 1H), 7.94 (dd, *J* = 10.1, 5.2 Hz, 1H), 8.62-8.86 (m, 4H), 11.03 (s, 1H); <sup>13</sup>C NMR (75 MHz, CDCl<sub>3</sub>): 21.9 (q), 112.2 (d), 112.5 (d), 122.8 (d), 122.8 (d), 123.1 (d), 123.1 (d), 124.9 (d), 127.1 (d), 127.4 (d), 127.4 (d), 128.2 (d), 129.2 (d), 129.3 (d), 130.0 (d), 130.7 (s), 130.8 (s), 131.0 (s), 131.4 (d), 131.6 (d), 131.6 (s), 131.9 (d), 134.1 (s), 134.9 (s), 139.2 (d), 139.3 (d), 144.7 (s), 145.6 (s), 152.3 (s), 161.2 (d, *J* = 251.3 Hz), 188.8 (d); IR (ATR): ν [cm<sup>-1</sup>] = 3066, 2890, 1695, 1625, 1592, 1564, 1494, 1449, 1387, 1357, 1342, 1305, 1251, 1232, 1218, 1207, 1185, 1163, 1148, 1128, 1111, 1101, 1088, 1060, 1040, 977, 964, 930, 896, 864, 847, 836, 817, 786, 745, 725, 667, 642, 626, 605; HRMS-DART pos: Calc. for C<sub>31</sub>H<sub>22</sub>FN<sub>2</sub>O<sub>3</sub>S<sup>+</sup>: 521.1330 m/z, found: 521.1303 m/z; mp: 215 °C (decomp.)

#### N-(6-chloro-3-formylquinolin-2-yl)-4-methyl-N-(phenanthren-9-yl)benzenesulfonamide **4c**

## SUPPORTING INFORMATION

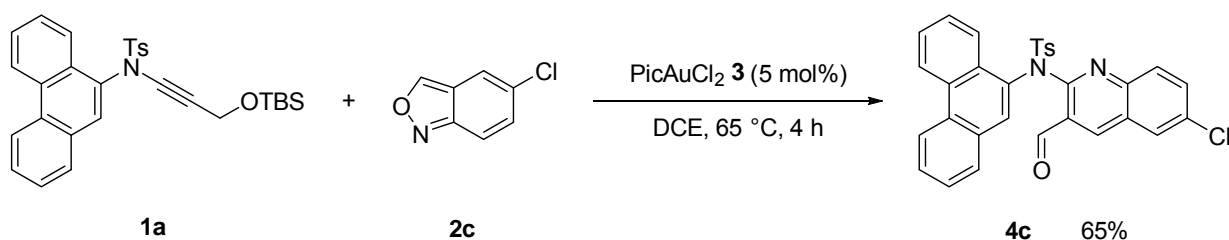

According to **GP.B**: PicAuCl<sub>2</sub> **3** (3.8 mg, 9.7 μmol, 5 mol %), anthranil **2c** (45 mg, 291 μmol, 1.5 eq) and N-(3-((tert-butylidimethylsilyloxy)prop-1-yn-1-yl)-4-methyl-N-(phenanthren-9-yl)benzenesulfonamide **1a** (100 mg, 194 μmol, 1.0 eq) were stirred at 65 °C for 4 hours in 1 ml DCE.

Silica gel flash column chromatography with DCM/PE (3:1) as an eluent.

Colourless solid (68 mg, 127 μmol, 65% yield).

R<sub>f</sub> (silica, DCM/PE 1:1.5) = 0.39; <sup>1</sup>H NMR (400 MHz, CDCl<sub>3</sub>) δ (ppm) = 2.49 (s, 3H), 7.25 (d, *J* = 8.6 Hz, 2H), 7.52-7.62 (m, 3H), 7.63-7.78 (m, 6H), 7.87 (d, *J* = 9.0 Hz, 1H), 7.92 (d, *J* = 2.3 Hz, 1H), 8.60-8.75 (m, 4H), 10.99 (s, 1H); <sup>13</sup>C NMR (100 MHz, CDCl<sub>3</sub>): 21.9 (q), 122.8 (d), 123.1 (d), 124.9 (d), 127.1 (d), 127.4 (d), 127.5 (d), 127.9 (d), 128.2 (d), 128.3 (s), 129.2 (d), 129.3 (d), 130.0 (d), 130.5 (d), 132.0 (d), 133.5 (d), 134.9 (s), 139.0 (d), 144.7 (s), 146.8 (s), 153.0 (s), 188.6 (d); FTIR (Neat) ν [cm<sup>-1</sup>]: 3277, 2963, 2906, 2872, 1594, 1494, 1464, 1444, 1419, 1379, 1337, 1282, 1258, 1189, 1165, 1109, 1085, 977, 892, 844, 834, 786, 752, 719, 696, 660, 631, 619; HRMS-DART: Calc. for C<sub>31</sub>H<sub>22</sub>N<sub>2</sub>O<sub>3</sub>SiCl<sup>+</sup>: 537.1034 m/z, found: 537.1039 m/z; mp: 229 °C (decomp.).

#### N-(6-bromo-3-formylquinolin-2-yl)-4-methyl-N-(phenanthren-9-yl)benzenesulfonamide **4d**

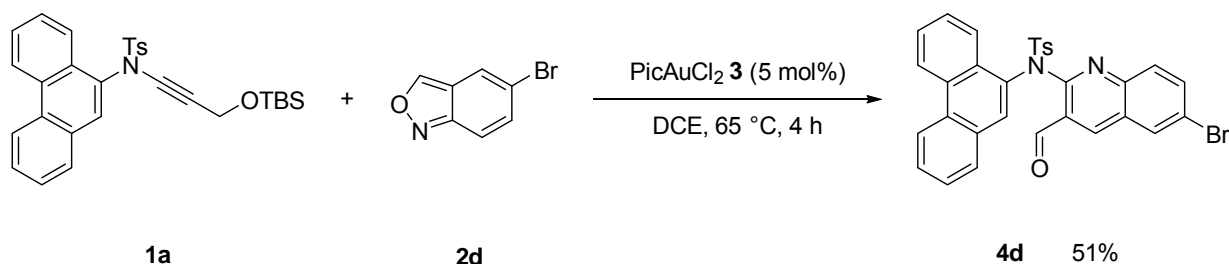

According to **GP.B**: PicAuCl<sub>2</sub> **3** (3.8 mg, 9.7 μmol, 5 mol %) and anthranil **2d** (58 mg, 291 μmol, 1.5 eq) in 1 ml DCE and N-(3-((tert-butylidimethylsilyloxy)prop-1-yn-1-yl)-4-methyl-N-(phenanthren-9-yl)benzenesulfonamide **1a** (100 mg, 194 μmol, 1.0 eq) were stirred at 65 °C for 4 hours in 1 ml DCE.

Silica gel flash column chromatography with DCM/PE (3:1) as an eluent.

Colourless solid (58 mg, 100 μmol, 51% yield).

R<sub>f</sub> (silica, DCM/PE 1.5:1) = 0.19; <sup>1</sup>H NMR (600 MHz, CDCl<sub>3</sub>) δ (ppm) = 2.49 (s, 3H), 7.25 (d, *J* = 8.0 Hz, 2H), 7.55 (d, *J* = 8.3 Hz, 2H), 7.58 (dt, *J* = 11.0, 4.0 Hz, 1H), 7.64-7.73 (m, 5H), 7.80 (d, *J* = 9.0 Hz, 1H), 7.86 (dd, *J* = 9.0, 2.1 Hz, 1H), 8.10 (d, *J* = 2.1 Hz, 1H), 8.62-8.73 (m, 4H), 10.98 (s, 1H); <sup>13</sup>C NMR (150 MHz, CDCl<sub>3</sub>): 21.9 (q), 122.0 (s), 122.8 (d), 123.1 (d), 124.9 (d), 127.1 (d), 127.4 (d), 127.5 (d), 129.2 (d), 129.3 (d), 130.0 (d), 130.5 (d), 131.3 (d), 134.1 (s), 134.8 (s), 136.0 (d), 138.9 (d), 144.7 (s), 147.0 (s), 153.0 (s), 188.6 (d); FTIR: ν [cm<sup>-1</sup>]: 3061, 2924, 2877, 1695, 1597, 1579, 1483, 1453, 1426, 1406, 1386, 1350, 1307, 1234, 1218, 1183, 1160, 1124, 1106, 1087, 1060, 1039, 1019, 976, 940, 926, 902, 854, 831, 814, 763, 745, 722, 693, 672, 645, 618; HRMS-DART: Calc. for C<sub>31</sub>H<sub>22</sub>N<sub>2</sub>O<sub>3</sub>SBr<sup>+</sup>: 583.0509 m/z, found: 583.0511 m/z; mp: 227 °C.

#### N-(3-formyl-6-methoxyquinolin-2-yl)-4-methyl-N-(phenanthren-9-yl)benzenesulfonamide **4e**

## SUPPORTING INFORMATION

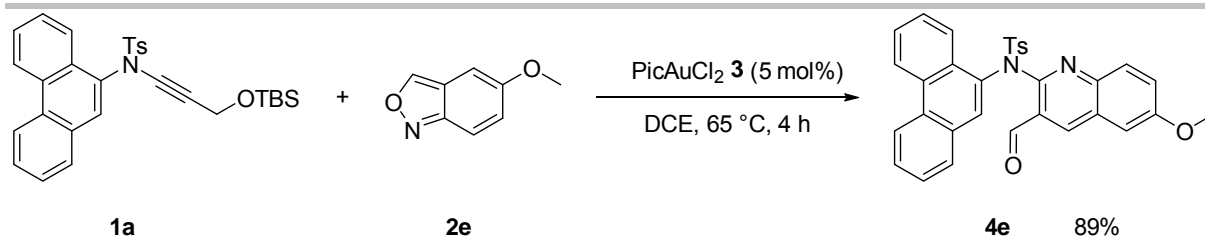

According to **GP.A**: PicAuCl<sub>2</sub> **3** (1.9 mg, 4.9 μmol, 5 mol %), anthranil **2e** (29 mg, 194 μmol, 2.0 eq), and N-(3-((tert-butyldimethylsilyloxy)prop-1-yn-1-yl)-4-methyl-N-(phenanthren-9-yl)benzenesulfonamide **1a** (50 mg, 97 μmol, 1.0 eq) were stirred at 65 °C for 4 hours in 1 ml DCE.

Silica gel flash column chromatography with DCM (100%) as an eluent.

Colourless solid (46 mg, 86 μmol, 89% yield).

R<sub>f</sub> (silica, DCM/PE 2:1) = 0.29; <sup>1</sup>H NMR (700 MHz, CDCl<sub>3</sub>) δ (ppm) = 2.49 (s, 3H), 3.93 (s, 3H), 7.17 (d, *J* = 2.5 Hz, 1H), 7.24 (d, *J* = 8.0 Hz, 2H), 7.44 (dd, *J* = 9.2, 2.6 Hz, 1H), 7.49-7.60 (m, 3H), 7.63-7.74 (m, 3H), 7.80-7.83 (m, 2H), 8.66 (d, *J* = 8.3 Hz, 1H), 7.68-7.72 (m, 2H), 8.73-8.76 (m, 1H), 11.10 (s, 1H); <sup>13</sup>C NMR (175 MHz, CDCl<sub>3</sub>): 21.9 (q), 55.9 (q), 106.1 (d), 122.8 (d), 123.0 (d), 125.1 (d), 125.8 (d), 127.0 (d), 127.3 (d), 127.4 (d), 127.8 (s), 128.1 (d), 129.1 (d), 129.3 (d), 130.0 (d), 130.4 (d), 130.6 (s), 130.9 (s), 131.1 (s), 131.6 (s), 131.7 (s), 134.3 (s), 134.9 (s), 138.2 (d), 144.5 (s), 144.8 (s), 150.8 (s), 159.0 (s), 189.5 (d); IR (ATR):  $\tilde{\nu}$  [cm<sup>-1</sup>] = 3061, 2968, 2917, 2838, 1682, 1621, 1582, 1497, 1452, 1425, 1375, 1351, 1305, 1249, 1225, 1196, 1163, 1125, 1104, 1088, 1064, 1037, 1021, 968, 937, 897, 843, 818, 785, 760, 745, 717, 672, 621, 609; HRMS-DART pos: Calc. for C<sub>32</sub>H<sub>25</sub>N<sub>2</sub>O<sub>4</sub>S<sup>+</sup>: 533.1530 m/z, found: 533.1531 m/z; mp: 217 °C (decomp.).

#### N-(3-formyl-7-(trifluoromethyl)quinolin-2-yl)-4-methyl-N-(phenanthren-9-yl)benzenesulfonamide **4f**

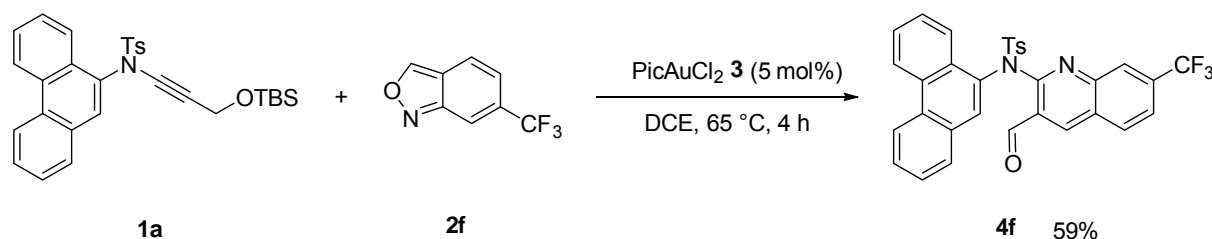

According to **GP.A**: PicAuCl<sub>2</sub> **3** (3.8 mg, 9.7 μmol, 5 mol %), anthranil **2f** (54 mg, 291 μmol, 1.5 eq) and N-(3-((tert-butyldimethylsilyloxy)prop-1-yn-1-yl)-4-methyl-N-(phenanthren-9-yl)benzenesulfonamide **1a** (100 mg, 194 μmol, 1.0 eq) were stirred at 65 °C for 4 hours in 1 ml DCE.

Silica gel flash column chromatography with DCM/PE (3:1) as an eluent.

Beige solid (65 mg, 114 μmol, 59% yield).

R<sub>f</sub> (silica, DCM/PE 3:1) = 0.33; <sup>1</sup>H NMR (500 MHz, CDCl<sub>3</sub>) δ (ppm) = 2.50 (s, 3H), 7.28 (d, *J* = 8.2 Hz, 2H), 7.57 (d, *J* = 8.3 Hz, 2H), 7.60 (d, *J* = 7.6 Hz, 1H), 7.66-7.75 (m, 5H), 7.77 (dd, *J* = 8.5, 1.2 Hz, 1H), 8.09 (d, *J* = 8.5 Hz, 1H), 8.20 (s, 1H), 8.58-8.65 (m, 1H), 8.68 (d, *J* = 8.3 Hz, 1H), 8.69-8.74 (m, 1H), 8.83 (s, 1H), 11.00 (s, 1H); <sup>13</sup>C NMR (125 MHz, CDCl<sub>3</sub>): 21.9 (q), 122.6 (s), 122.8 (d), 123.2 (d), 123.6 (q), 124.7 (d), 126.6 (q), 127.2 (d), 127.5 (d), 127.5 (d), 128.0 (s), 128.4 (d), 129.0 (s), 129.3 (d), 129.4 (d), 130.0 (d), 130.7 (d), 130.7 (s), 130.7 (s), 130.9 (s), 131.7 (s), 132.2 (d), 133.8 (s), 134.1 (s), 134.7 (s), 139.8 (d), 145.0 (s), 147.5 (s), 153.9 (s), 188.3 (d); <sup>19</sup>F-NMR (471 MHz, CDCl<sub>3</sub>): -62.96; IR (ATR):  $\tilde{\nu}$  [cm<sup>-1</sup>] = 1694, 1590, 1497, 1449, 1421, 1385, 1359, 1345, 1325, 1304, 1285, 1232, 1214, 1186, 1164, 1123, 1088, 1059, 1040, 973, 935, 897, 847, 816, 764, 726, 707, 672, 662, 614; HRMS-DART pos: Calc. for C<sub>32</sub>H<sub>22</sub>F<sub>3</sub>N<sub>2</sub>O<sub>3</sub>S<sup>+</sup>: 571.1298 m/z, found: 571.1277 m/z; mp: 227 °C (decomp.).

#### N-(3-formylbenzo[h]quinolin-2-yl)-4-methyl-N-(phenanthren-9-yl)benzenesulfonamide **4g**

## SUPPORTING INFORMATION

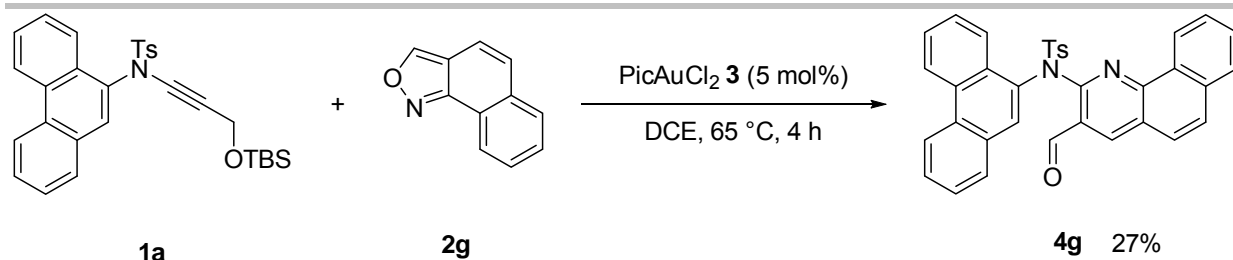

According to **GP.B**: PicAuCl<sub>2</sub> **3** (3.8 mg, 9.7 μmol, 5 mol %), anthranil **2g** (66 mg, 388 μmol, 2.0 eq) and N-(3-((tert-butyldimethylsilyloxy)prop-1-yn-1-yl)-4-methyl-N-(phenanthren-9-yl)benzenesulfonamide **1a** (100 mg, 194 μmol, 1.0 eq) were stirred at 65 °C for 4 hours in 1 ml DCE.

Silica gel flash column chromatography with DCM/PE (3:1) as an eluent.

Pale yellow solid (29 mg, 52 μmol, 27% yield).

R<sub>f</sub> (silica, DCM/PE 3:1) = 0.22; <sup>1</sup>H NMR (500 MHz, CDCl<sub>3</sub>) δ (ppm) = 2.52 (s, 3H), 7.25 (d, *J* = 8.0 Hz, 2H), 7.51 (d, *J* = 8.1 Hz, 2H), 7.60 (t, *J* = 7.4 Hz, 1H), 7.65-7.81 (m, 7H), 7.84 (d, *J* = 8.8 Hz, 1H), 7.90 (d, *J* = 7.9 Hz, 1H), 8.14 (s, 1H), 8.63 (d, *J* = 8.1 Hz, 1H), 8.67 (d, *J* = 8.3 Hz, 1H), 8.70 (d, *J* = 8.1 Hz, 1H), 8.80-8.90 (m, 2H), 11.34 (s, 1H); <sup>13</sup>C NMR (150 MHz, CDCl<sub>3</sub>): 21.9 (q), 122.8 (d), 123.0 (d), 125.0 (d), 125.4 (d), 125.4 (d), 125.7 (s), 127.1 (d), 127.3 (d), 127.4 (d), 127.5 (d), 128.1 (d), 128.3 (d), 128.6 (s), 129.3 (d), 129.4 (d), 129.7 (d), 129.8 (d), 129.9 (d), 130.6 (s), 130.7 (s), 130.9 (s), 131.2 (s), 131.8 (d), 134.0 (s), 134.7 (s), 134.9 (s), 138.7 (d), 144.5 (s), 148.0 (s), 152.2 (s), 189.4 (d); IR (ATR): ν̄ [cm<sup>-1</sup>] = 3055, 2888, 1687, 1583, 1483, 1451, 1404, 1357, 1305, 1261, 1226, 1213, 1186, 1161, 1133, 1107, 1086, 1066, 1040, 1020, 998, 961, 922, 896, 873, 836, 816, 801, 754, 730, 701, 665, 643, 617; HRMS-DART pos: Calc. for C<sub>35</sub>H<sub>25</sub>N<sub>2</sub>O<sub>3</sub>S<sup>+</sup>: 553.1580 m/z, found: 553.1556 m/z; mp: 259 °C (decomp.).

### 1.3.3. Gold-catalysed synthesis of quinolines 10a-d

**N,N'-(2,7-di-tert-butylpyrene-4,9-diyl)bis(N-(3-formylquinolin-2-yl)-4-methylbenzenesulfonamide) 10a**



## SUPPORTING INFORMATION

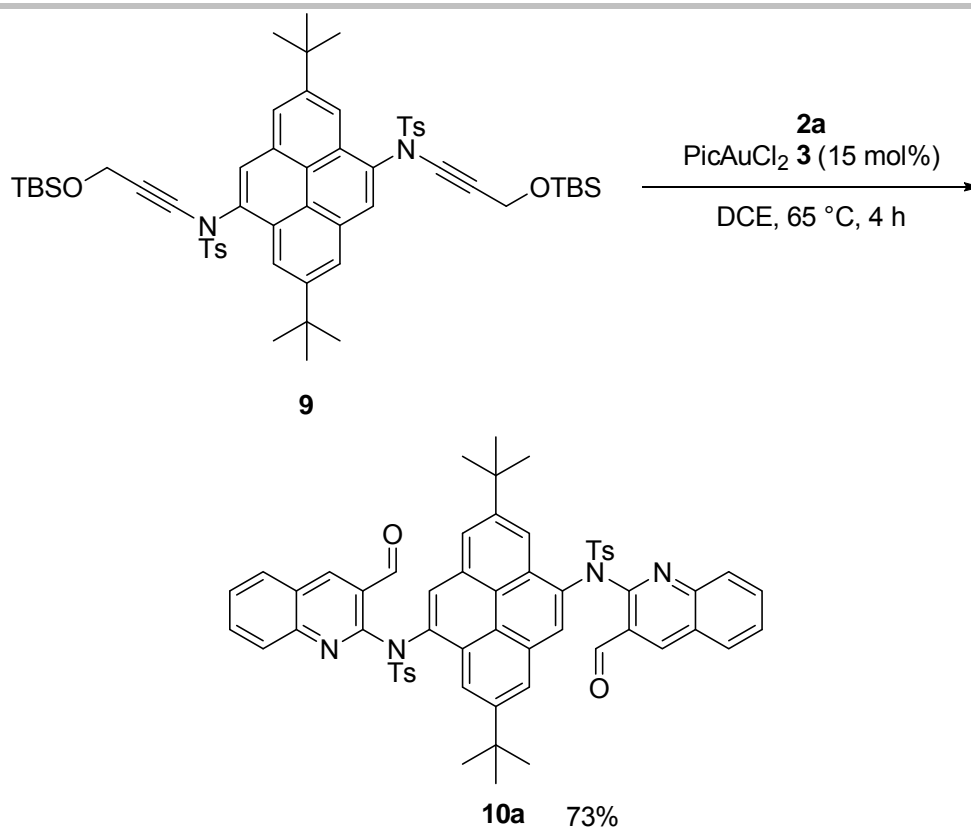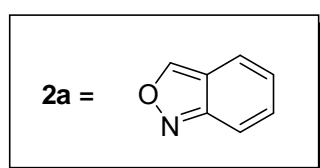

According to **GP.C**: PicAuCl<sub>2</sub> **3** (5.9 mg, 15.2 μmol, 15 mol %), anthranil **2a** (48 mg, 404 μmol, 4 eq), and N,N'-(2,7-di-tert-butylpyrene-4,9-diyl)bis(N-(3-((tert-butyldimethylsilyl)oxy)prop-1-yn-1-yl)-4-methylbenzenesulfonamide) **9** (100 mg, 101 μmol, 1.0 eq) were stirred at 65 °C for 4 hours in 1 ml DCE.

Silica gel flash column chromatography with DCM (100%) as an eluent.

beige solid (71 mg, 73.7 μmol, 73 % yield).

R<sub>f</sub> (silica, DCM) = 0.68; <sup>1</sup>H NMR (TCE-d<sub>2</sub>, 500 MHz, T = 100 °C), δ [ppm] = 1.26 (d, 18H, J = 1.3 Hz), 2.38 (s, 6H), 7.17 (d, 4H, J = 7.9 Hz), 7.57 (d, 2H, J = 7.2 Hz), 7.70 (d, 4H, J = 7.9 Hz), 7.79-7.85 (m, 2H), 7.88 (d, 2H, J = 8.0 Hz), 7.98-8.11 (m, 4H), 8.38 (s, 2H), 8.62 (s, 4H), 10.94 (s, 2H); <sup>13</sup>C NMR could not be measured due to low solubility; FTIR (Neat) ν [cm<sup>-1</sup>]: 3103, 2962, 2868, 1916, 1699, 1618, 1585, 1494, 1455, 1421, 1354, 1256, 1161, 1146, 1102, 1086, 1019, 982, 956, 934, 915, 871, 858, 814, 761, 707, 689, 664, 629; HRMS-DART pos (DCM): calc for C<sub>58</sub>H<sub>51</sub>N<sub>4</sub>O<sub>6</sub>S<sub>2</sub><sup>+</sup>: 963.3245, found: 963.3201; mp: >300 °C.

**N,N'-(2,7-di-tert-butylpyrene-4,9-diyl)bis(N-(3-formyl-6-pentylquinolin-2-yl)-4-methylbenzenesulfonamide) 10b**

## SUPPORTING INFORMATION

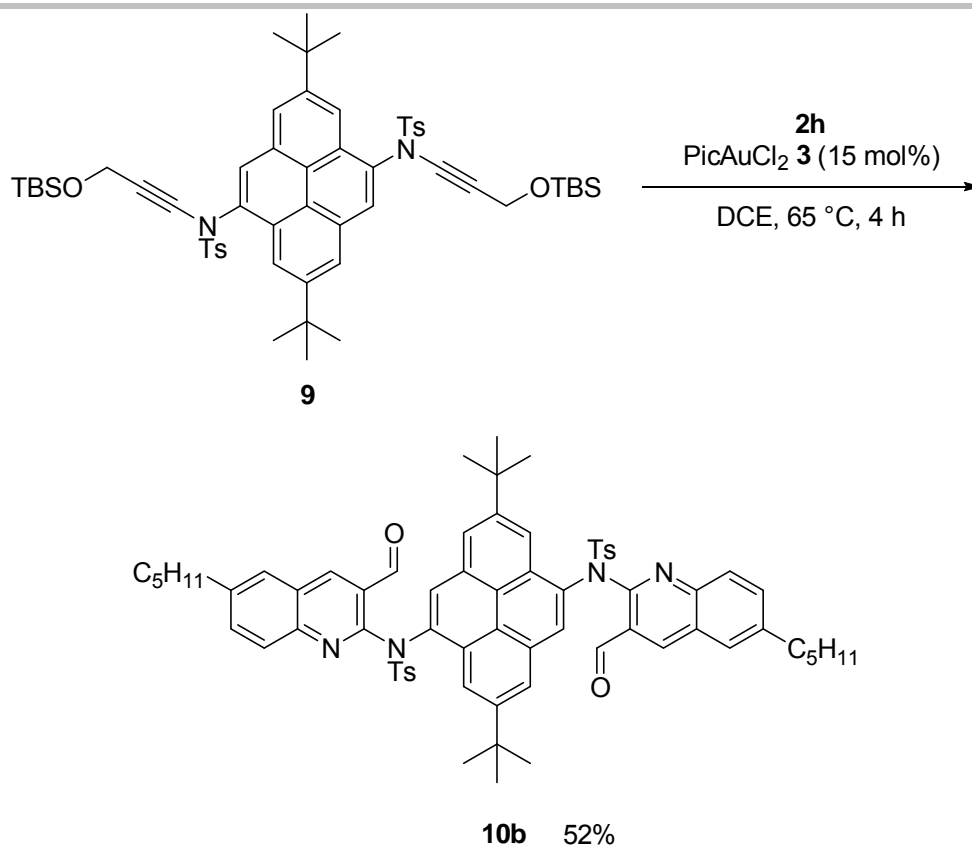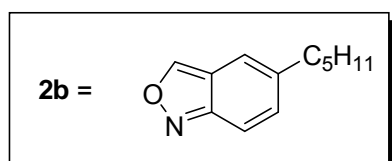

According to **GP.C**: PicAuCl<sub>2</sub> **3** (5.9 mg, 15 μmol, 15 mol %), anthranil **2h** (95 mg, 50.5 μmol, 5 eq), and N,N'-(2,7-di-tert-butylpyrene-4,9-diyl)bis(N-(3-((tert-butyldimethylsilyloxy)prop-1-yn-1-yl)-4-methylbenzenesulfonamide) **9** (100 mg, 101 μmol, 1.0 eq) were stirred at 65 °C for 4 hours in 1 ml DCE.

Silica gel flash column chromatography with DCM/PE (3:1) as an eluent.

Beige solid (58 mg, 52 μmol, 52 % yield).

R<sub>f</sub> (silica, DCM/PE (2:1)) = 0.07; <sup>1</sup>H NMR (CDCl<sub>3</sub>, 500 MHz), δ [ppm] = 0.88 (t, 6H, J = 6.7 Hz), 1.23 (s, 18H), 1.29-1.39 (m, 9H), 1.65-1.74 (m, 4H), 2.42 (s, 6H), 2.80 (t, 4H, J = 7.4 Hz), 7.20 (s, 4H), 7.66 (s, 2H), 7.71 (d, 2H, J = 8.6 Hz), 7.75 (d, 4H, J = 7.0 Hz), 8.00 (d, 2H, J = 8.7 Hz), 8.05 (s, 2H), 8.40 (s, 2H), 8.59 (s, 4H), 10.99 (s, 2H); <sup>13</sup>C NMR (CDCl<sub>3</sub>, 125 MHz) = 14.2 (q), 21.8 (q), 22.6 (t), 30.9 (t), 31.4 (t), 31.7 (q), 35.4 (s), 35.9 (t), 121.6 (d), 123.9 (s), 124.1 (d), 126.8 (s), 127.0 (s), 127.7 (d), 128.7 (d), 129.2 (d), 129.8 (d), 130.1 (s), 133.6 (d), 134.5 (d), 134.8 (s), 136.8 (s), 139.9 (d), 143.2 (s), 144.2 (s), 147.4 (s), 149.3 (s), 152.7 (s), 188.9 (d); FTIR (Neat) ν [cm<sup>-1</sup>]: 2957, 2928, 2861, 1694, 1584, 1495, 1442, 1360, 1260, 1165, 1114, 1089, 932, 811, 706, 689, 664; HRMS-ESI pos (DCM/MeOH): calc for C<sub>68</sub>H<sub>71</sub>N<sub>4</sub>O<sub>6</sub>S<sub>2</sub><sup>+</sup>: 1103.4810, found: 1103.4827; Mp: 171 °C (decomp.).

**N,N'-(2,7-di-tert-butylpyrene-4,9-diyl)bis(N-(3-formyl-6-octylquinolin-2-yl)-4-methylbenzenesulfonamide) 10c**

## SUPPORTING INFORMATION

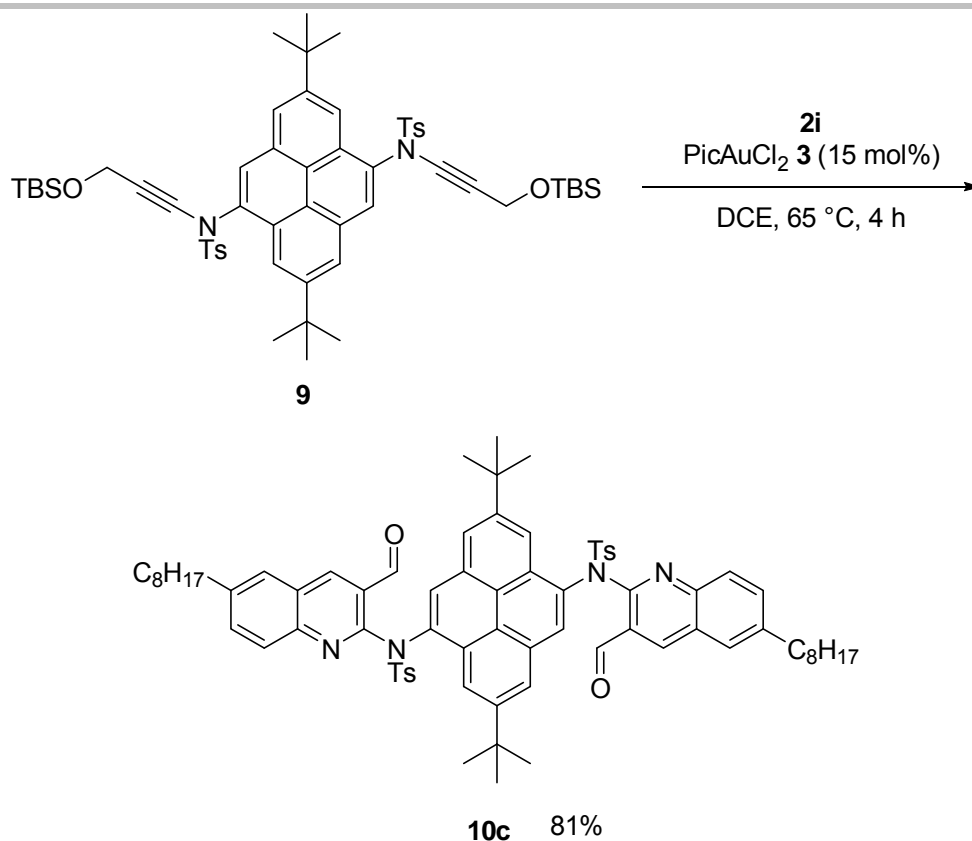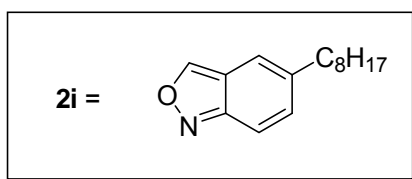

According to **GP.C**: PicAuCl<sub>2</sub> **3** (5.9 mg, 15 μmol, 15 mol %), anthranil **2i** (116 mg, 404 μmol, 4.0 eq), and N,N'-(2,7-di-tert-butylpyrene-4,9-diyl)bis(N-(3-((tert-butyldimethylsilyloxy)prop-1-yn-1-yl)-4-methylbenzenesulfonamide) **9** (100 mg, 101 μmol, 1.0 eq) were stirred at 65 °C for 4 hours in 1 ml DCE.

Silica gel flash column chromatography with DCM/PE (3:1) as an eluent.

Beige solid (97 mg, 82 μmol, 81% yield).

R<sub>f</sub> (silica, DCM) = 0,37; <sup>1</sup>H NMR (CDCl<sub>3</sub>, 300 MHz), δ [ppm] = 0.87 (t, 3H, J = 6.5 Hz), 1.15-1.40 (m, 38H), 1.63-1.76 (m, 4H), 2.42 (s, 6H), 2.80 (t, 4H, J = 7.5 Hz), 7.20 (d, 4H, J = 7.7 Hz), 7.61-7.84 (m, 8H), 7.99 (d, 2H, J = 8.6 Hz), 8.05 (d, 2H, J = 1.2 Hz), 8.40 (s, 2H), 8.60 (s, 2H), 10.99 (s, 2H); <sup>13</sup>C NMR (CDCl<sub>3</sub>, 125 MHz) = 14.2 (q), 21.7 (q), 22.8 (t), 29.3 (t), 29.4 (t), 29.6 (t), 31.2 (t), 31.7 (q), 32.0 (t), 35.4 (s), 36.0 (t), 121.6 (d), 123.9 (s), 124.1 (d), 126.9 (s), 127.2 (s), 127.7 (d), 128.7 (d), 128.7 (s), 129.2 (d), 129.8 (d), 130.2 (s), 133.7 (d), 134.5 (d), 134.8 (s), 136.9 (s), 139.9 (d), 143.2 (s), 144.2 (s), 147.4 (s), 149.3 (s), 152.7 (s), 188.9 (d); FTIR (Neat) ν [cm<sup>-1</sup>]: 2954, 2925, 2855, 1695, 1584, 1495, 1442, 1360, 1308, 1253, 1165, 1116, 1089, 1043, 964, 897, 836, 812, 706, 689, 664, 638; HRMS-ESI pos (DCM/MeOH): calc for C<sub>74</sub>H<sub>83</sub>N<sub>4</sub>O<sub>6</sub>S<sub>2</sub><sup>+</sup>: 1187.5749, found: 1187.5768; Mp: 142 °C.

**N,N'-(2,7-di-tert-butylpyrene-4,9-diyl)bis(N-(6-dodecyl-3-formylquinolin-2-yl)-4-methylbenzenesulfonamide) 10d**

## SUPPORTING INFORMATION

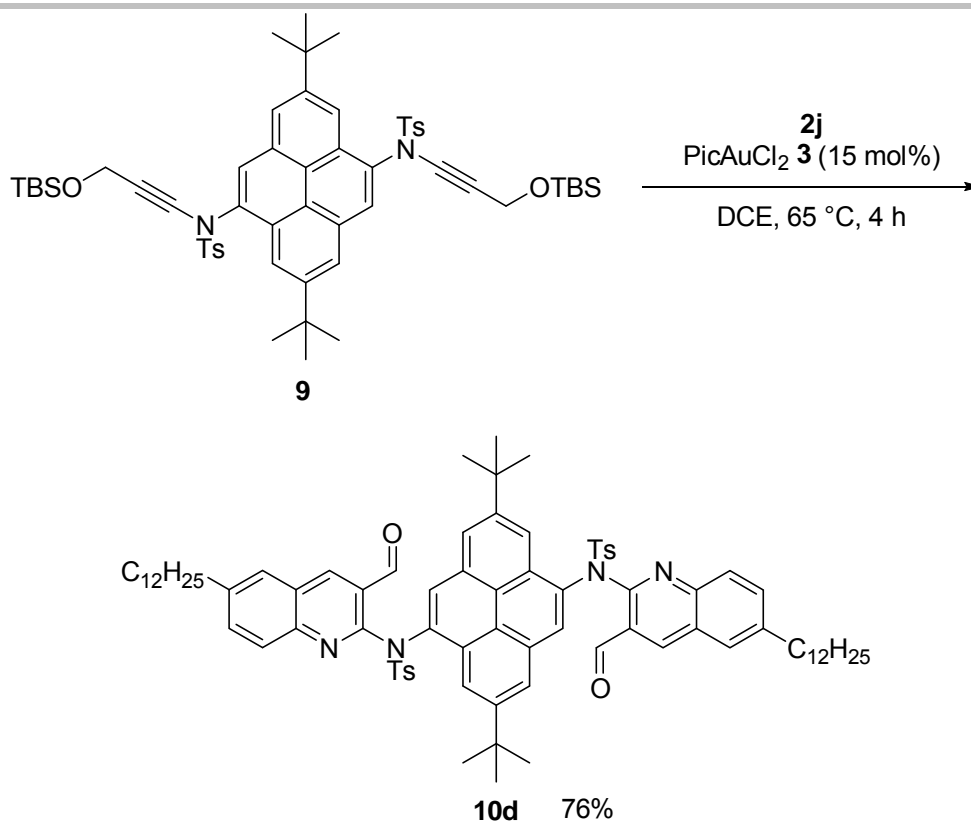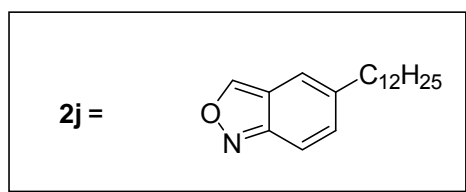

According to **GP.C**: PicAuCl<sub>2</sub> **3** (3.0 mg, 7.6 μmol, 15 mol %), and anthranil **2j** (58 mg, 202 μmol, 4.0 eq), and N,N'-(2,7-di-tert-butylpyrene-4,9-diyl)bis(N-(3-((tert-butyldimethylsilyloxy)prop-1-yn-1-yl)-4-methylbenzenesulfonamide) **9** (50 mg, 50.5 μmol, 1.0 eq) were stirred at 65 °C for 4 hours in 0.5 ml DCE.

Silica gel flash column chromatography with DCM (100%) as an eluent.

Brownish solid (50 mg, 38.5 μmol, 76% yield).

R<sub>f</sub> (silica, DCM) = 0,6; <sup>1</sup>H NMR (CD<sub>2</sub>Cl<sub>2</sub>, 500 MHz), δ [ppm] = 0.86 (t, 6H, *J* = 6.9 Hz), 1.25-1.32 (m, 54H), 1.68-1.71 (m, 4H), 2.42 (s, 6H), 2.80 (t, 4H, *J* = 7.6 Hz), 7.23 (d, 4H, *J* = 6.9 Hz), 7.63-7.84 (m, 8H), 7.99 (d, 2H, *J* = 8.7 Hz), 8.11 (s, 2H), 8.38 (s, 2H), 8.61 (s, 4H), 10.96 (s, 2H); <sup>13</sup>C NMR (CD<sub>2</sub>Cl<sub>2</sub>, 125 MHz) = 14.6 (q), 22.1 (q), 23.4 (t), 29.9 (t), 30.1 (t), 30.2 (t), 30.3 (t), 30.4 (t), 31.8 (t), 32.0 (q), 32.6 (t), 35.9 (t), 36.5 (t), 122.1 (d), 124.3 (s), 124.6 (d), 127.4 (s), 128,2 (d), 129.0 (d), 129.4 (s), 129.9 (d), 130.3 (d), 130.7 (s), 134.2 (d), 135.2 (d), 135.4 (s), 137.1 (s), 140.4 (d), 144.0 (s), 145.2 (s), 147.9 (s), 150.1 (s), 153.0 (s), 189.2 (d); FTIR (Neat) ν [cm<sup>-1</sup>]: 2953, 2924, 2853, 1659, 1584, 1495, 1442, 1360, 1253, 1165, 1089, 962, 812, 706, 689, 663; HRMS-ESI pos (DCM/MeOH): calc for C<sub>82</sub>H<sub>99</sub>N<sub>4</sub>O<sub>6</sub>S<sub>2</sub>: 1299.0000, found: 1299.0001; Mp: 149 °C.

#### 1.3.4. Gold-catalysed synthesis of quinoline 4h

**N**-(3-formylbenzo[h]quinolin-2-yl)-4-methyl-N-(naphthalen-2-yl)benzenesulfonamide **4h**

## SUPPORTING INFORMATION

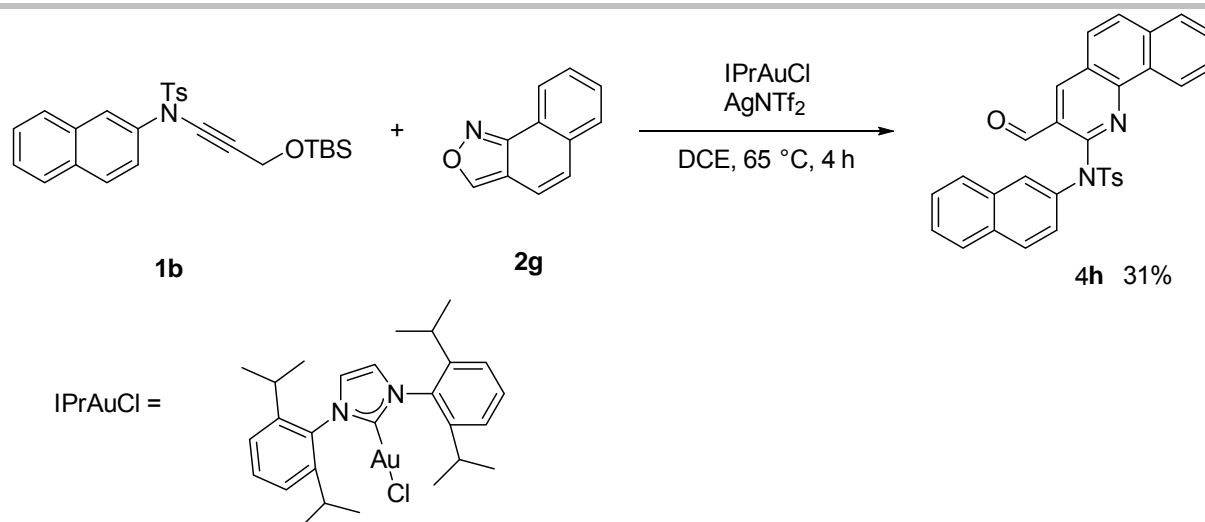

IPrAuCl (6.7 mg, 10.7  $\mu\text{mol}$ , 5 mol%) and AgNTf<sub>2</sub> (4.2 mg, 10.7  $\mu\text{mol}$ , 5 mol%) were stirred in 1.0 ml DCE for 5 min at room temperature until naphtho[1,2-c]isoxazole **2g** (55 mg, 322  $\mu\text{mol}$ , 1.5 eq) in 0.5 ml DCE and N-(3-((tert-butyldimethylsilyloxy)prop-1-yn-1-yl)-4-methyl-N-(naphthalen-2-yl)benzenesulfonamide **1b** (100 mg, 215  $\mu\text{mol}$ , 1.0 eq) in 0.5 ml DCE were added and the reaction mixture was stirred at 65 °C for 4 hours. Then, after cooling down to room temperature, the solvent was removed under reduced pressure and the crude product was purified via silica gel flash column chromatography with DCM (100%) as an eluent. The product was then further purified by washing with a small amount of methanol (1.5 ml). The product was isolated as beige solid (33 mg, 66  $\mu\text{mol}$ , 31% yield).

R<sub>f</sub>: 0.41 (silica, DCM (100%)); <sup>1</sup>H NMR (500 MHz, CDCl<sub>3</sub>)  $\delta$  (ppm) = 2.52 (s, 3H), 7.30 (d, *J* = 8.1 Hz, 2H), 7.41-7.54 (m, 2H), 7.61 (d, *J* = 8.2 Hz, 2H), 7.68-7.85 (m, 7H), 7.90 (d, *J* = 8.8 Hz, 1H), 7.96 (d, *J* = 7.9 Hz, 1H), 8.08 (s, 1H), 8.71 (d, *J* = 8.1 Hz, 1H), 8.80 (s, 1H), 10.95 (s, 1H); <sup>13</sup>C NMR (125 MHz, CDCl<sub>3</sub>) = 21.9 (q), 125.6 (d), 125.8 (d), 126.0 (s), 126.4 (d), 126.8 (d), 127.1 (d), 127.5 (d), 127.8 (d), 128.0 (s), 128.2 (d), 128.3 (d), 128.5 (d), 129.3 (d), 129.4 (d), 129.8 (d), 130.0 (d), 130.8 (s), 132.7 (s), 133.4 (s), 135.0 (s), 136.3 (s), 137.2 (s), 138.8 (d), 144.1 (s), 148.5 (s), 152.7 (s), 189.6 (d); IR (ATR):  $\tilde{\nu}$  [cm<sup>-1</sup>] = 3066, 2858, 1688, 1598, 1580, 1508, 1485, 1465, 1444, 1405, 1378, 1344, 1270, 1251, 1231, 1163, 1133, 1123, 1090, 986, 962, 932, 880, 857, 806, 751, 724, 711, 667, 647, 629, 608; HRMS-EI<sup>+</sup>: Calc. for C<sub>31</sub>H<sub>22</sub>N<sub>2</sub>O<sub>3</sub>S<sup>+</sup>: 502.1346 m/z, found: 502.1325 m/z; mp.: 201 °C.

#### 1.4. Synthesis of naphthyridine-based PAHs

##### 1.4.1. General procedure for condensation to phenanthronaphthyridines

**GP.D:** Quinoline **4a-h** (1.0 eq) was dissolved in DCM (1 ml per mg substance) and the solution as cooled to 0 °C. Then H<sub>2</sub>SO<sub>4</sub> (1 vol% of solvent) was added dropwise and the reaction mixture was stirred at 0 °C for 2 hours. Then 1.0 ml of ethylenediamine and 30 ml of a diluted K<sub>2</sub>CO<sub>3</sub> solution were added. The layers were separated and the aqueous layer was extracted with DCM (2 x 50 ml). The combined organic layer was washed with water (3 x 30 ml), dried over Na<sub>2</sub>SO<sub>4</sub>, and filtered. The solvent was removed under reduced pressure and the crude product was purified via recrystallization from CHCl<sub>3</sub>/hexane.

##### 1.4.2. Synthesis of naphthyridines 5a-h

###### benzo[b]phenanthro[9,10-g][1,8]naphthyridine 5a

## SUPPORTING INFORMATION

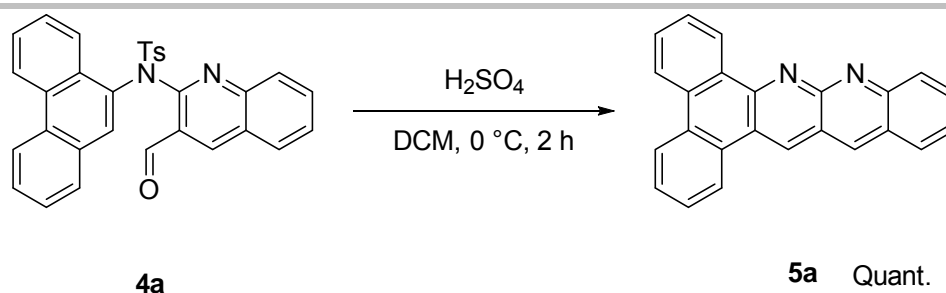

According to **GP.D**, N-(3-formylquinolin-2-yl)-4-methyl-N-(phenanthren-9-yl)benzenesulfonamide **1** (60 mg, 119  $\mu\text{mol}$ , 1.0 eq) and 0.6 ml  $\text{H}_2\text{SO}_4$  were stirred in 60 ml DCM.

The product was isolated as yellow solid (40 mg, 119  $\mu\text{mol}$ , quant, yield).

$^1\text{H}$  NMR (300 MHz,  $\text{CDCl}_3$ )  $\delta$  = 7.53-7.57 (m, 1H), 7.66 (pd, 2H,  $J$  = 7.1, 1.3 Hz), 7.71-7.7 (m, 1H), 7.77-7.82 (m, 1H), 7.82-7.88 (m, 1H), 8.05 (d,  $J$  = 8.4 Hz, 1H), 8.46 (d, 1H,  $J$  = 8.8 Hz), 8.49 (d, 1H,  $J$  = 7.9 Hz), 8.51-8.56 (m, 1H), 8.59-8.64 (m, 1H), 8.99 (s, 1H), 9.40 (s, 1H), 9.77 (dd, 1H,  $J$  = 8.0 Hz, 1.2 Hz);  $^{13}\text{C}$  NMR (150 MHz,  $\text{CDCl}_3$ , 50  $^\circ\text{C}$ ): 120.4 (s), 122.9 (d), 123.9 (d), 124.1 (d), 124.6 (s), 126.3 (d), 127.2 (s), 128.1 (d), 128.2 (d), 128.2 (s), 128.3 (s), 128.9 (d), 129.0 (s), 130.3 (d), 130.4 (s), 131.0 (d), 131.2 (s), 131.6 (d), 131.8 (d), 133.3 (s), 138.0 (d), 152.1 (s), 153.4 (s), 153.6 (s); FTIR (Neat)  $\nu$  [ $\text{cm}^{-1}$ ]: 3058, 3024, 2960, 2925, 2852, 1953, 1628, 1598, 1562, 1543, 1509, 1491, 1443, 1403, 1385, 1353, 1336, 1307, 1275, 1170, 1130, 1053, 1040, 962, 924, 854, 805, 774, 755, 744, 718, 694, 669, 612; UV/Vis [nm]: 251, 261, 275, 292, 303, 323, 373, 394, 414, 443; HRMS-DART: Calc. for  $\text{C}_{24}\text{H}_{15}\text{N}_2^+$ : 331.1230, found: 331.1229; mp:  $>300^\circ\text{C}$ .

**13-fluorobenzo[*b*]phenanthro[9,10-*g*][1,8]naphthyridine 5b**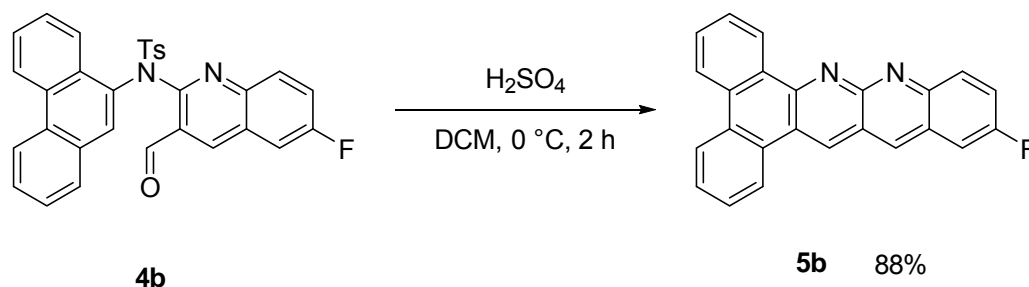

According to **GP.D**, N-(6-fluoro-3-formylquinolin-2-yl)-4-methyl-N-(phenanthren-9-yl)benzenesulfonamide **4b** (56 mg, 108  $\mu\text{mol}$ , 1.0 eq) and 0.56 ml  $\text{H}_2\text{SO}_4$  were stirred in 56 ml DCM.

Yellow solid (32 mg, 91  $\mu\text{mol}$ , 88% Yield).

$^1\text{H}$  NMR (600 MHz,  $\text{CDCl}_3$ , 50  $^\circ\text{C}$ )  $\delta$  (ppm) = 7.57 (dd,  $J$  = 8.7, 2.6 Hz, 1H), 7.60-7.69 (m, 3H), 7.71-7.77 (m, 1H), 7.77-7.82 (m, 1H), 8.43 (dd,  $J$  = 9.5, 5.4 Hz, 1H), 8.48 (d,  $J$  = 8.0 Hz, 1H), 8.51 (d,  $J$  = 7.8 Hz, 1H), 8.57 (d,  $J$  = 7.6 Hz, 1H), 8.87 (s, 1H), 9.31 (s, 1H), 9.73 (dd,  $J$  = 8.0, 1.0 Hz, 1H);  $^{13}\text{C}$  NMR (150 MHz,  $\text{CDCl}_3$ , 50  $^\circ\text{C}$ ): 109.5 (d), 109.6 (d), 120.6 (s), 122.9 (d), 123.4 (d), 123.6 (d), 123.9 (d), 124.2 (d), 125.0 (s), 128.1 (d), 128.1 (d), 128.2 (d), 128.7 (s), 129.2 (d), 130.4 (s), 131.2 (d), 131.3 (d), 133.0 (d), 133.1 (d), 133.2 (s), 136.9 (d), 137.0 (d), 149.4 (s), 153.1 (s), 153.3 (s), 160.2 (d,  $J$  = 251.3 Hz);  $^{19}\text{F}$ -NMR (470 MHz,  $\text{CDCl}_3$ , 50  $^\circ\text{C}$ ): -112.21; IR (ATR):  $\tilde{\nu}$  [ $\text{cm}^{-1}$ ] = 3058, 1915, 1832, 1756, 1638, 1595, 1562, 1545, 1510, 1484, 1463, 1440, 1399, 1377, 1334, 1305, 1288, 1249, 1228, 1193, 1174, 1140, 1129, 1114, 1039, 974, 953, 916, 887, 824, 802, 772, 751, 735, 719, 695, 656, 617; UV/Vis (6.2  $\mu\text{g/ml}$ ):  $\lambda$  [nm]: 251, 261, 278, 293, 304, 313, 375, 397, 418; HRMS-EI $^+$ : Calc. for  $\text{C}_{24}\text{H}_{13}\text{N}_2\text{F}^+$ : 348.1057 m/z, found: 348.1051 m/z; mp: 287  $^\circ\text{C}$  (decomp.).

**13-chlorobenzo[*b*]phenanthro[9,10-*g*][1,8]naphthyridine 5c**

## SUPPORTING INFORMATION

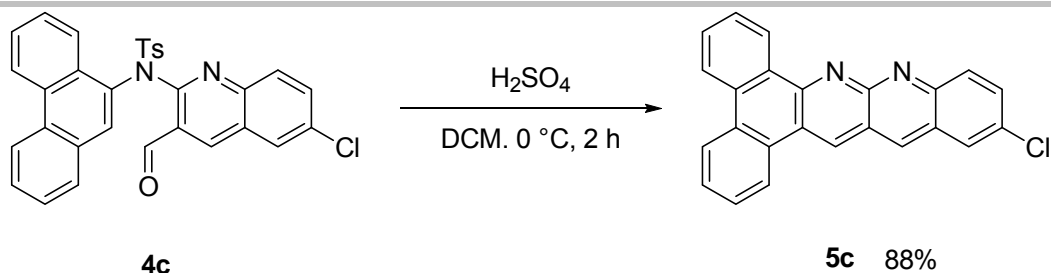

According to **GP.D**, N-(6-chloro-3-formylquinolin-2-yl)-4-methyl-N-(phenanthren-9-yl)benzenesulfonamide **4c** (30 mg, 56  $\mu\text{mol}$ , 1.0 eq) and 0.3 ml  $\text{H}_2\text{SO}_4$  were stirred in 30 ml DCM.

Yellow solid (18 mg, 49  $\mu\text{mol}$ , 88% yield).

$^1\text{H}$  NMR (600 MHz,  $\text{CDCl}_3$ , 50  $^\circ\text{C}$ )  $\delta$  (ppm) = 7.56-7.70 (m, 3H), 7.73 (t,  $J$  = 7.5 Hz, 1H), 7.76-7.82 (m, 1H), 7.85 (d,  $J$  = 1.9 Hz, 1H), 8.29 (d,  $J$  = 9.2 Hz, 1H), 8.39-8.57 (m, 3H), 8.71 (s, 1H), 9.19 (s, 1H), 9.69 (d,  $J$  = 7.9 Hz, 1H);  $^{13}\text{C}$  NMR (150 MHz,  $\text{CDCl}_3$ , 50  $^\circ\text{C}$ ): 120.5 (s), 122.9 (d), 123.9 (d), 124.1 (d), 124.8 (s), 126.1 (d), 127.0 (s), 128.1 (d), 128.2 (d), 128.5 (s), 129.2 (d), 130.3 (s), 130.7 (s), 131.4 (d), 131.5 (d), 131.8 (d), 132.1 (s), 132.7 (d), 133.3 (s), 136.8 (d), 150.1 (s), 153.4 (s), 153.5 (s); 0 (d, 1C), 124.7 (s, 1C), 124.0 (d, 1C), 123.7 (d, 1C), 122.8 (d, 1C), 120.4 (s, 1C); FTIR:  $\nu$  [ $\text{cm}^{-1}$ ]: 3428, 3065, 3051, 2983, 2360, 1927, 1790, 1738, 1708, 1622, 1598, 1562, 1543, 1509, 1487, 1446, 1433, 1401, 1380, 1338, 1305, 1280, 1249, 1229, 1163, 1133, 1108, 1067, 1040, 968, 931, 882, 855, 823, 803, 787, 773, 749, 730, 718, 694, 639, 618; UV/Vis (9.0  $\mu\text{g/ml}$ ):  $\lambda$  [nm]: 446, 421, 399, 379, 305, 294, 280, 251; HRMS-DART: Calc. for  $\text{C}_{24}\text{H}_{14}\text{N}_2\text{Cl}^+$ : 365.0840 m/z, found: 365.0837 m/z; mp: > 300  $^\circ\text{C}$ .

**13-bromobenzo[b]phenanthro[9,10-g][1,8]naphthyridine 5d**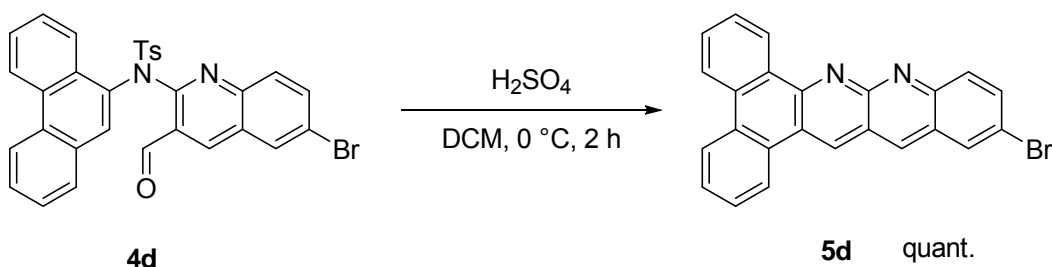

According to **GP.D**, N-(6-bromo-3-formylquinolin-2-yl)-4-methyl-N-(phenanthren-9-yl)benzenesulfonamide **4d** (30 mg, 51  $\mu\text{mol}$ , 1.0 eq) and 0.3 ml  $\text{H}_2\text{SO}_4$  were stirred in 30 ml DCM.

Yellow solid (21 mg, 51  $\mu\text{mol}$ , quant. Yield).

$^1\text{H}$  NMR (400 MHz,  $\text{CDCl}_3$ , 50  $^\circ\text{C}$ )  $\delta$  (ppm) = 7.56-7.70 (m, 2H), 7.70-7.87 (m, 3H), 8.10 (d,  $J$  = 2.1 Hz, 1H), 8.25 (d,  $J$  = 9.3 Hz, 1H), 8.40-8.60 (m, 3H), 8.77 (s, 1H), 9.26 (s, 1H), 9.71 (dd,  $J$  = 8.0, 1.4 Hz, 1H);  $^{13}\text{C}$  NMR (150 MHz,  $\text{CDCl}_3$ , 50  $^\circ\text{C}$ ): 120.4 (s), 120.5 (s), 123.0 (d), 123.9 (d), 124.2 (d), 125.0 (s), 127.6 (s), 128.1 (d), 128.2 (d), 128.6 (s), 129.2 (d), 129.7 (d), 130.4 (s), 130.8 (s), 131.4 (d), 131.5 (d), 131.8 (d), 133.3 (s), 135.1 (d), 136.8 (d), 150.2 (s), 153.5 (s), 153.7 (s); IR (ATR):  $\tilde{\nu}$  [ $\text{cm}^{-1}$ ] = 3517, 3065, 1663, 1618, 1592, 1562, 1542, 1508, 1484, 1431, 1399, 1383, 1336, 1306, 1269, 1252, 1230, 1163, 1132, 1050, 924, 880, 822, 773, 750, 718, 695, 683, 618; UV/Vis (3.2  $\mu\text{g/ml}$ ):  $\lambda$  [nm]: 447, 422, 400, 380, 315, 306, 294, 280, 260, 251; HRMS-DART: Calc. for  $\text{C}_{24}\text{H}_{14}\text{N}_2\text{Br}^+$ : 409.0335 m/z, found: 409.0333 m/z; mp: > 300  $^\circ\text{C}$ .

**13-methoxybenzo[b]phenanthro[9,10-g][1,8]naphthyridine 5e**

## SUPPORTING INFORMATION

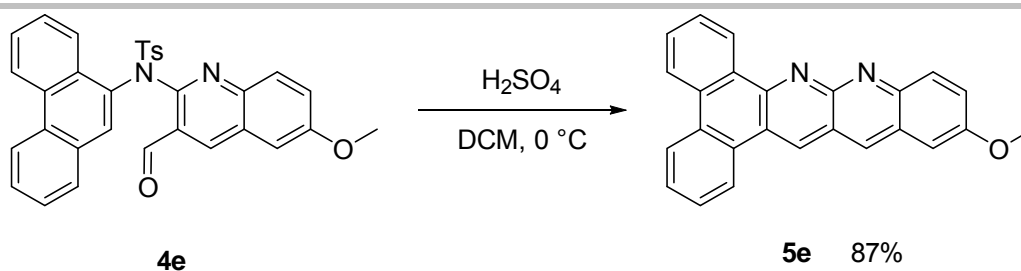

According to **GP.D**, N-(3-formyl-6-methoxyquinolin-2-yl)-4-methyl-N-(phenanthren-9-yl)benzenesulfonamide **4e** (36 mg, 68  $\mu\text{mol}$ , 1.0 eq) and 0.36 ml  $\text{H}_2\text{SO}_4$  were stirred in 36 ml DCM.

Yellow solid (21 mg, 59  $\mu\text{mol}$ , 87% Yield).

$^1\text{H}$  NMR (400 MHz,  $\text{CDCl}_3$ , 50  $^\circ\text{C}$ )  $\delta$  (ppm) = 3.87 (s, 3H), 6.90 (d,  $J$  = 2.6 Hz, 1H), 7.37 (dd,  $J$  = 9.5, 2.7 Hz, 1H), 7.49-7.61 (m, 2H), 7.65-7.78 (m, 2H), 8.21 (d,  $J$  = 9.5 Hz, 1H), 8.32-8.43 (m, 3H), 8.46 (s, 1H), 8.99 (s, 1H), 9.64-9.73 (m, 1H);  $^{13}\text{C}$  NMR (150 MHz,  $\text{CDCl}_3$ , 50  $^\circ\text{C}$ ): 55.6 (q), 102.8 (d), 120.3 (s), 122.8 (d), 123.7 (d), 124.0 (d), 124.2 (s), 126.9 (d), 127.8 (d), 127.9 (d), 128.7 (d), 128.8 (s), 130.1 (s), 130.7 (d), 130.8 (d), 131.1 (s), 131.5 (d), 132.9 (s), 134.8 (d), 149.3 (s), 151.9 (s), 152.3 (s), 157.4 (s); IR (ATR):  $\tilde{\nu}$  [ $\text{cm}^{-1}$ ] = 3070, 3033, 3006, 2942, 2915, 2830, 1969, 1837, 1631, 1595, 1561, 1548, 1511, 1484, 1469, 1455, 1437, 1407, 1379, 1306, 1289, 1254, 1231, 1213, 1213, 1192, 1181, 1122, 1040, 1024, 947, 918, 889, 864, 815, 773, 754, 722, 695, 654, 615; HRMS-EI+: Calc. for  $\text{C}_{25}\text{H}_{16}\text{N}_2\text{O}^+$ : 360.1257 m/z, found: 360.1254 m/z; mp: 246  $^\circ\text{C}$  (decomp.).

#### 12-(trifluoromethyl)benzo[b]phenanthro[9,10-g][1,8]naphthyridine **5f**

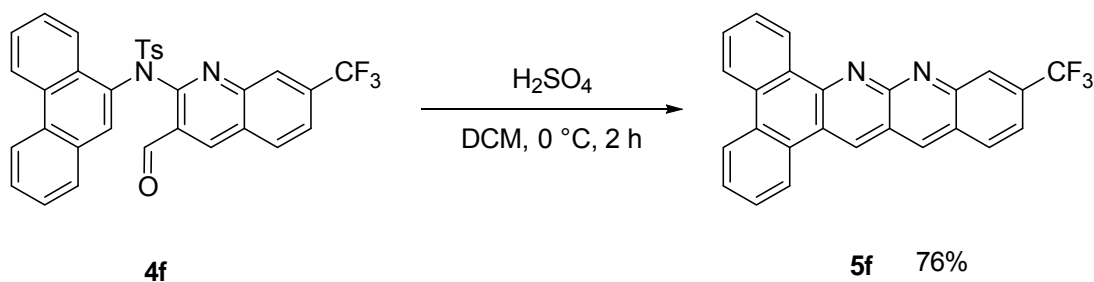

According to **GP.D**, N-(3-formyl-7-(trifluoromethyl)quinolin-2-yl)-4-methyl-N-(phenanthren-9-yl)benzenesulfonamide **4f** (45 mg, 79  $\mu\text{mol}$ , 1.0 eq) and 0.45 ml  $\text{H}_2\text{SO}_4$  were stirred in 45 ml DCM.

Yellow solid (24 mg, 60  $\mu\text{mol}$ , 76% Yield).

$^1\text{H}$  NMR (500 MHz,  $\text{TCE-d}_2$ , 100  $^\circ\text{C}$ )  $\delta$  (ppm) = 7.42-7.98 (m, 5H), 8.07 (d,  $J$  = 8.6 Hz, 1H), 8.35-8.63 (m, 3H), 8.67 (s, 1H), 8.91 (s, 1H), 9.24 (s, 1H), 9.60 (d,  $J$  = 7.6 Hz, 1H);  $^{13}\text{C}$  NMR (125 MHz,  $\text{TCE-d}_2$ , 100  $^\circ\text{C}$ ): 121.3 (d), 121.4 (d), 123.1 (d), 124.0 (d), 124.3 (d), 125.2 (s), 125.4 (s), 127.5 (s), 128.3 (d), 128.3 (d), 128.3 (d), 128.6 (s), 129.5 (d), 129.7 (d), 130.5 (s), 130.8 (s), 131.5 (d), 131.7 (d), 132.8 (s), 133.1 (s), 133.5 (s), 138.1 (d), 150.5 (s), 154.0 (s), 154.2 (s);  $^{19}\text{F}$  NMR (471 MHz,  $\text{TCE-d}_2$ , 100  $^\circ\text{C}$ ): -62.88; IR (ATR):  $\tilde{\nu}$  [ $\text{cm}^{-1}$ ] = 3035, 1644, 1593, 1543, 1509, 1494, 1473, 1453, 1431, 1401, 1385, 1331, 1294, 1271, 1233, 1168, 1142, 1103, 1047, 972, 941, 918, 890, 806, 786, 759, 743, 720, 696, 679, 659, 617; UV/Vis (6.4  $\mu\text{g/ml}$ ):  $\lambda$  [nm]: 252, 260, 292, 305, 314, 378, 399, 421; HRMS-EI+: Calc. for  $\text{C}_{25}\text{H}_{13}\text{F}_3\text{N}_2^+$ : 398.1025 m/z, found: 398.1036 m/z; mp: >300  $^\circ\text{C}$ .

#### naphtho[1,2-b]phenanthro[9,10-g][1,8]naphthyridine **5g**



## SUPPORTING INFORMATION

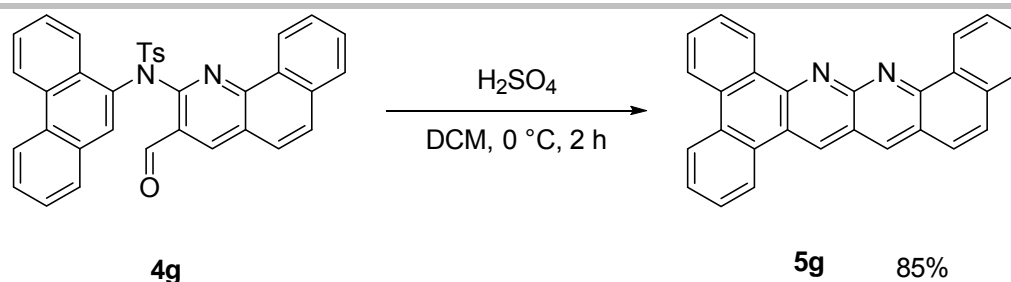

According to **GP.D**, N-(3-formylbenzo[h]quinolin-2-yl)-4-methyl-N-(phenanthren-9-yl)benzenesulfonamide **4g** (26 mg, 47  $\mu\text{mol}$ , 1.0 eq) and 0.26 ml  $\text{H}_2\text{SO}_4$  were stirred in 26 ml DCM.

Yellow solid (15 mg, 39.5  $\mu\text{mol}$ , 85% Yield).

$^1\text{H}$  NMR (500 MHz,  $\text{TCE-d}_2$ , 100  $^\circ\text{C}$ )  $\delta$  (ppm) = 7.46-8.06 (m, 9H), 8.41-8.59 (m, 2H), 8.59-8.70 (m, 1H), 8.80 (s, 1H), 9.38 (s, 1H), 9.64-9.78 (m, 2H);  $^{13}\text{C}$  NMR (125 MHz,  $\text{TCE-d}_2$ , 100  $^\circ\text{C}$ ): 120.9 (s), 123.1 (d), 124.0 (d), 124.2 (d), 124.5 (s), 125.5 (d), 126.1 (s), 126.7 (d), 127.8 (d), 127.9 (d), 128.2 (d), 128.2 (d), 128.3 (d), 128.6 (d), 129.0 (d), 129.1 (s), 130.3 (d), 130.4 (s), 130.9 (d), 131.3 (s), 131.5 (d), 133.1 (s), 134.7 (s), 136.5 (d), 151.7 (s), 152.0 (s), 153.3 (s); IR (ATR):  $\tilde{\nu}$  [ $\text{cm}^{-1}$ ] = 3266, 3031, 2926, 2853, 1626, 1595, 1551, 1522, 1491, 1457, 1420, 1397, 1378, 1345, 1301, 1231, 1171, 1132, 1040, 1011, 957, 918, 894, 879, 852, 794, 747, 717, 693, 675, 663, 618, 606; UV/Vis (15  $\mu\text{g/ml}$ ):  $\lambda$  [nm]: 252, 274, 306, 318, 412, 436; HRMS-EI+: Calc. for  $\text{C}_{28}\text{H}_{16}\text{N}_2^+$ : 380.1308 m/z, found: 380.1301 m/z; mp:  $>300$   $^\circ\text{C}$ .

**dinaphtho[1,2-b:1',2'-g][1,8]naphthyridine 5h**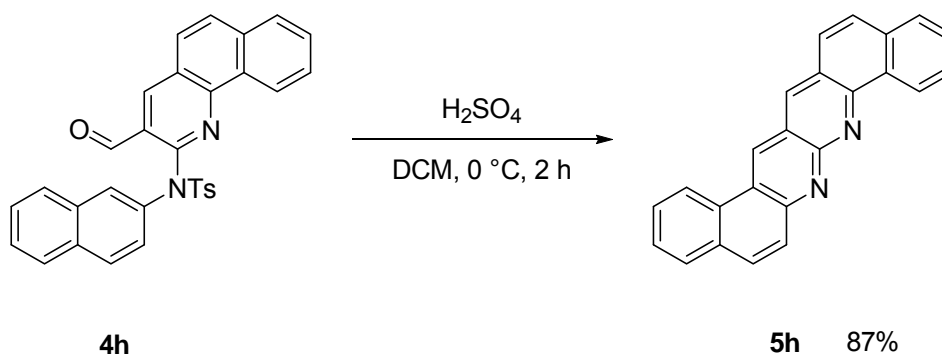

According to **GP.D**, N-(3-formylbenzo[h]quinolin-2-yl)-4-methyl-N-(naphthalen-2-yl)benzenesulfonamide **4h** (33 mg, 66  $\mu\text{mol}$ , 1.0 eq) and 0.33 ml  $\text{H}_2\text{SO}_4$  were stirred in 33 ml DCM.

Yellow solid (19 mg, 58  $\mu\text{mol}$ , 87% Yield).

$^1\text{H}$  NMR (600 MHz,  $\text{CDCl}_3$ , 50  $^\circ\text{C}$ )  $\delta$  (ppm) = 7.52-7.73 (m, 4H), 7.73-7.83 (m, 3H), 7.86 (d,  $J$  = 7.6 Hz, 1H), 7.99 (d,  $J$  = 9.3 Hz, 1H), 8.21 (d,  $J$  = 9.2 Hz, 1H), 8.68 (d,  $J$  = 8.0 Hz, 1H), 8.79 (s, 1H), 9.49 (s, 1H), 9.76 (d,  $J$  = 7.7 Hz, 1H);  $^{13}\text{C}$  NMR (125 MHz,  $\text{CDCl}_3$ , 50  $^\circ\text{C}$ ) = 120.0 (s), 123.3 (d), 124.8 (s), 125.3 (d), 125.9 (s), 126.9 (d), 127.7 (d), 128.0 (d), 128.1 (d), 128.3 (d), 128.6 (d), 129.1 (d), 129.3 (d), 129.9 (s), 130.3 (d), 131.4 (s), 131.8 (d), 134.4 (d), 134.5 (s), 136.5 (d), 152.1 (s), 153.0 (s), 153.3 (s); IR (ATR):  $\tilde{\nu}$  [ $\text{cm}^{-1}$ ] = 3050, 1605, 1592, 1551, 1513, 1493, 1478, 1458, 1428, 1406, 1376, 1338, 1315, 1300, 1273, 1244, 1168, 1147, 1113, 1039, 1016, 984, 923, 896, 875, 861, 829, 803, 774, 738, 720, 701, 627, 607; UV/Vis (DCM, 29.6  $\mu\text{g/ml}$ ):  $\lambda$  [nm]: 240, 265, 302, 314, 407, 425, 446; HRMS-EI+: Calc. for  $\text{C}_{24}\text{H}_{14}\text{N}_2^+$ : 330.1152 m/z, found: 330.1142 m/z; mp.:  $>300$   $^\circ\text{C}$ .

**1.4.3. Synthesis of Dinaphthyridinopyrenes 11a-d****Compound 11a**

## SUPPORTING INFORMATION

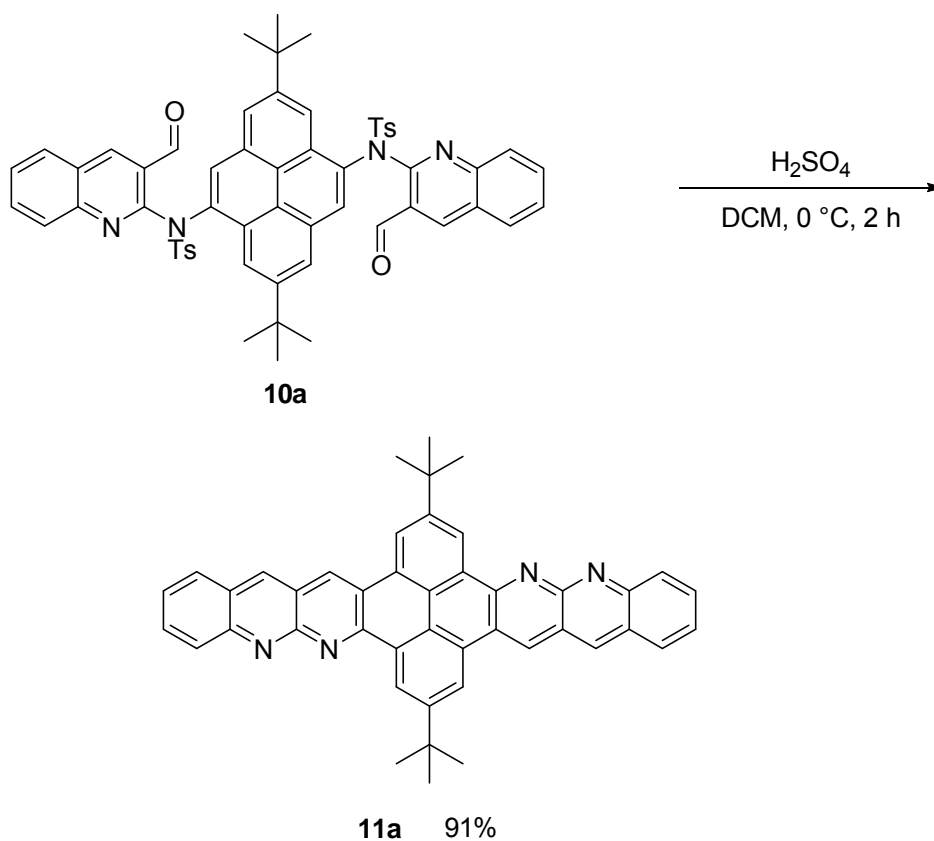

N,N'-(2,7-di-tert-butylpyrene-4,9-diyl)bis(N-(3-formylquinolin-2-yl)-4-methylbenzenesulfonamide) **10a** (139 mg, 144  $\mu\text{mol}$ , 1.0 eq) was dissolved in 300 ml DCM and the solution was cooled to 0  $^{\circ}\text{C}$ . Then  $\text{H}_2\text{SO}_4$  (3.0 ml, 1 vol% of solvent) was added dropwise and the reaction mixture was stirred at 0  $^{\circ}\text{C}$  for 2 hours. Then 5.0 ml ethylenediamine was added dropwise to quench the reaction and 150 ml of a diluted  $\text{K}_2\text{CO}_3$  solution was added afterwards. Then DCM was removed under reduced pressure and the suspension was filtered. The solid was washed with water, methanol, triethylamine and again methanol. The yellow product was then further purified via recrystallization from  $\text{CHCl}_3$ . The product was isolated as yellow solid (81 mg, 132  $\mu\text{mol}$ , 91% yield).

$^1\text{H}$  NMR and  $^{13}\text{C}$  NMR could not be measured due to low solubility; FTIR (Neat)  $\nu$  [ $\text{cm}^{-1}$ ]: 3051, 2961, 2926, 2867, 1612, 1593, 1538, 1478, 1455, 1428, 1395, 1372, 1318, 1284, 1255, 1232, 1170, 1126, 1001, 913, 880, 869, 849, 800, 788, 746, 737, 644, 617; UV/Vis ( $\text{CHCl}_3$ , 0.0044 mg/ml, [nm]): 260, 287, 324, 339, 424, 443; HRMS-MALDIposPVP: calc for  $\text{C}_{44}\text{H}_{35}\text{N}_4^+$ : 619.2856, found: 619.2856; mp: > 300  $^{\circ}\text{C}$ .

**Compound 11b**

## SUPPORTING INFORMATION

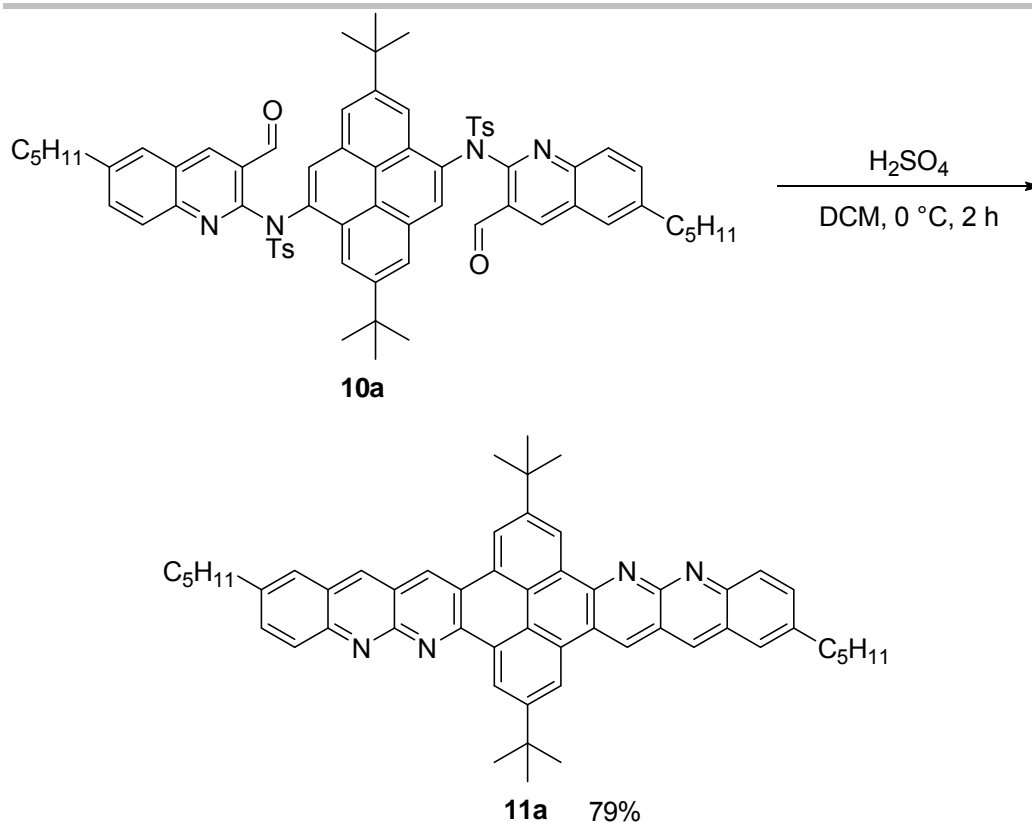

N,N'-(2,7-di-tert-butylpyrene-4,9-diyl)bis(N-(3-formyl-6-pentylquinolin-2-yl)-4-methylbenzene-sulfonamide) **10b** (50 mg, 45  $\mu\text{mol}$ , 1.0 eq) was dissolved in 50 ml DCM and the solution was cooled to 0  $^\circ\text{C}$ . Then  $\text{H}_2\text{SO}_4$  (0.5 ml, 1 vol% of solvent) was added dropwise and the reaction mixture was stirred at 0  $^\circ\text{C}$  for 2 hours. Then 0.5 ml ethylenediamine was added dropwise to quench the reaction and 20 ml of a diluted  $\text{K}_2\text{CO}_3$  solution was added afterwards. Then DCM was removed under reduced pressure and the suspension was filtered. The solid was washed with water, methanol, triethylamine and again methanol. The yellow product was then further purified via recrystallization from  $\text{CHCl}_3$ . The product was isolated as yellow solid (27 mg, 35.5  $\mu\text{mol}$ , 79% yield).

$^1\text{H}$  NMR and  $^{13}\text{C}$  NMR could not be measured due to low solubility; FTIR (Neat)  $\nu$  [ $\text{cm}^{-1}$ ]: 2952, 2927, 2862, 1620, 1592, 1548, 1537, 1470, 1435, 1407, 1367, 1320, 1286, 1251, 1231, 1127, 1008, 969, 914, 881, 867, 841, 809, 786, 764, 751, 738, 726, 716, 659, 644, 621; UV/Vis ( $\text{CHCl}_3$ , 0.01 mg/ml, [nm]): 261, 292, 340, 421, 444; HRMS-MALDIposPVP: calc for  $\text{C}_{54}\text{H}_{55}\text{N}_4^+$ : 759.4421, found: 759.4423; mp: >300  $^\circ\text{C}$ .

**Compound 11c**

## SUPPORTING INFORMATION

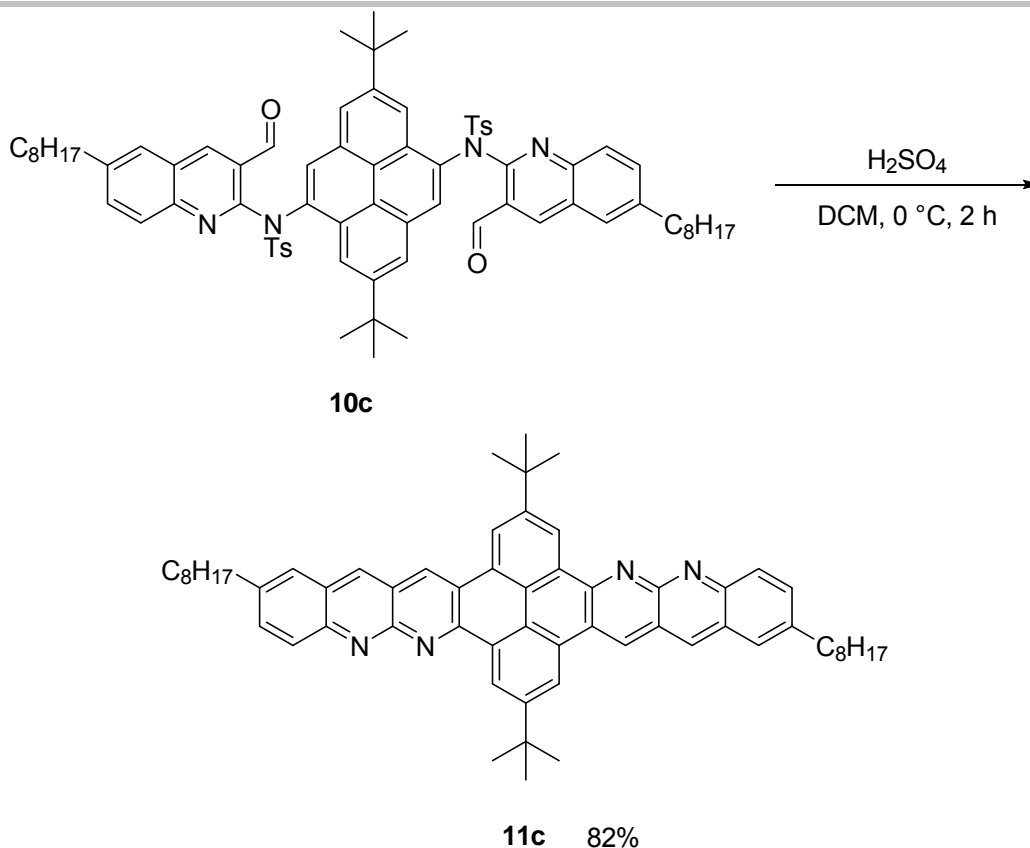

N,N'-(2,7-di-tert-butylpyrene-4,9-diyl)bis(N-(3-formyl-6-octylquinolin-2-yl)-4-methylbenzene-sulfonamide) **10c** (85 mg, 71  $\mu\text{mol}$ , 1.0 eq) was dissolved in 80 ml DCM and the solution was cooled to 0 °C. Then  $\text{H}_2\text{SO}_4$  (0.8 ml, 1 vol% of solvent) was added dropwise and the reaction mixture was stirred at 0 °C for 2 hours. Then 1 ml ethylenediamine was added dropwise to quench the reaction and 20 ml of a diluted  $\text{K}_2\text{CO}_3$  solution was added afterwards. Then DCM was removed under reduced pressure and the suspension was filtered. The solid was washed with water, methanol, triethylamine and again methanol. The yellow product was then further purified via recrystallization from  $\text{CHCl}_3$ . The product was isolated as yellow solid (49 mg, 58  $\mu\text{mol}$ , 82% yield).

$^1\text{H}$  NMR ( $\text{TCE-d}_2$ , 600 MHz, 100 °C),  $\delta$  [ppm] = 0.89 (s, 6H), 1.23-1.51 (m, 22H), 1.78 (s, 20H), 2.85 (t, 4H,  $J = 6.4$  Hz), 7.76 (d, 2H,  $J = 8.3$  Hz), 7.82 (s, 2H), 8.47 (d, 2H,  $J = 7.9$  Hz), 9.05 (s, 2H), 9.09 (s, 2H), 9.56 (s, 2H), 9.99 (s, 2H);  $^{13}\text{C}$  NMR could not be measured due to low solubility; FTIR (Neat)  $\nu$  [ $\text{cm}^{-1}$ ]: 2953, 2926, 2850, 1635, 1613, 1591, 1548, 1537, 1494, 1459, 1436, 1406, 1365, 1340, 1322, 1288, 1255, 1233, 1203, 1170, 1133, 1001, 917, 882, 870, 854, 826, 802, 788, 766, 752, 726, 644, 623; UV/Vis ( $\text{CHCl}_3$ , 0.0022 mg/ml, [nm]): 262, 290, 297, 329, 343, 395, 421, 445; HRMS-MALDIposCsl: calc for  $\text{C}_{60}\text{H}_{67}\text{N}_4^+$ : 843.5360, found: 843.5365; mp: >300 °C.

**Compound 11d**

## SUPPORTING INFORMATION

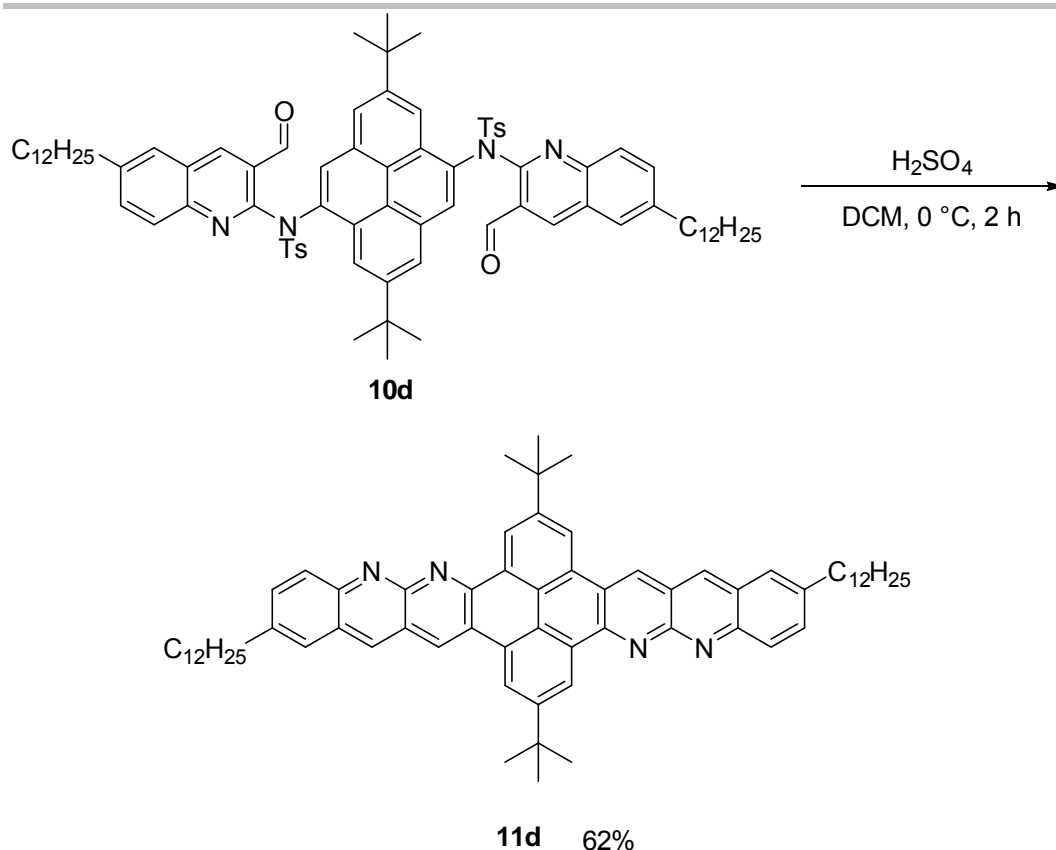

N,N'-(2,7-di-tert-butylpyrene-4,9-diyl)bis(N-(6-dodecyl-3-formylquinolin-2-yl)-4-methylbenzenesulfonamide) **10d** (57 mg, 44  $\mu\text{mol}$ , 1.0 eq) was dissolved in 55 ml DCM and the solution was cooled to 0  $^\circ\text{C}$ . Then  $\text{H}_2\text{SO}_4$  (0.55 ml, 1 vol% of solvent) was added dropwise and the reaction mixture was stirred at 0  $^\circ\text{C}$  for 2 hours. Then 1 ml ethylenediamine was added dropwise to quench the reaction and 20 ml of a diluted  $\text{K}_2\text{CO}_3$  solution was added afterwards. Then DCM was removed under reduced pressure and the suspension was filtered. The solid was washed with water, methanol, triethylamine and again methanol. The yellow product was then further purified via recrystallization from  $\text{CHCl}_3$ /hexane. The product was isolated as yellow solid (26 mg, 27  $\mu\text{mol}$ , 62% yield).

$^1\text{H}$  NMR (TCE- $d^2$ , 600 MHz, 100  $^\circ\text{C}$ ),  $\delta$  [ppm] = 0.86 (s, 6H), 1.23-1.32 (m, 28H), 1.35-1.47 (m, 8H), 1.74-1.83 (m, 22H), 2.86 (s, 4H), 7.76 (d, 2H,  $J = 8.4$  Hz), 7.82 (s, 2H), 8.38 (s, 2H), 9.05 (s, 2H), 9.57 (s, 2H), 9.98 (s, 2H);  $^{13}\text{C}$  NMR could not be measured due to low solubility; FTIR (Neat)  $\nu$  [ $\text{cm}^{-1}$ ]: 2953, 2921, 2851, 1637, 1614, 1592, 1536, 1492, 1466, 1436, 1405, 1367, 1286, 1254, 1235, 1129, 1001, 914, 875, 817, 801, 787, 766, 751, 724, 643, 622; HRMS-MALDIposCSi: calc for  $\text{C}_{68}\text{H}_{84}\text{N}_4^{2+}$ : 956.6685, found: 956.6685; mp: >300  $^\circ\text{C}$ .

## 2. X-ray crystal structure and –packing of 5c

## SUPPORTING INFORMATION

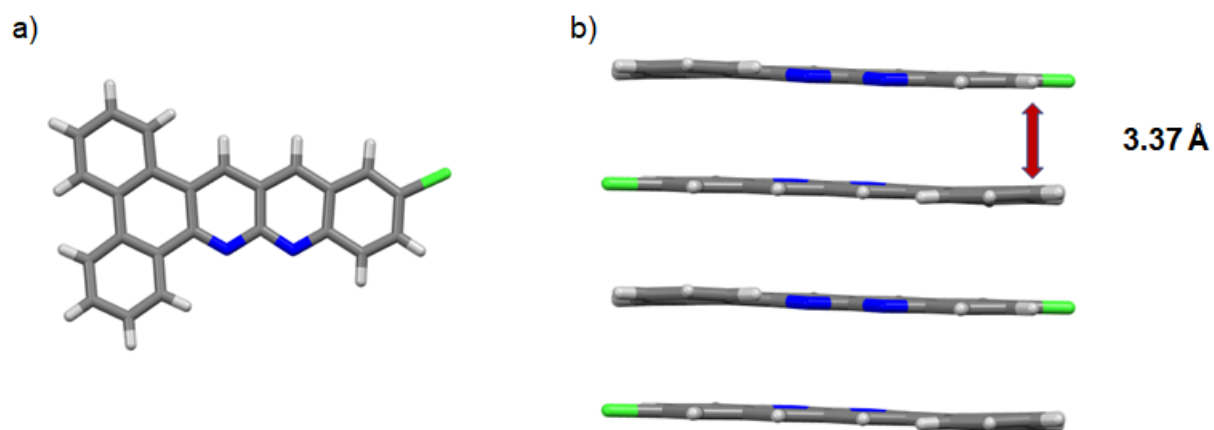

**Figure S1:** Solid-state structure and packing of 5c

### 3. Cyclovoltammetry (CV) data of 5a-h

## SUPPORTING INFORMATION

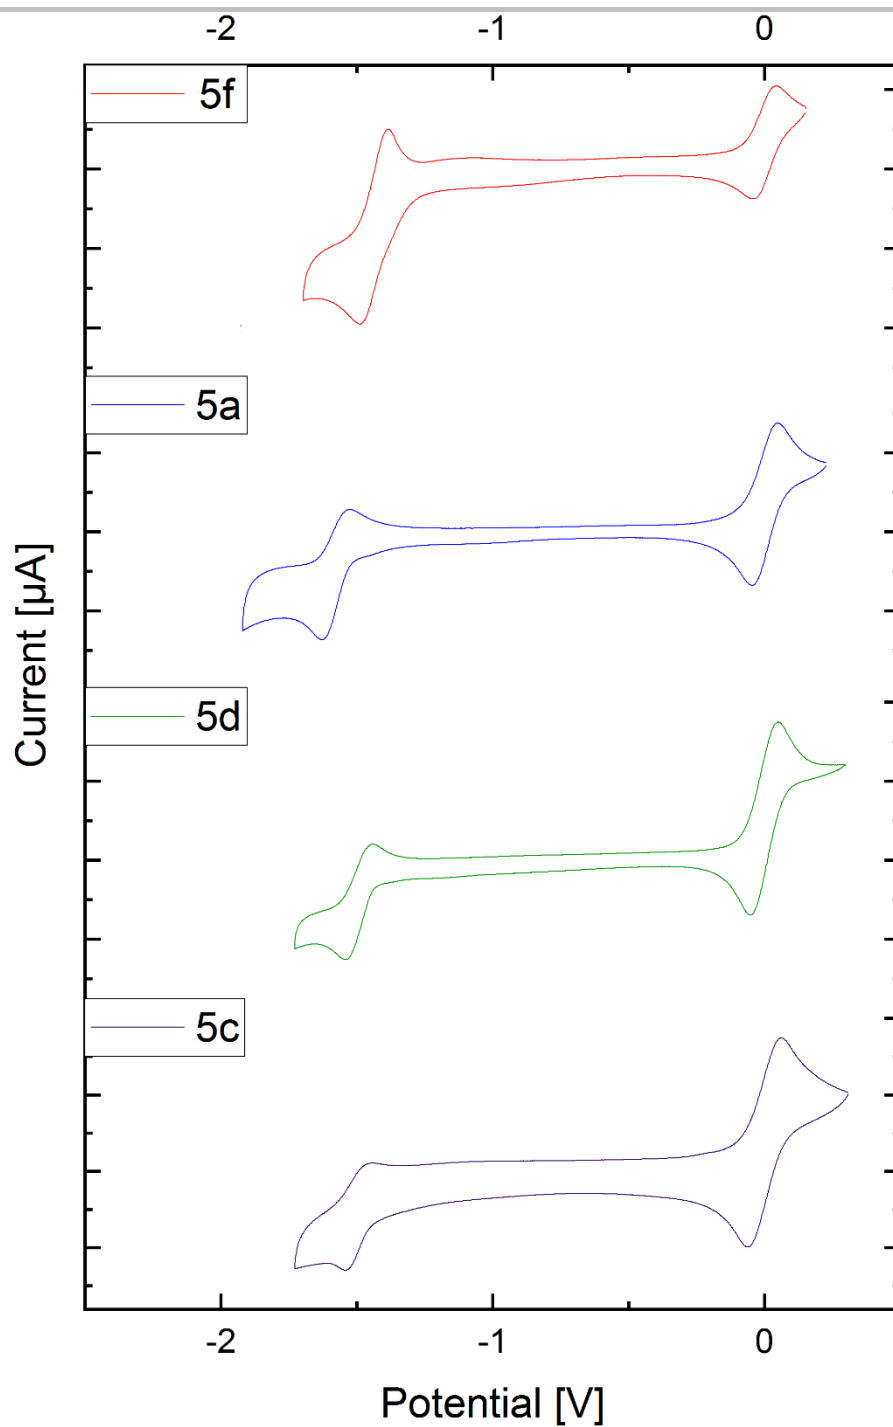

**Figure S2:** CV spectra of **5a**, **5c**, **5d**, and **5f** in DCM with ferrocene (Fc) as internal standard, scan rate: 0.1 V/s, 0.1 M solution of tetrabutylammonium hexafluorophosphate ( $\text{Bu}_4\text{NPF}_6$ ), RE: Ag, WE: Pt, CE: Pt/Ti at room temperature.

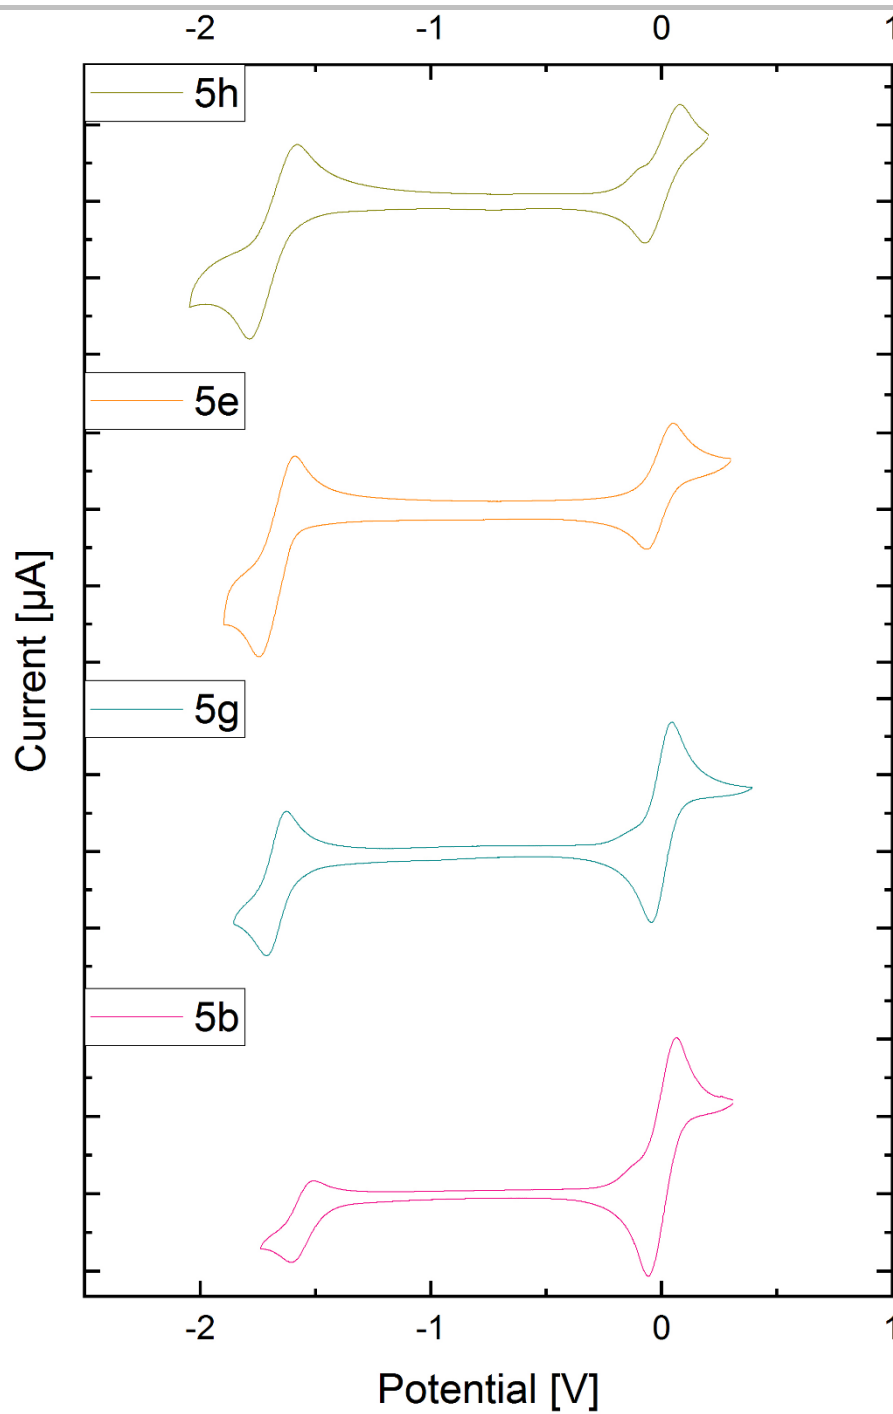

**Figure S3:** CV spectra of **5b**, **5e**, **5g**, and **5h** in DCM with ferrocene (Fc) as internal standard, scan rate: 0.1 V/s, 0.1 M solution of tetrabutylammonium hexafluorophosphate ( $\text{Bu}_4\text{NPF}_6$ ), RE: Ag, WE: Pt, CE: Pt/Ti at room temperature.

#### 4. UV-Vis- and fluorescence spectra of 5a-h and 11a-d



## SUPPORTING INFORMATION

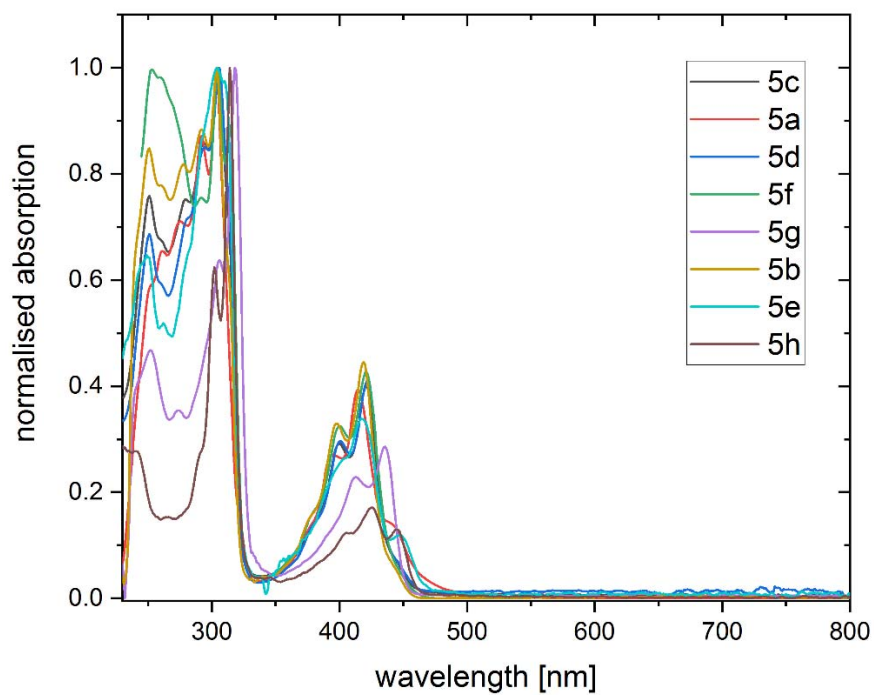

Figure S4: Normalized UV-Vis spectra of 5a-h.

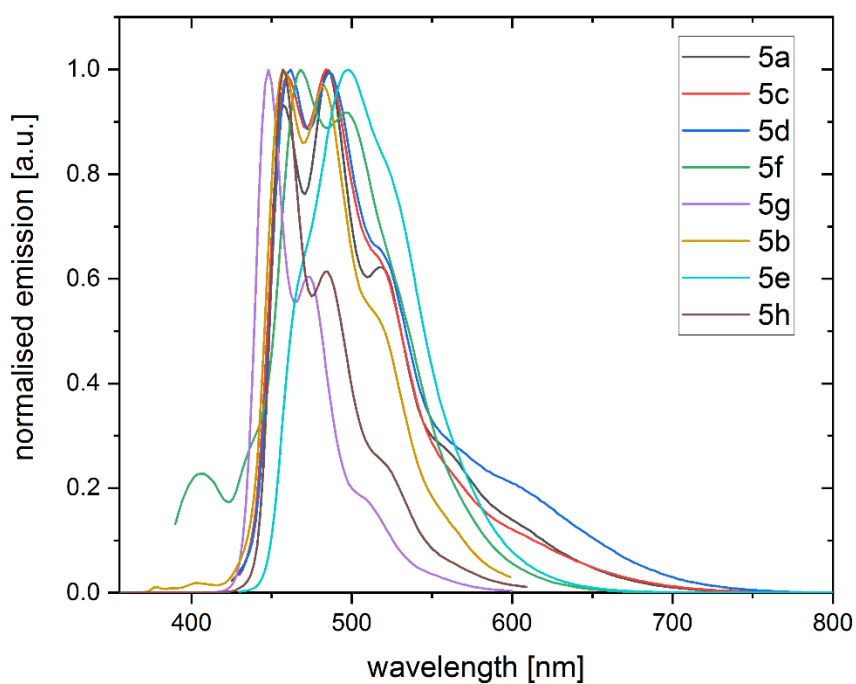

Figure S5: Normalized fluorescence spectra of 5a-h.

## SUPPORTING INFORMATION

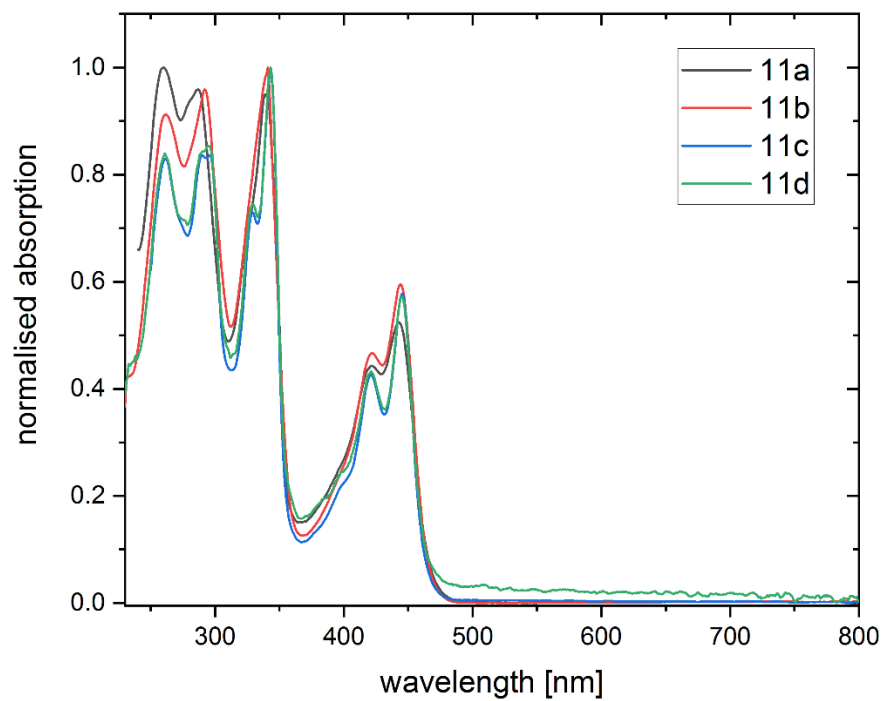

Figure S6: Normalized UV-Vis spectra of 11a-d.

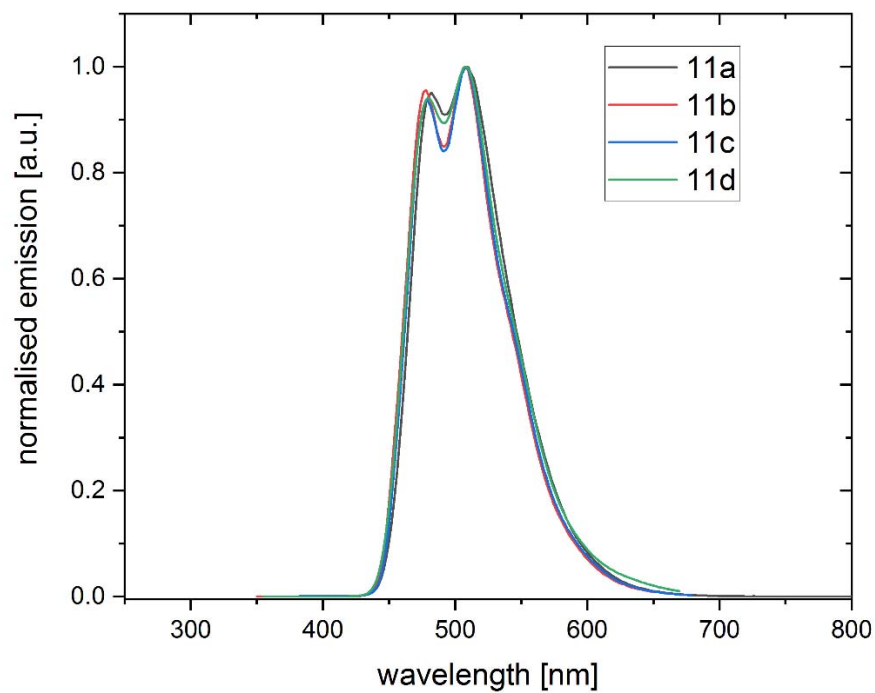

Figure S7: Normalized fluorescence spectra of 11a-d.

## SUPPORTING INFORMATION

**Table S1.** Photoluminescence quantum yields (PLQY) of compound **5a-h** and **11a-d**.

| compound   | Photoluminescence quantum yield (PLQY) |
|------------|----------------------------------------|
| <b>5a</b>  | 9 %                                    |
| <b>5b</b>  | 8 %                                    |
| <b>5c</b>  | 6 %                                    |
| <b>5d</b>  | 3 %                                    |
| <b>5e</b>  | 23 %                                   |
| <b>5f</b>  | 6 %                                    |
| <b>5g</b>  | 39 %                                   |
| <b>5h</b>  | 30 %                                   |
| <b>11a</b> | 13 %                                   |
| <b>11b</b> | 13 %                                   |
| <b>11c</b> | 13 %                                   |
| <b>11d</b> | 19 %                                   |

## 5. NMR spectra

### 5.1. NMR of ynamides and starting materials

#### 4-methyl-N-(phenanthren-9-yl)benzenesulfonamide **12**

<sup>1</sup>H NMR

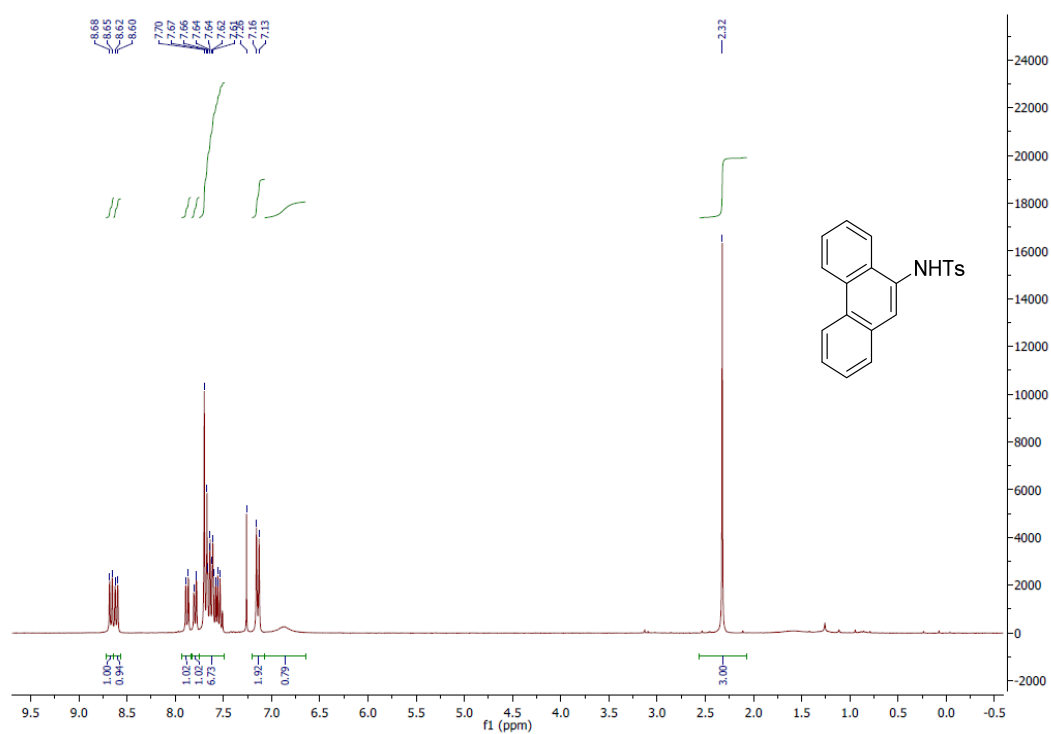

## SUPPORTING INFORMATION

<sup>13</sup>C NMR: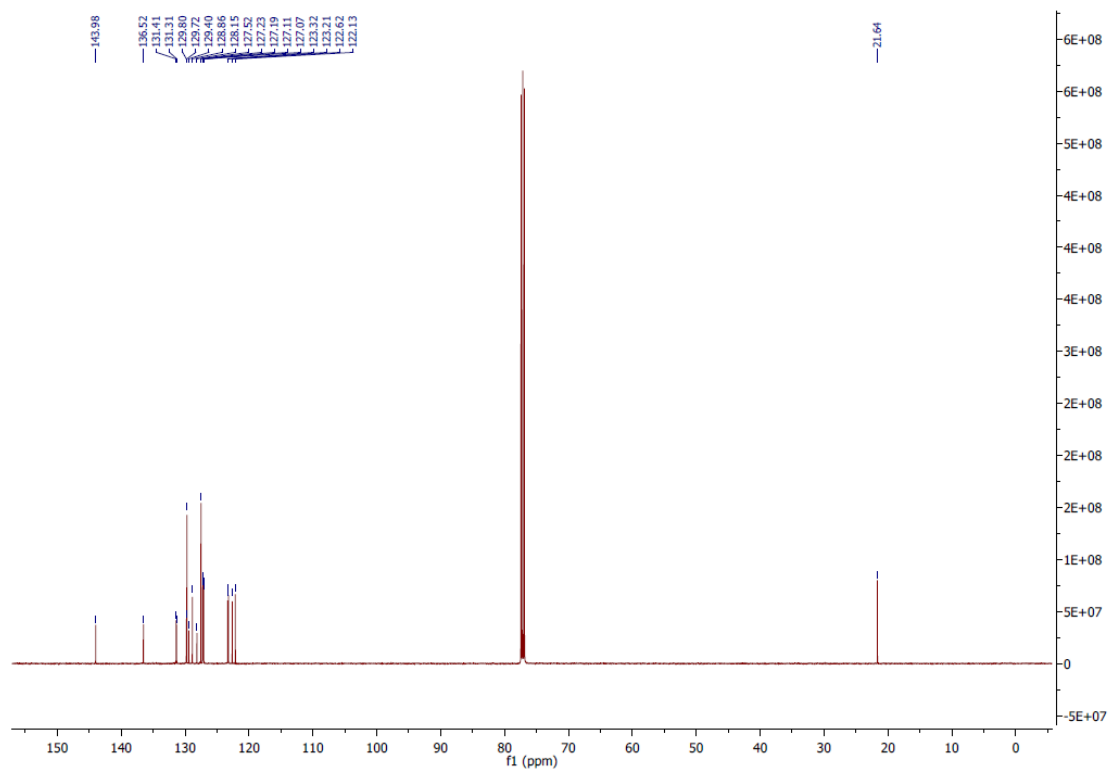**N-ethynyl-4-methyl-N-(phenanthren-9-yl)benzenesulfonamide 14**<sup>1</sup>H NMR: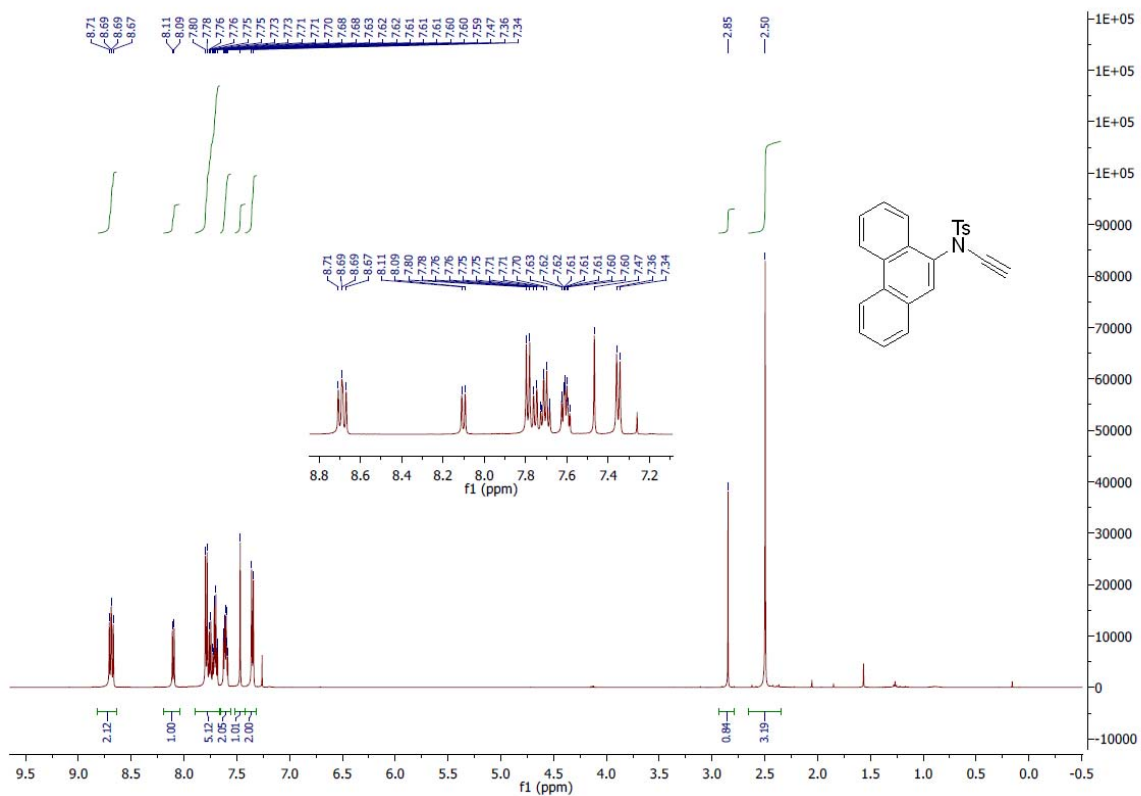<sup>13</sup>C NMR:

## SUPPORTING INFORMATION

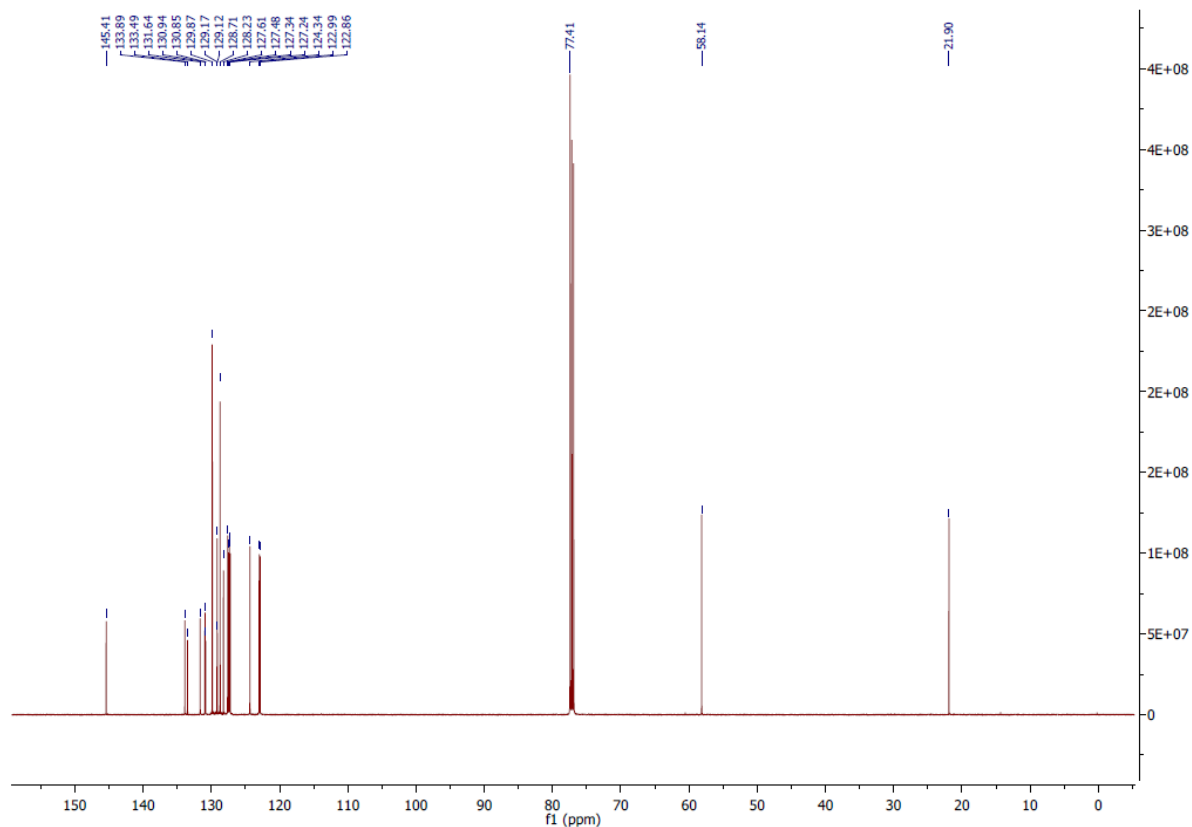**N-(3-hydroxyprop-1-yn-1-yl)-4-methyl-N-(phenanthren-9-yl)benzenesulfonamide 15**<sup>1</sup>H NMR: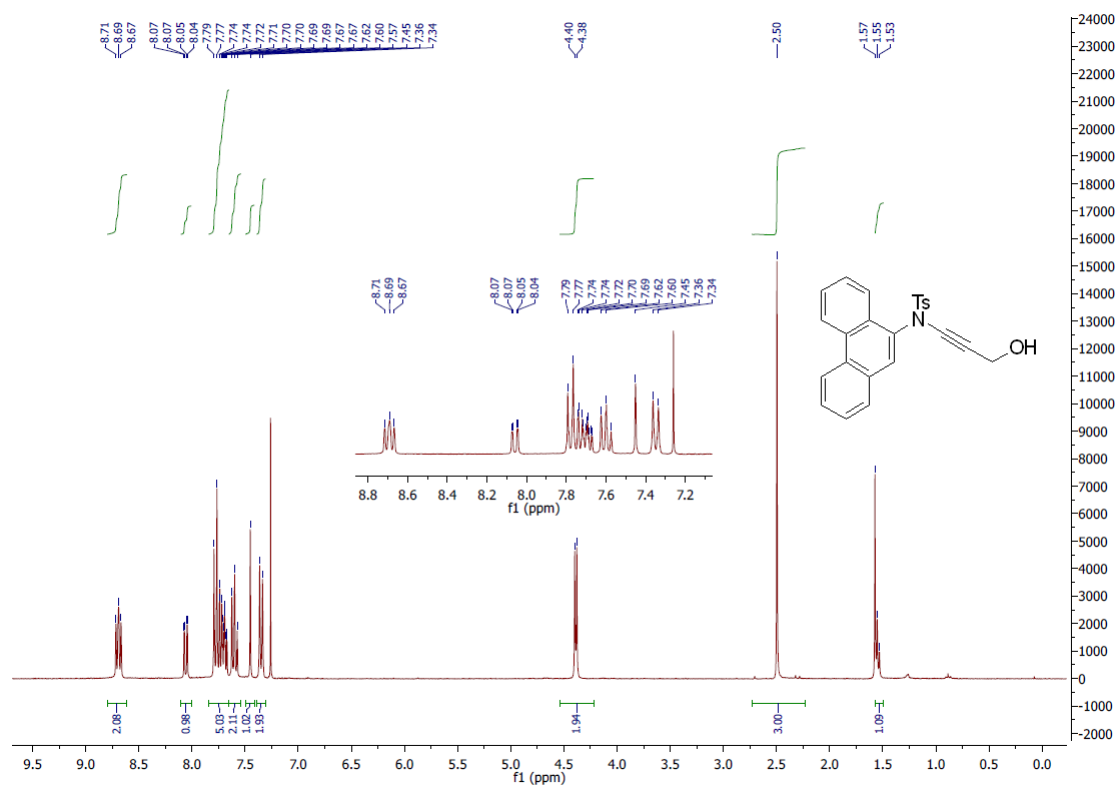<sup>13</sup>C NMR:



## SUPPORTING INFORMATION

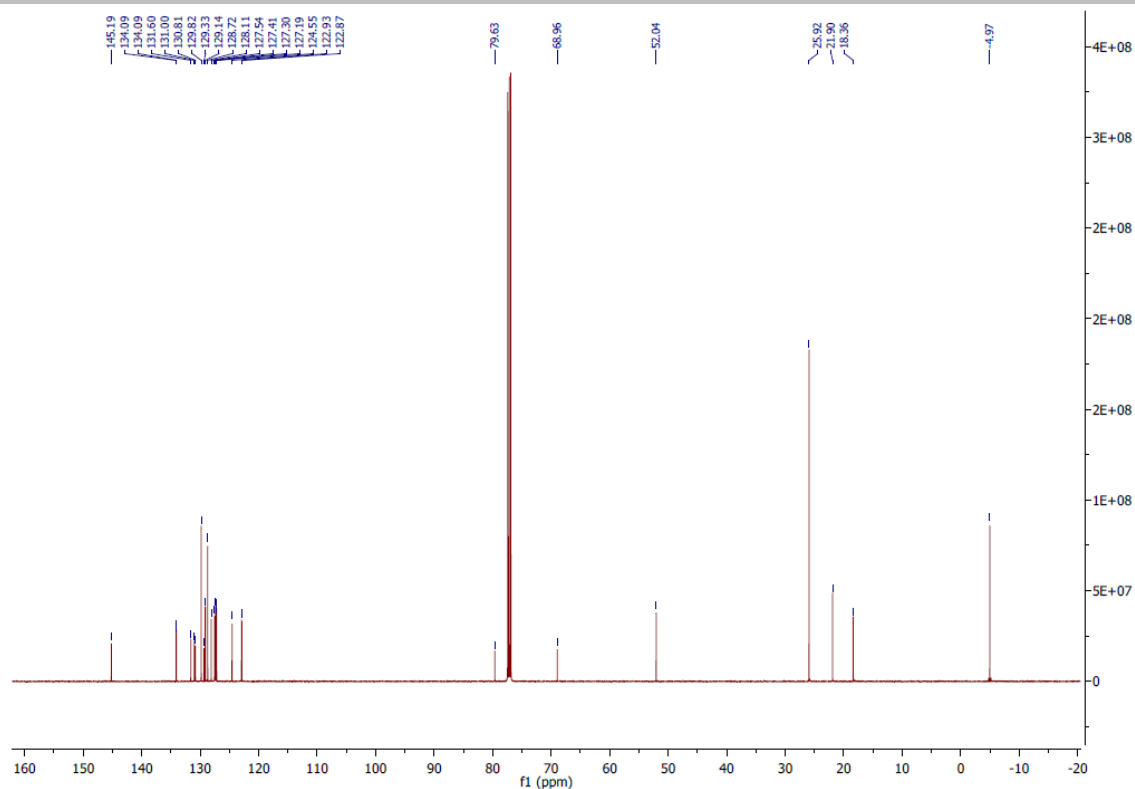

## N-(3-((tert-butyldimethylsilyloxy)prop-1-yn-1-yl)-4-methyl-N-(naphthalen-2-yl)benzenesulfonamide 1b

<sup>1</sup>H NMR: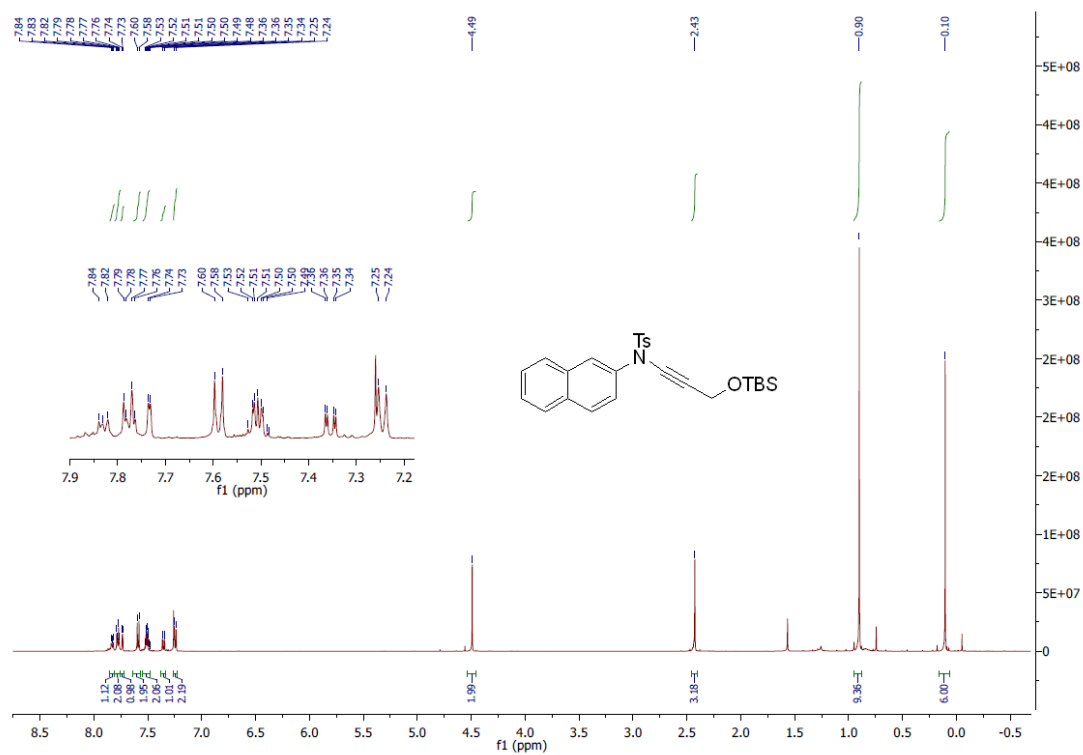<sup>13</sup>C NMR:

## SUPPORTING INFORMATION

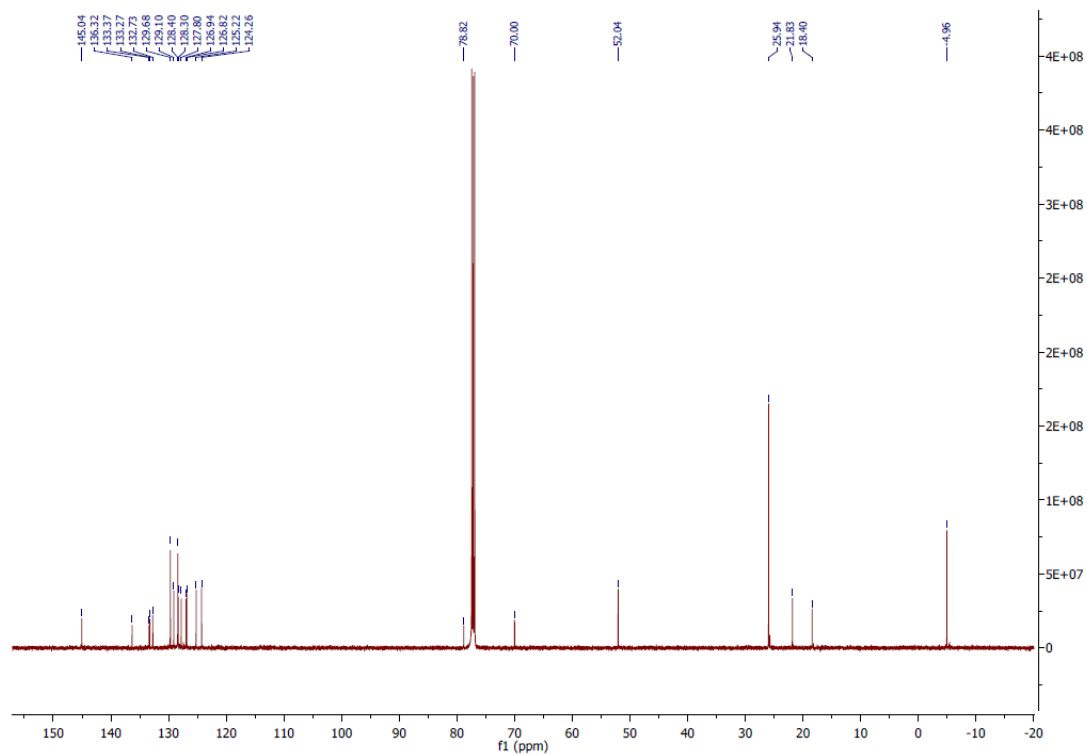**1,1'-(2,7-di-tert-butylpyrene-4,9-diyl)bis(ethan-1-one) 17**<sup>1</sup>H NMR: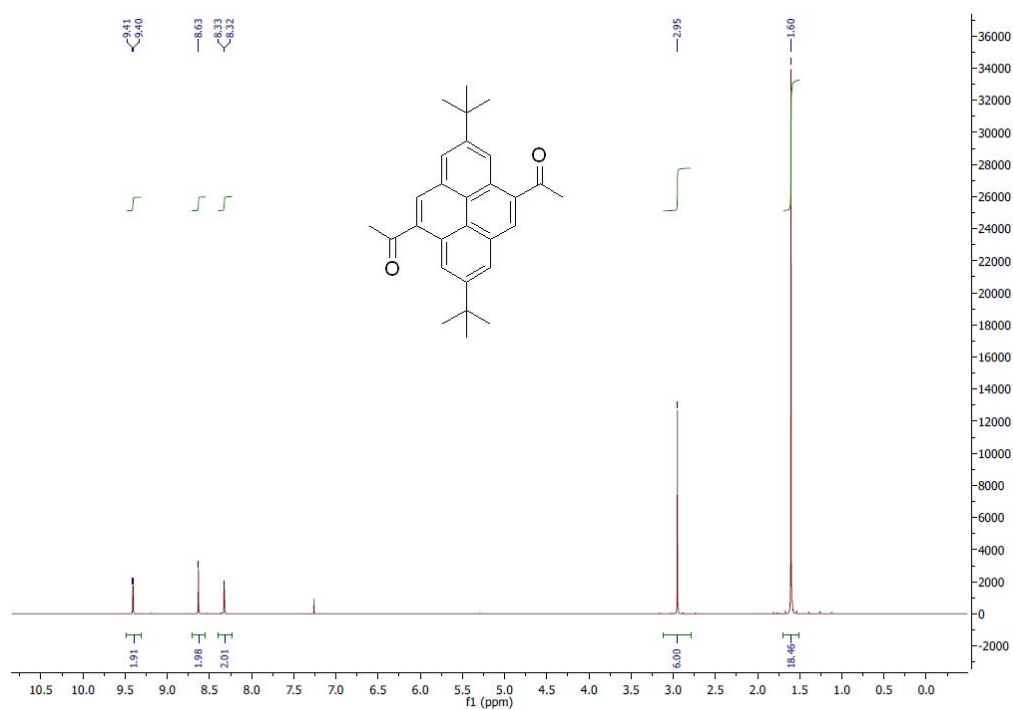<sup>13</sup>C NMR:



## SUPPORTING INFORMATION

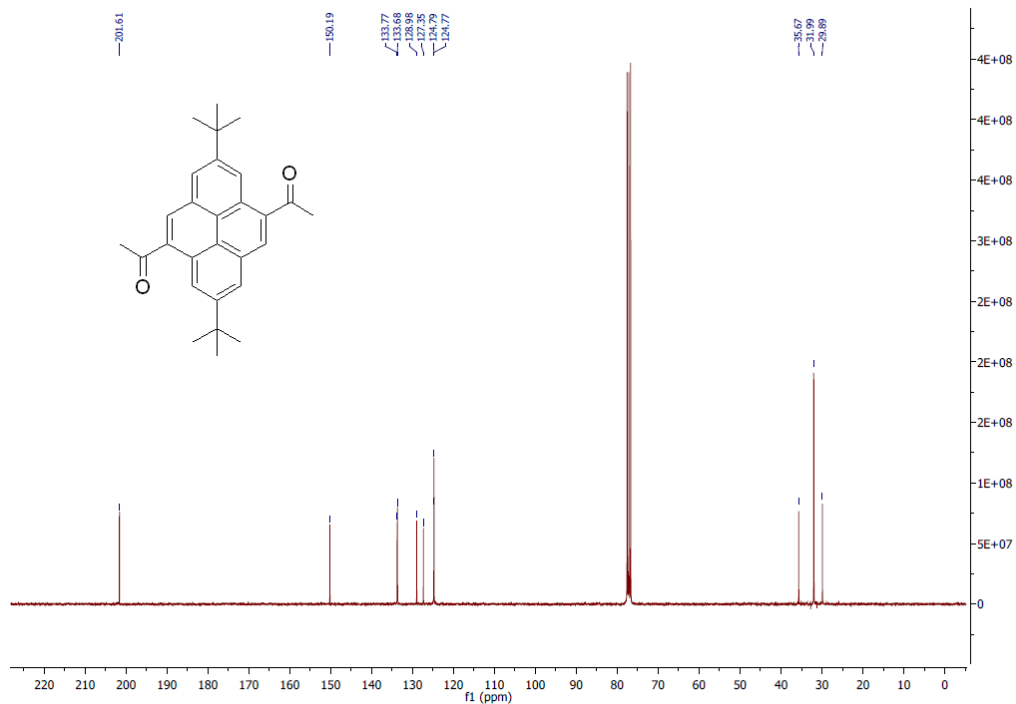**1,1'-(2,7-di-tert-butylpyrene-4,9-diyl)bis(ethan-1-ol) 7** $^1\text{H}$  NMR: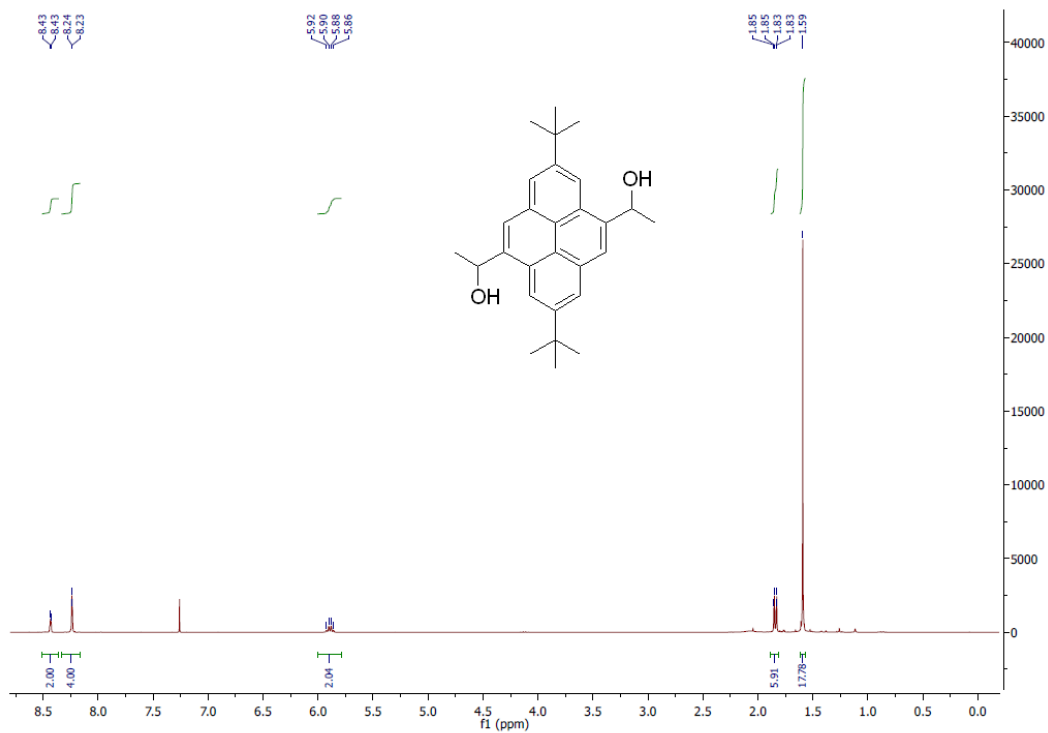 $^{13}\text{C}$  NMR:

## SUPPORTING INFORMATION

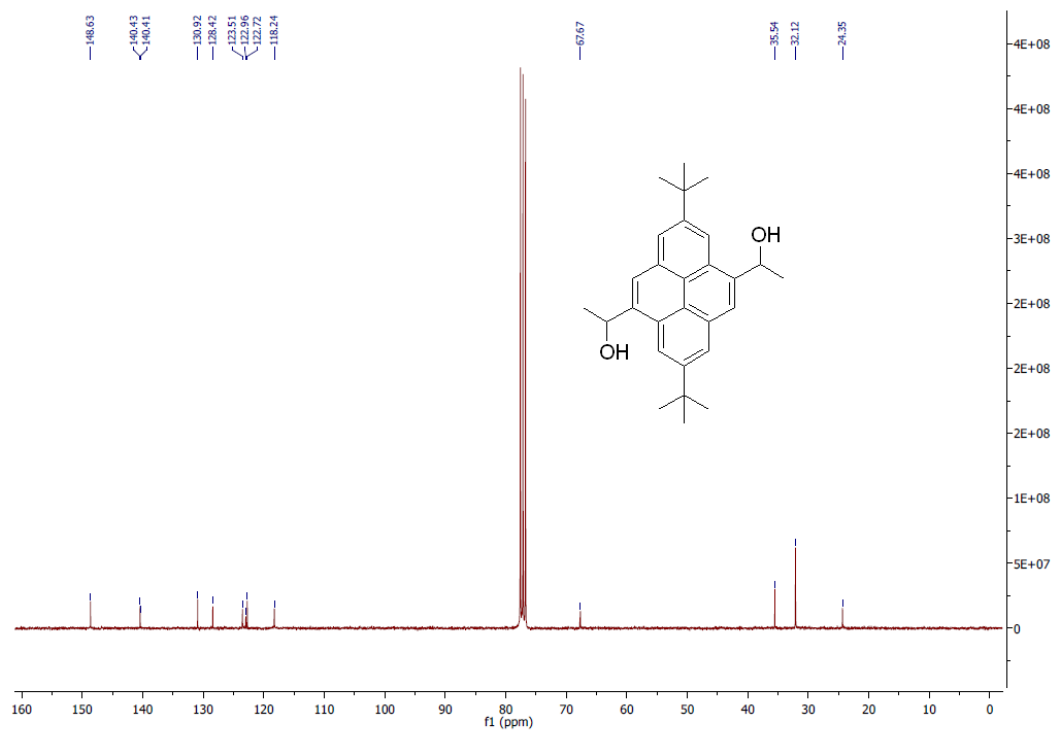**2,7-di-tert-butylpyrene-4,9-diamine 8**<sup>1</sup>H NMR: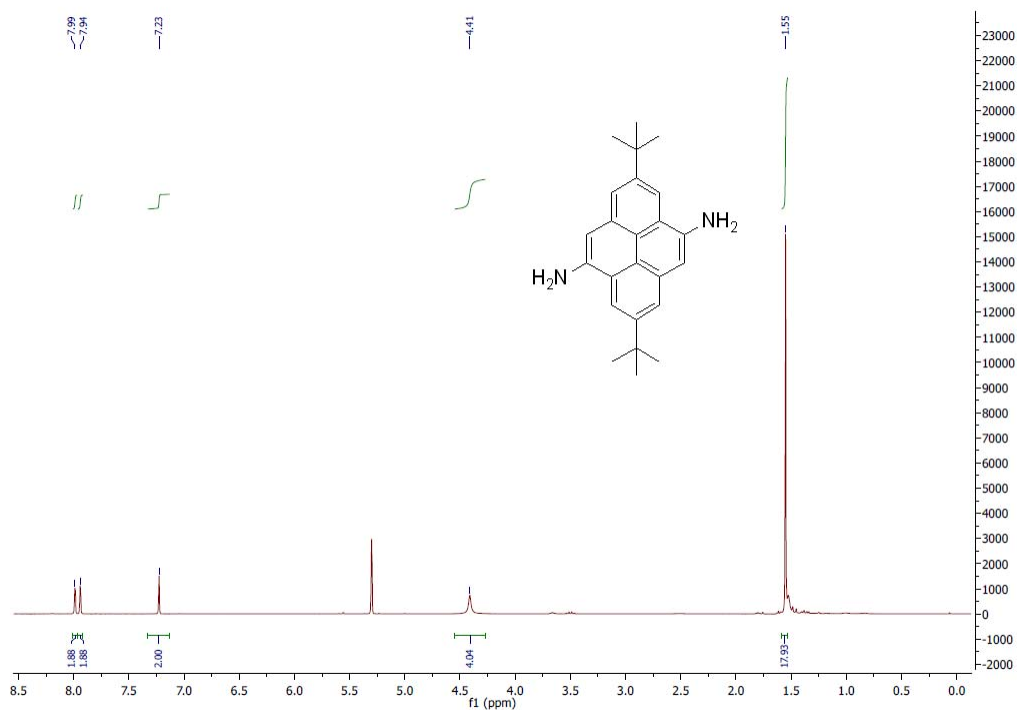<sup>13</sup>C NMR:

## SUPPORTING INFORMATION

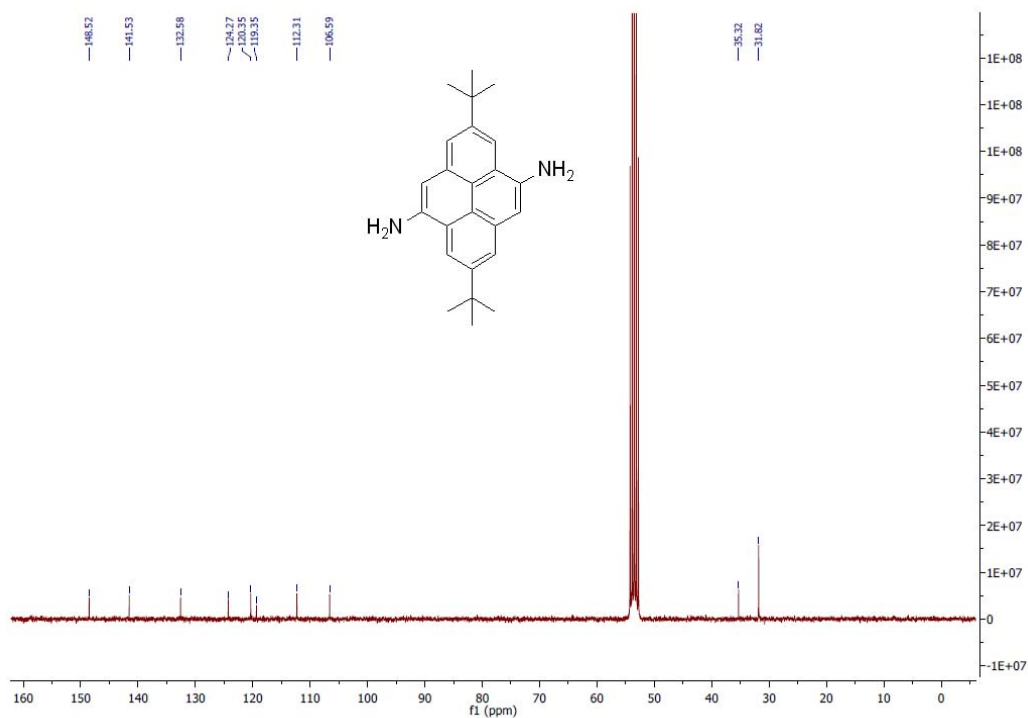**N,N'**-(2,7-di-tert-butylpyrene-4,9-diyl)bis(4-methylbenzenesulfonamide) 18 $^1\text{H}$  NMR: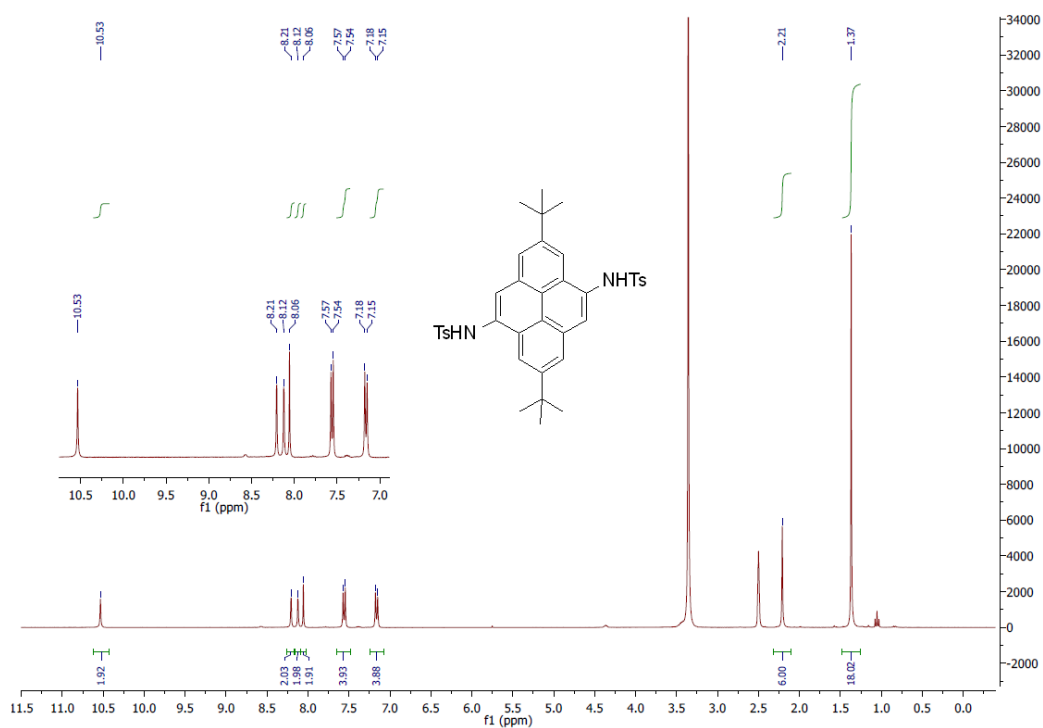 $^{13}\text{C}$  NMR:

## SUPPORTING INFORMATION

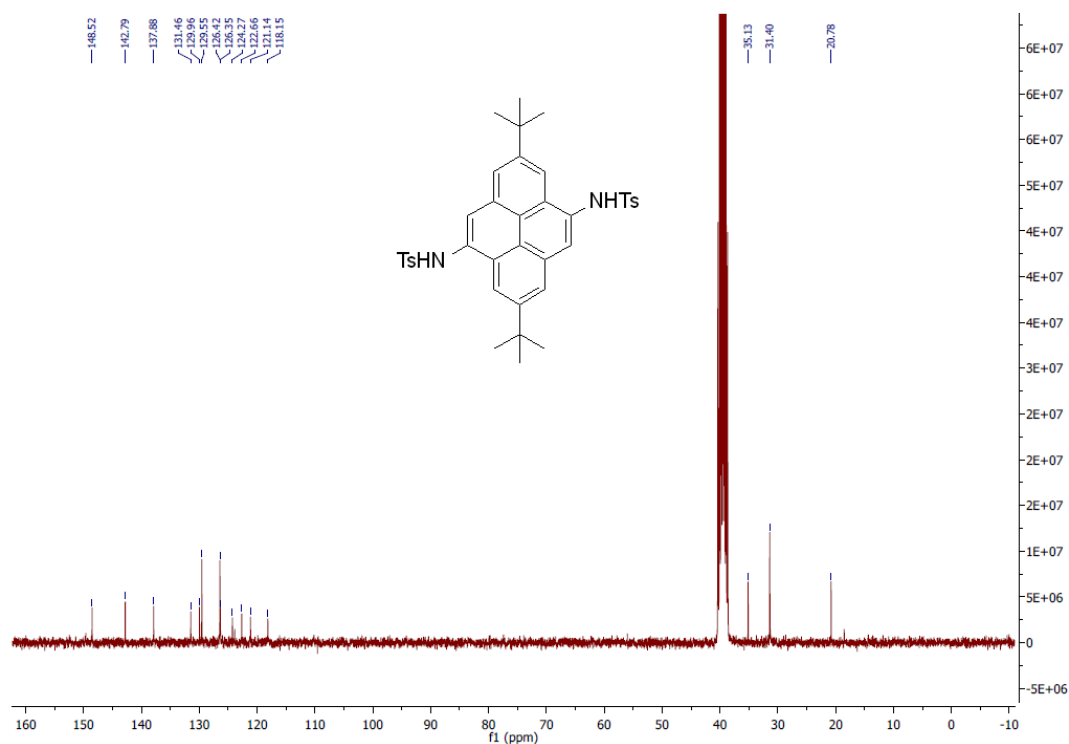**N,N'-(2,7-di-tert-butylpyrene-4,9-diyl)bis(N-ethynyl-4-methylbenzenesulfonamide) 19****<sup>1</sup>H NMR:**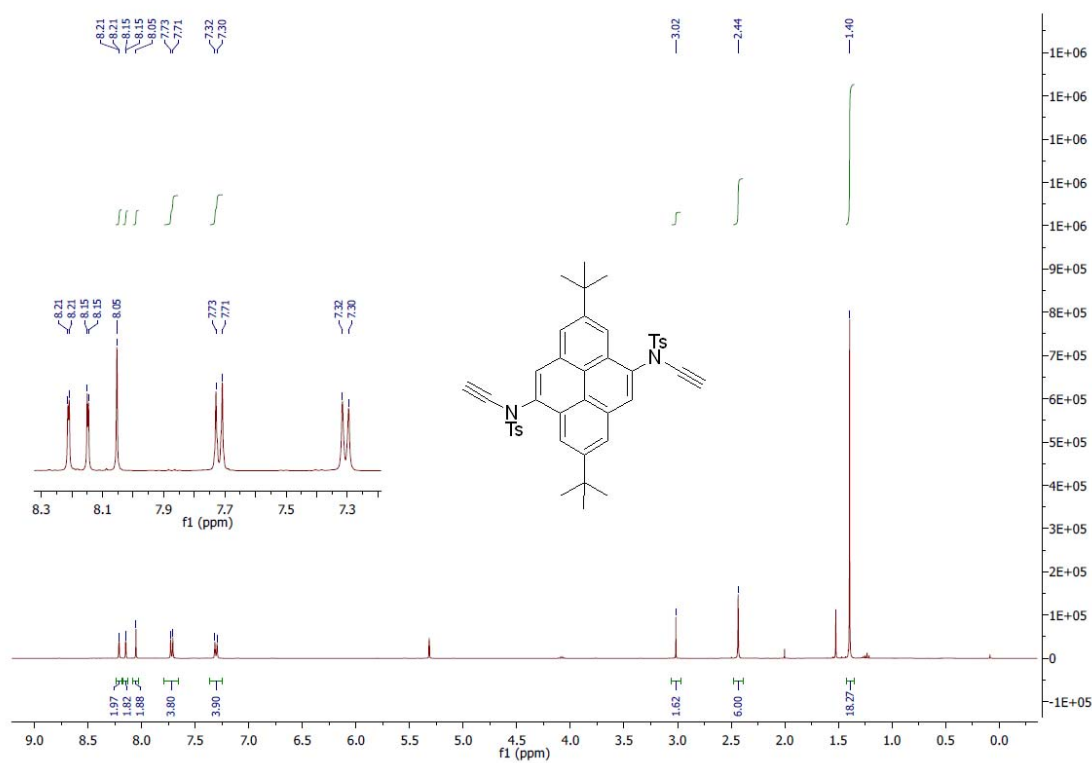**<sup>13</sup>C NMR:**

## SUPPORTING INFORMATION

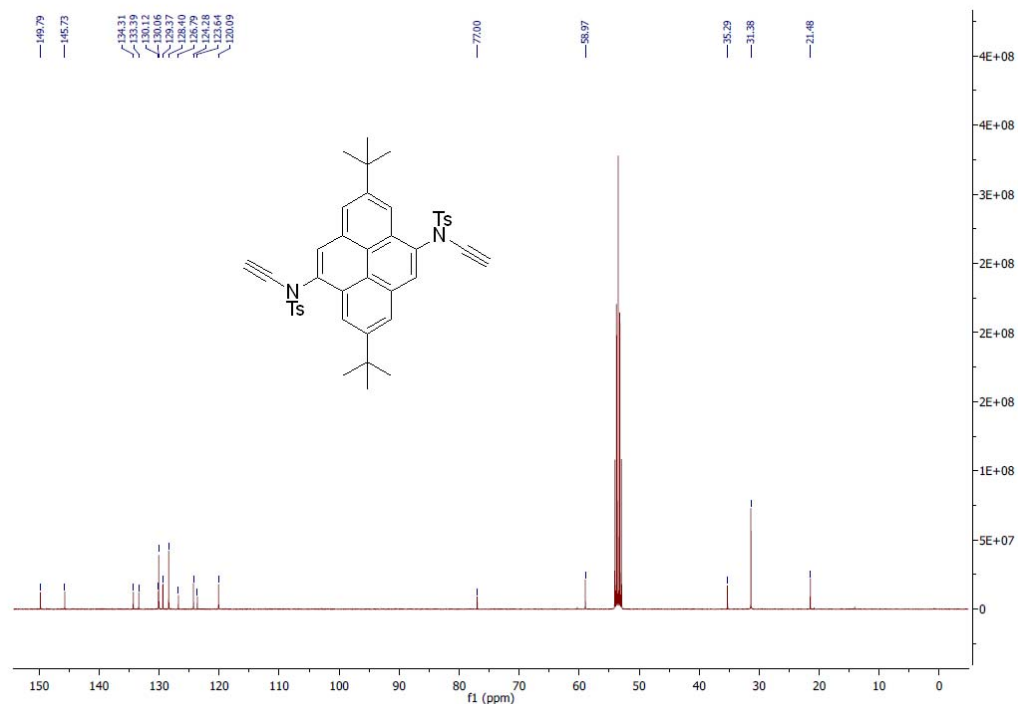**N,N'-(2,7-di-tert-butylpyrene-4,9-diyl)bis(N-(3-hydroxyprop-1-yn-1-yl)-4-methylbenzenesulfonamide) 20**<sup>1</sup>H NMR: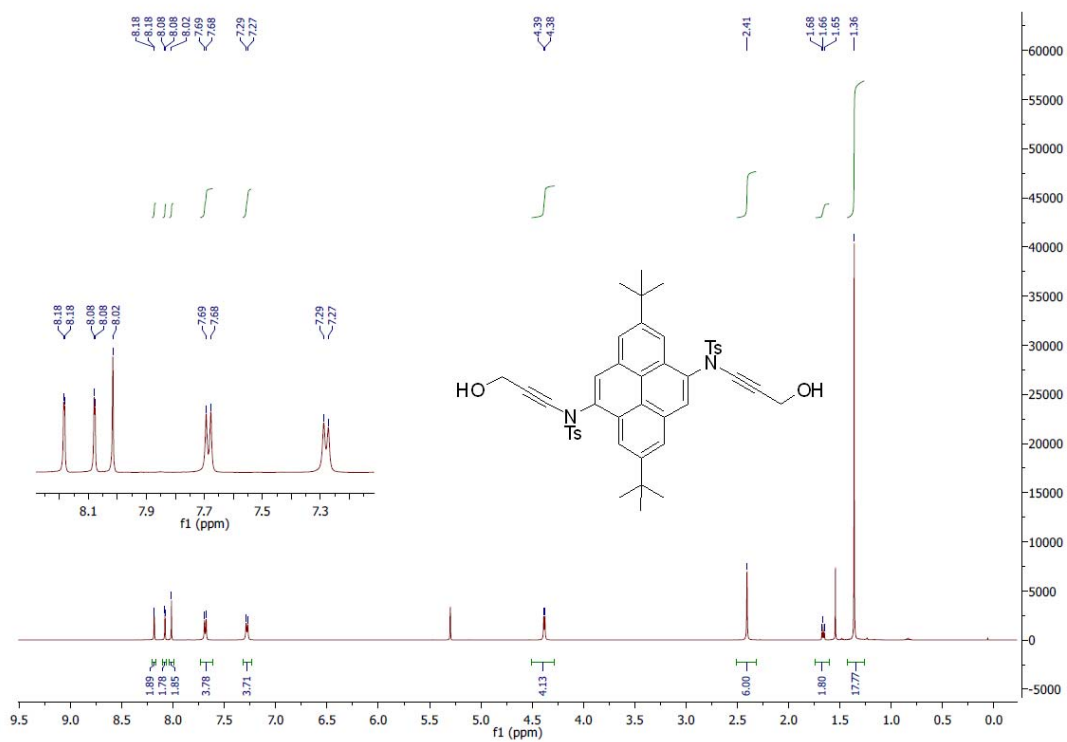<sup>13</sup>C NMR:

## SUPPORTING INFORMATION

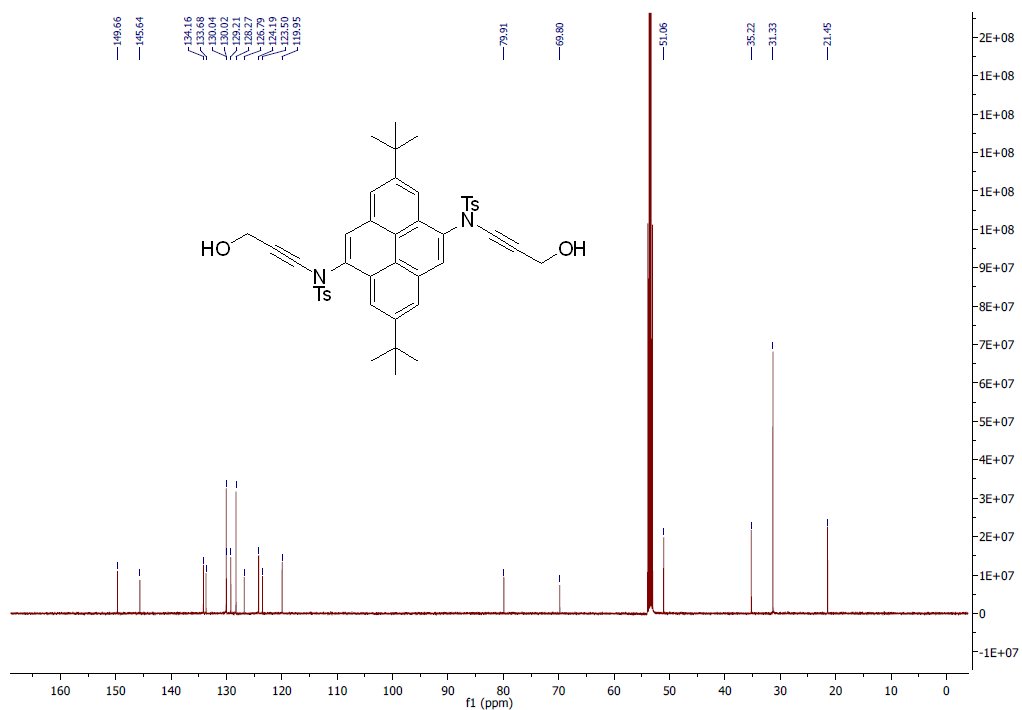

**N,N'-(2,7-di-tert-butylpyrene-4,9-diyl)bis(N-(3-((tert-butyl)dimethylsilyloxy)prop-1-yn-1-yl)-4-methylbenzenesulfonamide) 9**

**<sup>1</sup>H NMR:**

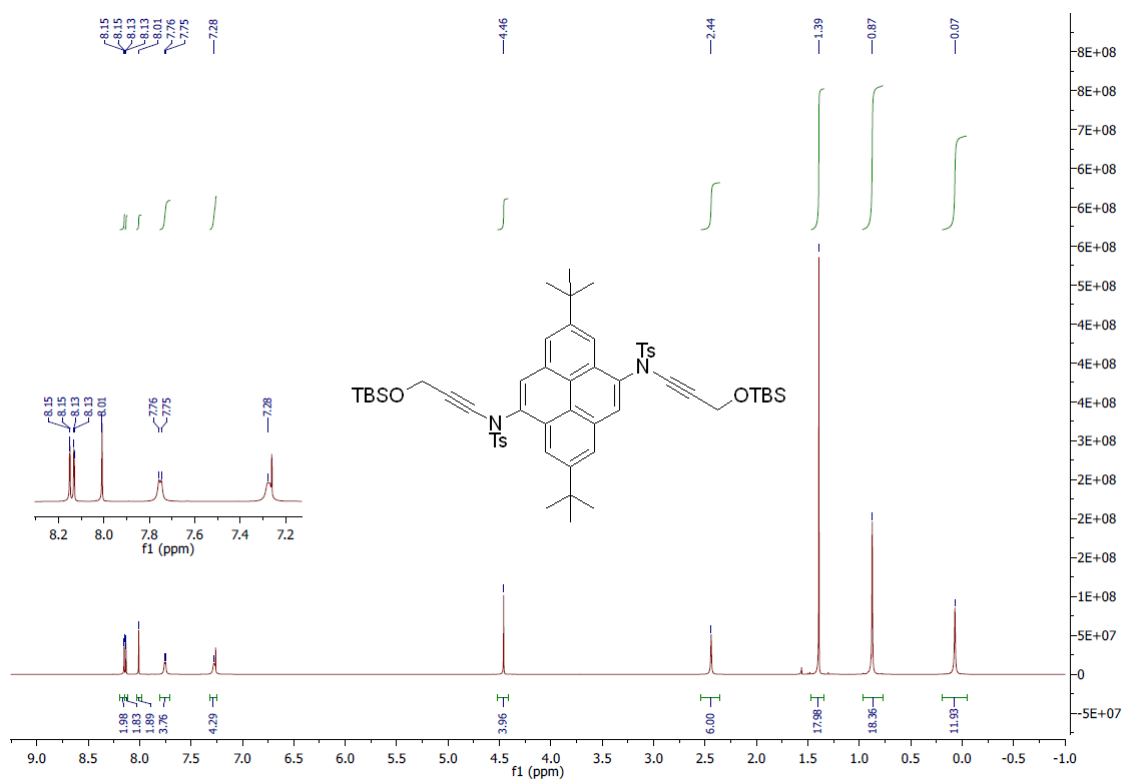

**<sup>13</sup>C NMR:**

## SUPPORTING INFORMATION

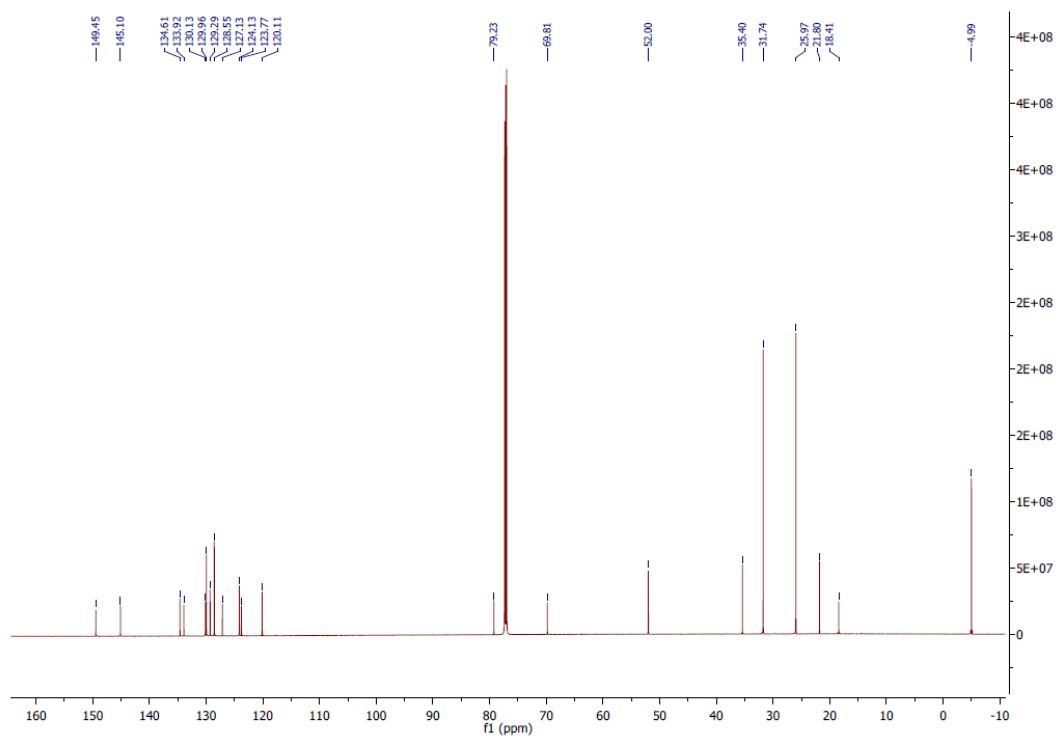

## 5.2. NMR of Quinolines 4a-h and 10a-d

## N-(3-formylquinolin-2-yl)-4-methyl-N-(phenanthren-9-yl)benzenesulfonamide 4a

<sup>1</sup>H NMR: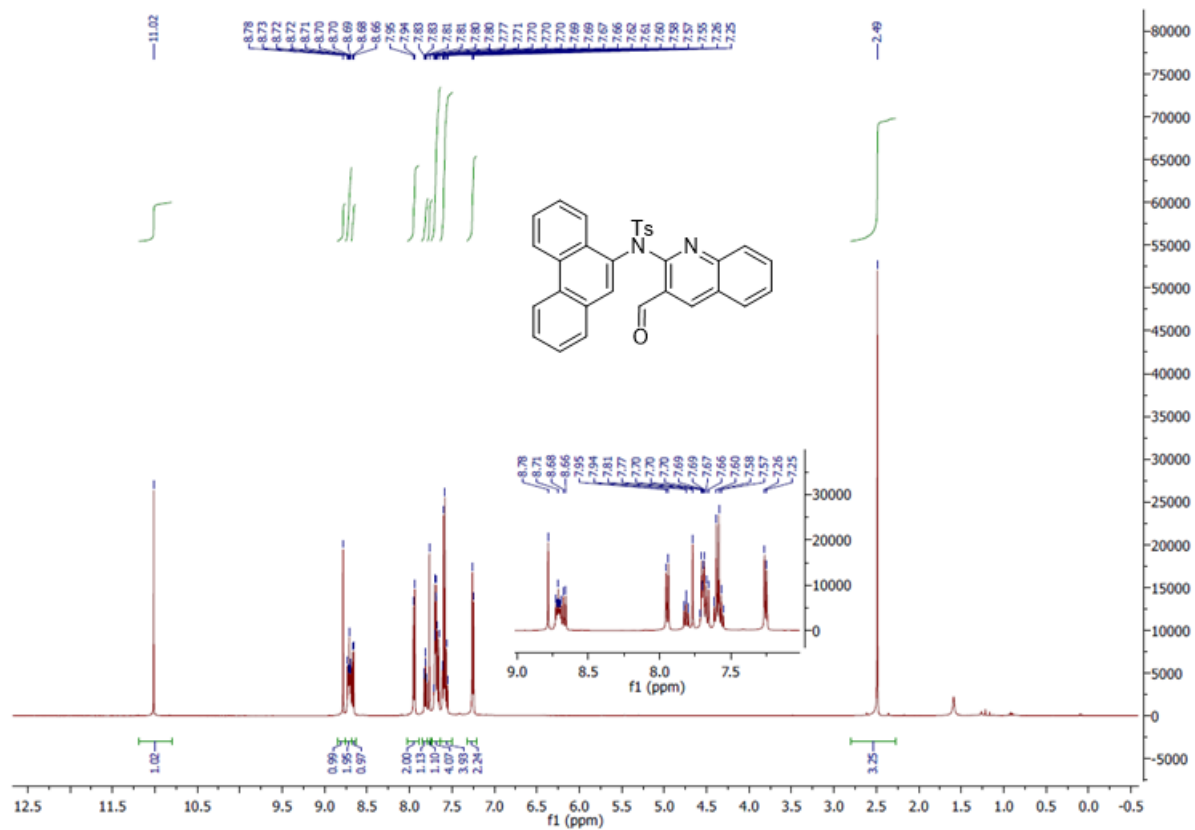<sup>13</sup>C NMR:

## SUPPORTING INFORMATION

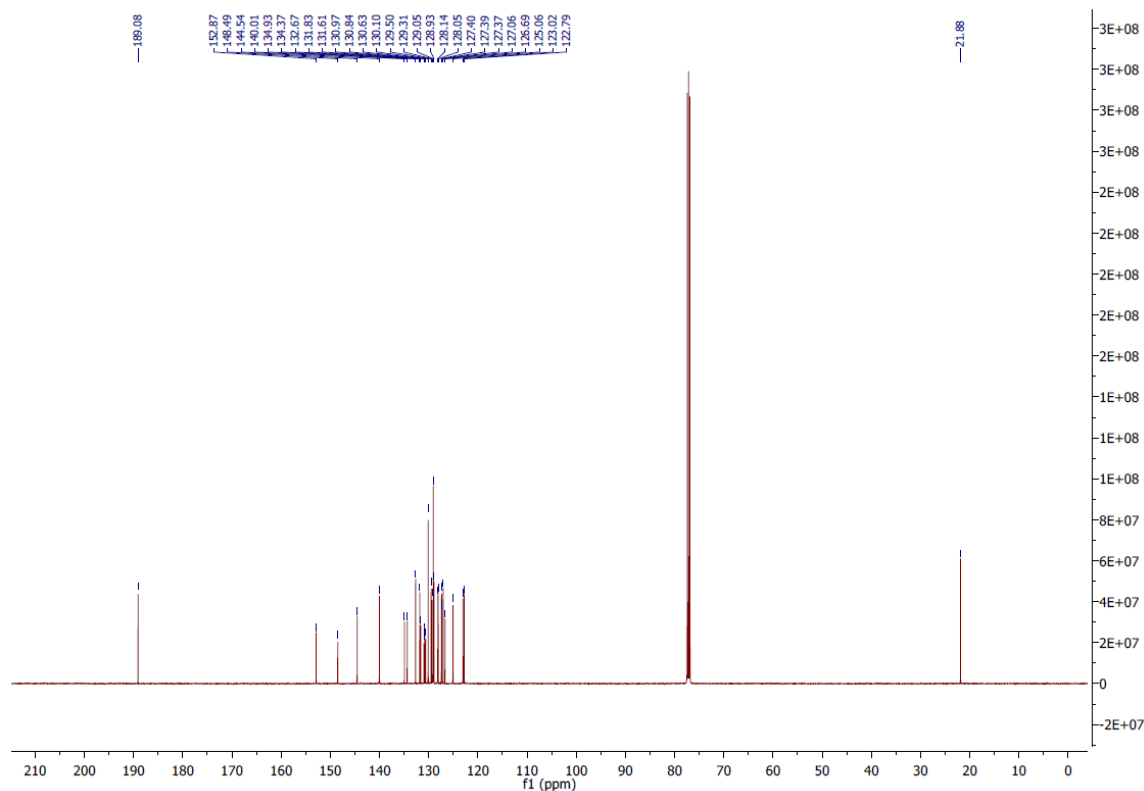**N-(6-fluoro-3-formylquinolin-2-yl)-4-methyl-N-(phenanthren-9-yl)benzenesulfonamide 4b**<sup>1</sup>H NMR: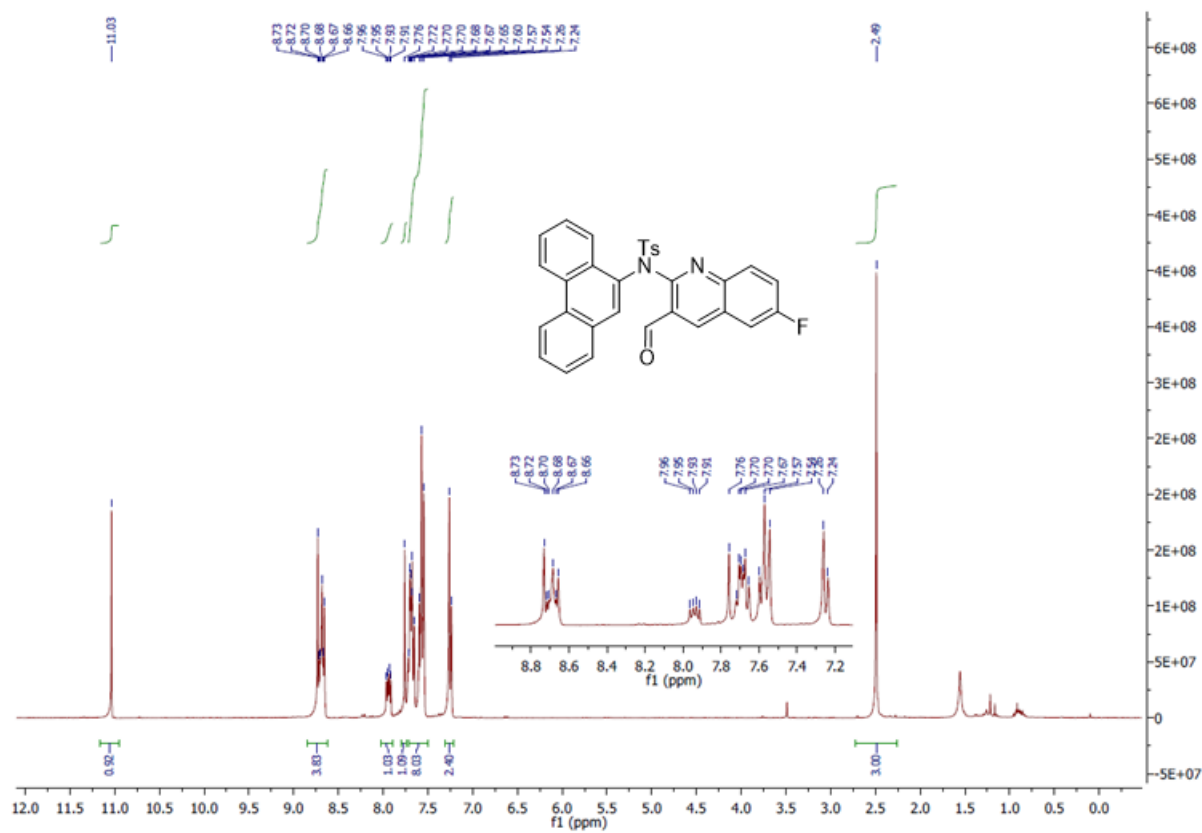<sup>13</sup>C NMR:



## SUPPORTING INFORMATION

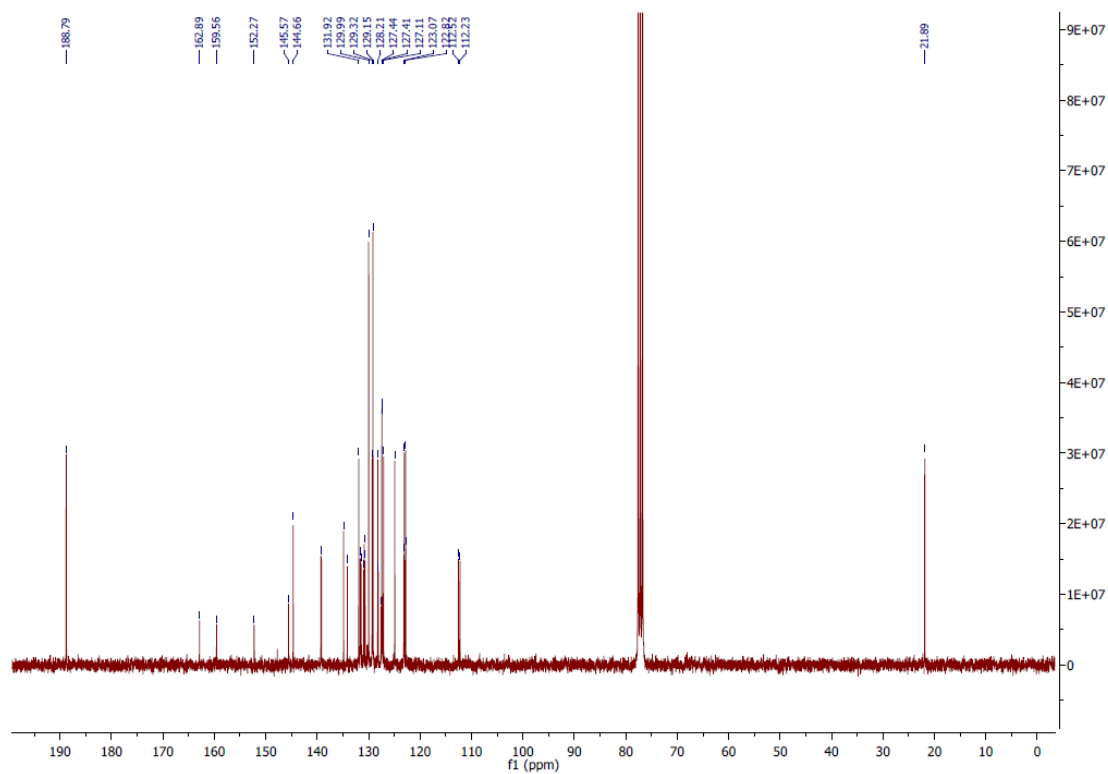<sup>19</sup>F NMR: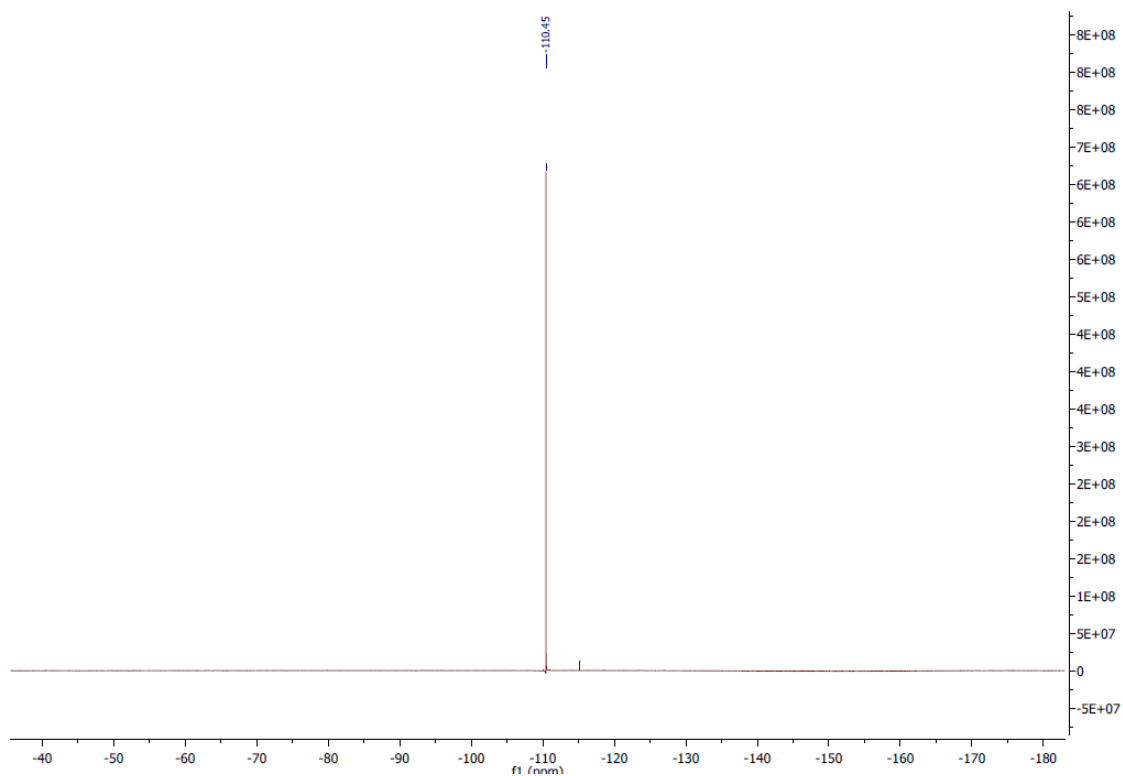**N-(6-chloro-3-formylquinolin-2-yl)-4-methyl-N-(phenanthren-9-yl)benzenesulfonamide 4c**<sup>1</sup>H NMR:

## SUPPORTING INFORMATION

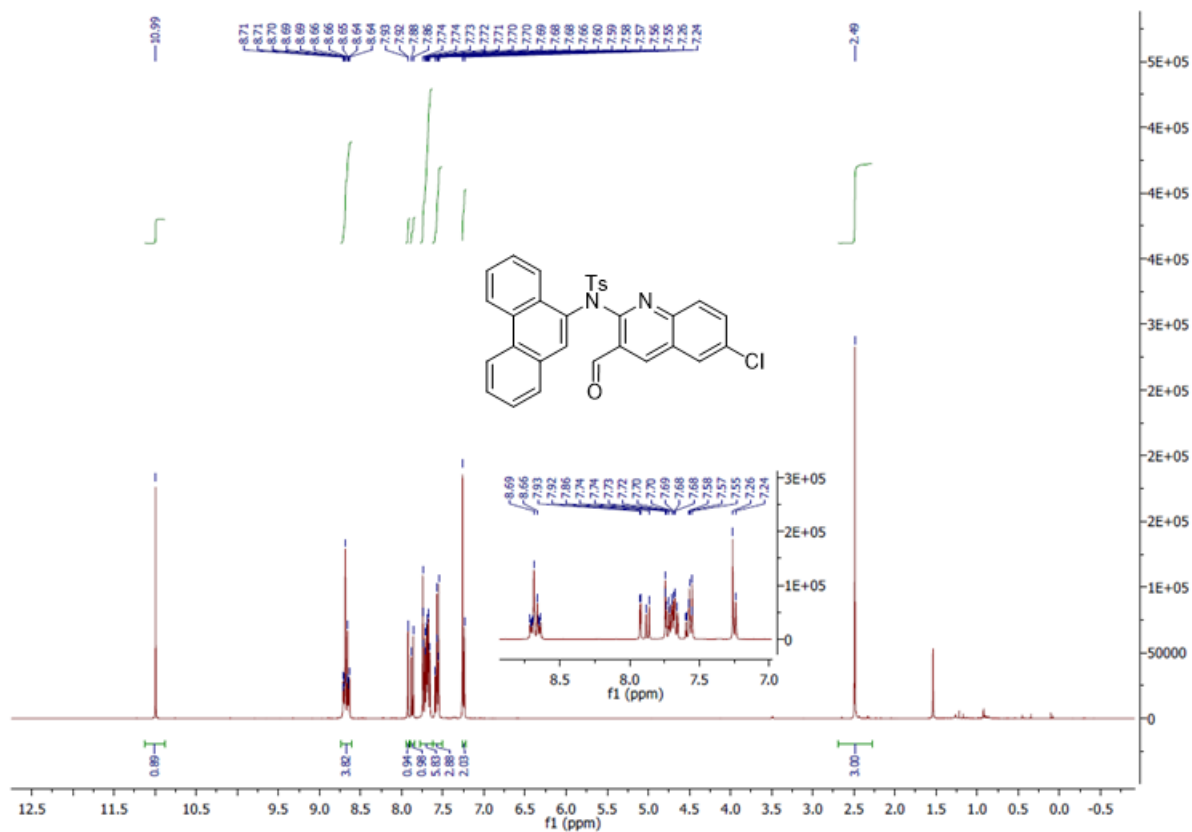**<sup>13</sup>C NMR:**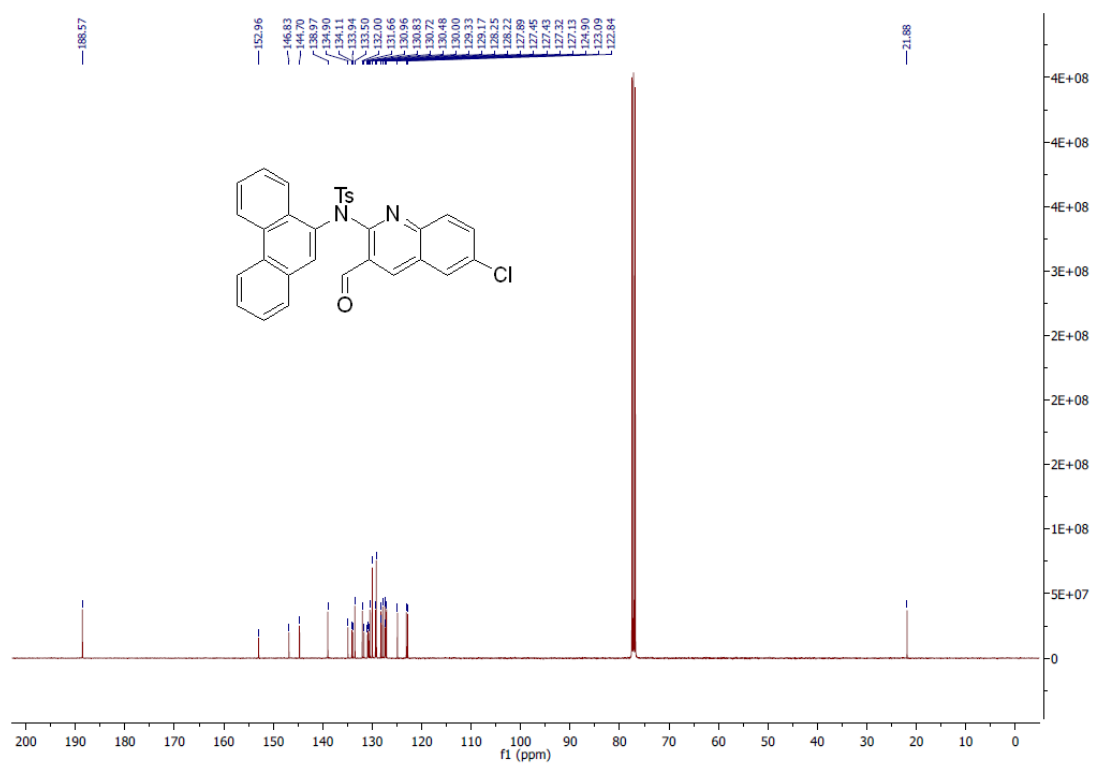**N-(6-bromo-3-formylquinolin-2-yl)-4-methyl-N-(phenanthren-9-yl)benzenesulfonamide 4d****<sup>1</sup>H NMR:**





## SUPPORTING INFORMATION

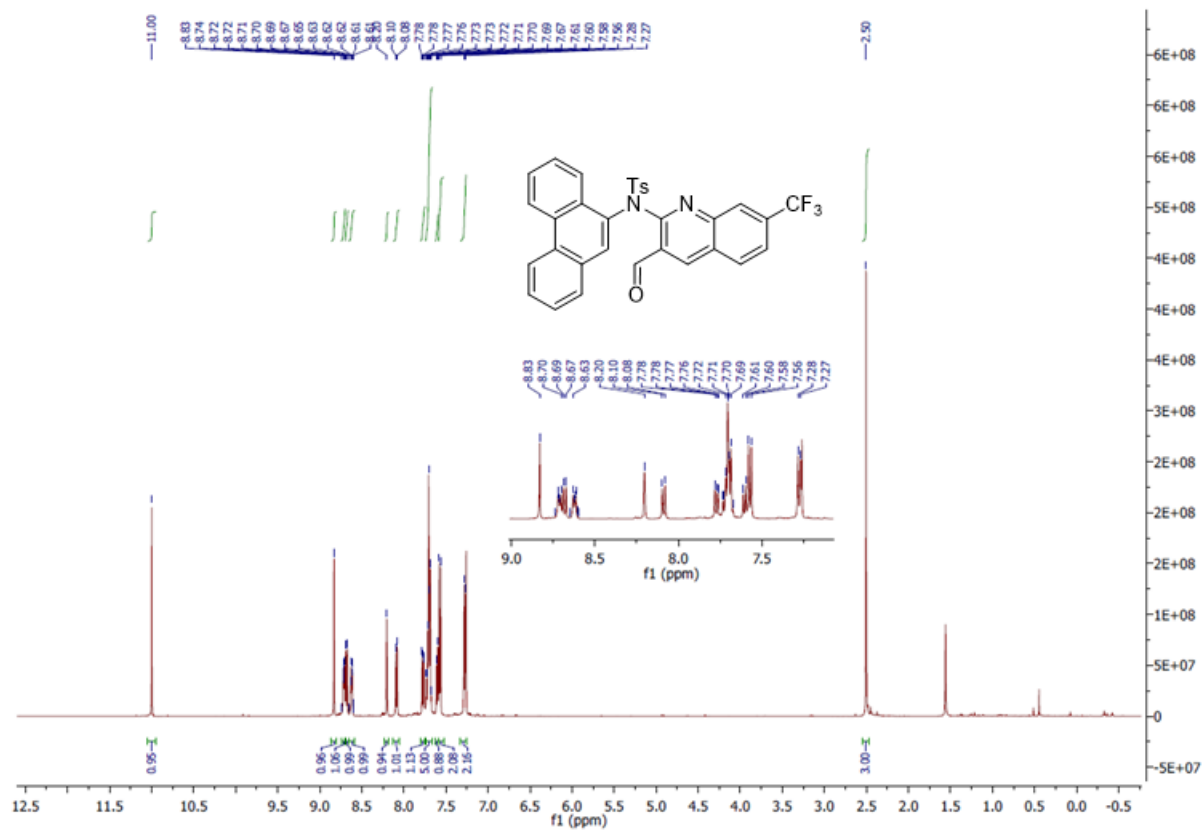<sup>13</sup>C NMR: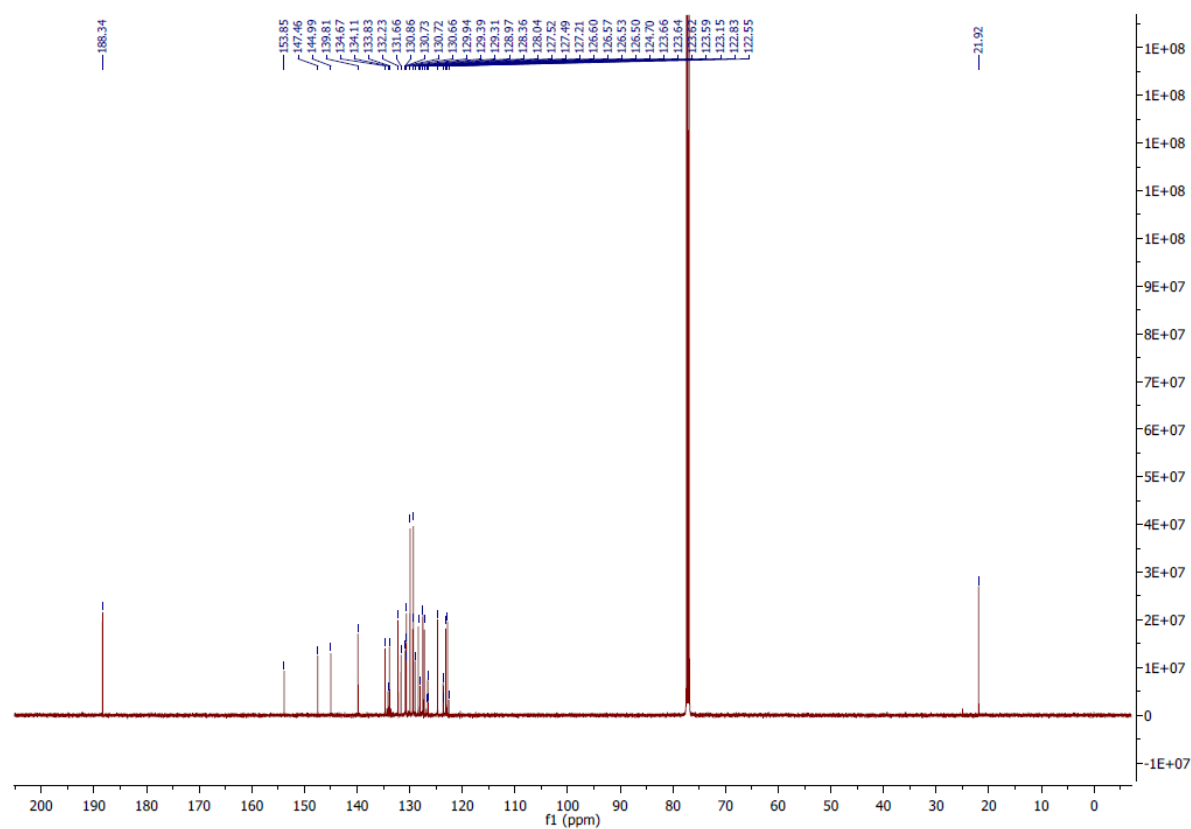<sup>19</sup>F NMR:



## SUPPORTING INFORMATION

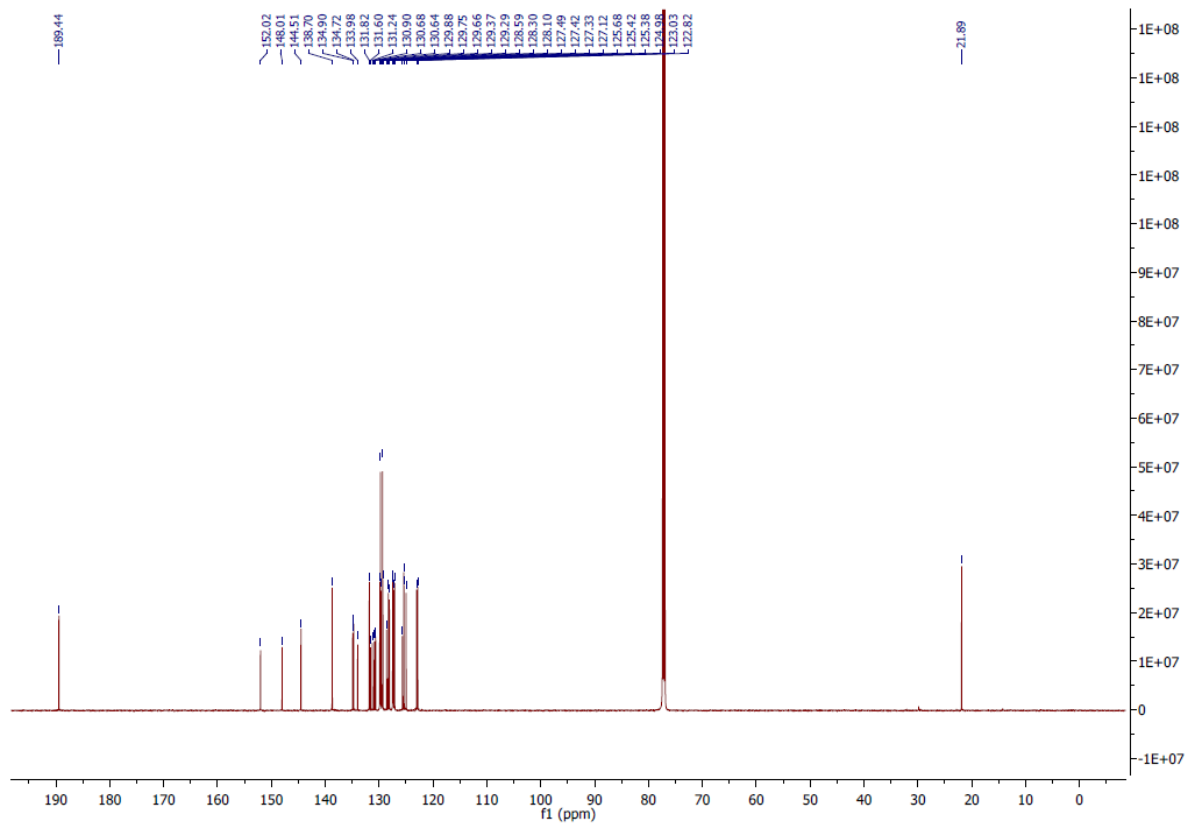

## N-(3-formylbenzo[h]quinolin-2-yl)-4-methyl-N-(naphthalen-2-yl)benzenesulfonamide 4h

<sup>1</sup>H NMR: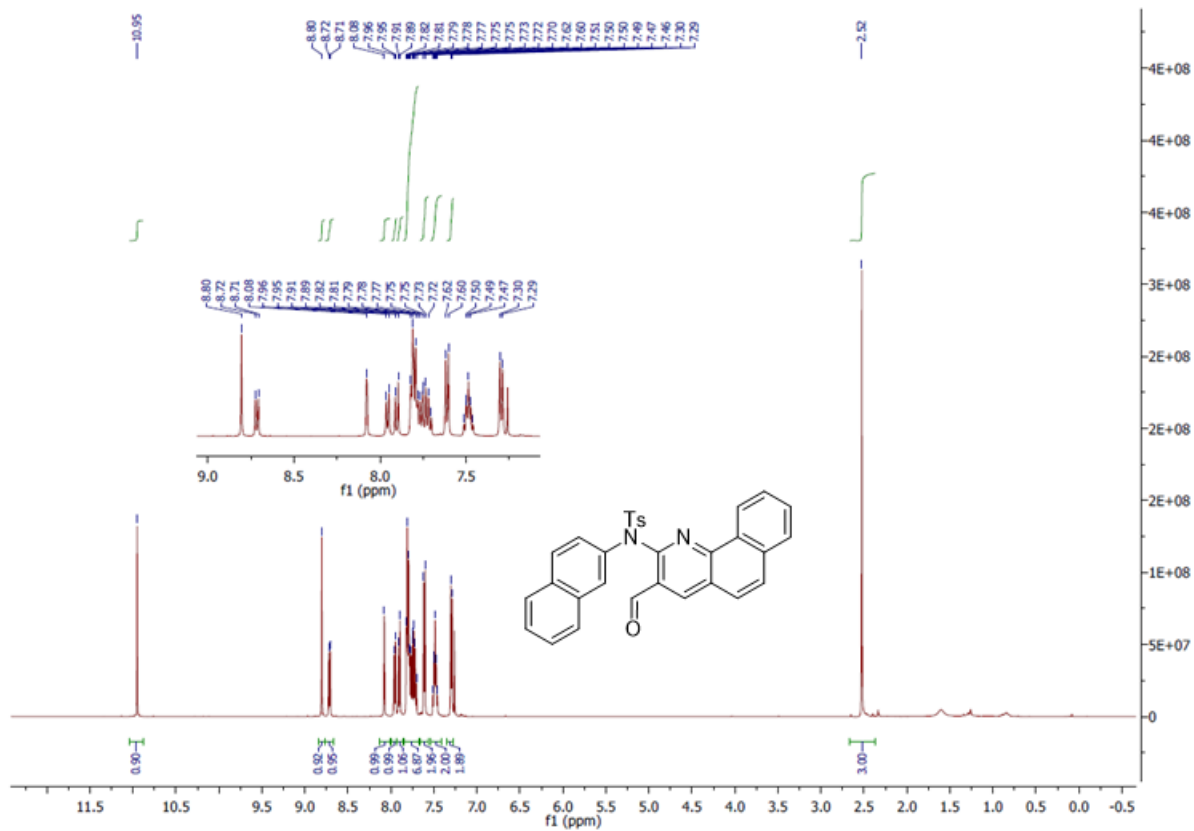

## SUPPORTING INFORMATION

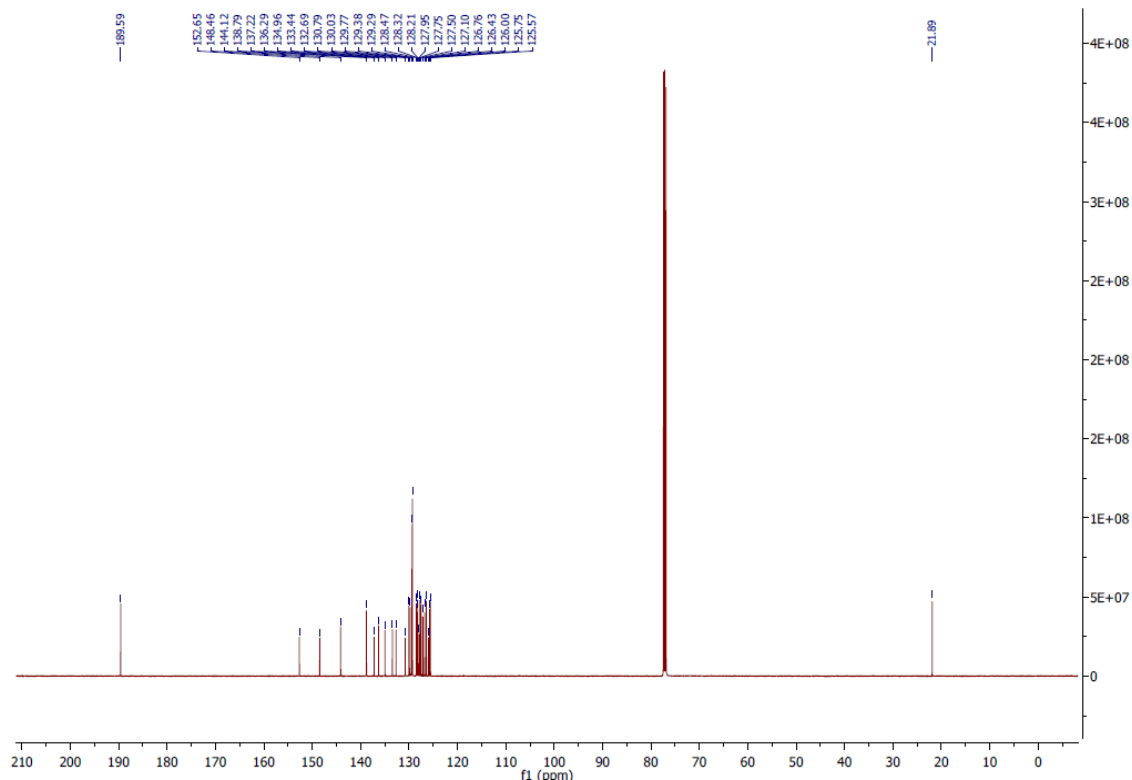

**N,N'-(2,7-di-tert-butylpyrene-4,9-diyl)bis(N-(3-formylquinolin-2-yl)-4-methylbenzenesulfonamide) 10a**

$^1\text{H}$  NMR:

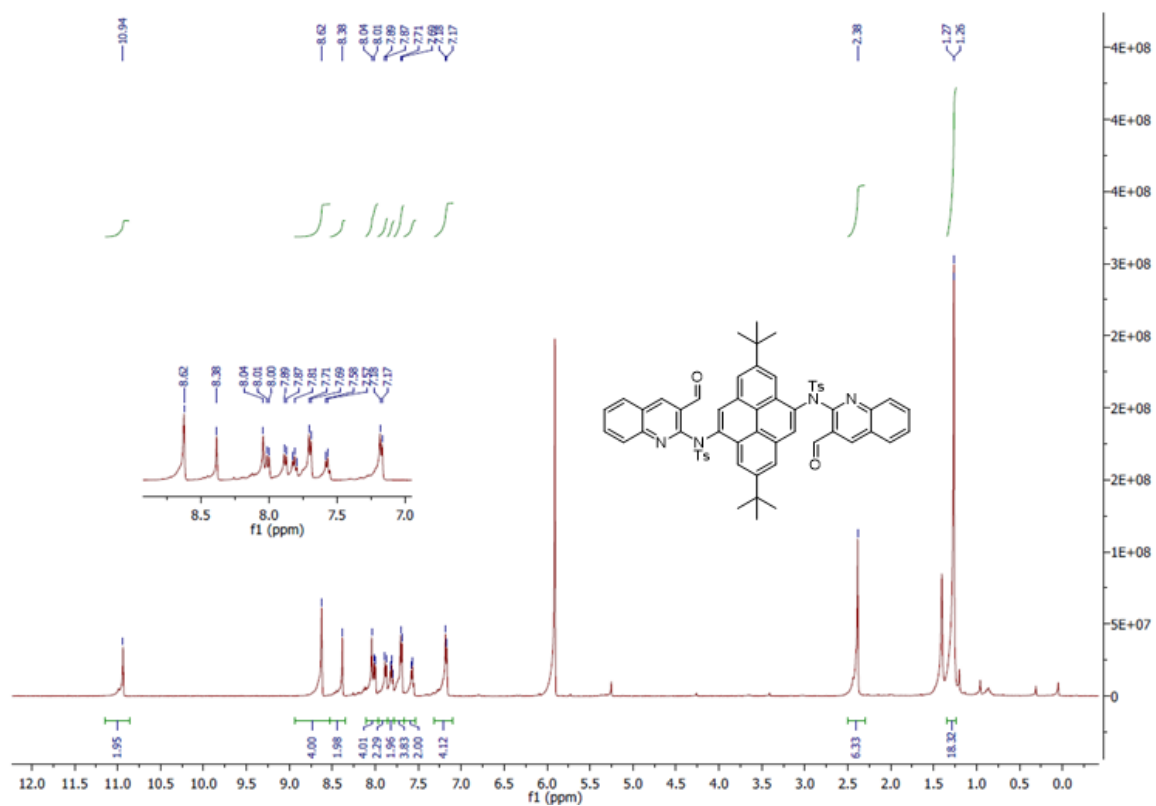

**N,N'-(2,7-di-tert-butylpyrene-4,9-diyl)bis(N-(3-formyl-6-pentylquinolin-2-yl)-4-methylbenzenesulfonamide) 10b**

$^1\text{H}$  NMR:



## SUPPORTING INFORMATION

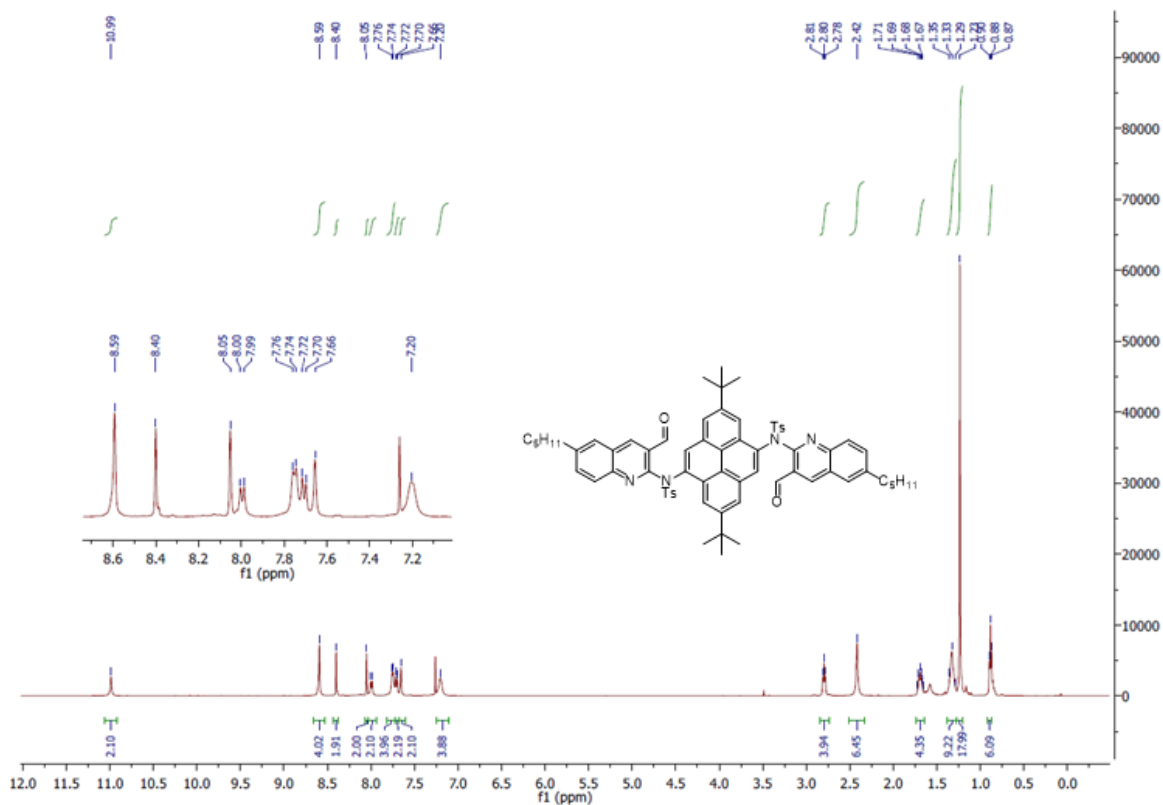<sup>13</sup>C NMR: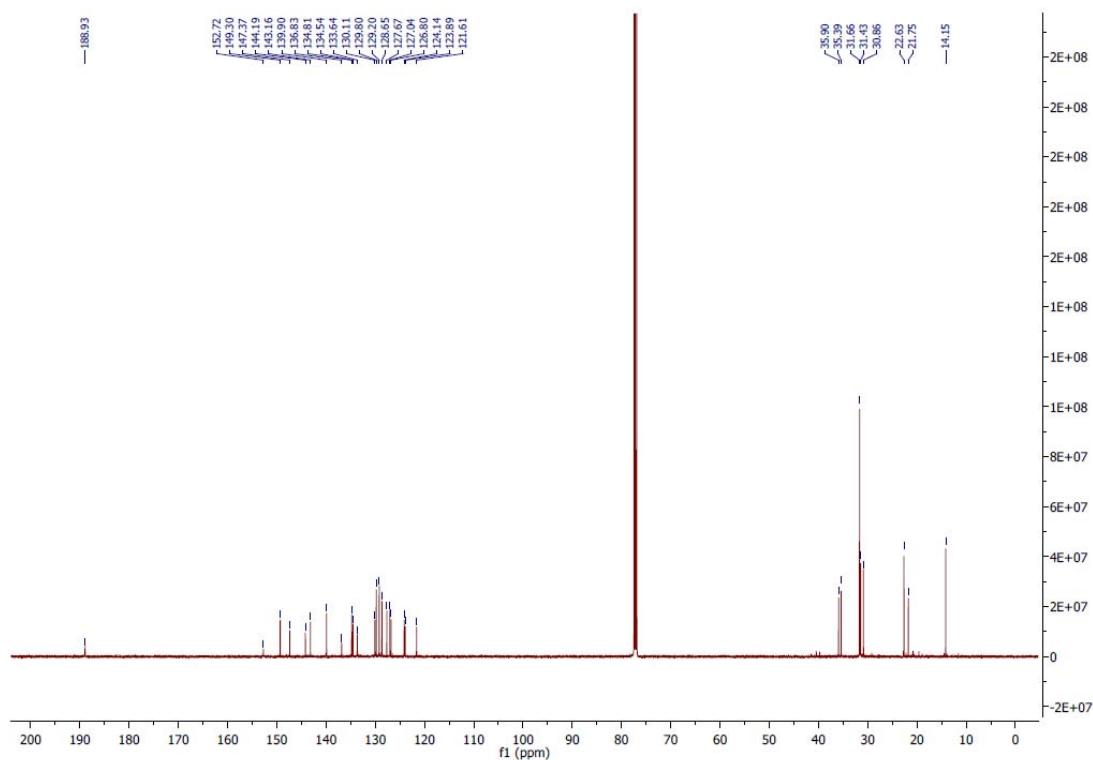

**N,N'-(2,7-di-tert-butylpyrene-4,9-diyl)bis(N-(3-formyl-6-octylquinolin-2-yl)-4-methylbenzenesulfonamide) 10c**  
<sup>1</sup>H NMR:

## SUPPORTING INFORMATION

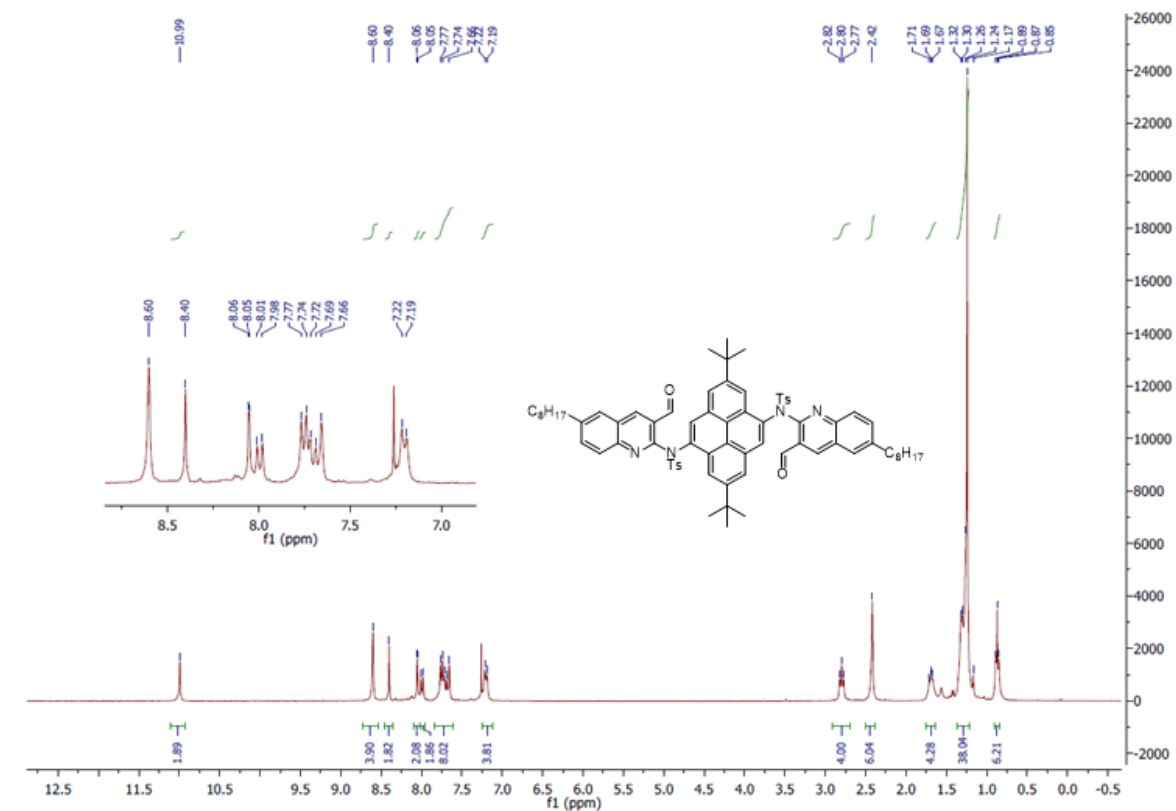**<sup>13</sup>C NMR:**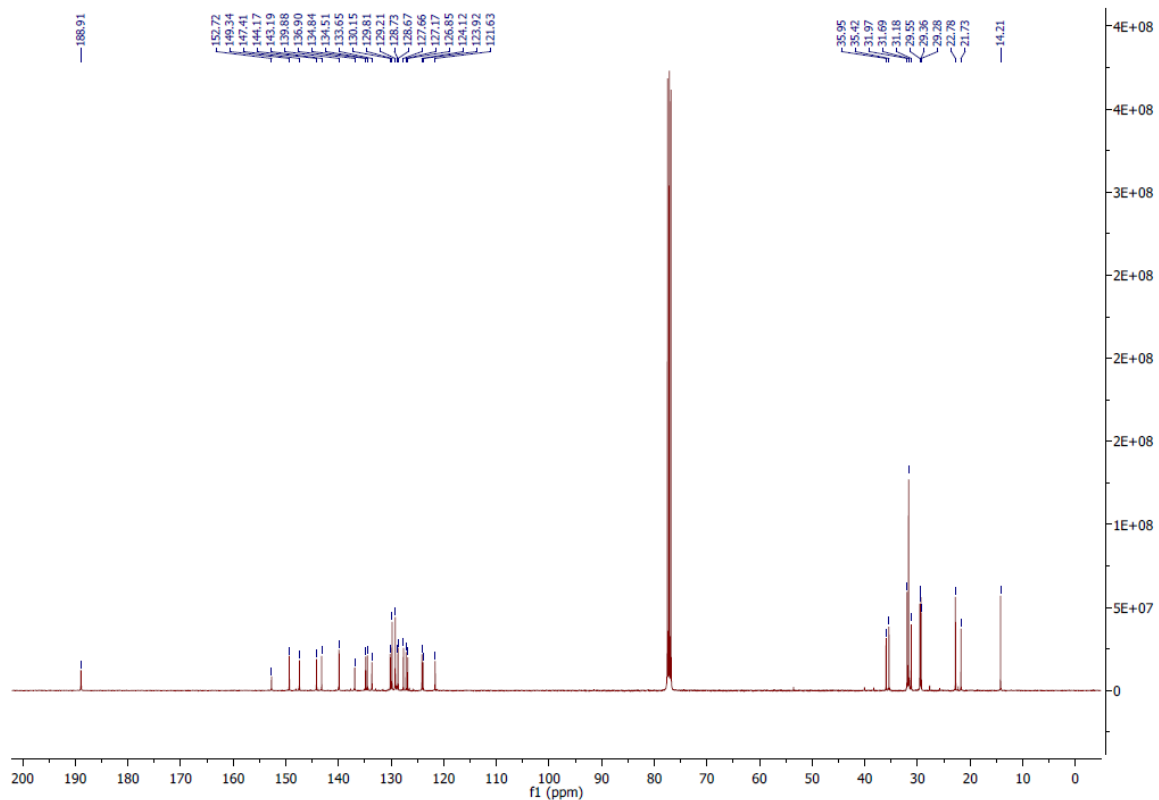**N,N'-(2,7-di-tert-butylpyrene-4,9-diyl)bis(N-(6-dodecyl-3-formylquinolin-2-yl)-4-methylbenzenesulfonamide) 10d****<sup>1</sup>H NMR:**

## SUPPORTING INFORMATION

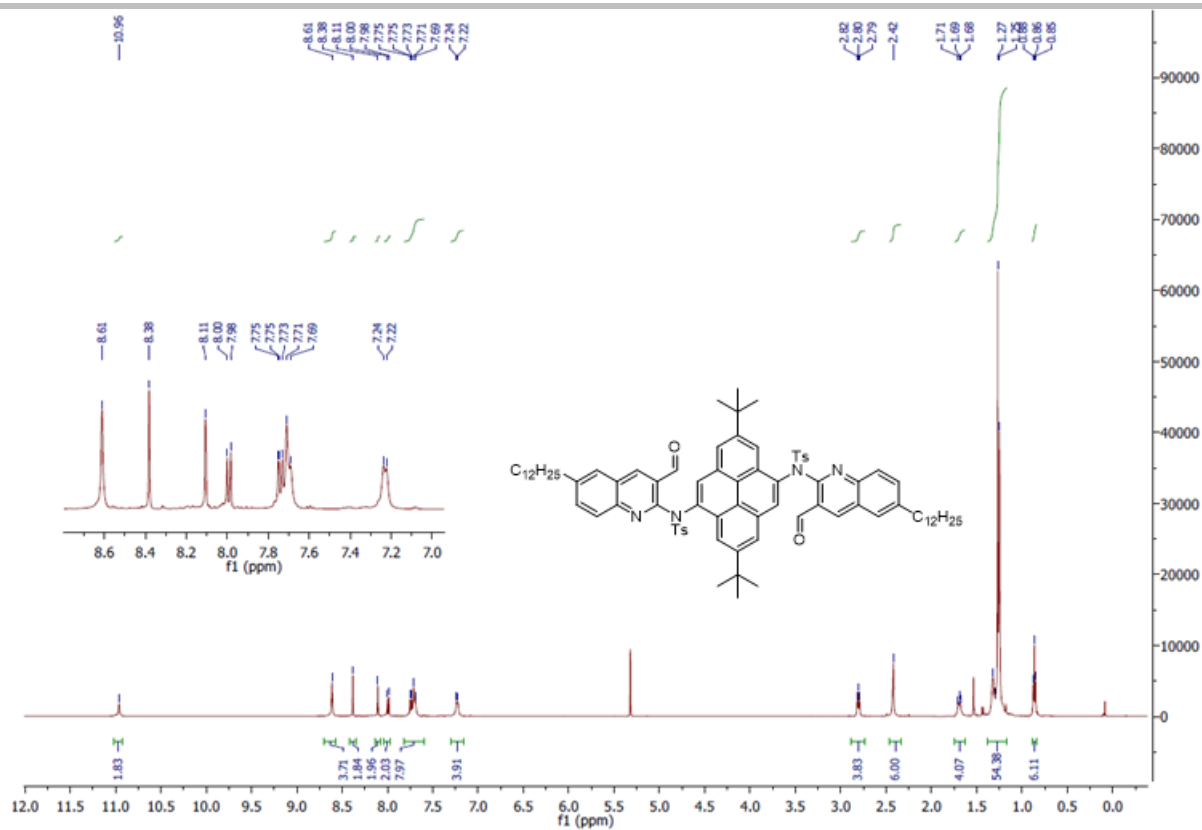<sup>13</sup>C NMR: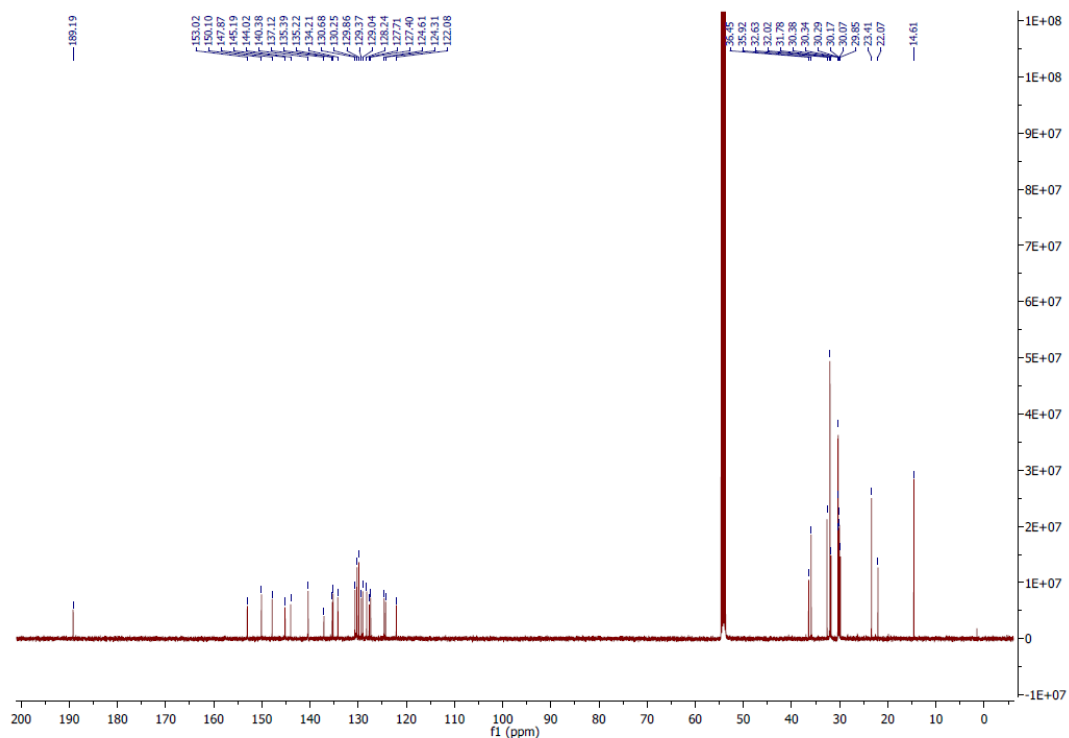

## 5.3. NMR of Naphthyrindines 5a-h and 11c-d

benzo[b]phenanthro[9,10-g][1,8]naphthyrindine 5a

<sup>1</sup>H NMR:





## SUPPORTING INFORMATION

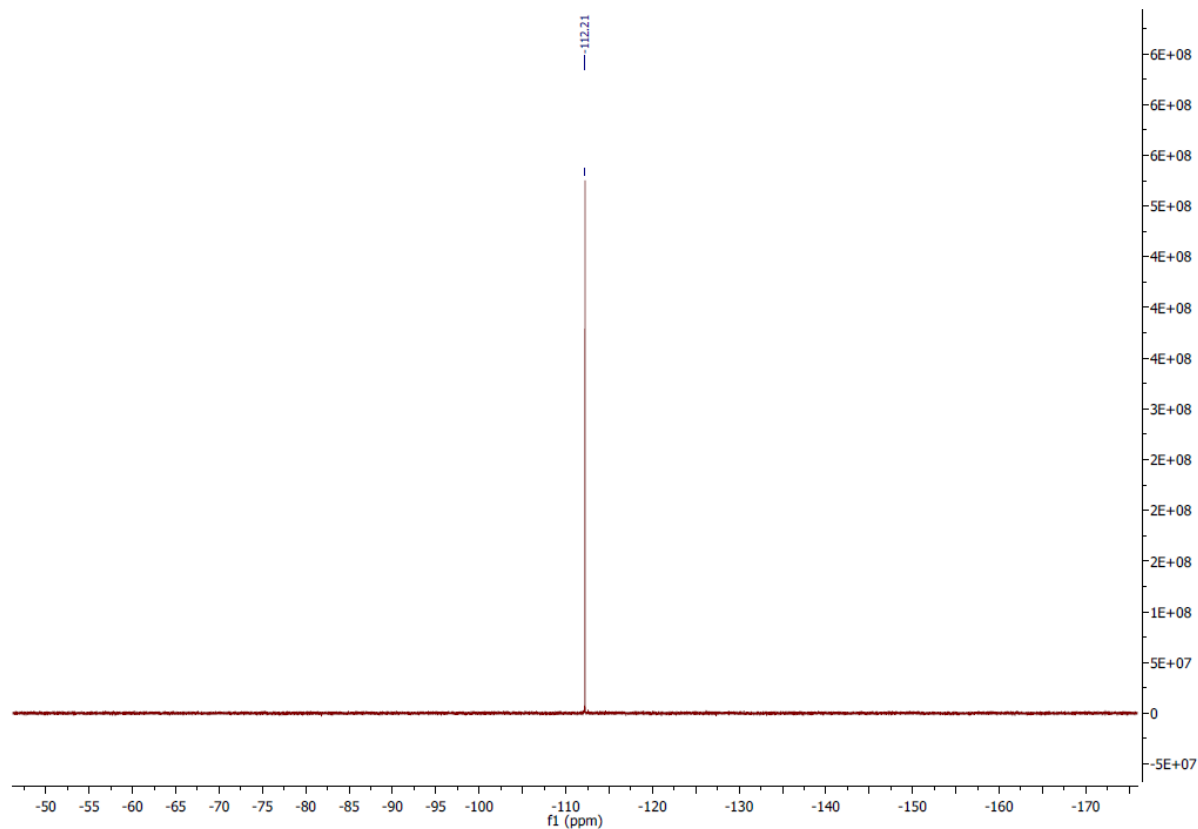**13-chlorobenzo[b]phenanthro[9,10-g][1,8]naphthyridine 5c**<sup>1</sup>H NMR: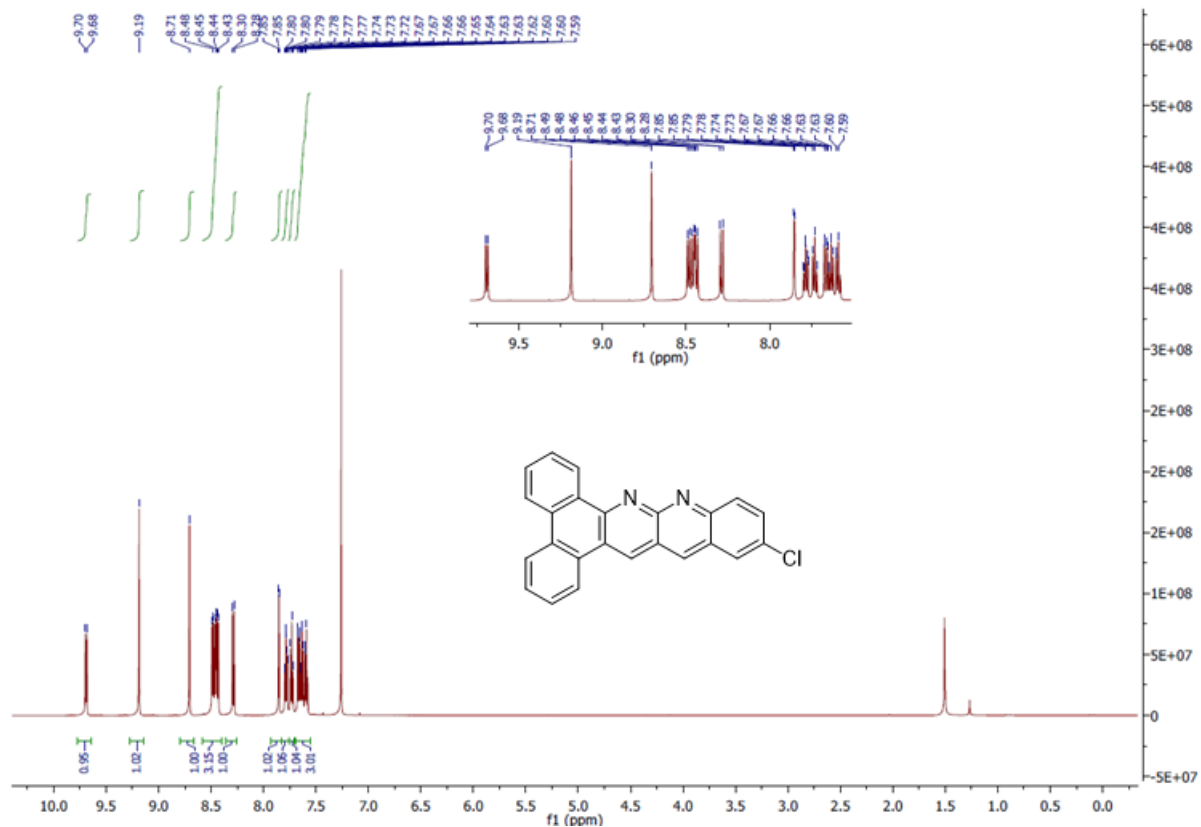<sup>13</sup>C NMR:

## SUPPORTING INFORMATION

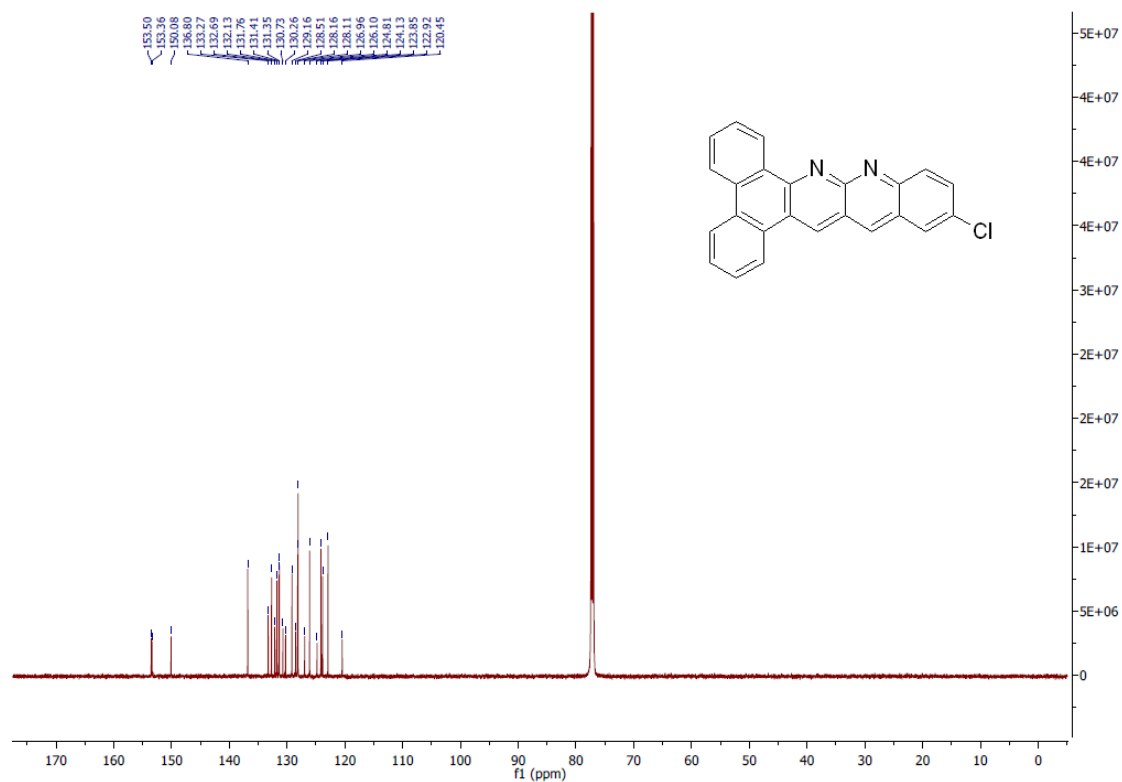**13-bromobenzo[b]phenanthro[9,10-g][1,8]naphthyridine 5d**<sup>1</sup>H NMR: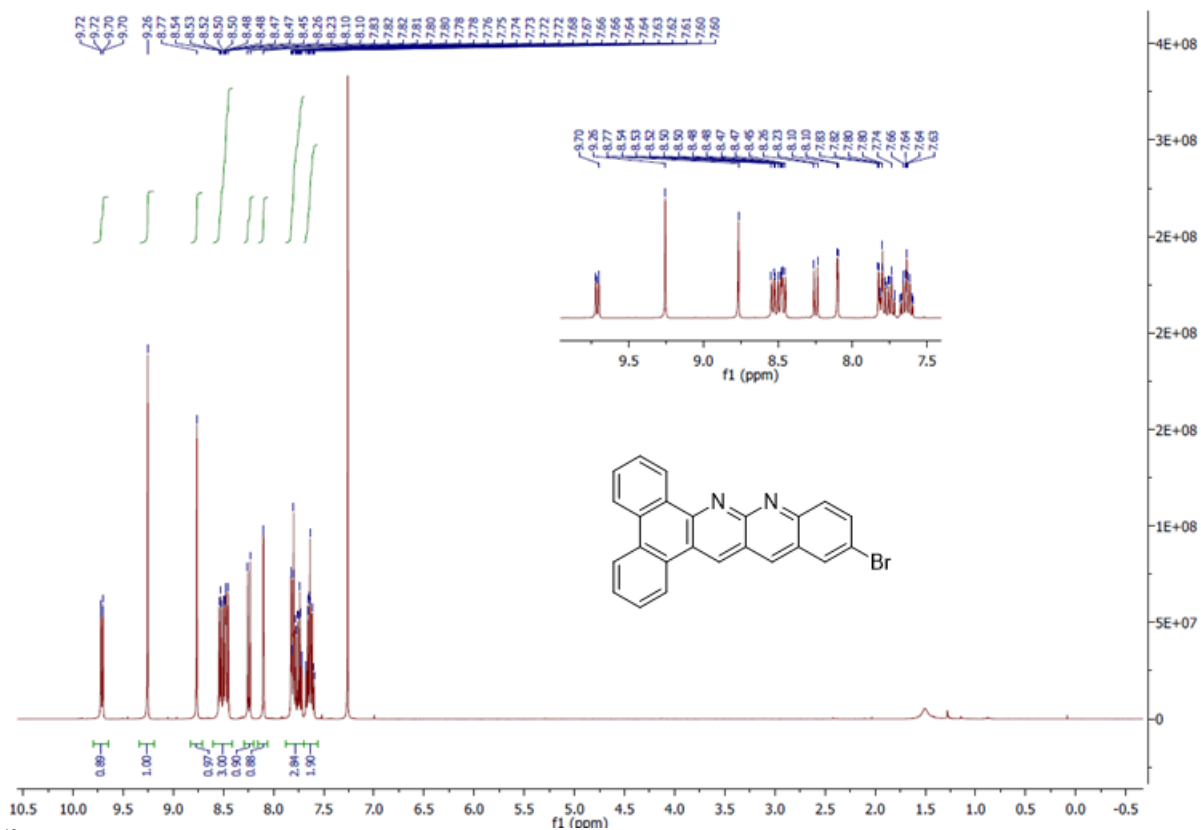<sup>13</sup>C NMR:

## SUPPORTING INFORMATION

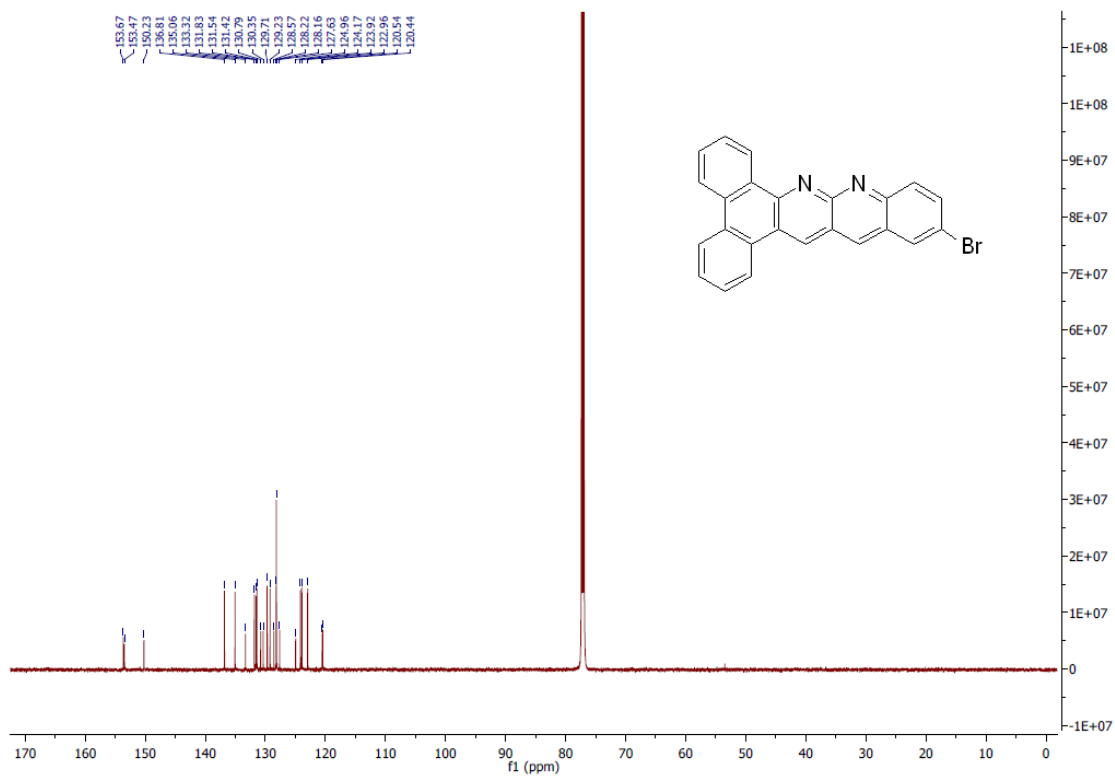

## 13-methoxybenzo[b]phenanthro[9,10-g][1,8]naphthyridine 5e

<sup>1</sup>H NMR: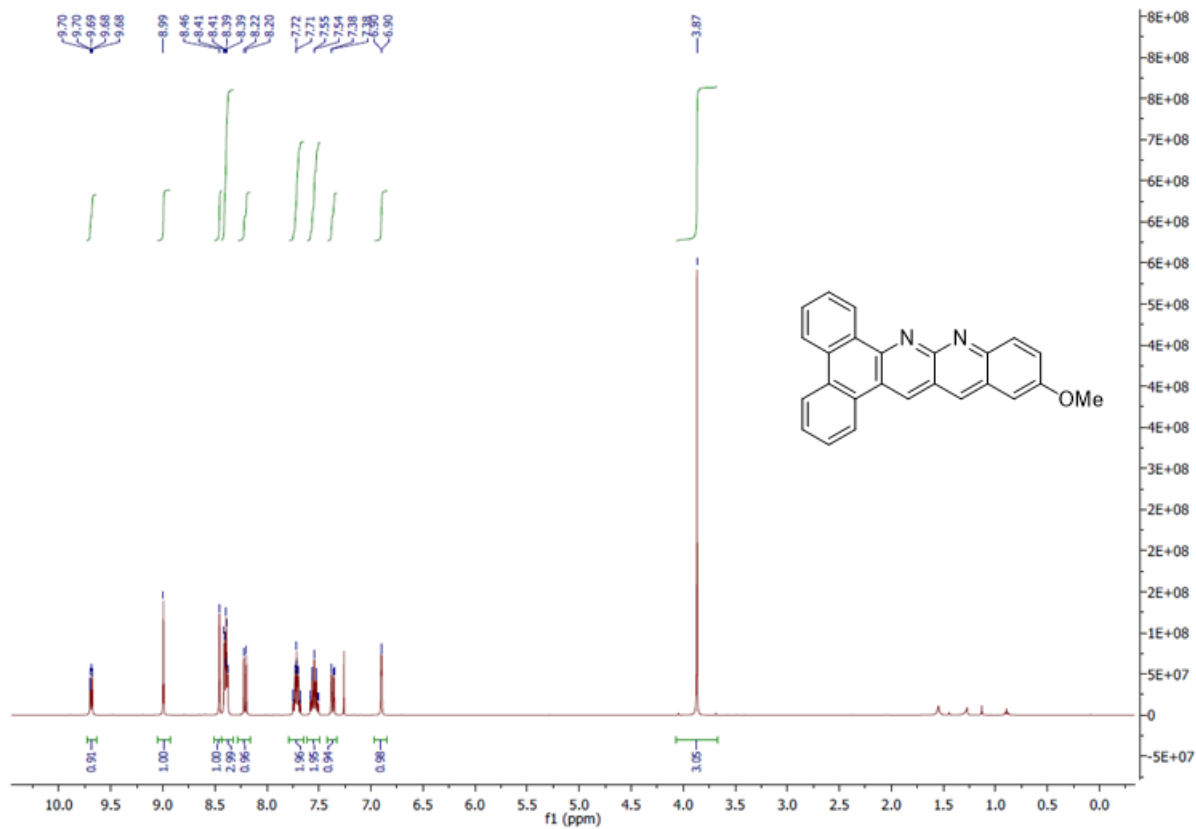<sup>13</sup>C NMR:



## SUPPORTING INFORMATION

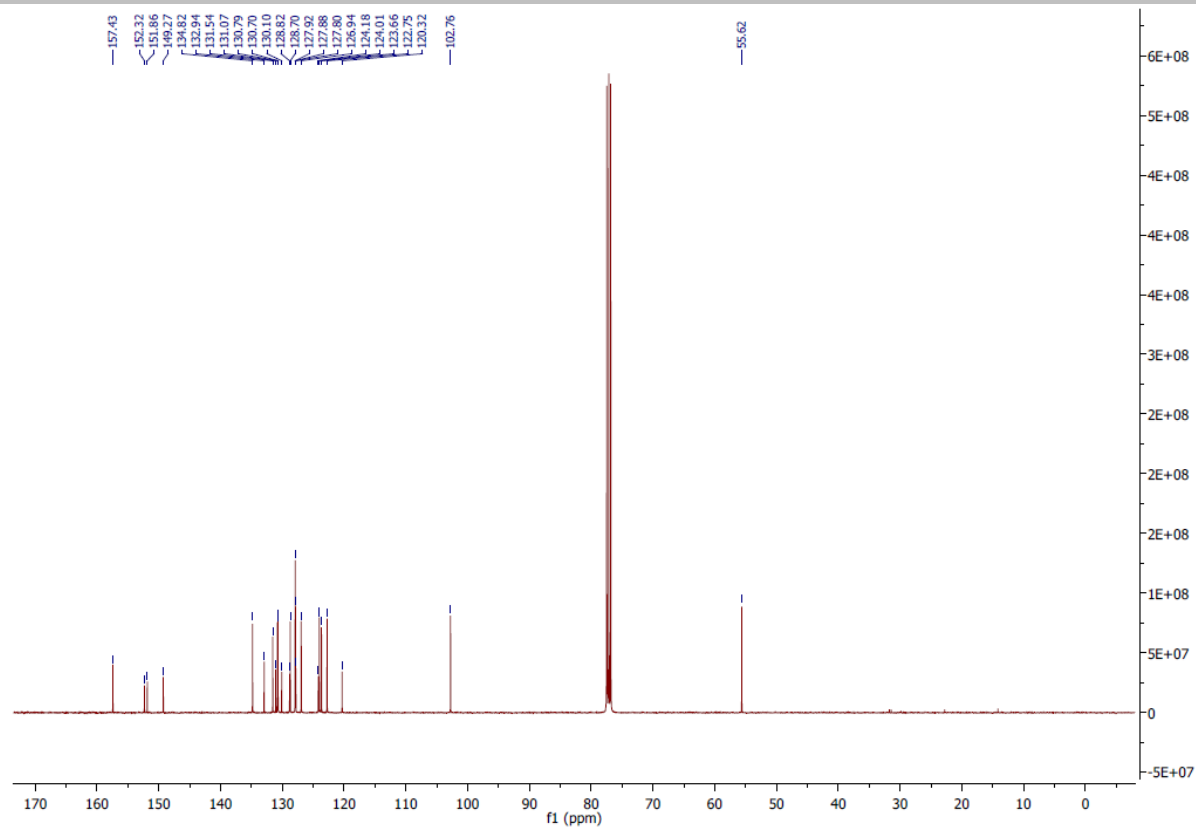**12-(trifluoromethyl)benzo[b]phenanthro[9,10-g][1,8]naphthyridine 5f**<sup>1</sup>H NMR: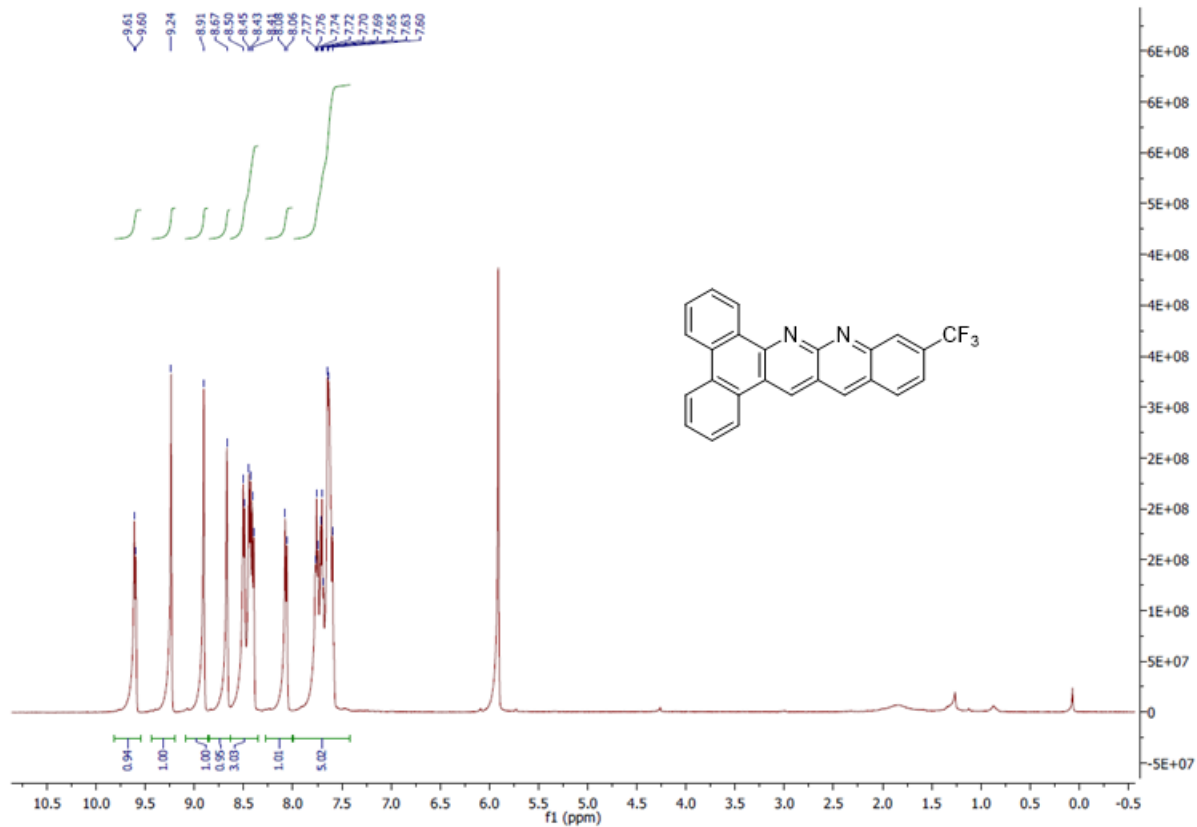<sup>13</sup>C NMR:

## SUPPORTING INFORMATION

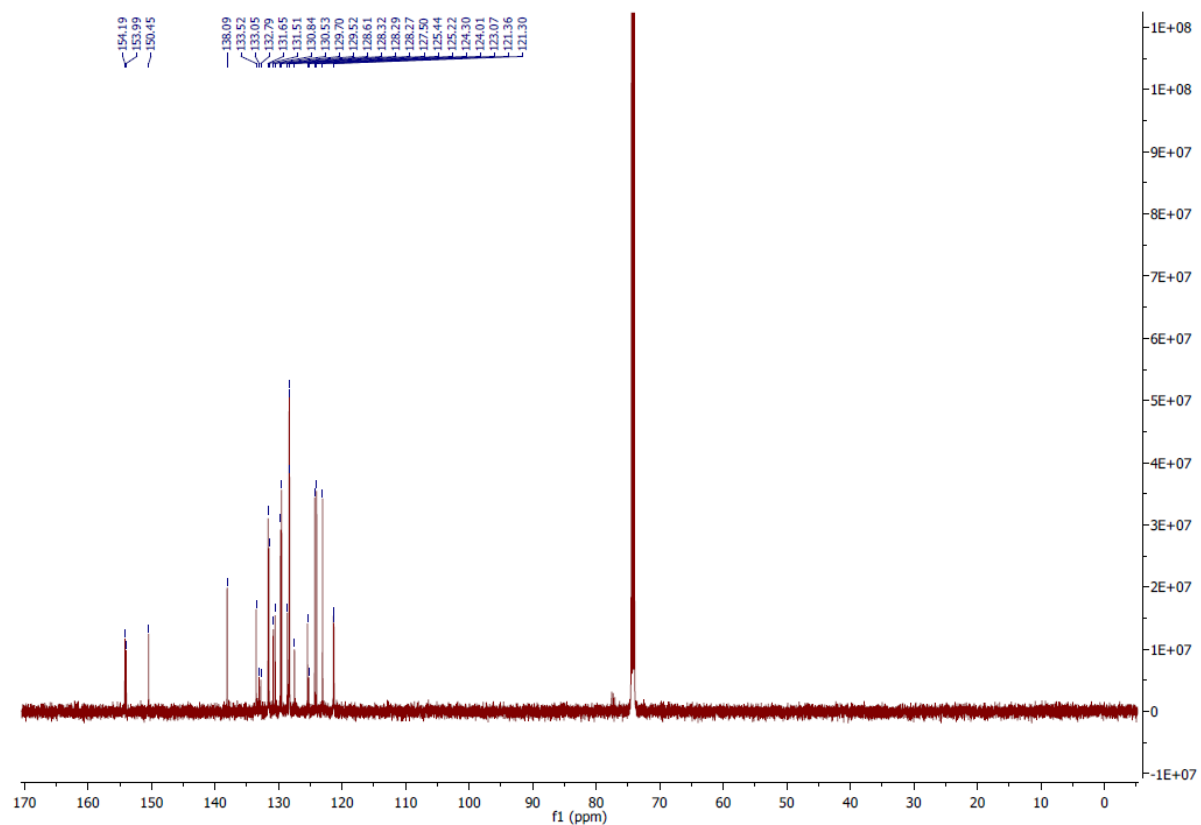

<sup>19</sup>F NMR:

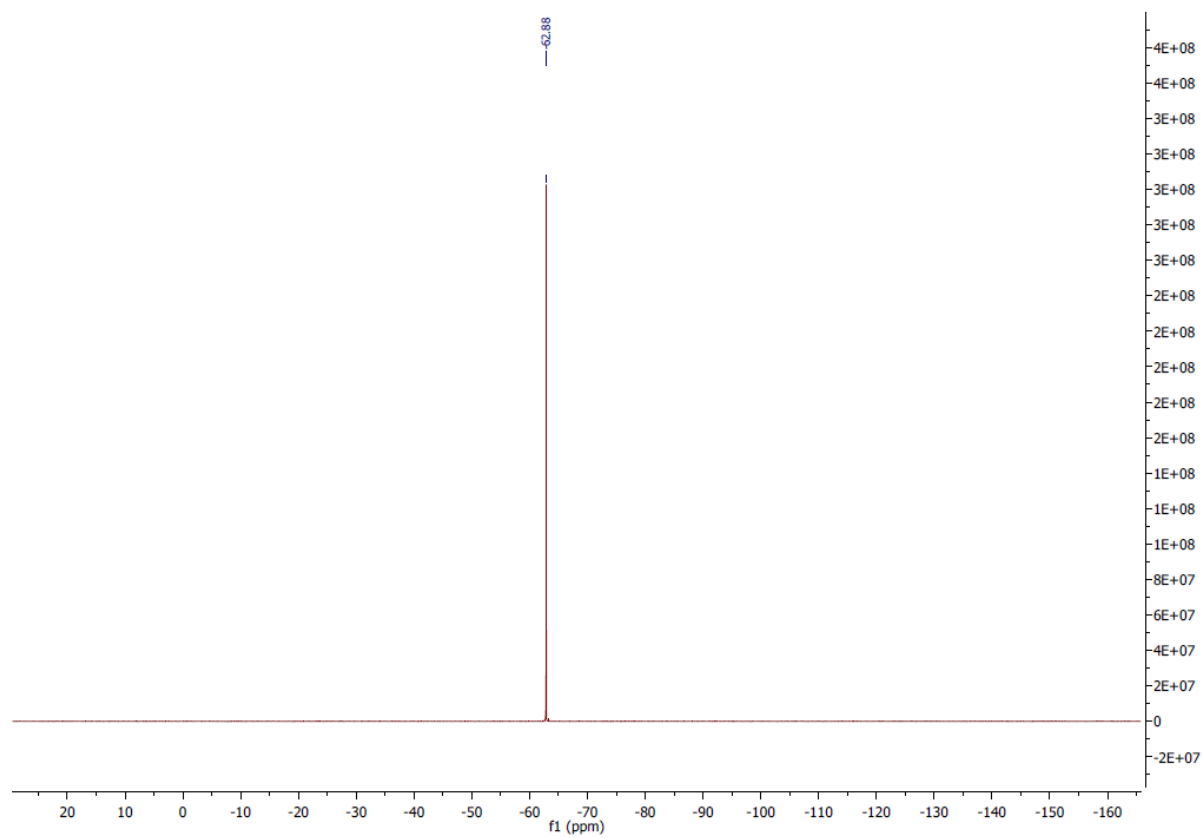

naphtho[1,2-b]phenanthro[9,10-g][1,8]naphthyridine 5g

<sup>1</sup>H NMR:

## SUPPORTING INFORMATION

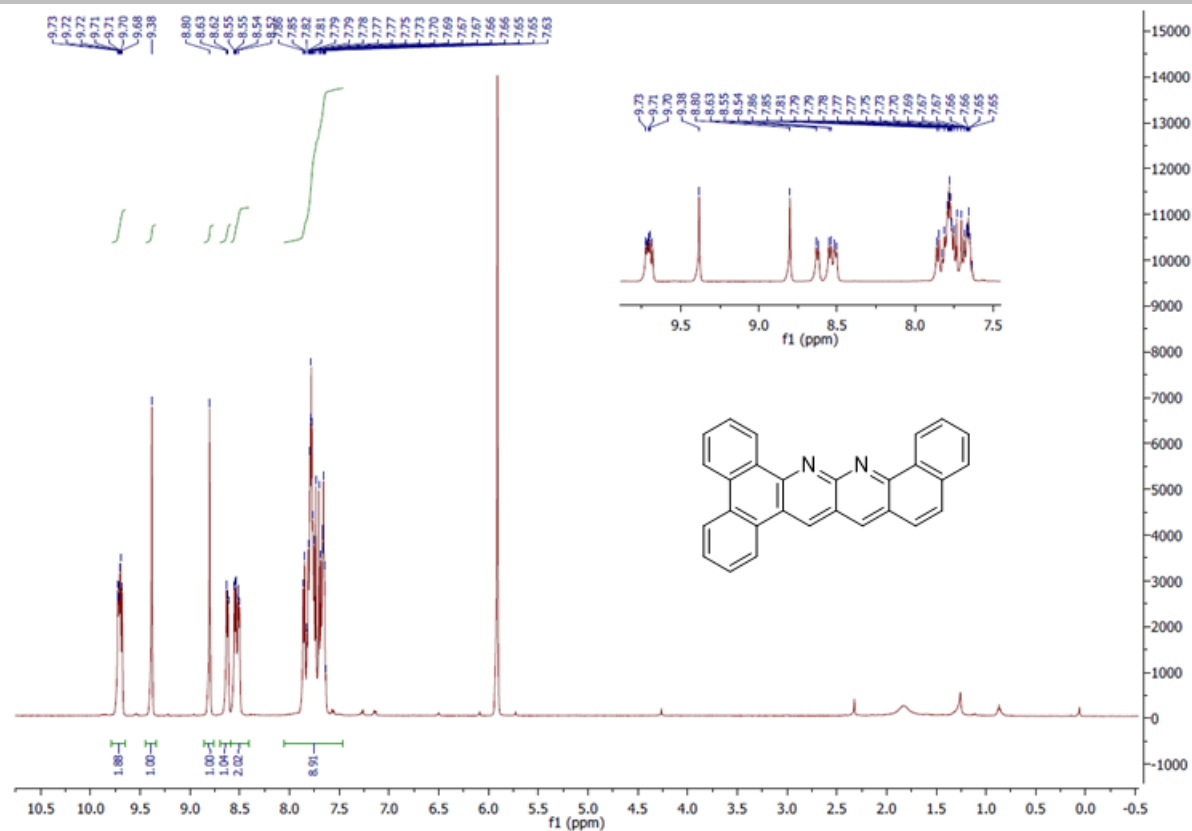<sup>13</sup>C NMR: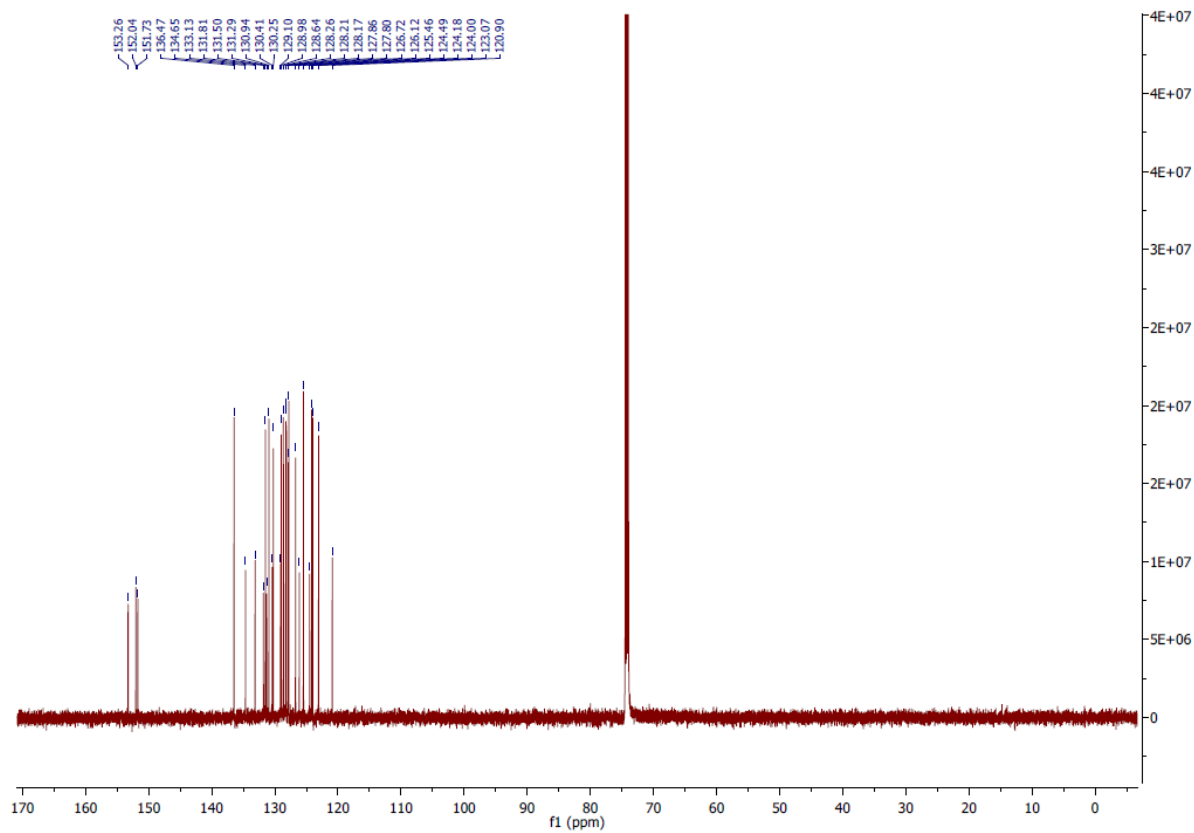

dinaphtho[1,2-b:1',2'-g][1,8]naphthyridine 5h

<sup>1</sup>H NMR:

## SUPPORTING INFORMATION

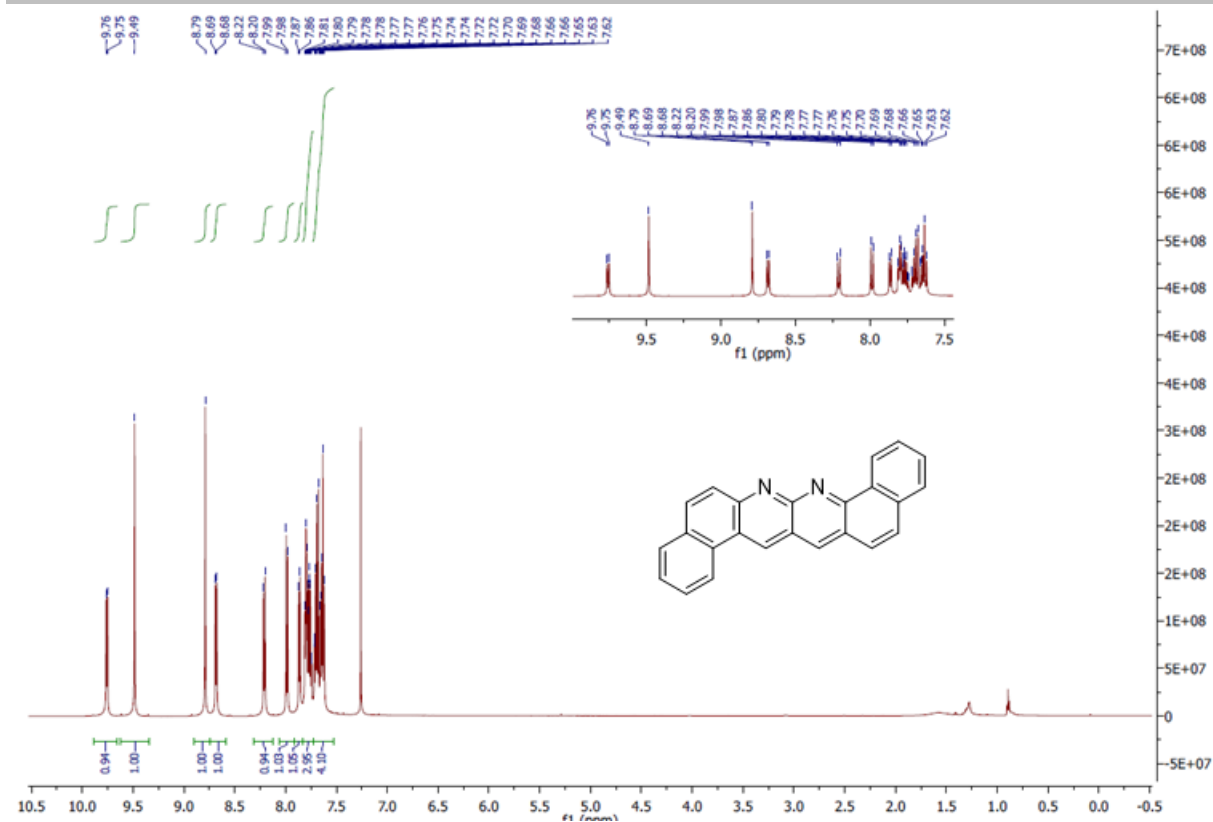**<sup>13</sup>C NMR:**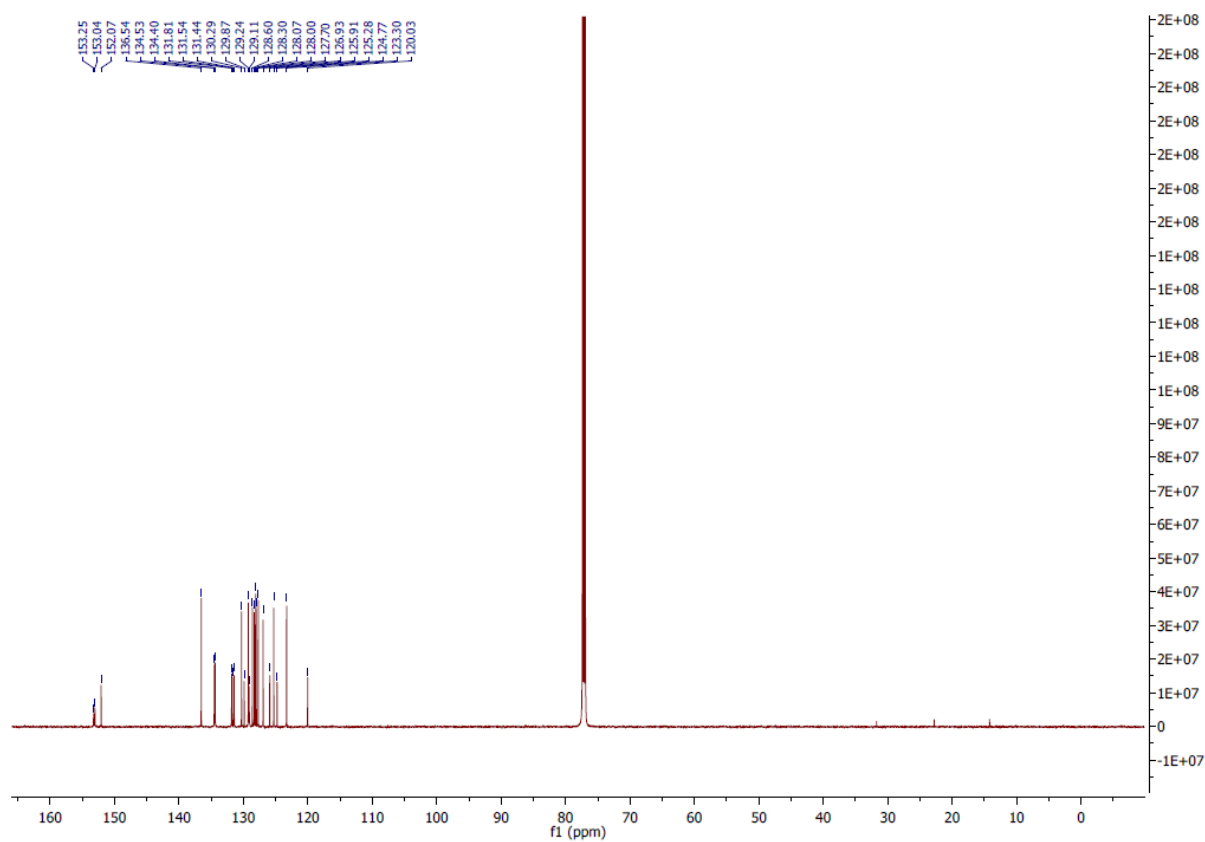**Compound 11c****<sup>1</sup>H NMR:**

## SUPPORTING INFORMATION

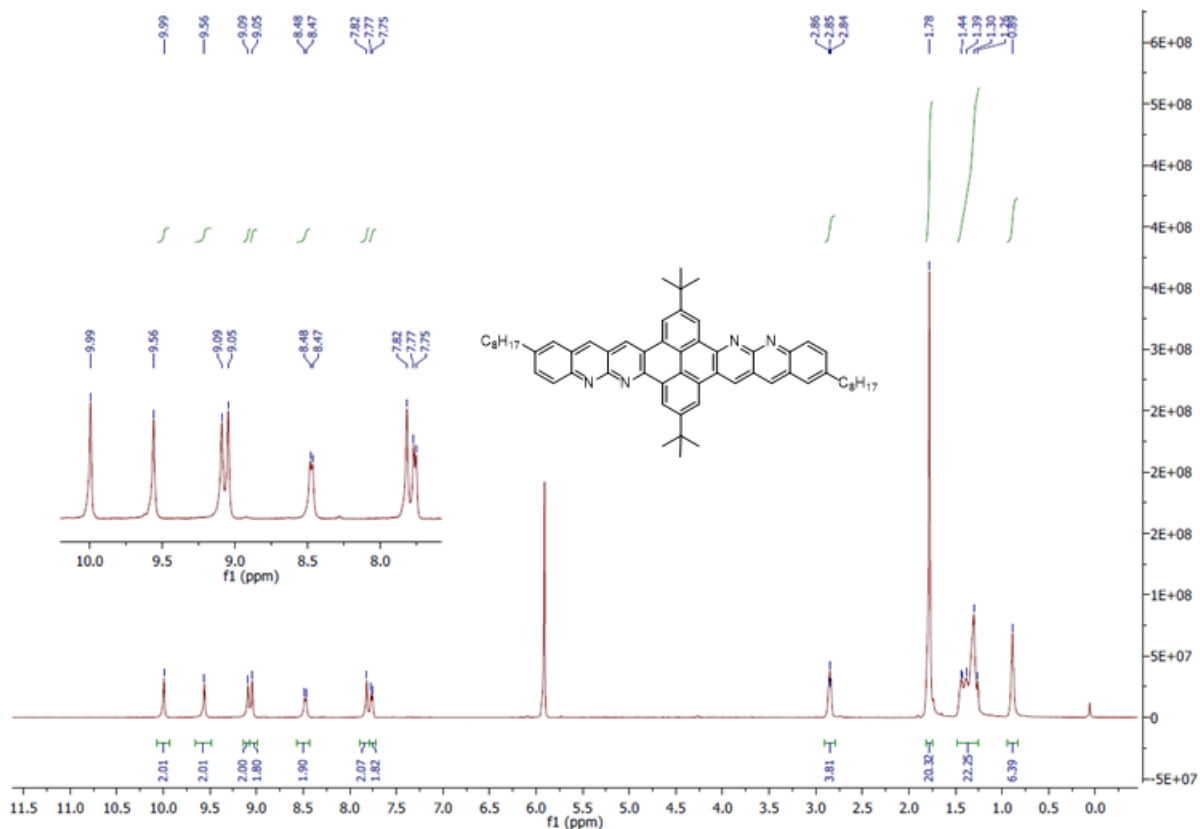**Compound 11d** $^1\text{H NMR}$ :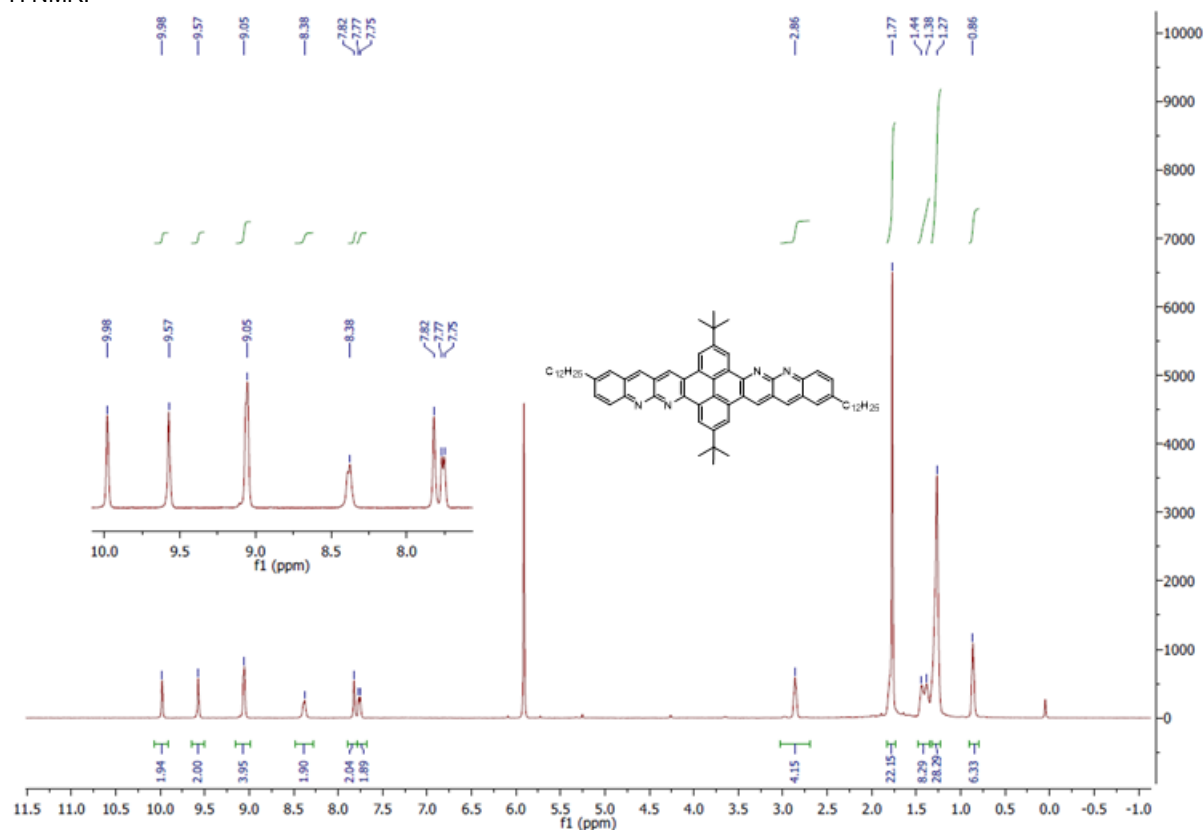

## SUPPORTING INFORMATION

## 6. X-ray crystal structures

## 6.1. Compound 11d

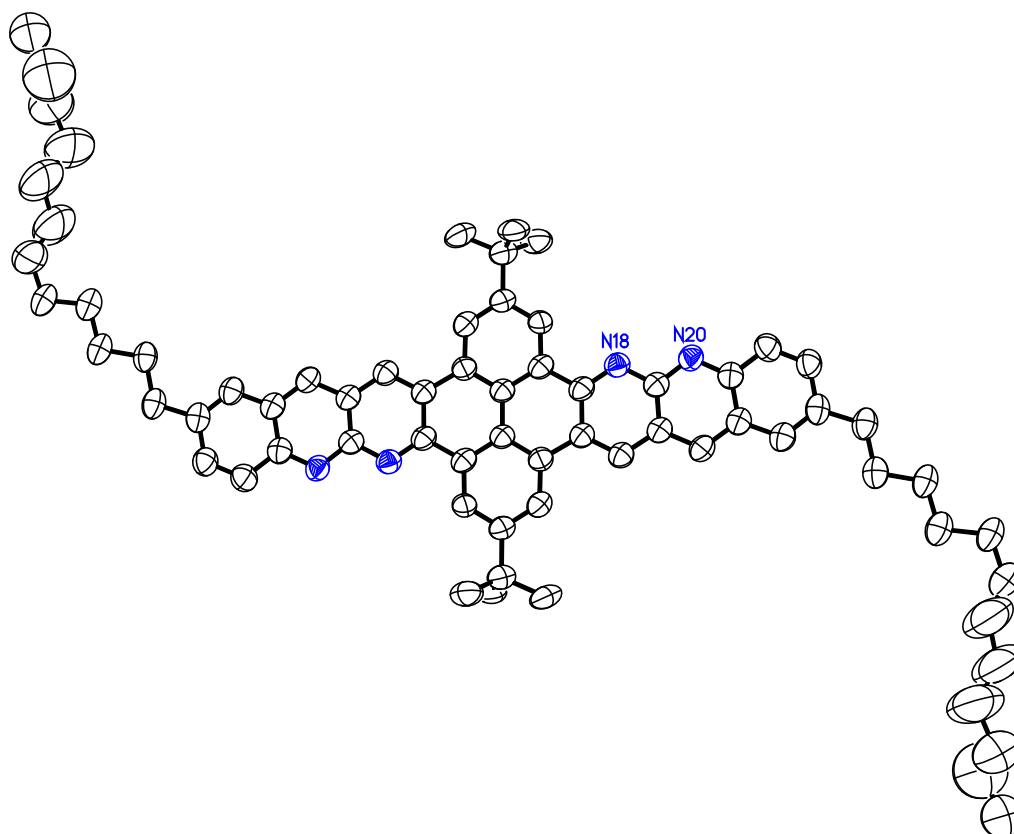

Figure S8: Crystal structure of 11d.

Table S2: Crystal data and structure refinement for 11d.

|                                 |                                          |                            |
|---------------------------------|------------------------------------------|----------------------------|
| Identification code             | stu8                                     |                            |
| Empirical formula               | $C_{70}H_{84}Cl_6N_4$                    |                            |
| Formula weight                  | 1194.11                                  |                            |
| Temperature                     | 200(2) K                                 |                            |
| Wavelength                      | 1.54178 Å                                |                            |
| Crystal system                  | triclinic                                |                            |
| Space group                     | $P \bar{1}$                              |                            |
| Z                               | 1                                        |                            |
| Unit cell dimensions            | a = 10.9165(9) Å                         | $\alpha = 96.115(9)$ deg.  |
|                                 | b = 11.0282(10) Å                        | $\beta = 103.041(9)$ deg.  |
|                                 | c = 15.7887(18) Å                        | $\gamma = 117.863(6)$ deg. |
| Volume                          | 1586.7(3) Å <sup>3</sup>                 |                            |
| Density (calculated)            | 1.25 g/cm <sup>3</sup>                   |                            |
| Absorption coefficient          | 2.80 mm <sup>-1</sup>                    |                            |
| Crystal shape                   | plate                                    |                            |
| Crystal size                    | 0.200 x 0.042 x 0.029 mm <sup>3</sup>    |                            |
| Crystal colour                  | orange                                   |                            |
| Theta range for data collection | 4.7 to 54.2 deg.                         |                            |
| Index ranges                    | -10 ≤ h ≤ 11, -11 ≤ k ≤ 11, -16 ≤ l ≤ 16 |                            |
| Reflections collected           | 10339                                    |                            |
| Independent reflections         | 3844 (R(int) = 0.0525)                   |                            |

## SUPPORTING INFORMATION

|                                      |                                    |
|--------------------------------------|------------------------------------|
| Observed reflections                 | 1895 ( $I > 2\sigma(I)$ )          |
| Absorption correction                | Semi-empirical from equivalents    |
| Max. and min. transmission           | 1.52 and 0.56                      |
| Refinement method                    | Full-matrix least-squares on $F^2$ |
| Data/restraints/parameters           | 3844 / 574 / 435                   |
| Goodness-of-fit on $F^2$             | 1.25                               |
| Final R indices ( $I > 2\sigma(I)$ ) | R1 = 0.123, wR2 = 0.327            |
| Largest diff. peak and hole          | 0.52 and -0.37 eÅ <sup>-3</sup>    |

**Table S3:** Atomic coordinates and equivalent isotropic displacement parameters (Å<sup>2</sup>) for **11d**.  $U_{eq}$  is defined as one third of the trace of the orthogonalized  $U_{ij}$  tensor.

| Atom | x           | y           | z          | $U_{eq}$   |
|------|-------------|-------------|------------|------------|
| C11  | -0.0175(7)  | 0.4800(6)   | 0.4520(4)  | 0.0562(16) |
| C12  | 0.0879(7)   | 0.5468(6)   | 0.4098(4)  | 0.0580(17) |
| C13  | 0.0492(7)   | 0.5065(7)   | 0.3158(4)  | 0.0646(18) |
| H13  | 0.1213      | 0.5533      | 0.2880     | 0.078      |
| C14  | -0.0881(7)  | 0.4025(7)   | 0.2623(4)  | 0.0676(19) |
| C15  | -0.1912(7)  | 0.3347(7)   | 0.3043(4)  | 0.0641(18) |
| H15  | -0.2861     | 0.2607      | 0.2689     | 0.077      |
| C16  | -0.1593(7)  | 0.3721(6)   | 0.3975(4)  | 0.0580(16) |
| C17  | -0.2718(7)  | 0.2995(7)   | 0.4390(4)  | 0.0605(17) |
| N18  | -0.4025(6)  | 0.1984(5)   | 0.3856(3)  | 0.0627(15) |
| C19  | -0.5110(7)  | 0.1318(7)   | 0.4218(4)  | 0.0604(17) |
| N20  | -0.6410(6)  | 0.0323(6)   | 0.3622(3)  | 0.0664(16) |
| C21  | -0.7532(7)  | -0.0338(6)  | 0.3934(4)  | 0.0632(17) |
| C22  | -0.8910(7)  | -0.1390(7)  | 0.3313(5)  | 0.077(2)   |
| H22  | -0.9009     | -0.1603     | 0.2694     | 0.092      |
| C23  | -1.0082(8)  | -0.2091(7)  | 0.3594(5)  | 0.076(2)   |
| H23  | -1.0986     | -0.2787     | 0.3164     | 0.091      |
| C24  | -1.0007(7)  | -0.1822(7)  | 0.4511(5)  | 0.0675(18) |
| C25  | -0.8695(7)  | -0.0841(7)  | 0.5124(5)  | 0.0682(18) |
| H25  | -0.8624     | -0.0657     | 0.5740     | 0.082      |
| C26  | -0.7435(7)  | -0.0092(6)  | 0.4864(5)  | 0.0622(17) |
| C27  | -0.6072(7)  | 0.0939(7)   | 0.5467(5)  | 0.0651(18) |
| H27  | -0.5947     | 0.1145      | 0.6091     | 0.078      |
| C28  | -0.4879(7)  | 0.1672(6)   | 0.5146(4)  | 0.0557(16) |
| C29  | -0.3468(7)  | 0.2738(6)   | 0.5712(4)  | 0.0625(17) |
| H29  | -0.3287     | 0.2984      | 0.6341     | 0.075      |
| C30  | -0.2375(7)  | 0.3406(6)   | 0.5358(4)  | 0.0583(17) |
| C31  | -1.1385(7)  | -0.2635(7)  | 0.4739(5)  | 0.076(2)   |
| H31A | -1.1758     | -0.3655     | 0.4509     | 0.091      |
| H31B | -1.2113     | -0.2424     | 0.4400     | 0.091      |
| C32  | -1.1334(7)  | -0.2399(7)  | 0.5717(4)  | 0.0714(19) |
| H32A | -1.0612     | -0.2603     | 0.6072     | 0.086      |
| H32B | -1.1013     | -0.1394     | 0.5955     | 0.086      |
| C33  | -1.2813(7)  | -0.3335(7)  | 0.5821(5)  | 0.077(2)   |
| H33A | -1.3521     | -0.3110     | 0.5471     | 0.092      |
| H33B | -1.3139     | -0.4333     | 0.5559     | 0.092      |
| C34  | -1.2855(8)  | -0.3198(8)  | 0.6767(5)  | 0.089(2)   |
| H34A | -1.2619     | -0.2226     | 0.7019     | 0.107      |
| H34B | -1.2104     | -0.3357     | 0.7134     | 0.107      |
| C35  | -1.4352(8)  | -0.4258(9)  | 0.6819(5)  | 0.099(3)   |
| H35A | -1.5113     | -0.4205     | 0.6373     | 0.119      |
| H35B | -1.4514     | -0.5226     | 0.6655     | 0.119      |
| C36  | -1.4519(13) | -0.4023(17) | 0.7697(7)  | 0.234(9)   |
| H36A | -1.4724     | -0.3238     | 0.7735     | 0.281      |
| H36B | -1.5424     | -0.4877     | 0.7683     | 0.281      |
| C37  | -1.3488(17) | -0.372(2)   | 0.8517(8)  | 0.237(8)   |
| H37A | -1.2532     | -0.3001     | 0.8484     | 0.284      |
| H37B | -1.3439     | -0.4592     | 0.8540     | 0.284      |
| C38  | -1.3584(17) | -0.322(2)   | 0.9407(8)  | 0.279(10)  |
| H38A | -1.3740     | -0.2411     | 0.9367     | 0.335      |
| H38B | -1.4480     | -0.3989     | 0.9476     | 0.335      |
| C39  | -1.2392(18) | -0.278(2)   | 1.0251(9)  | 0.273(9)   |
| H39A | -1.1595     | -0.1826     | 1.0276     | 0.328      |
| H39B | -1.2011     | -0.3429     | 1.0206     | 0.328      |
| C40  | -1.270(2)   | -0.270(2)   | 1.1162(9)  | 0.271(9)   |
| H40A | -1.3700     | -0.3465     | 1.1086     | 0.326      |
| H40B | -1.2009     | -0.2854     | 1.1602     | 0.326      |
| H40C | -1.1827     | -0.2542     | 1.1632     | 0.326      |
| H40D | -1.2796     | -0.1860     | 1.1296     | 0.326      |
| C41  | -1.253(6)   | -0.129(3)   | 1.152(2)   | 0.299(17)  |
| H41A | -1.3203     | -0.1122     | 1.1078     | 0.358      |
| H41B | -1.1519     | -0.0521     | 1.1614     | 0.358      |
| C42  | -1.287(3)   | -0.128(3)   | 1.2395(16) | 0.178(12)  |
| H42A | -1.2763     | -0.0365     | 1.2628     | 0.267      |
| H42B | -1.3874     | -0.2037     | 1.2295     | 0.267      |
| H42C | -1.2194     | -0.1437     | 1.2830     | 0.267      |
| C41B | -1.402(3)   | -0.396(3)   | 1.1246(15) | 0.255(14)  |

## SUPPORTING INFORMATION

|      |             |             |            |           |
|------|-------------|-------------|------------|-----------|
| H41C | -1.4879     | -0.3932     | 1.0905     | 0.306     |
| H41D | -1.4072     | -0.4813     | 1.0921     | 0.306     |
| C42B | -1.423(2)   | -0.423(3)   | 1.2131(14) | 0.204(12) |
| H42D | -1.5159     | -0.5103     | 1.2025     | 0.306     |
| H42E | -1.3429     | -0.4323     | 1.2480     | 0.306     |
| H42F | -1.4243     | -0.3434     | 1.2464     | 0.306     |
| C43  | -0.1272(7)  | 0.3611(8)   | 0.1606(5)  | 0.085(2)  |
| C44  | -0.0030(15) | 0.4514(19)  | 0.1257(10) | 0.111(6)  |
| H44A | 0.0853      | 0.4517      | 0.1574     | 0.166     |
| H44B | -0.0300     | 0.4122      | 0.0613     | 0.166     |
| H44C | 0.0154      | 0.5485      | 0.1361     | 0.166     |
| C45  | -0.1508(15) | 0.2071(13)  | 0.1373(8)  | 0.091(5)  |
| H45A | -0.0607     | 0.2089      | 0.1674     | 0.136     |
| H45B | -0.2300     | 0.1427      | 0.1579     | 0.136     |
| H45C | -0.1762     | 0.1742      | 0.0723     | 0.136     |
| C46  | -0.2643(14) | 0.3570(18)  | 0.1147(8)  | 0.087(5)  |
| H46A | -0.2860     | 0.3301      | 0.0496     | 0.131     |
| H46B | -0.3447     | 0.2876      | 0.1322     | 0.131     |
| H46C | -0.2527     | 0.4507      | 0.1320     | 0.131     |
| C44B | -0.2832(18) | 0.234(3)    | 0.1169(14) | 0.138(13) |
| H44D | -0.3516     | 0.2537      | 0.1382     | 0.207     |
| H44E | -0.3094     | 0.2194      | 0.0516     | 0.207     |
| H44F | -0.2881     | 0.1493      | 0.1333     | 0.207     |
| C45B | -0.123(4)   | 0.494(2)    | 0.1334(14) | 0.154(13) |
| H45D | -0.1936     | 0.5108      | 0.1535     | 0.231     |
| H45E | -0.0249     | 0.5763      | 0.1615     | 0.231     |
| H45F | -0.1483     | 0.4783      | 0.0680     | 0.231     |
| C46B | -0.020(2)   | 0.336(3)    | 0.1299(16) | 0.131(12) |
| H46D | -0.0515     | 0.3096      | 0.0642     | 0.196     |
| H46E | 0.0760      | 0.4221      | 0.1525     | 0.196     |
| H46F | -0.0144     | 0.2588      | 0.1528     | 0.196     |
| C51  | -0.6758(13) | -0.0777(17) | 0.1582(11) | 0.112(6)  |
| H51  | -0.6385     | -0.0043     | 0.2151     | 0.135     |
| C11  | -0.5586(9)  | 0.0055(8)   | 0.1034(4)  | 0.185(4)  |
| C12  | -0.667(2)   | -0.207(2)   | 0.1942(15) | 0.347(10) |
| C13  | -0.8391(9)  | -0.0971(12) | 0.1086(5)  | 0.259(6)  |
| C51B | -0.5739(16) | -0.0801(19) | 0.1815(16) | 0.140(10) |
| H51B | -0.5721     | -0.0332     | 0.2400     | 0.168     |
| C11B | -0.608(3)   | 0.012(3)    | 0.112(2)   | 0.51(2)   |
| C12B | -0.7074(14) | -0.2444(10) | 0.1629(6)  | 0.168(5)  |
| C13B | -0.4021(13) | -0.0523(11) | 0.2037(8)  | 0.256(6)  |

Table S4: Hydrogen coordinates and isotropic displacement parameters ( $\text{\AA}^2$ ) for **11d**.

| Atom | x       | y       | z      | $U_{\text{eq}}$ |
|------|---------|---------|--------|-----------------|
| H13  | 0.1213  | 0.5533  | 0.2880 | 0.078           |
| H15  | -0.2861 | 0.2607  | 0.2689 | 0.077           |
| H22  | -0.9009 | -0.1603 | 0.2694 | 0.092           |
| H23  | -1.0986 | -0.2787 | 0.3164 | 0.091           |
| H25  | -0.8624 | -0.0657 | 0.5740 | 0.082           |
| H27  | -0.5947 | 0.1145  | 0.6091 | 0.078           |
| H29  | -0.3287 | 0.2984  | 0.6341 | 0.075           |
| H31A | -1.1758 | -0.3655 | 0.4509 | 0.091           |
| H31B | -1.2113 | -0.2424 | 0.4400 | 0.091           |
| H32A | -1.0612 | -0.2603 | 0.6072 | 0.086           |
| H32B | -1.1013 | -0.1394 | 0.5955 | 0.086           |
| H33A | -1.3521 | -0.3110 | 0.5471 | 0.092           |
| H33B | -1.3139 | -0.4333 | 0.5559 | 0.092           |
| H34A | -1.2619 | -0.2226 | 0.7019 | 0.107           |
| H34B | -1.2104 | -0.3357 | 0.7134 | 0.107           |
| H35A | -1.5113 | -0.4205 | 0.6373 | 0.119           |
| H35B | -1.4514 | -0.5226 | 0.6655 | 0.119           |
| H36A | -1.4724 | -0.3238 | 0.7735 | 0.281           |
| H36B | -1.5424 | -0.4877 | 0.7683 | 0.281           |
| H37A | -1.2532 | -0.3001 | 0.8484 | 0.284           |
| H37B | -1.3439 | -0.4592 | 0.8540 | 0.284           |
| H38A | -1.3740 | -0.2411 | 0.9367 | 0.335           |
| H38B | -1.4480 | -0.3989 | 0.9476 | 0.335           |
| H39A | -1.1595 | -0.1826 | 1.0276 | 0.328           |
| H39B | -1.2011 | -0.3429 | 1.0206 | 0.328           |
| H40A | -1.3700 | -0.3465 | 1.1086 | 0.326           |
| H40B | -1.2009 | -0.2854 | 1.1602 | 0.326           |
| H40C | -1.1827 | -0.2542 | 1.1632 | 0.326           |
| H40D | -1.2796 | -0.1860 | 1.1296 | 0.326           |
| H41A | -1.3203 | -0.1122 | 1.1078 | 0.358           |
| H41B | -1.1519 | -0.0521 | 1.1614 | 0.358           |
| H42A | -1.2763 | -0.0365 | 1.2628 | 0.267           |
| H42B | -1.3874 | -0.2037 | 1.2295 | 0.267           |
| H42C | -1.2194 | -0.1437 | 1.2830 | 0.267           |
| H41C | -1.4879 | -0.3932 | 1.0905 | 0.306           |



## SUPPORTING INFORMATION

|      |         |         |        |       |
|------|---------|---------|--------|-------|
| H41D | -1.4072 | -0.4813 | 1.0921 | 0.306 |
| H42D | -1.5159 | -0.5103 | 1.2025 | 0.306 |
| H42E | -1.3429 | -0.4323 | 1.2480 | 0.306 |
| H42F | -1.4243 | -0.3434 | 1.2464 | 0.306 |
| H44A | 0.0853  | 0.4517  | 0.1574 | 0.166 |
| H44B | -0.0300 | 0.4122  | 0.0613 | 0.166 |
| H44C | 0.0154  | 0.5485  | 0.1361 | 0.166 |
| H45A | -0.0607 | 0.2089  | 0.1674 | 0.136 |
| H45B | -0.2300 | 0.1427  | 0.1579 | 0.136 |
| H45C | -0.1762 | 0.1742  | 0.0723 | 0.136 |
| H46A | -0.2860 | 0.3301  | 0.0496 | 0.131 |
| H46B | -0.3447 | 0.2876  | 0.1322 | 0.131 |
| H46C | -0.2527 | 0.4507  | 0.1320 | 0.131 |
| H44D | -0.3516 | 0.2537  | 0.1382 | 0.207 |
| H44E | -0.3094 | 0.2194  | 0.0516 | 0.207 |
| H44F | -0.2881 | 0.1493  | 0.1333 | 0.207 |
| H45D | -0.1936 | 0.5108  | 0.1535 | 0.231 |
| H45E | -0.0249 | 0.5763  | 0.1615 | 0.231 |
| H45F | -0.1483 | 0.4783  | 0.0680 | 0.231 |
| H46D | -0.0515 | 0.3096  | 0.0642 | 0.196 |
| H46E | 0.0760  | 0.4221  | 0.1525 | 0.196 |
| H46F | -0.0144 | 0.2588  | 0.1528 | 0.196 |
| H51  | -0.6385 | -0.0043 | 0.2151 | 0.135 |
| H51B | -0.5721 | -0.0332 | 0.2400 | 0.168 |

**Table S5:** Anisotropic displacement parameters ( $\text{\AA}^2$ ) for **11d**. The anisotropic displacement factor exponent takes the form:  $-2\pi^2(h^2 a^2 U_{11} + \dots + 2 h k a' b' U_{12})$

| Atom | $U_{11}$  | $U_{22}$  | $U_{33}$  | $U_{23}$   | $U_{13}$  | $U_{12}$   |
|------|-----------|-----------|-----------|------------|-----------|------------|
| C11  | 0.064(4)  | 0.049(3)  | 0.060(3)  | 0.011(3)   | 0.024(3)  | 0.030(3)   |
| C12  | 0.062(4)  | 0.059(4)  | 0.058(4)  | 0.015(3)   | 0.021(3)  | 0.033(3)   |
| C13  | 0.069(4)  | 0.066(4)  | 0.068(4)  | 0.019(3)   | 0.032(3)  | 0.036(3)   |
| C14  | 0.070(4)  | 0.077(5)  | 0.057(3)  | 0.010(3)   | 0.024(3)  | 0.038(4)   |
| C15  | 0.059(4)  | 0.067(4)  | 0.060(4)  | 0.001(3)   | 0.018(3)  | 0.031(3)   |
| C16  | 0.070(4)  | 0.054(4)  | 0.066(4)  | 0.016(3)   | 0.031(3)  | 0.039(3)   |
| C17  | 0.067(4)  | 0.062(4)  | 0.064(4)  | 0.012(3)   | 0.028(3)  | 0.039(3)   |
| N18  | 0.067(3)  | 0.060(3)  | 0.061(3)  | 0.014(3)   | 0.024(3)  | 0.032(3)   |
| C19  | 0.068(4)  | 0.055(4)  | 0.064(4)  | 0.016(3)   | 0.025(3)  | 0.033(3)   |
| N20  | 0.063(3)  | 0.066(4)  | 0.072(3)  | 0.012(3)   | 0.028(3)  | 0.033(3)   |
| C21  | 0.065(4)  | 0.055(4)  | 0.075(4)  | 0.013(3)   | 0.026(3)  | 0.034(3)   |
| C22  | 0.074(4)  | 0.063(4)  | 0.082(5)  | 0.009(3)   | 0.023(3)  | 0.028(4)   |
| C23  | 0.069(4)  | 0.061(4)  | 0.088(4)  | 0.014(4)   | 0.029(4)  | 0.025(4)   |
| C24  | 0.063(4)  | 0.053(4)  | 0.095(4)  | 0.023(3)   | 0.032(3)  | 0.031(3)   |
| C25  | 0.069(4)  | 0.065(4)  | 0.084(4)  | 0.021(3)   | 0.032(3)  | 0.040(3)   |
| C26  | 0.068(4)  | 0.051(4)  | 0.078(4)  | 0.017(3)   | 0.032(3)  | 0.034(3)   |
| C27  | 0.068(4)  | 0.070(4)  | 0.071(4)  | 0.021(3)   | 0.032(3)  | 0.040(3)   |
| C28  | 0.066(4)  | 0.048(4)  | 0.068(4)  | 0.016(3)   | 0.029(3)  | 0.036(3)   |
| C29  | 0.068(4)  | 0.059(4)  | 0.067(4)  | 0.015(3)   | 0.027(3)  | 0.035(3)   |
| C30  | 0.065(4)  | 0.053(4)  | 0.063(4)  | 0.016(3)   | 0.026(3)  | 0.031(3)   |
| C31  | 0.066(4)  | 0.072(4)  | 0.103(5)  | 0.025(4)   | 0.038(4)  | 0.039(4)   |
| C32  | 0.064(4)  | 0.063(4)  | 0.099(5)  | 0.022(4)   | 0.031(4)  | 0.038(4)   |
| C33  | 0.074(5)  | 0.068(5)  | 0.108(5)  | 0.032(4)   | 0.048(4)  | 0.040(4)   |
| C34  | 0.079(5)  | 0.093(5)  | 0.111(5)  | 0.034(5)   | 0.047(4)  | 0.046(4)   |
| C35  | 0.084(5)  | 0.112(6)  | 0.112(6)  | 0.038(5)   | 0.057(5)  | 0.045(5)   |
| C36  | 0.134(10) | 0.301(17) | 0.124(8)  | 0.011(10)  | 0.079(7)  | -0.009(11) |
| C37  | 0.227(17) | 0.38(3)   | 0.157(9)  | 0.110(15)  | 0.113(10) | 0.165(18)  |
| C38  | 0.242(17) | 0.47(3)   | 0.153(9)  | 0.113(16)  | 0.125(10) | 0.17(2)    |
| C39  | 0.290(18) | 0.41(2)   | 0.138(10) | 0.098(14)  | 0.088(10) | 0.180(17)  |
| C40  | 0.232(14) | 0.35(2)   | 0.170(10) | 0.050(13)  | 0.091(10) | 0.089(13)  |
| C41B | 0.19(2)   | 0.36(3)   | 0.143(16) | 0.046(18)  | 0.070(15) | 0.079(17)  |
| C42B | 0.128(17) | 0.29(3)   | 0.150(17) | 0.039(17)  | 0.071(14) | 0.060(17)  |
| C43  | 0.081(5)  | 0.112(6)  | 0.060(4)  | 0.013(4)   | 0.025(3)  | 0.046(4)   |
| C44  | 0.106(10) | 0.169(15) | 0.060(8)  | 0.029(11)  | 0.044(8)  | 0.065(11)  |
| C45  | 0.089(12) | 0.134(9)  | 0.056(7)  | -0.007(7)  | 0.020(7)  | 0.069(9)   |
| C46  | 0.103(9)  | 0.116(13) | 0.059(7)  | 0.024(9)   | 0.025(7)  | 0.067(10)  |
| C44B | 0.099(12) | 0.19(2)   | 0.055(12) | -0.002(15) | 0.005(10) | 0.039(13)  |
| C45B | 0.28(4)   | 0.191(19) | 0.057(12) | 0.039(14)  | 0.057(18) | 0.16(2)    |
| C46B | 0.110(17) | 0.22(4)   | 0.069(13) | 0.00(2)    | 0.017(13) | 0.10(2)    |
| C51  | 0.092(14) | 0.102(14) | 0.102(12) | 0.024(10)  | 0.031(11) | 0.017(11)  |
| Cl1  | 0.185(6)  | 0.150(6)  | 0.103(4)  | -0.003(4)  | 0.053(4)  | -0.002(4)  |
| Cl2  | 0.251(15) | 0.34(2)   | 0.47(2)   | 0.212(17)  | 0.166(16) | 0.123(15)  |
| Cl3  | 0.184(7)  | 0.430(14) | 0.133(5)  | 0.082(7)   | 0.067(5)  | 0.122(8)   |
| C51B | 0.14(2)   | 0.19(2)   | 0.18(3)   | 0.13(2)    | 0.13(2)   | 0.10(2)    |
| Cl1B | 0.46(4)   | 0.38(3)   | 0.49(4)   | 0.19(3)    | 0.00(3)   | 0.12(2)    |
| Cl2B | 0.209(10) | 0.121(6)  | 0.124(5)  | -0.015(4)  | 0.100(6)  | 0.032(5)   |
| Cl3B | 0.281(12) | 0.211(10) | 0.280(13) | 0.041(8)   | 0.142(10) | 0.109(9)   |

## SUPPORTING INFORMATION

Table S6: Bond lengths (Å) and angles (deg) for 11d.

|            |           |               |           |
|------------|-----------|---------------|-----------|
| C11-C12    | 1.402(8)  | C43-C44B      | 1.540(13) |
| C11-C16    | 1.419(8)  | C43-C45B      | 1.553(14) |
| C11-C11#1  | 1.440(12) | C43-C45       | 1.582(11) |
| C12-C13    | 1.407(8)  | C44-H44A      | 0.9800    |
| C12-C30#1  | 1.481(8)  | C44-H44B      | 0.9800    |
| C13-C14    | 1.375(8)  | C44-H44C      | 0.9800    |
| C13-H13    | 0.9500    | C45-H45A      | 0.9800    |
| C14-C15    | 1.387(9)  | C45-H45B      | 0.9800    |
| C14-C43    | 1.524(9)  | C45-H45C      | 0.9800    |
| C15-C16    | 1.400(8)  | C46-H46A      | 0.9800    |
| C15-H15    | 0.9500    | C46-H46B      | 0.9800    |
| C16-C17    | 1.461(8)  | C46-H46C      | 0.9800    |
| C17-N18    | 1.327(7)  | C44B-H44D     | 0.9800    |
| C17-C30    | 1.454(9)  | C44B-H44E     | 0.9800    |
| N18-C19    | 1.361(8)  | C44B-H44F     | 0.9800    |
| C19-N20    | 1.351(7)  | C45B-H45D     | 0.9800    |
| C19-C28    | 1.407(9)  | C45B-H45E     | 0.9800    |
| N20-C21    | 1.338(8)  | C45B-H45F     | 0.9800    |
| C21-C22    | 1.426(8)  | C46B-H46D     | 0.9800    |
| C21-C26    | 1.435(9)  | C46B-H46E     | 0.9800    |
| C22-C23    | 1.355(9)  | C46B-H46F     | 0.9800    |
| C22-H22    | 0.9500    | C51-Ci2       | 1.630(14) |
| C23-C24    | 1.422(9)  | C51-C11       | 1.672(12) |
| C23-H23    | 0.9500    | C51-Ci3       | 1.678(12) |
| C24-C25    | 1.365(9)  | C51-H51       | 1.0000    |
| C24-C31    | 1.499(9)  | C51B-Ci2B     | 1.649(14) |
| C25-C26    | 1.417(9)  | C51B-Ci1B     | 1.672(15) |
| C25-H25    | 0.9500    | C51B-Ci3B     | 1.696(13) |
| C26-C27    | 1.401(9)  | C51B-H51B     | 1.0000    |
| C27-C28    | 1.418(8)  | C12-C11-C16   | 118.1(6)  |
| C27-H27    | 0.9500    | C12-C11-C11#1 | 120.9(7)  |
| C28-C29    | 1.420(8)  | C16-C11-C11#1 | 121.0(7)  |
| C29-C30    | 1.359(8)  | C11-C12-C13   | 119.3(6)  |
| C29-H29    | 0.9500    | C11-C12-C30#1 | 119.9(6)  |
| C31-C32    | 1.523(8)  | C13-C12-C30#1 | 120.8(6)  |
| C31-H31A   | 0.9900    | C14-C13-C12   | 123.1(6)  |
| C31-H31B   | 0.9900    | C14-C13-H13   | 118.4     |
| C32-C33    | 1.516(7)  | C12-C13-H13   | 118.4     |
| C32-H32A   | 0.9900    | C13-C14-C15   | 117.5(6)  |
| C32-H32B   | 0.9900    | C13-C14-C43   | 122.0(6)  |
| C33-C34    | 1.497(8)  | C15-C14-C43   | 120.5(6)  |
| C33-H33A   | 0.9900    | C14-C15-C16   | 121.8(6)  |
| C33-H33B   | 0.9900    | C14-C15-H15   | 119.1     |
| C34-C35    | 1.530(8)  | C16-C15-H15   | 119.1     |
| C34-H34A   | 0.9900    | C15-C16-C11   | 120.2(6)  |
| C34-H34B   | 0.9900    | C15-C16-C17   | 120.1(6)  |
| C35-C36    | 1.450(10) | C11-C16-C17   | 119.7(6)  |
| C35-H35A   | 0.9900    | N18-C17-C30   | 122.8(6)  |
| C35-H35B   | 0.9900    | N18-C17-C16   | 117.7(6)  |
| C36-C37    | 1.398(11) | C30-C17-C16   | 119.5(6)  |
| C36-C42B#2 | 1.86(3)   | C17-N18-C19   | 119.2(6)  |
| C36-H36A   | 0.9900    | N20-C19-N18   | 115.0(6)  |
| C36-H36B   | 0.9900    | N20-C19-C28   | 123.3(6)  |
| C37-C38    | 1.500(12) | N18-C19-C28   | 121.6(6)  |
| C37-H37A   | 0.9900    | C21-N20-C19   | 117.9(6)  |
| C37-H37B   | 0.9900    | N20-C21-C22   | 118.5(6)  |
| C38-C39    | 1.480(12) | N20-C21-C26   | 124.3(6)  |
| C38-H38A   | 0.9900    | C22-C21-C26   | 117.2(6)  |
| C38-H38B   | 0.9900    | C23-C22-C21   | 120.8(7)  |
| C39-C40    | 1.550(11) | C23-C22-H22   | 119.6     |
| C39-H39A   | 0.9900    | C21-C22-H22   | 119.6     |
| C39-H39B   | 0.9900    | C22-C23-C24   | 122.3(7)  |
| C40-C41B   | 1.510(14) | C22-C23-H23   | 118.8     |
| C40-C41    | 1.510(15) | C24-C23-H23   | 118.8     |
| C40-H40A   | 0.9900    | C25-C24-C23   | 118.2(7)  |
| C40-H40B   | 0.9900    | C25-C24-C31   | 124.3(7)  |
| C40-H40C   | 0.9900    | C23-C24-C31   | 117.5(6)  |
| C40-H40D   | 0.9900    | C24-C25-C26   | 121.6(7)  |
| C41-C42    | 1.513(15) | C24-C25-H25   | 119.2     |
| C41-H41A   | 0.9900    | C26-C25-H25   | 119.2     |
| C41-H41B   | 0.9900    | C27-C26-C25   | 123.6(6)  |
| C42-H42A   | 0.9800    | C27-C26-C21   | 116.5(6)  |
| C42-H42B   | 0.9800    | C25-C26-C21   | 119.9(6)  |
| C42-H42C   | 0.9800    | C26-C27-C28   | 119.9(6)  |
| C41B-C42B  | 1.505(14) | C26-C27-H27   | 120.1     |
| C41B-H41C  | 0.9900    | C28-C27-H27   | 120.1     |
| C41B-H41D  | 0.9900    | C19-C28-C27   | 118.0(6)  |
| C42B-H42D  | 0.9800    | C19-C28-C29   | 118.7(6)  |
| C42B-H42E  | 0.9800    | C27-C28-C29   | 123.3(6)  |
| C42B-H42F  | 0.9800    | C30-C29-C28   | 120.2(6)  |
| C43-C46    | 1.487(11) | C30-C29-H29   | 119.9     |
| C43-C46B   | 1.487(13) | C28-C29-H29   | 119.9     |
| C43-C44    | 1.524(11) | C29-C30-C17   | 117.5(6)  |

## SUPPORTING INFORMATION

|                 |           |                   |           |
|-----------------|-----------|-------------------|-----------|
| C29-C30-C12#1   | 123.5(6)  | C42B-C41B-H41D    | 106.5     |
| C17-C30-C12#1   | 119.0(6)  | C40-C41B-H41D     | 106.5     |
| C24-C31-C32     | 118.9(6)  | H41C-C41B-H41D    | 106.5     |
| C24-C31-H31A    | 107.6     | C41B-C42B-H42D    | 109.5     |
| C32-C31-H31A    | 107.6     | C36#2-C42B-H42D   | 23.7      |
| C24-C31-H31B    | 107.6     | C41B-C42B-H42E    | 109.5     |
| C32-C31-H31B    | 107.6     | C36#2-C42B-H42E   | 86.5      |
| H31A-C31-H31B   | 107.0     | H42D-C42B-H42E    | 109.5     |
| C33-C32-C31     | 111.5(6)  | C41B-C42B-H42F    | 109.5     |
| C33-C32-H32A    | 109.3     | C36#2-C42B-H42F   | 113.7     |
| C31-C32-H32A    | 109.3     | H42D-C42B-H42F    | 109.5     |
| C33-C32-H32B    | 109.3     | H42E-C42B-H42F    | 109.5     |
| C31-C32-H32B    | 109.3     | C36#2-C42B-H36B#2 | 19.2(8)   |
| H32A-C32-H32B   | 108.0     | C46-C43-C14       | 111.7(7)  |
| C34-C33-C32     | 115.1(6)  | C46B-C43-C14      | 113.6(11) |
| C34-C33-H33A    | 108.5     | C46-C43-C44       | 111.8(9)  |
| C32-C33-H33A    | 108.5     | C14-C43-C44       | 113.3(8)  |
| C34-C33-H33B    | 108.5     | C46B-C43-C44B     | 111.1(13) |
| C32-C33-H33B    | 108.5     | C14-C43-C44B      | 111.8(9)  |
| H33A-C33-H33B   | 107.5     | C46B-C43-C45B     | 109.3(14) |
| C33-C34-C35     | 111.7(6)  | C14-C43-C45B      | 102.4(9)  |
| C33-C34-H34A    | 109.3     | C44B-C43-C45B     | 108.2(14) |
| C35-C34-H34A    | 109.3     | C46-C43-C45       | 109.0(8)  |
| C33-C34-H34B    | 109.3     | C14-C43-C45       | 105.5(7)  |
| C35-C34-H34B    | 109.3     | C44-C43-C45       | 105.0(9)  |
| H34A-C34-H34B   | 107.9     | C43-C44-H44A      | 109.5     |
| C36-C35-C34     | 113.7(7)  | C43-C44-H44B      | 109.5     |
| C36-C35-H35A    | 108.8     | H44A-C44-H44B     | 109.5     |
| C34-C35-H35A    | 108.8     | C43-C44-H44C      | 109.5     |
| C36-C35-H35B    | 108.8     | H44A-C44-H44C     | 109.5     |
| C34-C35-H35B    | 108.8     | H44B-C44-H44C     | 109.5     |
| H35A-C35-H35B   | 107.7     | C43-C45-H45A      | 109.5     |
| C37-C36-C35     | 125.7(12) | C43-C45-H45B      | 109.5     |
| C37-C36-C42B#2  | 90.3(14)  | H45A-C45-H45B     | 109.5     |
| C35-C36-C42B#2  | 108.1(11) | C43-C45-H45C      | 109.5     |
| C37-C36-H36A    | 105.9     | H45A-C45-H45C     | 109.5     |
| C35-C36-H36A    | 105.9     | H45B-C45-H45C     | 109.5     |
| C42B#2-C36-H36A | 122.0     | C43-C46-H46A      | 109.5     |
| C37-C36-H36B    | 105.9     | C43-C46-H46B      | 109.5     |
| C35-C36-H36B    | 105.9     | H46A-C46-H46B     | 109.5     |
| C42B#2-C36-H36B | 19.0      | C43-C46-H46C      | 109.5     |
| H36A-C36-H36B   | 106.2     | H46A-C46-H46C     | 109.5     |
| C36-C37-C38     | 123.5(13) | H46B-C46-H46C     | 109.5     |
| C36-C37-H37A    | 106.4     | C43-C44B-H44D     | 109.5     |
| C38-C37-H37A    | 106.4     | C43-C44B-H44E     | 109.5     |
| C36-C37-H37B    | 106.4     | H44D-C44B-H44E    | 109.5     |
| C38-C37-H37B    | 106.4     | C43-C44B-H44F     | 109.5     |
| H37A-C37-H37B   | 106.5     | H44D-C44B-H44F    | 109.5     |
| C39-C38-C37     | 121.6(13) | H44E-C44B-H44F    | 109.5     |
| C39-C38-H38A    | 106.9     | C43-C45B-H45D     | 109.5     |
| C37-C38-H38A    | 106.9     | C43-C45B-H45E     | 109.5     |
| C39-C38-H38B    | 106.9     | H45D-C45B-H45E    | 109.5     |
| C37-C38-H38B    | 106.9     | C43-C45B-H45F     | 109.5     |
| H38A-C38-H38B   | 106.7     | H45D-C45B-H45F    | 109.5     |
| C38-C39-C40     | 119.9(12) | H45E-C45B-H45F    | 109.5     |
| C38-C39-H39A    | 107.4     | C43-C46B-H46D     | 109.5     |
| C40-C39-H39A    | 107.4     | C43-C46B-H46E     | 109.5     |
| C38-C39-H39B    | 107.4     | H46D-C46B-H46E    | 109.5     |
| C40-C39-H39B    | 107.4     | C43-C46B-H46F     | 109.5     |
| H39A-C39-H39B   | 106.9     | H46D-C46B-H46F    | 109.5     |
| C41B-C40-C39    | 117.6(14) | H46E-C46B-H46F    | 109.5     |
| C41-C40-C39     | 111.3(15) | CI2-C51-CI1       | 116.2(11) |
| C41-C40-H40A    | 109.4     | CI2-C51-CI3       | 119.5(11) |
| C39-C40-H40A    | 109.4     | CI1-C51-CI3       | 110.3(9)  |
| C41-C40-H40B    | 109.4     | CI2-C51-H51       | 102.6     |
| C39-C40-H40B    | 109.4     | CI1-C51-H51       | 102.6     |
| H40A-C40-H40B   | 108.0     | CI3-C51-H51       | 102.6     |
| C41B-C40-H40C   | 107.9     | CI2B-C51B-CI1B    | 114.9(14) |
| C39-C40-H40C    | 107.9     | CI2B-C51B-CI3B    | 117.2(12) |
| C41B-C40-H40D   | 107.9     | CI1B-C51B-CI3B    | 113.3(14) |
| C39-C40-H40D    | 107.9     | CI2B-C51B-H51B    | 102.9     |
| H40C-C40-H40D   | 107.2     | CI1B-C51B-H51B    | 102.9     |
| C40-C41-C42     | 109.2(19) | CI3B-C51B-H51B    | 102.9     |
| C40-C41-H41A    | 109.8     |                   |           |
| C42-C41-H41A    | 109.8     |                   |           |
| C40-C41-H41B    | 109.8     |                   |           |
| C42-C41-H41B    | 109.8     |                   |           |
| H41A-C41-H41B   | 108.3     |                   |           |
| C41-C42-H42A    | 109.5     |                   |           |
| C41-C42-H42B    | 109.5     |                   |           |
| H42A-C42-H42B   | 109.5     |                   |           |
| C41-C42-H42C    | 109.5     |                   |           |
| H42A-C42-H42C   | 109.5     |                   |           |
| H42B-C42-H42C   | 109.5     |                   |           |
| C42B-C41B-C40   | 123.5(18) |                   |           |
| C42B-C41B-H41C  | 106.5     |                   |           |
| C40-C41B-H41C   | 106.5     |                   |           |

## SUPPORTING INFORMATION

Symmetry transformations used to generate equivalent atoms:

- #1 -x,-y+1,-z+1
- #2 -x-3,-y-1,-z+2

suggestion for a short experimental part:

**11d:** orange crystal (plank), dimensions 0.200 x 0.042 x 0.029 mm<sup>3</sup>, crystal system triclinic, space group  $P\bar{1}$ , Z=1, a=10.9165(9) Å, b=11.0282(10) Å, c=15.7887(18) Å, alpha=96.115(9) deg, beta=103.041(9) deg, gamma=117.863(6) deg, V=1586.7(3) Å<sup>3</sup>, rho=1.250 g/cm<sup>3</sup>, T=200(2) K, Theta<sub>max</sub>= 54.221 deg, radiation CuKα, lambda=1.54178 Å, 0.5 deg omega-scans with CCD area detector, covering the asymmetric unit in reciprocal space with a mean redundancy of 2.67 and a completeness of 99.2% to a resolution of 0.95 Å, 10339 reflections measured, 3844 unique (R(int)=0.0525), 1895 observed (I > 2σ(I)), intensities were corrected for Lorentz and polarization effects, an empirical scaling and absorption correction was applied using X-Area LANA 1.70.0.0 (STOE, 2017) based on the Laue symmetry of the reciprocal space, mu=2.80mm<sup>-1</sup>, T<sub>min</sub>=0.56, T<sub>max</sub>=1.52, structure solved with SHELXT-2014 (Sheldrick 2014)<sup>[2]</sup> and refined against F<sup>2</sup> with a Full-matrix least-squares algorithm using the SHELXL-2018/3 (Sheldrick, 2018) software<sup>[3]</sup>, 435 parameters refined, hydrogen atoms were treated using appropriate riding models, goodness of fit 1.25 for observed reflections, final residual values R1(F)=0.123, wR(F<sup>2</sup>)=0.327 for observed reflections, residual electron density -0.37 to 0.52 eÅ<sup>-3</sup>. CCDC ..... contains the supplementary crystallographic data for this paper. The data can be obtained free of charge from The Cambridge Crystallographic Data Centre via [www.ccdc.cam.ac.uk/structures](http://www.ccdc.cam.ac.uk/structures).

Lit. 2: (SHELXT - Integrated space-group and crystal structure determination)  
Sheldrick G. M., Acta Cryst. A71 (2015) 3-8.

Lit. 3: (program SHELXL-2018/3 (Sheldrick, 2018) for structure refinement)  
Sheldrick G. M., Acta Cryst. (2015). C71, 3-8

Lit. APEX, APEX2, SMART, SAINT, SAINT-Plus:  
Bruker (2007). "Program name(s)". Bruker AXS Inc., Madison, Wisconsin, USA.

## 6.2. Compound 5a

## SUPPORTING INFORMATION

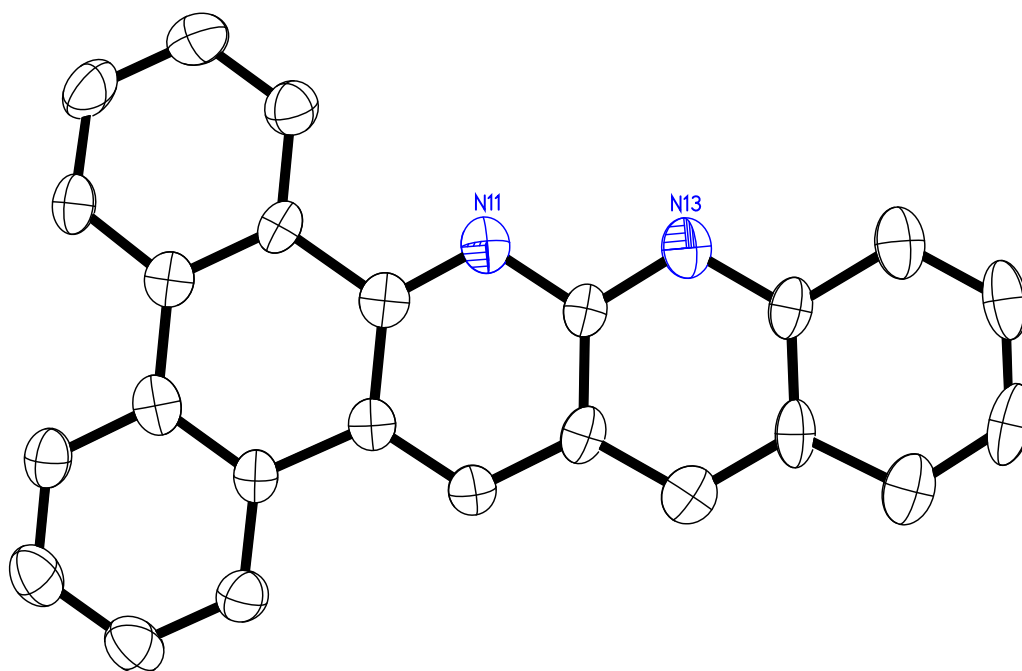

Figure S9: Crystal structure of 5a.

Table S7: Crystal data and structure refinement for 5a.

|                                   |                                                                |                                                  |
|-----------------------------------|----------------------------------------------------------------|--------------------------------------------------|
| Identification code               | stu5                                                           |                                                  |
| Empirical formula                 | C <sub>25</sub> H <sub>15</sub> Cl <sub>3</sub> N <sub>2</sub> |                                                  |
| Formula weight                    | 449.74                                                         |                                                  |
| Temperature                       | 200(2) K                                                       |                                                  |
| Wavelength                        | 0.71073 Å                                                      |                                                  |
| Crystal system                    | monoclinic                                                     |                                                  |
| Space group                       | P2 <sub>1</sub> /c                                             |                                                  |
| Z                                 | 4                                                              |                                                  |
| Unit cell dimensions              | a = 10.4065(5) Å<br>b = 10.1857(5) Å<br>c = 19.6197(11) Å      | α = 90 deg.<br>β = 98.493(3) deg.<br>γ = 90 deg. |
| Volume                            | 2056.83(18) Å <sup>3</sup>                                     |                                                  |
| Density (calculated)              | 1.45 g/cm <sup>3</sup>                                         |                                                  |
| Absorption coefficient            | 0.46 mm <sup>-1</sup>                                          |                                                  |
| Crystal shape                     | plate                                                          |                                                  |
| Crystal size                      | 0.230 x 0.217 x 0.020 mm <sup>3</sup>                          |                                                  |
| Crystal colour                    | yellow                                                         |                                                  |
| Theta range for data collection   | 2.0 to 21.7 deg.                                               |                                                  |
| Index ranges                      | -10 ≤ h ≤ 10, -10 ≤ k ≤ 10, -20 ≤ l ≤ 20                       |                                                  |
| Reflections collected             | 18967                                                          |                                                  |
| Independent reflections           | 2437 (R(int) = 0.0778)                                         |                                                  |
| Observed reflections              | 1560 (I > 2σ(I))                                               |                                                  |
| Absorption correction             | Semi-empirical from equivalents                                |                                                  |
| Max. and min. transmission        | 0.96 and 0.86                                                  |                                                  |
| Refinement method                 | Full-matrix least-squares on F <sup>2</sup>                    |                                                  |
| Data/restraints/parameters        | 2437 / 60 / 308                                                |                                                  |
| Goodness-of-fit on F <sup>2</sup> | 1.04                                                           |                                                  |
| Final R indices (I > 2σ(I))       | R1 = 0.060, wR2 = 0.133                                        |                                                  |
| Largest diff. peak and hole       | 0.28 and -0.30 eÅ <sup>-3</sup>                                |                                                  |

Table S8: Atomic coordinates and equivalent isotropic displacement parameters (Å<sup>2</sup>) for 5a. U<sub>eq</sub> is defined as one third of the trace of the orthogonalized U<sub>ij</sub> tensor.

| Atom | x | y | z | U <sub>eq</sub> |
|------|---|---|---|-----------------|
|------|---|---|---|-----------------|

## SUPPORTING INFORMATION

|      |             |            |           |            |
|------|-------------|------------|-----------|------------|
| N11  | 0.3421(3)   | 0.6567(4)  | 0.4443(2) | 0.0333(10) |
| C12  | 0.4148(4)   | 0.5737(4)  | 0.4113(2) | 0.0270(11) |
| N13  | 0.3459(4)   | 0.4918(4)  | 0.3657(2) | 0.0372(10) |
| C14  | 0.4124(5)   | 0.4047(4)  | 0.3319(2) | 0.0329(12) |
| C15  | 0.3411(5)   | 0.3174(4)  | 0.2839(2) | 0.0444(13) |
| H15  | 0.2490      | 0.3221     | 0.2754    | 0.053      |
| C16  | 0.4038(6)   | 0.2285(5)  | 0.2504(2) | 0.0485(14) |
| H16  | 0.3550      | 0.1703     | 0.2187    | 0.058      |
| C17  | 0.5398(6)   | 0.2196(5)  | 0.2613(2) | 0.0496(14) |
| H17  | 0.5817      | 0.1552     | 0.2374    | 0.059      |
| C18  | 0.6115(5)   | 0.3016(5)  | 0.3054(2) | 0.0447(13) |
| H18  | 0.7036      | 0.2953     | 0.3119    | 0.054      |
| C19  | 0.5504(5)   | 0.3978(4)  | 0.3425(2) | 0.0339(12) |
| C20  | 0.6187(5)   | 0.4829(4)  | 0.3897(2) | 0.0378(12) |
| H20  | 0.7109      | 0.4791     | 0.3984    | 0.045      |
| C21  | 0.5525(4)   | 0.5733(4)  | 0.4241(2) | 0.0299(11) |
| C22  | 0.6144(4)   | 0.6653(4)  | 0.4725(2) | 0.0302(11) |
| H22  | 0.7066      | 0.6681     | 0.4821    | 0.036      |
| C23  | 0.5416(4)   | 0.7502(4)  | 0.5054(2) | 0.0263(11) |
| C24  | 0.6000(4)   | 0.8481(4)  | 0.5561(2) | 0.0292(11) |
| C25  | 0.7349(4)   | 0.8569(5)  | 0.5743(2) | 0.0407(13) |
| H25  | 0.7892      | 0.7970     | 0.5548    | 0.049      |
| C26  | 0.7903(5)   | 0.9508(5)  | 0.6200(2) | 0.0485(14) |
| H26  | 0.8821      | 0.9557     | 0.6315    | 0.058      |
| C27  | 0.7122(5)   | 1.0379(5)  | 0.6492(2) | 0.0466(14) |
| H27  | 0.7500      | 1.1029     | 0.6806    | 0.056      |
| C28  | 0.5799(5)   | 1.0297(4)  | 0.6324(2) | 0.0393(13) |
| H28  | 0.5270      | 1.0899     | 0.6527    | 0.047      |
| C29  | 0.5203(4)   | 0.9351(4)  | 0.5861(2) | 0.0325(12) |
| C30  | 0.3795(4)   | 0.9236(4)  | 0.5713(2) | 0.0323(11) |
| C31  | 0.2945(5)   | 1.0042(5)  | 0.6032(2) | 0.0401(13) |
| H31  | 0.3297      | 1.0717     | 0.6339    | 0.048      |
| C32  | 0.1641(5)   | 0.9866(5)  | 0.5908(3) | 0.0511(14) |
| H32  | 0.1099      | 1.0423     | 0.6130    | 0.061      |
| C33  | 0.1078(5)   | 0.8904(5)  | 0.5470(3) | 0.0522(14) |
| H33  | 0.0163      | 0.8782     | 0.5398    | 0.063      |
| C34  | 0.1867(5)   | 0.8125(5)  | 0.5140(2) | 0.0420(13) |
| H34  | 0.1487      | 0.7469     | 0.4829    | 0.050      |
| C35  | 0.3209(4)   | 0.8273(4)  | 0.5248(2) | 0.0302(11) |
| C36  | 0.4029(4)   | 0.7404(4)  | 0.4892(2) | 0.0299(11) |
| C41  | 0.042(2)    | 0.5291(14) | 0.3683(6) | 0.082(7)   |
| H41  | 0.1385      | 0.5364     | 0.3699    | 0.098      |
| Cl1  | 0.0112(5)   | 0.4888(5)  | 0.4504(3) | 0.120(2)   |
| Cl2  | -0.0273(13) | 0.6786(12) | 0.3393(8) | 0.209(8)   |
| Cl3  | -0.0144(9)  | 0.4094(10) | 0.3079(4) | 0.154(4)   |
| C41B | 0.0551(15)  | 0.5699(11) | 0.3426(6) | 0.066(4)   |
| H41B | 0.1395      | 0.5830     | 0.3735    | 0.080      |
| Cl1B | 0.0806(4)   | 0.5990(5)  | 0.2581(2) | 0.139(2)   |
| Cl2B | 0.0010(6)   | 0.4104(5)  | 0.3548(4) | 0.141(3)   |
| Cl3B | -0.0567(6)  | 0.6819(6)  | 0.3660(4) | 0.0950(18) |

**Table S9:** Hydrogen coordinates and isotropic displacement parameters ( $\text{\AA}^2$ ) for **5a**.

| Atom | x      | y      | z      | $U_{\text{eq}}$ |
|------|--------|--------|--------|-----------------|
| H15  | 0.2490 | 0.3221 | 0.2754 | 0.053           |
| H16  | 0.3550 | 0.1703 | 0.2187 | 0.058           |
| H17  | 0.5817 | 0.1552 | 0.2374 | 0.059           |
| H18  | 0.7036 | 0.2953 | 0.3119 | 0.054           |
| H20  | 0.7109 | 0.4791 | 0.3984 | 0.045           |
| H22  | 0.7066 | 0.6681 | 0.4821 | 0.036           |
| H25  | 0.7892 | 0.7970 | 0.5548 | 0.049           |
| H26  | 0.8821 | 0.9557 | 0.6315 | 0.058           |
| H27  | 0.7500 | 1.1029 | 0.6806 | 0.056           |
| H28  | 0.5270 | 1.0899 | 0.6527 | 0.047           |
| H31  | 0.3297 | 1.0717 | 0.6339 | 0.048           |
| H32  | 0.1099 | 1.0423 | 0.6130 | 0.061           |
| H33  | 0.0163 | 0.8782 | 0.5398 | 0.063           |
| H34  | 0.1487 | 0.7469 | 0.4829 | 0.050           |
| H41  | 0.1385 | 0.5364 | 0.3699 | 0.098           |
| H41B | 0.1395 | 0.5830 | 0.3735 | 0.080           |

**Table S10:** Anisotropic displacement parameters ( $\text{\AA}^2$ ) for **5a**. The anisotropic displacement factor exponent takes the form:  $-2\pi^2(h^2 a^2 U_{11} + \dots + 2hk a^* b^* U_{12})$

## SUPPORTING INFORMATION

| Atom | U <sub>11</sub> | U <sub>22</sub> | U <sub>33</sub> | U <sub>23</sub> | U <sub>13</sub> | U <sub>12</sub> |
|------|-----------------|-----------------|-----------------|-----------------|-----------------|-----------------|
| N11  | 0.044(2)        | 0.030(2)        | 0.025(2)        | 0.004(2)        | 0.0029(19)      | 0.001(2)        |
| C12  | 0.038(3)        | 0.023(3)        | 0.020(2)        | 0.005(2)        | 0.005(2)        | 0.004(2)        |
| N13  | 0.050(2)        | 0.034(2)        | 0.028(2)        | 0.002(2)        | 0.007(2)        | -0.002(2)       |
| C14  | 0.052(3)        | 0.028(3)        | 0.021(3)        | 0.003(2)        | 0.012(2)        | 0.003(2)        |
| C15  | 0.070(4)        | 0.034(3)        | 0.030(3)        | 0.002(3)        | 0.007(3)        | -0.001(3)       |
| C16  | 0.085(4)        | 0.036(3)        | 0.023(3)        | -0.003(2)       | 0.004(3)        | -0.004(3)       |
| C17  | 0.090(5)        | 0.033(3)        | 0.030(3)        | 0.000(3)        | 0.024(3)        | 0.011(3)        |
| C18  | 0.068(4)        | 0.036(3)        | 0.032(3)        | 0.007(3)        | 0.017(3)        | 0.006(3)        |
| C19  | 0.064(4)        | 0.023(3)        | 0.016(3)        | 0.003(2)        | 0.010(2)        | 0.000(2)        |
| C20  | 0.046(3)        | 0.038(3)        | 0.031(3)        | 0.009(3)        | 0.009(2)        | 0.003(3)        |
| C21  | 0.045(3)        | 0.028(3)        | 0.019(2)        | 0.006(2)        | 0.012(2)        | 0.004(2)        |
| C22  | 0.035(3)        | 0.030(3)        | 0.026(3)        | 0.003(2)        | 0.007(2)        | -0.001(2)       |
| C23  | 0.038(3)        | 0.023(2)        | 0.019(2)        | 0.010(2)        | 0.006(2)        | -0.001(2)       |
| C24  | 0.040(3)        | 0.025(3)        | 0.024(3)        | 0.003(2)        | 0.009(2)        | -0.002(2)       |
| C25  | 0.038(3)        | 0.048(3)        | 0.037(3)        | -0.007(3)       | 0.008(2)        | 0.000(3)        |
| C26  | 0.047(3)        | 0.057(3)        | 0.040(3)        | -0.007(3)       | 0.004(3)        | -0.011(3)       |
| C27  | 0.055(4)        | 0.049(3)        | 0.036(3)        | -0.009(3)       | 0.006(3)        | -0.012(3)       |
| C28  | 0.051(3)        | 0.034(3)        | 0.034(3)        | -0.003(3)       | 0.011(2)        | 0.001(2)        |
| C29  | 0.051(3)        | 0.027(3)        | 0.020(3)        | 0.008(2)        | 0.006(2)        | -0.003(2)       |
| C30  | 0.043(3)        | 0.030(3)        | 0.025(3)        | 0.007(2)        | 0.008(2)        | 0.000(2)        |
| C31  | 0.051(4)        | 0.035(3)        | 0.035(3)        | -0.010(2)       | 0.010(3)        | 0.002(3)        |
| C32  | 0.047(4)        | 0.050(3)        | 0.060(4)        | -0.010(3)       | 0.023(3)        | 0.009(3)        |
| C33  | 0.038(3)        | 0.060(4)        | 0.060(4)        | -0.006(3)       | 0.009(3)        | 0.005(3)        |
| C34  | 0.043(3)        | 0.046(3)        | 0.038(3)        | -0.003(3)       | 0.005(2)        | 0.004(3)        |
| C35  | 0.038(3)        | 0.027(3)        | 0.027(3)        | 0.003(2)        | 0.010(2)        | 0.007(2)        |
| C36  | 0.042(3)        | 0.028(3)        | 0.021(3)        | 0.010(2)        | 0.008(2)        | 0.000(2)        |
| C41  | 0.059(12)       | 0.104(19)       | 0.080(15)       | -0.011(12)      | 0.003(11)       | -0.007(12)      |
| C11  | 0.100(4)        | 0.135(5)        | 0.127(4)        | -0.005(4)       | 0.026(3)        | -0.043(3)       |
| C12  | 0.193(12)       | 0.136(7)        | 0.264(16)       | 0.029(8)        | -0.077(10)      | 0.061(7)        |
| C13  | 0.086(4)        | 0.186(8)        | 0.178(7)        | -0.090(7)       | -0.024(5)       | -0.013(4)       |
| C41B | 0.052(8)        | 0.073(9)        | 0.070(10)       | -0.011(8)       | -0.003(7)       | 0.008(8)        |
| C11B | 0.139(3)        | 0.207(5)        | 0.064(2)        | 0.019(3)        | -0.010(2)       | 0.031(3)        |
| C12B | 0.075(3)        | 0.062(3)        | 0.289(10)       | 0.019(4)        | 0.034(5)        | -0.002(2)       |
| C13B | 0.054(2)        | 0.074(3)        | 0.147(4)        | -0.031(3)       | -0.015(2)       | 0.009(2)        |

Tabelle S11: Bond lengths (Å) and angles (deg) for 5a.

|         |          |             |           |
|---------|----------|-------------|-----------|
| N11-C36 | 1.319(5) | C34-H34     | 0.9500    |
| N11-C12 | 1.361(5) | C35-C36     | 1.476(6)  |
| C12-N13 | 1.349(5) | C41-C11     | 1.738(13) |
| C12-C21 | 1.418(6) | C41-C13     | 1.742(13) |
| N13-C14 | 1.357(5) | C41-C12     | 1.745(13) |
| C14-C19 | 1.422(6) | C41-H41     | 1.0000    |
| C14-C15 | 1.422(6) | C41B-C13B   | 1.740(11) |
| C15-C16 | 1.342(6) | C41B-C11B   | 1.742(11) |
| C15-H15 | 0.9500   | C41B-C12B   | 1.748(11) |
| C16-C17 | 1.403(7) | C41B-H41B   | 1.0000    |
| C16-H16 | 0.9500   | C36-N11-C12 | 118.3(4)  |
| C17-C18 | 1.346(6) | N13-C12-N11 | 114.9(4)  |
| C17-H17 | 0.9500   | N13-C12-C21 | 122.7(4)  |
| C18-C19 | 1.425(6) | N11-C12-C21 | 122.4(4)  |
| C18-H18 | 0.9500   | C12-N13-C14 | 118.0(4)  |
| C19-C20 | 1.386(6) | N13-C14-C19 | 122.5(4)  |
| C20-C21 | 1.384(6) | N13-C14-C15 | 118.6(4)  |
| C20-H20 | 0.9500   | C19-C14-C15 | 118.8(4)  |
| C21-C22 | 1.418(6) | C16-C15-C14 | 120.1(5)  |
| C22-C23 | 1.373(6) | C16-C15-H15 | 119.9     |
| C22-H22 | 0.9500   | C14-C15-H15 | 119.9     |
| C23-C36 | 1.435(6) | C15-C16-C17 | 121.4(5)  |
| C23-C24 | 1.475(6) | C15-C16-H16 | 119.3     |
| C24-C25 | 1.400(6) | C17-C16-H16 | 119.3     |
| C24-C29 | 1.401(6) | C18-C17-C16 | 120.6(5)  |
| C25-C26 | 1.377(6) | C18-C17-H17 | 119.7     |
| C25-H25 | 0.9500   | C16-C17-H17 | 119.7     |
| C26-C27 | 1.383(6) | C17-C18-C19 | 120.5(5)  |
| C26-H26 | 0.9500   | C17-C18-H18 | 119.8     |
| C27-C28 | 1.370(6) | C19-C18-H18 | 119.8     |
| C27-H27 | 0.9500   | C20-C19-C14 | 118.3(4)  |
| C28-C29 | 1.404(6) | C20-C19-C18 | 123.2(5)  |
| C28-H28 | 0.9500   | C14-C19-C18 | 118.5(4)  |
| C29-C30 | 1.456(6) | C21-C20-C19 | 120.0(5)  |
| C30-C35 | 1.415(6) | C21-C20-H20 | 120.0     |
| C30-C31 | 1.419(6) | C19-C20-H20 | 120.0     |
| C31-C32 | 1.355(6) | C20-C21-C22 | 123.8(4)  |
| C31-H31 | 0.9500   | C20-C21-C12 | 118.5(4)  |
| C32-C33 | 1.376(7) | C22-C21-C12 | 117.7(4)  |
| C32-H32 | 0.9500   | C23-C22-C21 | 120.2(4)  |
| C33-C34 | 1.371(6) | C23-C22-H22 | 119.9     |
| C33-H33 | 0.9500   | C21-C22-H22 | 119.9     |
| C34-C35 | 1.389(6) | C22-C23-C36 | 117.3(4)  |

## SUPPORTING INFORMATION

---

|                |           |
|----------------|-----------|
| C22-C23-C24    | 122.9(4)  |
| C36-C23-C24    | 119.8(4)  |
| C25-C24-C29    | 119.1(4)  |
| C25-C24-C23    | 120.9(4)  |
| C29-C24-C23    | 120.1(4)  |
| C26-C25-C24    | 121.2(5)  |
| C26-C25-H25    | 119.4     |
| C24-C25-H25    | 119.4     |
| C25-C26-C27    | 120.0(5)  |
| C25-C26-H26    | 120.0     |
| C27-C26-H26    | 120.0     |
| C28-C27-C26    | 119.5(5)  |
| C28-C27-H27    | 120.2     |
| C26-C27-H27    | 120.2     |
| C27-C28-C29    | 122.0(5)  |
| C27-C28-H28    | 119.0     |
| C29-C28-H28    | 119.0     |
| C24-C29-C28    | 118.2(4)  |
| C24-C29-C30    | 120.4(4)  |
| C28-C29-C30    | 121.3(4)  |
| C35-C30-C31    | 116.6(4)  |
| C35-C30-C29    | 120.7(4)  |
| C31-C30-C29    | 122.7(4)  |
| C32-C31-C30    | 121.1(4)  |
| C32-C31-H31    | 119.4     |
| C30-C31-H31    | 119.4     |
| C31-C32-C33    | 122.0(5)  |
| C31-C32-H32    | 119.0     |
| C33-C32-H32    | 119.0     |
| C34-C33-C32    | 118.5(5)  |
| C34-C33-H33    | 120.7     |
| C32-C33-H33    | 120.7     |
| C33-C34-C35    | 121.5(5)  |
| C33-C34-H34    | 119.2     |
| C35-C34-H34    | 119.2     |
| C34-C35-C30    | 120.1(4)  |
| C34-C35-C36    | 120.1(4)  |
| C30-C35-C36    | 119.7(4)  |
| N11-C36-C23    | 124.2(4)  |
| N11-C36-C35    | 116.7(4)  |
| C23-C36-C35    | 119.1(4)  |
| CI1-C41-CI3    | 112.0(9)  |
| CI1-C41-CI2    | 112.5(10) |
| CI3-C41-CI2    | 107.8(11) |
| CI1-C41-H41    | 108.1     |
| CI3-C41-H41    | 108.1     |
| CI2-C41-H41    | 108.1     |
| CI3B-C41B-CI1B | 110.0(7)  |
| CI3B-C41B-CI2B | 109.4(8)  |
| CI1B-C41B-CI2B | 112.7(7)  |
| CI3B-C41B-H41B | 108.2     |
| CI1B-C41B-H41B | 108.2     |
| CI2B-C41B-H41B | 108.2     |



## SUPPORTING INFORMATION

## 6.3. Compound 17

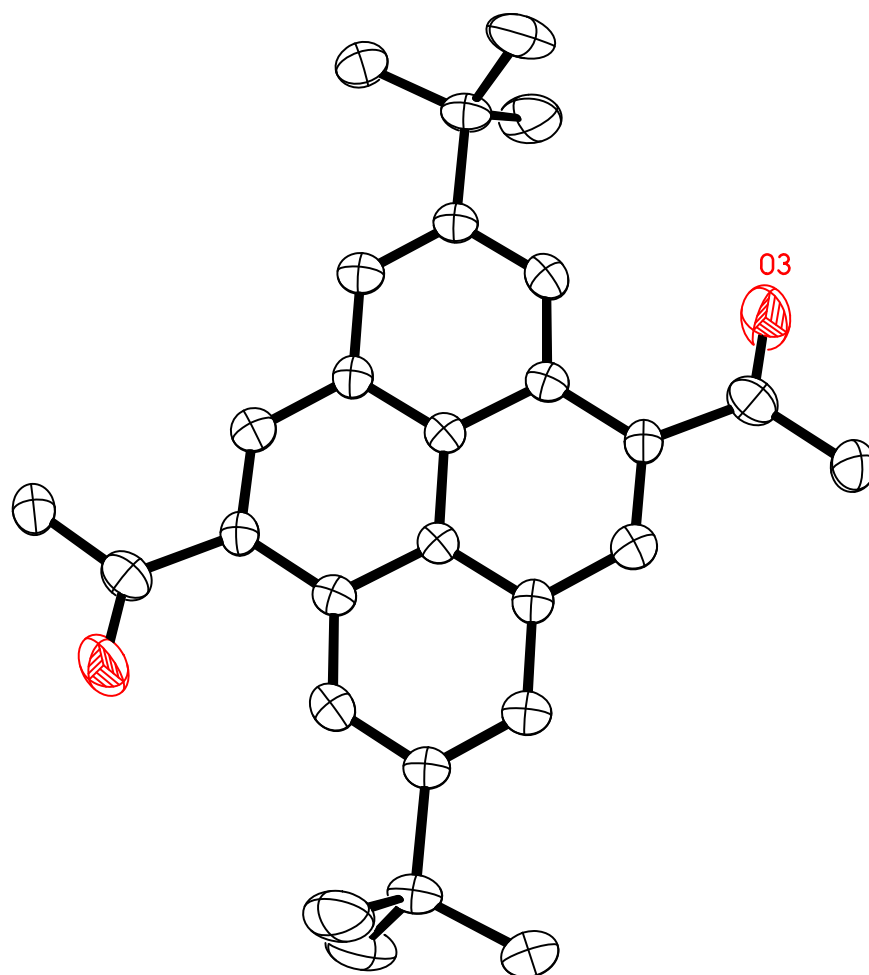

Figure S10: Crystal structure of 17.

Table S12: Crystal data and structure refinement for 17.

|                      |                                                |             |
|----------------------|------------------------------------------------|-------------|
| Identification code  | stu6                                           |             |
| Empirical formula    | C <sub>28</sub> H <sub>30</sub> O <sub>2</sub> |             |
| Formula weight       | 398.52                                         |             |
| Temperature          | 200(2) K                                       |             |
| Wavelength           | 1.54178 Å                                      |             |
| Crystal system       | orthorhombic                                   |             |
| Space group          | Pbam                                           |             |
| Z                    | 4                                              |             |
| Unit cell dimensions | a = 12.7159(13) Å                              | α = 90 deg. |
|                      | b = 23.425(2) Å                                | β = 90 deg. |
|                      | c = 7.1806(7) Å                                | γ = 90 deg. |
| Volume               | 2138.9(4) Å <sup>3</sup>                       |             |
| Density (calculated) | 1.24 g/cm <sup>3</sup>                         |             |

## SUPPORTING INFORMATION

|                                   |                                             |
|-----------------------------------|---------------------------------------------|
| Absorption coefficient            | 0.59 mm <sup>-1</sup>                       |
| Crystal shape                     | needle                                      |
| Crystal size                      | 0.190 x 0.018 x 0.015 mm <sup>3</sup>       |
| Crystal colour                    | pale yellow                                 |
| Theta range for data collection   | 3.8 to 56.0 deg.                            |
| Index ranges                      | -13 ≤ h ≤ 11, -24 ≤ k ≤ 25, -7 ≤ l ≤ 5      |
| Reflections collected             | 6544                                        |
| Independent reflections           | 1527 (R(int) = 0.1052)                      |
| Observed reflections              | 734 (I > 2σ(I))                             |
| Absorption correction             | Semi-empirical from equivalents             |
| Max. and min. transmission        | 1.67 and 0.78                               |
| Refinement method                 | Full-matrix least-squares on F <sup>2</sup> |
| Data/restraints/parameters        | 1527 / 200 / 195                            |
| Goodness-of-fit on F <sup>2</sup> | 0.96                                        |
| Final R indices (I > 2σ(I))       | R1 = 0.052, wR2 = 0.098                     |
| Largest diff. peak and hole       | 0.23 and -0.20 eÅ <sup>-3</sup>             |

**Table S13:** Atomic coordinates and equivalent isotropic displacement parameters (Å<sup>2</sup>) for **17**. U<sub>eq</sub> is defined as one third of the trace of the orthogonalized U<sub>ij</sub> tensor.

| Atom  | x          | y         | z          | U <sub>eq</sub> |
|-------|------------|-----------|------------|-----------------|
| C11   | -0.0496(4) | 0.3966(3) | 0.0000     | 0.0333(13)      |
| H11   | -0.0490    | 0.3560    | 0.0000     | 0.040           |
| C21   | -0.1445(4) | 0.4232(2) | 0.0000     | 0.0307(14)      |
| C31   | -0.2412(5) | 0.3881(3) | 0.029(3)   | 0.038(4)        |
| O31   | -0.3273(4) | 0.4084(2) | 0.0558(17) | 0.077(5)        |
| C41   | -0.2346(6) | 0.3239(3) | 0.020(8)   | 0.049(6)        |
| H4A1  | -0.3024    | 0.3084    | -0.0204    | 0.073           |
| H4B1  | -0.2171    | 0.3089    | 0.1435     | 0.073           |
| H4C1  | -0.1798    | 0.3127    | -0.0690    | 0.073           |
| C111  | 0.0486(4)  | 0.4847(2) | 0.0000     | 0.0247(12)      |
| C121  | 0.0485(4)  | 0.4252(2) | 0.0000     | 0.0290(13)      |
| C131  | 0.1436(4)  | 0.3955(2) | 0.0000     | 0.0311(13)      |
| H131  | 0.1424     | 0.3550    | 0.0000     | 0.037           |
| C141  | 0.2393(4)  | 0.4231(2) | 0.0000     | 0.0301(13)      |
| C151  | 0.2389(4)  | 0.4822(2) | 0.0000     | 0.0346(14)      |
| H151  | 0.3045     | 0.5016    | 0.0000     | 0.042           |
| C161  | 0.1464(4)  | 0.5152(2) | 0.0000     | 0.0283(13)      |
| C181  | 0.3453(4)  | 0.3921(2) | 0.0000     | 0.0361(14)      |
| C1811 | 0.3338(4)  | 0.3265(2) | 0.0000     | 0.0472(16)      |
| H18A1 | 0.4037     | 0.3088    | 0.0000     | 0.071           |
| H18B1 | 0.2952     | 0.3145    | 0.1114     | 0.071           |
| H18C1 | 0.2952     | 0.3145    | -0.1114    | 0.071           |
| C1821 | 0.4083(3)  | 0.4089(2) | 0.1744(6)  | 0.0585(13)      |
| H18D1 | 0.4761     | 0.3890    | 0.1739     | 0.088           |
| H18E1 | 0.4202     | 0.4502    | 0.1745     | 0.088           |
| H18F1 | 0.3686     | 0.3982    | 0.2861     | 0.088           |
| C12   | 0.8044(4)  | 0.5117(2) | 0.5000     | 0.0299(13)      |
| H12   | 0.7346     | 0.5262    | 0.5000     | 0.036           |
| C22   | 0.8171(4)  | 0.4534(2) | 0.5000     | 0.0326(14)      |
| C32   | 0.7210(5)  | 0.4183(3) | 0.527(3)   | 0.040(4)        |
| O32   | 0.7257(4)  | 0.3678(2) | 0.5734(9)  | 0.072(3)        |
| C42   | 0.6143(4)  | 0.4433(3) | 0.491(7)   | 0.049(3)        |
| H4A2  | 0.5604     | 0.4142    | 0.5135     | 0.074           |
| H4B2  | 0.6101     | 0.4562    | 0.3614     | 0.074           |
| H4C2  | 0.6028     | 0.4758    | 0.5746     | 0.074           |
| C112  | 0.9923(4)  | 0.5307(2) | 0.5000     | 0.0258(12)      |
| C122  | 0.8878(4)  | 0.5515(2) | 0.5000     | 0.0264(13)      |
| C132  | 0.8701(4)  | 0.6092(2) | 0.5000     | 0.0332(13)      |
| H132  | 0.7995     | 0.6225    | 0.5000     | 0.040           |
| C142  | 0.9512(5)  | 0.6493(2) | 0.5000     | 0.0320(13)      |
| C152  | 1.0538(4)  | 0.6274(2) | 0.5000     | 0.0341(14)      |
| H152  | 1.1106     | 0.6537    | 0.5000     | 0.041           |
| C162  | 1.0773(4)  | 0.5692(2) | 0.5000     | 0.0291(13)      |
| C182  | 0.9328(4)  | 0.7132(2) | 0.5000     | 0.0349(14)      |
| C1812 | 0.8160(4)  | 0.7270(3) | 0.5000     | 0.063(2)        |
| H18A2 | 0.7830     | 0.7104    | 0.6107     | 0.095           |
| H18B2 | 0.8064     | 0.7686    | 0.5014     | 0.095           |
| H18C2 | 0.7833     | 0.7111    | 0.3879     | 0.095           |
| C1822 | 0.9803(3)  | 0.7397(2) | 0.6731(6)  | 0.0708(15)      |
| H18D2 | 0.9490     | 0.7222    | 0.7840     | 0.106           |
| H18E2 | 1.0564     | 0.7332    | 0.6736     | 0.106           |
| H18F2 | 0.9663     | 0.7808    | 0.6736     | 0.106           |

**Table S14:** Hydrogen coordinates and isotropic displacement parameters (Å<sup>2</sup>) for **17**.

## SUPPORTING INFORMATION

| Atom  | x       | y      | z       | U <sub>eq</sub> |
|-------|---------|--------|---------|-----------------|
| H11   | -0.0490 | 0.3560 | 0.0000  | 0.040           |
| H4A1  | -0.3024 | 0.3084 | -0.0204 | 0.073           |
| H4B1  | -0.2171 | 0.3089 | 0.1435  | 0.073           |
| H4C1  | -0.1798 | 0.3127 | -0.0690 | 0.073           |
| H131  | 0.1424  | 0.3550 | 0.0000  | 0.037           |
| H151  | 0.3045  | 0.5016 | 0.0000  | 0.042           |
| H18A1 | 0.4037  | 0.3088 | 0.0000  | 0.071           |
| H18B1 | 0.2952  | 0.3145 | 0.1114  | 0.071           |
| H18C1 | 0.2952  | 0.3145 | -0.1114 | 0.071           |
| H18D1 | 0.4761  | 0.3890 | 0.1739  | 0.088           |
| H18E1 | 0.4202  | 0.4502 | 0.1745  | 0.088           |
| H18F1 | 0.3686  | 0.3982 | 0.2861  | 0.088           |
| H12   | 0.7346  | 0.5262 | 0.5000  | 0.036           |
| H4A2  | 0.5604  | 0.4142 | 0.5135  | 0.074           |
| H4B2  | 0.6101  | 0.4562 | 0.3614  | 0.074           |
| H4C2  | 0.6028  | 0.4758 | 0.5746  | 0.074           |
| H132  | 0.7995  | 0.6225 | 0.5000  | 0.040           |
| H152  | 1.1106  | 0.6537 | 0.5000  | 0.041           |
| H18A2 | 0.7830  | 0.7104 | 0.6107  | 0.095           |
| H18B2 | 0.8064  | 0.7686 | 0.5014  | 0.095           |
| H18C2 | 0.7833  | 0.7111 | 0.3879  | 0.095           |
| H18D2 | 0.9490  | 0.7222 | 0.7840  | 0.106           |
| H18E2 | 1.0564  | 0.7332 | 0.6736  | 0.106           |
| H18F2 | 0.9663  | 0.7808 | 0.6736  | 0.106           |

**Table S15:** Anisotropic displacement parameters (Å<sup>2</sup>) for **17**. The anisotropic displacement factor exponent takes the form:  $-2\pi^2(h^2 a^{*2} U_{11} + \dots + 2 h k a^* b^* U_{12})$

| Atom  | U <sub>11</sub> | U <sub>22</sub> | U <sub>33</sub> | U <sub>23</sub> | U <sub>13</sub> | U <sub>12</sub> |
|-------|-----------------|-----------------|-----------------|-----------------|-----------------|-----------------|
| C11   | 0.034(3)        | 0.032(3)        | 0.034(3)        | 0.000           | 0.000           | 0.001(3)        |
| C21   | 0.029(3)        | 0.026(3)        | 0.038(4)        | 0.000           | 0.000           | -0.003(3)       |
| C31   | 0.031(3)        | 0.048(4)        | 0.036(13)       | -0.002(5)       | 0.004(5)        | -0.001(3)       |
| O31   | 0.033(3)        | 0.047(3)        | 0.151(17)       | -0.005(4)       | 0.026(4)        | -0.004(3)       |
| C41   | 0.036(4)        | 0.035(3)        | 0.076(17)       | 0.007(10)       | 0.005(12)       | -0.005(3)       |
| C111  | 0.026(3)        | 0.029(3)        | 0.019(3)        | 0.000           | 0.000           | -0.001(2)       |
| C121  | 0.030(3)        | 0.028(3)        | 0.029(3)        | 0.000           | 0.000           | -0.002(3)       |
| C131  | 0.031(3)        | 0.036(3)        | 0.026(3)        | 0.000           | 0.000           | 0.003(3)        |
| C141  | 0.028(3)        | 0.032(3)        | 0.030(3)        | 0.000           | 0.000           | 0.003(3)        |
| C151  | 0.029(3)        | 0.039(3)        | 0.036(3)        | 0.000           | 0.000           | -0.004(3)       |
| C161  | 0.026(3)        | 0.031(3)        | 0.028(3)        | 0.000           | 0.000           | 0.001(3)        |
| C181  | 0.026(3)        | 0.041(3)        | 0.040(4)        | 0.000           | 0.000           | 0.009(3)        |
| C1811 | 0.042(4)        | 0.037(3)        | 0.062(4)        | 0.000           | 0.000           | 0.010(3)        |
| C1821 | 0.039(2)        | 0.070(3)        | 0.066(3)        | -0.014(3)       | -0.018(2)       | 0.017(2)        |
| C12   | 0.023(3)        | 0.034(3)        | 0.032(3)        | 0.000           | 0.000           | 0.003(2)        |
| C22   | 0.033(3)        | 0.026(3)        | 0.039(4)        | 0.000           | 0.000           | -0.002(3)       |
| C32   | 0.040(3)        | 0.027(3)        | 0.052(13)       | 0.004(6)        | 0.005(6)        | -0.001(3)       |
| O32   | 0.044(3)        | 0.041(3)        | 0.130(9)        | 0.017(3)        | 0.004(3)        | -0.008(3)       |
| C42   | 0.035(3)        | 0.040(4)        | 0.073(8)        | -0.010(17)      | -0.016(14)      | -0.008(3)       |
| C112  | 0.032(3)        | 0.025(3)        | 0.021(3)        | 0.000           | 0.000           | -0.001(2)       |
| C122  | 0.029(3)        | 0.022(3)        | 0.028(3)        | 0.000           | 0.000           | -0.001(2)       |
| C132  | 0.039(3)        | 0.030(3)        | 0.031(3)        | 0.000           | 0.000           | 0.001(3)        |
| C142  | 0.040(3)        | 0.026(3)        | 0.031(3)        | 0.000           | 0.000           | 0.001(3)        |
| C152  | 0.039(3)        | 0.032(3)        | 0.030(3)        | 0.000           | 0.000           | -0.004(3)       |
| C162  | 0.033(3)        | 0.022(3)        | 0.032(3)        | 0.000           | 0.000           | -0.001(2)       |
| C182  | 0.050(4)        | 0.023(3)        | 0.032(3)        | 0.000           | 0.000           | 0.004(3)        |
| C1812 | 0.059(4)        | 0.032(4)        | 0.100(5)        | 0.000           | 0.000           | 0.010(3)        |
| C1822 | 0.100(4)        | 0.044(3)        | 0.069(3)        | -0.018(3)       | -0.027(3)       | 0.007(3)        |

**Table S16:** Bond lengths (Å) and angles (deg) for **17**.

|             |          |              |          |
|-------------|----------|--------------|----------|
| C11-C21     | 1.359(7) | C111-C161    | 1.433(7) |
| C11-C121    | 1.416(7) | C121-C131    | 1.395(7) |
| C11-H11     | 0.9500   | C131-C141    | 1.377(7) |
| C21-C161#1  | 1.443(7) | C131-H131    | 0.9500   |
| C21-C31     | 1.494(8) | C141-C151    | 1.385(7) |
| C31-O31     | 1.210(8) | C141-C181    | 1.531(7) |
| C31-C41     | 1.507(8) | C151-C161    | 1.407(7) |
| C41-H4A1    | 0.9800   | C151-H151    | 0.9500   |
| C41-H4B1    | 0.9800   | C181-C1821   | 1.538(5) |
| C41-H4C1    | 0.9800   | C181-C1821#2 | 1.538(5) |
| C111-C121   | 1.395(7) | C181-C1811   | 1.545(8) |
| C111-C111#1 | 1.429(9) | C1811-H18A1  | 0.9800   |

## SUPPORTING INFORMATION

|                  |           |                    |          |
|------------------|-----------|--------------------|----------|
| C1811-H18B1      | 0.9800    | C141-C181-C1821#2  | 109.7(3) |
| C1811-H18C1      | 0.9800    | C1821-C181-C1821#2 | 109.1(4) |
| C1821-H18D1      | 0.9800    | C141-C181-C1811    | 112.8(5) |
| C1821-H18E1      | 0.9800    | C1821-C181-C1811   | 107.7(3) |
| C1821-H18F1      | 0.9800    | C1821#2-C181-C1811 | 107.7(3) |
| C12-C22          | 1.374(7)  | C181-C1811-H18A1   | 109.5    |
| C12-C122         | 1.412(7)  | C181-C1811-H18B1   | 109.5    |
| C12-H12          | 0.9500    | H18A1-C1811-H18B1  | 109.5    |
| C22-C162#3       | 1.443(7)  | C181-C1811-H18C1   | 109.5    |
| C22-C32          | 1.486(8)  | H18A1-C1811-H18C1  | 109.5    |
| C32-O32          | 1.230(9)  | H18B1-C1811-H18C1  | 109.5    |
| C32-C42          | 1.500(10) | C181-C1821-H18D1   | 109.5    |
| C42-H4A2         | 0.9800    | C181-C1821-H18E1   | 109.5    |
| C42-H4B2         | 0.9800    | H18D1-C1821-H18E1  | 109.5    |
| C42-H4C2         | 0.9800    | C181-C1821-H18F1   | 109.5    |
| C112-C162        | 1.407(7)  | H18D1-C1821-H18F1  | 109.5    |
| C112-C122        | 1.416(7)  | H18E1-C1821-H18F1  | 109.5    |
| C112-C112#3      | 1.452(10) | C22-C12-C122       | 124.6(5) |
| C122-C132        | 1.371(7)  | C22-C12-H12        | 117.7    |
| C132-C142        | 1.394(7)  | C122-C12-H12       | 117.7    |
| C132-H132        | 0.9500    | C12-C22-C162#3     | 118.3(5) |
| C142-C152        | 1.401(7)  | C12-C22-C32        | 117.0(5) |
| C142-C182        | 1.516(7)  | C162#3-C22-C32     | 124.2(5) |
| C152-C162        | 1.396(7)  | O32-C32-C22        | 121.8(6) |
| C152-H152        | 0.9500    | O32-C32-C42        | 117.8(7) |
| C182-C1822#4     | 1.515(5)  | C22-C32-C42        | 120.4(7) |
| C182-C1822       | 1.515(5)  | C32-C42-H4A2       | 109.5    |
| C182-C1812       | 1.520(7)  | C32-C42-H4B2       | 109.5    |
| C1812-H18A2      | 0.9800    | H4A2-C42-H4B2      | 109.5    |
| C1812-H18B2      | 0.9800    | C32-C42-H4C2       | 109.5    |
| C1812-H18C2      | 0.9800    | H4A2-C42-H4C2      | 109.5    |
| C1822-H18D2      | 0.9800    | H4B2-C42-H4C2      | 109.5    |
| C1822-H18E2      | 0.9800    | C162-C112-C122     | 120.0(5) |
| C1822-H18F2      | 0.9800    | C162-C112-C112#3   | 122.0(6) |
| C21-C11-C121     | 124.3(6)  | C122-C112-C112#3   | 117.9(6) |
| C21-C11-H11      | 117.8     | C132-C122-C12      | 121.9(5) |
| C121-C11-H11     | 117.8     | C132-C122-C112     | 119.6(5) |
| C11-C21-C161#1   | 118.3(5)  | C12-C122-C112      | 118.5(5) |
| C11-C21-C31      | 118.5(5)  | C122-C132-C142     | 122.8(5) |
| C161#1-C21-C31   | 122.5(5)  | C122-C132-H132     | 118.6    |
| O31-C31-C21      | 123.3(6)  | C142-C132-H132     | 118.6    |
| O31-C31-C41      | 116.8(7)  | C132-C142-C152     | 116.3(5) |
| C21-C31-C41      | 119.9(7)  | C132-C142-C182     | 123.4(5) |
| C31-C41-H4A1     | 109.5     | C152-C142-C182     | 120.3(5) |
| C31-C41-H4B1     | 109.5     | C162-C152-C142     | 123.8(5) |
| H4A1-C41-H4B1    | 109.5     | C162-C152-H152     | 118.1    |
| C31-C41-H4C1     | 109.5     | C142-C152-H152     | 118.1    |
| H4A1-C41-H4C1    | 109.5     | C152-C162-C112     | 117.4(5) |
| H4B1-C41-H4C1    | 109.5     | C152-C162-C22#3    | 123.9(5) |
| C121-C111-C111#1 | 120.0(6)  | C112-C162-C22#3    | 118.7(5) |
| C121-C111-C161   | 119.9(5)  | C1822#4-C182-C1822 | 110.2(5) |
| C111#1-C111-C161 | 120.1(6)  | C1822#4-C182-C142  | 110.1(3) |
| C111-C121-C131   | 119.8(5)  | C1822-C182-C142    | 110.1(3) |
| C111-C121-C11    | 118.4(5)  | C1822#4-C182-C1812 | 107.6(3) |
| C131-C121-C11    | 121.9(5)  | C1822-C182-C1812   | 107.6(3) |
| C141-C131-C121   | 122.2(5)  | C142-C182-C1812    | 111.2(5) |
| C141-C131-H131   | 118.9     | C182-C1812-H18A2   | 109.5    |
| C121-C131-H131   | 118.9     | C182-C1812-H18B2   | 109.5    |
| C131-C141-C151   | 117.8(5)  | H18A2-C1812-H18B2  | 109.5    |
| C131-C141-C181   | 123.7(5)  | C182-C1812-H18C2   | 109.5    |
| C151-C141-C181   | 118.5(5)  | H18A2-C1812-H18C2  | 109.5    |
| C141-C151-C161   | 123.5(5)  | H18B2-C1812-H18C2  | 109.5    |
| C141-C151-H151   | 118.3     | C182-C1822-H18D2   | 109.5    |
| C161-C151-H151   | 118.3     | C182-C1822-H18E2   | 109.5    |
| C151-C161-C111   | 116.9(5)  | H18D2-C1822-H18E2  | 109.5    |
| C151-C161-C21#1  | 124.2(5)  | C182-C1822-H18F2   | 109.5    |
| C111-C161-C21#1  | 118.9(5)  | H18D2-C1822-H18F2  | 109.5    |
| C141-C181-C1821  | 109.7(3)  | H18E2-C1822-H18F2  | 109.5    |

Symmetry transformations used to generate equivalent atoms:

#1 -x,-y+1,-z

#2 x,y,-z

#3 -x+2,-y+1,-z+1

#4 x,y,-z+1

## 6.4. Compound 5c

## SUPPORTING INFORMATION

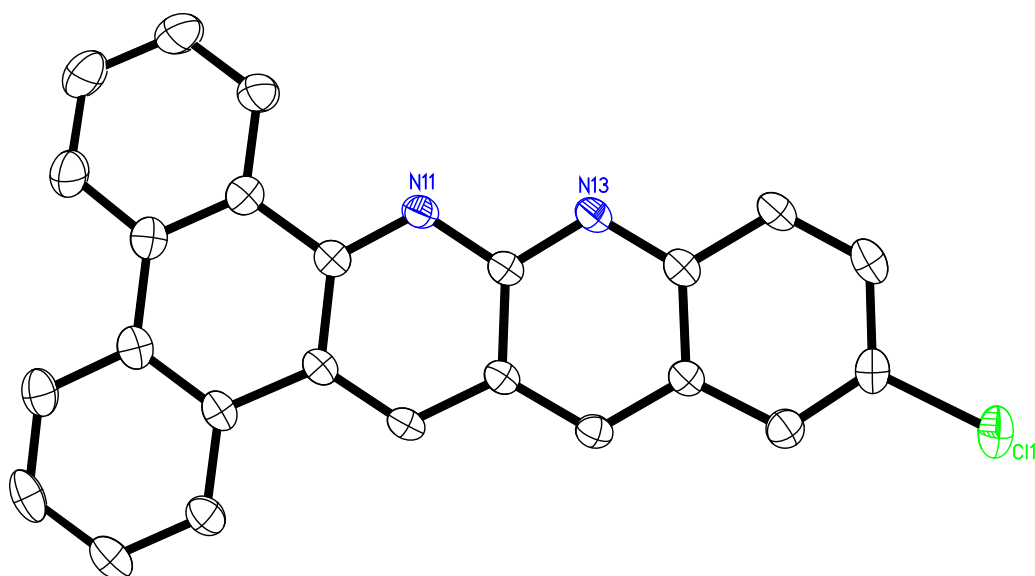Figure S11: Crystal structure of **5c**.Table S17: Crystal data and structure refinement for **5c**.

|                                   |                                                                |                             |
|-----------------------------------|----------------------------------------------------------------|-----------------------------|
| Identification code               | stu10                                                          |                             |
| Empirical formula                 | C <sub>25</sub> H <sub>14</sub> Cl <sub>4</sub> N <sub>2</sub> |                             |
| Formula weight                    | 484.18                                                         |                             |
| Temperature                       | 200(2) K                                                       |                             |
| Wavelength                        | 0.71073 Å                                                      |                             |
| Crystal system                    | triclinic                                                      |                             |
| Space group                       | P $\bar{1}$                                                    |                             |
| Z                                 | 2                                                              |                             |
| Unit cell dimensions              | a = 6.7171(6) Å                                                | $\alpha$ = 74.5286(15) deg. |
|                                   | b = 12.8506(11) Å                                              | $\beta$ = 86.0490(17) deg.  |
|                                   | c = 13.2342(11) Å                                              | $\gamma$ = 75.8886(15) deg. |
| Volume                            | 1067.73(16) Å <sup>3</sup>                                     |                             |
| Density (calculated)              | 1.51 g/cm <sup>3</sup>                                         |                             |
| Absorption coefficient            | 0.57 mm <sup>-1</sup>                                          |                             |
| Crystal shape                     | plank                                                          |                             |
| Crystal size                      | 0.358 x 0.045 x 0.027 mm <sup>3</sup>                          |                             |
| Crystal colour                    | yellow                                                         |                             |
| Theta range for data collection   | 1.6 to 28.7 deg.                                               |                             |
| Index ranges                      | -8 ≤ h ≤ 9, -16 ≤ k ≤ 17, -17 ≤ l ≤ 17                         |                             |
| Reflections collected             | 21274                                                          |                             |
| Independent reflections           | 5428 (R(int) = 0.0478)                                         |                             |
| Observed reflections              | 3643 (I > 2σ(I))                                               |                             |
| Absorption correction             | Semi-empirical from equivalents                                |                             |
| Max. and min. transmission        | 0.96 and 0.72                                                  |                             |
| Refinement method                 | Full-matrix least-squares on F <sup>2</sup>                    |                             |
| Data/restraints/parameters        | 5428 / 60 / 317                                                |                             |
| Goodness-of-fit on F <sup>2</sup> | 1.04                                                           |                             |
| Final R indices (I > 2σ(I))       | R1 = 0.043, wR2 = 0.098                                        |                             |
| Largest diff. peak and hole       | 0.33 and -0.33 eÅ <sup>-3</sup>                                |                             |

Table S18: Atomic coordinates and equivalent isotropic displacement parameters (Å<sup>2</sup>) for **5c**. U<sub>eq</sub> is defined as one third of the trace of the orthogonalized U<sub>ij</sub> tensor

| Atom | x         | y         | z         | U <sub>eq</sub> |
|------|-----------|-----------|-----------|-----------------|
| Cl1  | 0.3590(1) | 0.1748(1) | 1.0029(1) | 0.0417(2)       |
| N11  | 0.2886(2) | 0.4315(1) | 0.3830(1) | 0.0229(3)       |
| C12  | 0.2917(3) | 0.4114(2) | 0.4892(1) | 0.0205(4)       |

## SUPPORTING INFORMATION

|      |            |            |            |            |
|------|------------|------------|------------|------------|
| N13  | 0.3399(2)  | 0.3032(1)  | 0.5420(1)  | 0.0232(3)  |
| C14  | 0.3423(3)  | 0.2787(2)  | 0.6473(1)  | 0.0217(4)  |
| C15  | 0.3888(3)  | 0.1641(2)  | 0.7042(2)  | 0.0262(4)  |
| H15  | 0.4183     | 0.1081     | 0.6672     | 0.031      |
| C16  | 0.3912(3)  | 0.1348(2)  | 0.8103(2)  | 0.0285(4)  |
| H16  | 0.4211     | 0.0586     | 0.8473     | 0.034      |
| C17  | 0.3492(3)  | 0.2178(2)  | 0.8664(1)  | 0.0266(4)  |
| C18  | 0.3039(3)  | 0.3274(2)  | 0.8175(1)  | 0.0258(4)  |
| H18  | 0.2763     | 0.3811     | 0.8571     | 0.031      |
| C19  | 0.2980(3)  | 0.3615(2)  | 0.7056(1)  | 0.0212(4)  |
| C20  | 0.2511(3)  | 0.4723(2)  | 0.6495(1)  | 0.0224(4)  |
| H20  | 0.2223     | 0.5292     | 0.6855     | 0.027      |
| C21  | 0.2462(3)  | 0.4999(2)  | 0.5398(1)  | 0.0203(4)  |
| C22  | 0.1986(3)  | 0.6097(2)  | 0.4762(1)  | 0.0224(4)  |
| H22  | 0.1682     | 0.6699     | 0.5080     | 0.027      |
| C23  | 0.1957(3)  | 0.6309(2)  | 0.3691(1)  | 0.0207(4)  |
| C24  | 0.1510(3)  | 0.7435(2)  | 0.2984(1)  | 0.0231(4)  |
| C25  | 0.1027(3)  | 0.8373(2)  | 0.3386(2)  | 0.0283(4)  |
| H25  | 0.0935     | 0.8276     | 0.4124     | 0.034      |
| C26  | 0.0683(3)  | 0.9434(2)  | 0.2731(2)  | 0.0332(5)  |
| H26  | 0.0367     | 1.0058     | 0.3019     | 0.040      |
| C27  | 0.0798(3)  | 0.9585(2)  | 0.1658(2)  | 0.0356(5)  |
| H27  | 0.0575     | 1.0314     | 0.1207     | 0.043      |
| C28  | 0.1237(3)  | 0.8676(2)  | 0.1241(2)  | 0.0324(5)  |
| H28  | 0.1304     | 0.8790     | 0.0501     | 0.039      |
| C29  | 0.1588(3)  | 0.7587(2)  | 0.1888(1)  | 0.0256(4)  |
| C30  | 0.1985(3)  | 0.6618(2)  | 0.1447(1)  | 0.0260(4)  |
| C31  | 0.1959(3)  | 0.6727(2)  | 0.0360(2)  | 0.0381(5)  |
| H31  | 0.1755     | 0.7446     | -0.0109    | 0.046      |
| C32  | 0.2222(4)  | 0.5819(2)  | -0.0036(2) | 0.0473(6)  |
| H32  | 0.2194     | 0.5916     | -0.0772    | 0.057      |
| C33  | 0.2529(4)  | 0.4760(2)  | 0.0631(2)  | 0.0455(6)  |
| H33  | 0.2698     | 0.4133     | 0.0354     | 0.055      |
| C34  | 0.2586(3)  | 0.4621(2)  | 0.1696(2)  | 0.0347(5)  |
| H34  | 0.2798     | 0.3895     | 0.2153     | 0.042      |
| C35  | 0.2335(3)  | 0.5536(2)  | 0.2115(1)  | 0.0253(4)  |
| C36  | 0.2407(3)  | 0.5359(2)  | 0.3255(1)  | 0.0218(4)  |
| C41  | 0.5772(11) | 0.1770(7)  | 0.3644(6)  | 0.046(3)   |
| H41  | 0.4930     | 0.2320     | 0.4008     | 0.055      |
| Cl2  | 0.7085(5)  | 0.0643(3)  | 0.4598(2)  | 0.0440(9)  |
| Cl3  | 0.4112(7)  | 0.1398(3)  | 0.2929(3)  | 0.0696(10) |
| Cl4  | 0.7504(7)  | 0.2430(3)  | 0.2793(4)  | 0.0829(11) |
| C41B | 0.590(2)   | 0.1884(12) | 0.3599(9)  | 0.058(5)   |
| H41B | 0.4924     | 0.2432     | 0.3917     | 0.070      |
| Cl2B | 0.7018(12) | 0.0693(7)  | 0.4564(6)  | 0.089(3)   |
| Cl3B | 0.465(3)   | 0.1456(7)  | 0.2724(11) | 0.136(3)   |
| Cl4B | 0.7906(19) | 0.2440(6)  | 0.2957(7)  | 0.105(3)   |

**Table S19:** Hydrogen coordinates and isotropic displacement parameters ( $\text{\AA}^2$ ) for **5c**.

| Atom | x      | y      | z       | $U_{eq}$ |
|------|--------|--------|---------|----------|
| H15  | 0.4183 | 0.1081 | 0.6672  | 0.031    |
| H16  | 0.4211 | 0.0586 | 0.8473  | 0.034    |
| H18  | 0.2763 | 0.3811 | 0.8571  | 0.031    |
| H20  | 0.2223 | 0.5292 | 0.6855  | 0.027    |
| H22  | 0.1682 | 0.6699 | 0.5080  | 0.027    |
| H25  | 0.0935 | 0.8276 | 0.4124  | 0.034    |
| H26  | 0.0367 | 1.0058 | 0.3019  | 0.040    |
| H27  | 0.0575 | 1.0314 | 0.1207  | 0.043    |
| H28  | 0.1304 | 0.8790 | 0.0501  | 0.039    |
| H31  | 0.1755 | 0.7446 | -0.0109 | 0.046    |
| H32  | 0.2194 | 0.5916 | -0.0772 | 0.057    |
| H33  | 0.2698 | 0.4133 | 0.0354  | 0.055    |
| H34  | 0.2798 | 0.3895 | 0.2153  | 0.042    |
| H41  | 0.4930 | 0.2320 | 0.4008  | 0.055    |
| H41B | 0.4924 | 0.2432 | 0.3917  | 0.070    |

**Table S20:** Anisotropic displacement parameters ( $\text{\AA}^2$ ) for **5c**. The anisotropic displacement factor exponent takes the form:  $-2\pi^2(h^2 a^{*2} U_{11} + \dots + 2hk a^* b^* U_{12})$ 

| Atom | $U_{11}$  | $U_{22}$  | $U_{33}$  | $U_{23}$   | $U_{13}$   | $U_{12}$   |
|------|-----------|-----------|-----------|------------|------------|------------|
| Cl1  | 0.0548(4) | 0.0369(3) | 0.0253(2) | 0.0032(2)  | -0.0032(2) | -0.0075(3) |
| N11  | 0.0243(8) | 0.0194(8) | 0.0249(8) | -0.0071(6) | -0.0019(6) | -0.0032(7) |

## SUPPORTING INFORMATION

|      |            |            |            |             |             |             |
|------|------------|------------|------------|-------------|-------------|-------------|
| C12  | 0.0175(9)  | 0.0192(9)  | 0.0250(8)  | -0.0059(7)  | -0.0024(7)  | -0.0039(7)  |
| N13  | 0.0238(8)  | 0.0179(8)  | 0.0274(8)  | -0.0055(6)  | -0.0029(6)  | -0.0033(6)  |
| C14  | 0.0163(9)  | 0.0203(10) | 0.0280(9)  | -0.0048(7)  | -0.0020(7)  | -0.0046(7)  |
| C15  | 0.0248(10) | 0.0181(10) | 0.0347(10) | -0.0054(8)  | -0.0037(8)  | -0.0036(8)  |
| C16  | 0.0251(10) | 0.0206(10) | 0.0356(10) | 0.0002(8)   | -0.0049(8)  | -0.0042(8)  |
| C17  | 0.0242(10) | 0.0282(11) | 0.0243(9)  | 0.0001(8)   | -0.0025(7)  | -0.0074(8)  |
| C18  | 0.0247(10) | 0.0263(11) | 0.0268(9)  | -0.0063(8)  | -0.0024(8)  | -0.0065(8)  |
| C19  | 0.0186(9)  | 0.0201(9)  | 0.0254(9)  | -0.0054(7)  | -0.0025(7)  | -0.0049(7)  |
| C20  | 0.0212(9)  | 0.0204(10) | 0.0257(9)  | -0.0075(7)  | -0.0014(7)  | -0.0032(8)  |
| C21  | 0.0175(9)  | 0.0181(9)  | 0.0253(8)  | -0.0056(7)  | -0.0025(7)  | -0.0035(7)  |
| C22  | 0.0221(9)  | 0.0170(9)  | 0.0288(9)  | -0.0075(7)  | -0.0019(7)  | -0.0036(7)  |
| C23  | 0.0153(9)  | 0.0185(9)  | 0.0269(9)  | -0.0040(7)  | -0.0020(7)  | -0.0030(7)  |
| C24  | 0.0185(9)  | 0.0205(10) | 0.0286(9)  | -0.0018(7)  | -0.0044(7)  | -0.0052(8)  |
| C25  | 0.0278(10) | 0.0226(10) | 0.0326(10) | -0.0051(8)  | -0.0031(8)  | -0.0035(8)  |
| C26  | 0.0327(11) | 0.0209(11) | 0.0441(12) | -0.0044(9)  | -0.0047(9)  | -0.0060(9)  |
| C27  | 0.0325(12) | 0.0219(11) | 0.0434(12) | 0.0081(9)   | -0.0074(9)  | -0.0054(9)  |
| C28  | 0.0322(11) | 0.0297(12) | 0.0301(10) | 0.0024(8)   | -0.0060(8)  | -0.0070(9)  |
| C29  | 0.0194(9)  | 0.0263(11) | 0.0281(9)  | -0.0013(8)  | -0.0044(7)  | -0.0050(8)  |
| C30  | 0.0200(9)  | 0.0297(11) | 0.0258(9)  | -0.0033(8)  | -0.0039(7)  | -0.0045(8)  |
| C31  | 0.0450(13) | 0.0377(13) | 0.0262(10) | -0.0017(9)  | -0.0035(9)  | -0.0060(11) |
| C32  | 0.0651(17) | 0.0524(16) | 0.0232(10) | -0.0108(10) | -0.0045(10) | -0.0094(13) |
| C33  | 0.0628(17) | 0.0435(14) | 0.0321(11) | -0.0175(10) | -0.0034(11) | -0.0069(12) |
| C34  | 0.0451(13) | 0.0293(12) | 0.0297(10) | -0.0098(9)  | -0.0055(9)  | -0.0047(10) |
| C35  | 0.0209(9)  | 0.0288(11) | 0.0257(9)  | -0.0067(8)  | -0.0027(7)  | -0.0045(8)  |
| C36  | 0.0170(9)  | 0.0225(10) | 0.0261(9)  | -0.0058(7)  | -0.0017(7)  | -0.0050(7)  |
| C41  | 0.056(4)   | 0.032(4)   | 0.058(5)   | -0.030(3)   | 0.019(4)    | -0.010(3)   |
| Cl2  | 0.0499(15) | 0.0541(18) | 0.0294(12) | -0.0108(11) | -0.0027(9)  | -0.0141(12) |
| Cl3  | 0.1033(18) | 0.0362(12) | 0.0710(12) | -0.0055(12) | -0.0424(12) | -0.0174(13) |
| Cl4  | 0.0842(19) | 0.0399(15) | 0.101(2)   | 0.0052(14)  | 0.0397(13)  | -0.0080(10) |
| C41B | 0.103(11)  | 0.028(6)   | 0.046(7)   | -0.009(5)   | -0.039(7)   | -0.011(6)   |
| Cl2B | 0.112(5)   | 0.075(5)   | 0.068(4)   | -0.010(3)   | -0.013(3)   | -0.007(4)   |
| Cl3B | 0.210(8)   | 0.064(4)   | 0.134(5)   | -0.062(4)   | -0.116(5)   | 0.040(3)    |
| Cl4B | 0.188(7)   | 0.044(3)   | 0.097(3)   | -0.044(3)   | 0.040(3)    | -0.036(3)   |

Table S21: Bond lengths (Å) and angles (deg) for 5c.

|         |            |             |            |
|---------|------------|-------------|------------|
| C11-C17 | 1.7431(19) | C41-Cl2     | 1.740(7)   |
| N11-C36 | 1.327(2)   | C41-Cl4     | 1.769(7)   |
| N11-C12 | 1.361(2)   | C41-H41     | 1.0000     |
| C12-N13 | 1.348(2)   | C41B-Cl4B   | 1.741(12)  |
| C12-C21 | 1.430(2)   | C41B-Cl3B   | 1.749(11)  |
| N13-C14 | 1.345(2)   | C41B-Cl2B   | 1.750(11)  |
| C14-C15 | 1.432(3)   | C41B-H41B   | 1.0000     |
| C14-C19 | 1.438(2)   | C36-N11-C12 | 118.90(15) |
| C15-C16 | 1.353(3)   | N13-C12-N11 | 115.30(15) |
| C15-H15 | 0.9500     | N13-C12-C21 | 123.17(16) |
| C16-C17 | 1.419(3)   | N11-C12-C21 | 121.53(16) |
| C16-H16 | 0.9500     | C14-N13-C12 | 117.72(15) |
| C17-C18 | 1.351(3)   | N13-C14-C15 | 118.21(16) |
| C18-C19 | 1.429(2)   | N13-C14-C19 | 123.39(16) |
| C18-H18 | 0.9500     | C15-C14-C19 | 118.40(16) |
| C19-C20 | 1.388(3)   | C16-C15-C14 | 120.60(18) |
| C20-C21 | 1.400(2)   | C16-C15-H15 | 119.7      |
| C20-H20 | 0.9500     | C14-C15-H15 | 119.7      |
| C21-C22 | 1.409(2)   | C15-C16-C17 | 120.17(18) |
| C22-C23 | 1.371(2)   | C15-C16-H16 | 119.9      |
| C22-H22 | 0.9500     | C17-C16-H16 | 119.9      |
| C23-C36 | 1.444(2)   | C18-C17-C16 | 122.24(17) |
| C23-C24 | 1.470(2)   | C18-C17-Cl1 | 119.78(15) |
| C24-C25 | 1.404(3)   | C16-C17-Cl1 | 117.98(14) |
| C24-C29 | 1.410(3)   | C17-C18-C19 | 119.20(17) |
| C25-C26 | 1.381(3)   | C17-C18-H18 | 120.4      |
| C25-H25 | 0.9500     | C19-C18-H18 | 120.4      |
| C26-C27 | 1.380(3)   | C20-C19-C18 | 122.72(17) |
| C26-H26 | 0.9500     | C20-C19-C14 | 117.88(16) |
| C27-C28 | 1.382(3)   | C18-C19-C14 | 119.40(16) |
| C27-H27 | 0.9500     | C19-C20-C21 | 119.77(17) |
| C28-C29 | 1.405(3)   | C19-C20-H20 | 120.1      |
| C28-H28 | 0.9500     | C21-C20-H20 | 120.1      |
| C29-C30 | 1.472(3)   | C20-C21-C22 | 123.97(16) |
| C30-C35 | 1.407(3)   | C20-C21-C12 | 118.07(16) |
| C30-C31 | 1.409(3)   | C22-C21-C12 | 117.96(16) |
| C31-C32 | 1.371(3)   | C23-C22-C21 | 121.00(17) |
| C31-H31 | 0.9500     | C23-C22-H22 | 119.5      |
| C32-C33 | 1.386(3)   | C21-C22-H22 | 119.5      |
| C32-H32 | 0.9500     | C22-C23-C36 | 116.85(16) |
| C33-C34 | 1.374(3)   | C22-C23-C24 | 123.60(16) |
| C33-H33 | 0.9500     | C36-C23-C24 | 119.55(16) |
| C34-C35 | 1.399(3)   | C25-C24-C29 | 118.96(17) |
| C34-H34 | 0.9500     | C25-C24-C23 | 120.74(17) |
| C35-C36 | 1.467(2)   | C29-C24-C23 | 120.30(17) |
| C41-Cl3 | 1.736(7)   | C26-C25-C24 | 121.28(19) |

## SUPPORTING INFORMATION

---

|                |            |
|----------------|------------|
| C26-C25-H25    | 119.4      |
| C24-C25-H25    | 119.4      |
| C27-C26-C25    | 119.89(19) |
| C27-C26-H26    | 120.1      |
| C25-C26-H26    | 120.1      |
| C26-C27-C28    | 120.01(19) |
| C26-C27-H27    | 120.0      |
| C28-C27-H27    | 120.0      |
| C27-C28-C29    | 121.40(19) |
| C27-C28-H28    | 119.3      |
| C29-C28-H28    | 119.3      |
| C28-C29-C24    | 118.44(18) |
| C28-C29-C30    | 121.63(17) |
| C24-C29-C30    | 119.92(17) |
| C35-C30-C31    | 117.45(18) |
| C35-C30-C29    | 120.35(17) |
| C31-C30-C29    | 122.15(18) |
| C32-C31-C30    | 121.5(2)   |
| C32-C31-H31    | 119.3      |
| C30-C31-H31    | 119.3      |
| C31-C32-C33    | 120.5(2)   |
| C31-C32-H32    | 119.8      |
| C33-C32-H32    | 119.8      |
| C34-C33-C32    | 119.6(2)   |
| C34-C33-H33    | 120.2      |
| C32-C33-H33    | 120.2      |
| C33-C34-C35    | 120.8(2)   |
| C33-C34-H34    | 119.6      |
| C35-C34-H34    | 119.6      |
| C34-C35-C30    | 120.15(17) |
| C34-C35-C36    | 119.41(18) |
| C30-C35-C36    | 120.43(17) |
| N11-C36-C23    | 123.74(16) |
| N11-C36-C35    | 117.03(16) |
| C23-C36-C35    | 119.22(16) |
| Cl3-C41-Cl2    | 112.3(5)   |
| Cl3-C41-Cl4    | 110.3(4)   |
| Cl2-C41-Cl4    | 110.9(4)   |
| Cl3-C41-H41    | 107.7      |
| Cl2-C41-H41    | 107.7      |
| Cl4-C41-H41    | 107.7      |
| Cl4B-C41B-Cl3B | 109.7(8)   |
| Cl4B-C41B-Cl2B | 106.7(8)   |
| Cl3B-C41B-Cl2B | 107.2(8)   |
| Cl4B-C41B-H41B | 111.0      |
| Cl3B-C41B-H41B | 111.0      |
| Cl2B-C41B-H41B | 111.0      |



## SUPPORTING INFORMATION

Symmetry transformations used to generate equivalent atoms:

- #1  $-x, -y+1, -z$   
 #2  $x, y, -z$   
 #3  $-x+2, -y+1, -z+1$   
 #4  $x, y, -z+1$

## 6.5. Compound 5e

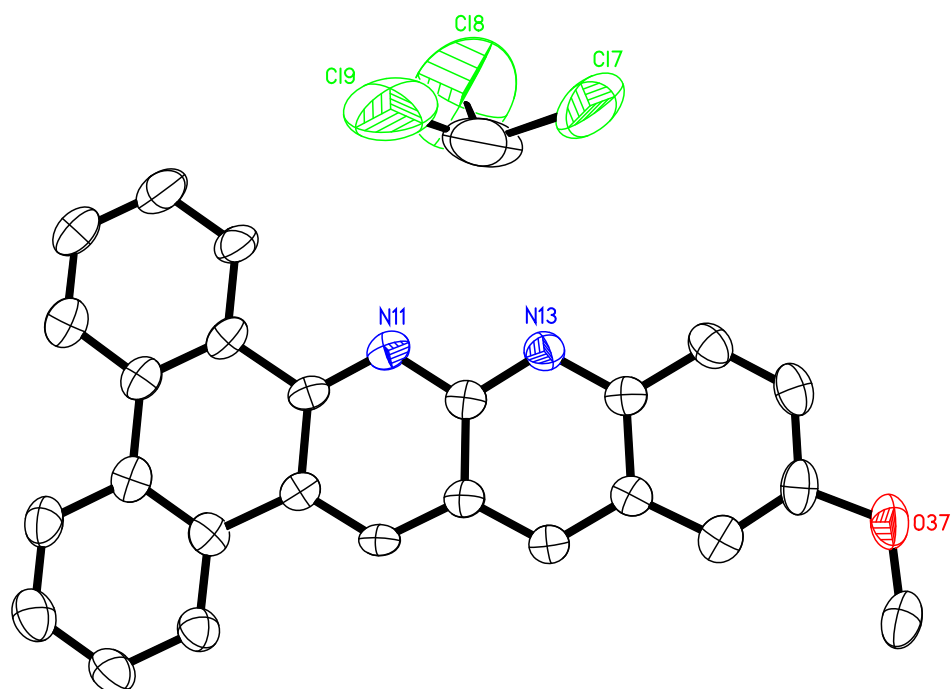

Figure S12: Crystal structure of 5e.

Table S22: Crystal data and structure refinement for 5e.

|                                 |                                                            |                            |
|---------------------------------|------------------------------------------------------------|----------------------------|
| Identification code             | stu11                                                      |                            |
| Empirical formula               | $C_{26}H_{17}Cl_3N_2O$                                     |                            |
| Formula weight                  | 479.76                                                     |                            |
| Temperature                     | 200(2) K                                                   |                            |
| Wavelength                      | 0.71073 Å                                                  |                            |
| Crystal system                  | triclinic                                                  |                            |
| Space group                     | $P \bar{1}$                                                |                            |
| Z                               | 16                                                         |                            |
| Unit cell dimensions            | $a = 16.0921(6)$ Å                                         | $\alpha = 94.8507(9)$ deg. |
|                                 | $b = 21.2352(7)$ Å                                         | $\beta = 94.9313(10)$ deg. |
|                                 | $c = 26.5244(9)$ Å                                         | $\gamma = 92.6591(9)$ deg. |
| Volume                          | $8984.8(5)$ Å <sup>3</sup>                                 |                            |
| Density (calculated)            | 1.42 g/cm <sup>3</sup>                                     |                            |
| Absorption coefficient          | 0.43 mm <sup>-1</sup>                                      |                            |
| Crystal shape                   | plank                                                      |                            |
| Crystal size                    | 0.125 x 0.053 x 0.048 mm <sup>3</sup>                      |                            |
| Crystal colour                  | orange                                                     |                            |
| Theta range for data collection | 0.8 to 25.5 deg.                                           |                            |
| Index ranges                    | $-19 \leq h \leq 19, -25 \leq k \leq 25, 0 \leq l \leq 32$ |                            |
| Reflections collected           | 49879                                                      |                            |
| Independent reflections         | 49879 (R(int) = ?)                                         |                            |
| Observed reflections            | 16344 ( $I > 2\sigma(I)$ )                                 |                            |
| Absorption correction           | Semi-empirical from equivalents                            |                            |

## SUPPORTING INFORMATION

|                                      |                                    |
|--------------------------------------|------------------------------------|
| Max. and min. transmission           | 0.95 and 0.83                      |
| Refinement method                    | Full-matrix least-squares on $F^2$ |
| Data/restraints/parameters           | 49879 / 5944 / 2610                |
| Goodness-of-fit on $F^2$             | 1.02                               |
| Final R indices ( $I > 2\sigma(I)$ ) | R1 = 0.086, wR2 = 0.200            |
| Largest diff. peak and hole          | 0.69 and -0.54 eÅ <sup>-3</sup>    |

**Table S23:** Atomic coordinates and equivalent isotropic displacement parameters (Å<sup>2</sup>) for **5e**.  $U_{eq}$  is defined as one third of the trace of the orthogonalized  $U_{ij}$  tensor.

| Atom  | x         | y         | z         | $U_{eq}$   |
|-------|-----------|-----------|-----------|------------|
| N111  | 0.8829(3) | 0.4230(2) | 0.9688(2) | 0.0320(14) |
| C121  | 0.9278(4) | 0.4529(3) | 0.9365(2) | 0.0281(16) |
| N131  | 0.9574(4) | 0.4157(2) | 0.8994(2) | 0.0359(15) |
| C141  | 1.0046(4) | 0.4422(3) | 0.8664(3) | 0.0332(17) |
| C151  | 1.0366(4) | 0.4038(3) | 0.8270(3) | 0.0423(19) |
| H151  | 1.0262    | 0.3592    | 0.8248    | 0.051      |
| C161  | 1.0814(4) | 0.4297(3) | 0.7927(3) | 0.046(2)   |
| H161  | 1.1012    | 0.4030    | 0.7662    | 0.055      |
| C171  | 1.0995(5) | 0.4952(4) | 0.7952(3) | 0.0427(19) |
| C181  | 1.0683(4) | 0.5343(3) | 0.8308(3) | 0.0385(18) |
| H181  | 1.0791    | 0.5788    | 0.8312    | 0.046      |
| C191  | 1.0197(4) | 0.5100(3) | 0.8674(2) | 0.0292(16) |
| C201  | 0.9887(4) | 0.5470(3) | 0.9060(2) | 0.0287(16) |
| H201  | 1.0002    | 0.5915    | 0.9088    | 0.034      |
| C211  | 0.9408(4) | 0.5206(3) | 0.9409(3) | 0.0296(16) |
| C221  | 0.9070(4) | 0.5533(3) | 0.9806(2) | 0.0263(16) |
| H221  | 0.9159    | 0.5981    | 0.9850    | 0.032      |
| C231  | 0.8613(4) | 0.5243(3) | 1.0139(2) | 0.0283(16) |
| C241  | 0.8211(4) | 0.5589(3) | 1.0551(2) | 0.0332(17) |
| C251  | 0.8296(5) | 0.6246(3) | 1.0631(3) | 0.041(2)   |
| H251  | 0.8658    | 0.6472    | 1.0437    | 0.049      |
| C261  | 0.7866(5) | 0.6576(3) | 1.0987(3) | 0.050(2)   |
| H261  | 0.7929    | 0.7025    | 1.1037    | 0.060      |
| C271  | 0.7339(5) | 0.6242(3) | 1.1272(3) | 0.051(2)   |
| H271  | 0.7034    | 0.6462    | 1.1515    | 0.061      |
| C281  | 0.7262(5) | 0.5600(3) | 1.1203(3) | 0.048(2)   |
| H281  | 0.6897    | 0.5378    | 1.1398    | 0.057      |
| C291  | 0.7705(4) | 0.5255(3) | 1.0850(3) | 0.0342(17) |
| C301  | 0.7632(4) | 0.4551(3) | 1.0787(3) | 0.0349(17) |
| C311  | 0.7182(4) | 0.4202(3) | 1.1111(3) | 0.045(2)   |
| H311  | 0.6918    | 0.4419    | 1.1376    | 0.054      |
| C321  | 0.7117(5) | 0.3554(3) | 1.1050(3) | 0.050(2)   |
| H321  | 0.6797    | 0.3327    | 1.1267    | 0.060      |
| C331  | 0.7518(5) | 0.3224(3) | 1.0672(3) | 0.057(2)   |
| H331  | 0.7483    | 0.2774    | 1.0634    | 0.068      |
| C341  | 0.7966(4) | 0.3559(3) | 1.0352(3) | 0.046(2)   |
| H341  | 0.8234    | 0.3338    | 1.0090    | 0.056      |
| C351  | 0.8029(4) | 0.4223(3) | 1.0411(3) | 0.0375(18) |
| C361  | 0.8513(4) | 0.4563(3) | 1.0064(2) | 0.0287(16) |
| O371  | 1.1494(3) | 0.5136(3) | 0.7592(2) | 0.0519(15) |
| C371  | 1.1736(5) | 0.5786(3) | 0.7600(3) | 0.053(2)   |
| H37A1 | 1.2088    | 0.5849    | 0.7323    | 0.080      |
| H37B1 | 1.2050    | 0.5927    | 0.7926    | 0.080      |
| H37C1 | 1.1237    | 0.6030    | 0.7556    | 0.080      |
| N112  | 0.8537(3) | 0.5844(2) | 0.8011(2) | 0.0311(14) |
| C122  | 0.8077(4) | 0.5541(3) | 0.8338(2) | 0.0298(16) |
| N132  | 0.7790(4) | 0.5918(2) | 0.8711(2) | 0.0347(15) |
| C142  | 0.7331(4) | 0.5637(3) | 0.9043(2) | 0.0301(16) |
| C152  | 0.7024(4) | 0.6025(3) | 0.9441(3) | 0.0367(18) |
| H152  | 0.7133    | 0.6470    | 0.9466    | 0.044      |
| C162  | 0.6580(4) | 0.5759(3) | 0.9782(3) | 0.0376(18) |
| H162  | 0.6395    | 0.6022    | 1.0053    | 0.045      |
| C172  | 0.6379(5) | 0.5096(3) | 0.9750(3) | 0.0358(18) |
| C182  | 0.6672(4) | 0.4716(3) | 0.9380(2) | 0.0310(17) |
| H182  | 0.6554    | 0.4272    | 0.9365    | 0.037      |
| C192  | 0.7151(4) | 0.4967(3) | 0.9013(2) | 0.0282(16) |
| C202  | 0.7462(4) | 0.4597(3) | 0.8627(2) | 0.0304(17) |
| H202  | 0.7358    | 0.4151    | 0.8599    | 0.037      |
| C212  | 0.7927(4) | 0.4874(3) | 0.8280(2) | 0.0250(15) |
| C222  | 0.8263(4) | 0.4536(3) | 0.7872(2) | 0.0292(16) |
| H222  | 0.8170    | 0.4089    | 0.7825    | 0.035      |
| C232  | 0.8715(4) | 0.4830(3) | 0.7545(2) | 0.0311(16) |
| C242  | 0.9083(4) | 0.4494(3) | 0.7119(2) | 0.0333(17) |
| C252  | 0.8988(5) | 0.3831(3) | 0.7026(3) | 0.0424(19) |
| H252  | 0.8656    | 0.3599    | 0.7233    | 0.051      |
| C262  | 0.9357(5) | 0.3516(4) | 0.6650(3) | 0.051(2)   |
| H262  | 0.9274    | 0.3069    | 0.6593    | 0.061      |
| C272  | 0.9860(5) | 0.3841(3) | 0.6344(3) | 0.051(2)   |
| H272  | 1.0130    | 0.3619    | 0.6084    | 0.062      |

## SUPPORTING INFORMATION

|       |           |           |           |            |
|-------|-----------|-----------|-----------|------------|
| C282  | 0.9959(5) | 0.4490(3) | 0.6426(3) | 0.048(2)   |
| H282  | 1.0299    | 0.4713    | 0.6217    | 0.057      |
| C292  | 0.9574(4) | 0.4832(3) | 0.6807(2) | 0.0373(18) |
| C302  | 0.9658(4) | 0.5525(3) | 0.6876(3) | 0.0392(18) |
| C312  | 1.0065(5) | 0.5876(3) | 0.6538(3) | 0.048(2)   |
| H312  | 1.0276    | 0.5664    | 0.6250    | 0.057      |
| C322  | 1.0164(5) | 0.6523(4) | 0.6618(3) | 0.057(2)   |
| H322  | 1.0471    | 0.6750    | 0.6395    | 0.069      |
| C332  | 0.9824(5) | 0.6854(4) | 0.7019(3) | 0.060(2)   |
| H332  | 0.9880    | 0.7303    | 0.7066    | 0.072      |
| C342  | 0.9402(5) | 0.6511(3) | 0.7350(3) | 0.050(2)   |
| H342  | 0.9174    | 0.6728    | 0.7629    | 0.061      |
| C352  | 0.9308(4) | 0.5858(3) | 0.7278(3) | 0.0386(18) |
| C362  | 0.8835(4) | 0.5508(3) | 0.7628(2) | 0.0307(16) |
| O372  | 0.5913(3) | 0.4900(2) | 1.0118(2) | 0.0401(13) |
| C372  | 0.5646(5) | 0.4247(3) | 1.0067(3) | 0.044(2)   |
| H37A2 | 0.5272    | 0.4164    | 1.0329    | 0.066      |
| H37B2 | 0.6133    | 0.3990    | 1.0106    | 0.066      |
| H37C2 | 0.5348    | 0.4138    | 0.9730    | 0.066      |
| N113  | 0.6494(3) | 0.4218(2) | 0.7016(2) | 0.0291(14) |
| C123  | 0.6944(4) | 0.4519(3) | 0.6692(2) | 0.0240(15) |
| N133  | 0.7225(4) | 0.4136(2) | 0.6318(2) | 0.0322(14) |
| C143  | 0.7679(4) | 0.4398(3) | 0.5974(2) | 0.0308(17) |
| C153  | 0.7976(4) | 0.4014(3) | 0.5576(2) | 0.0332(17) |
| H153  | 0.7862    | 0.3569    | 0.5554    | 0.040      |
| C163  | 0.8419(4) | 0.4266(3) | 0.5224(3) | 0.0365(18) |
| H163  | 0.8595    | 0.3998    | 0.4953    | 0.044      |
| C173  | 0.8627(5) | 0.4927(3) | 0.5255(3) | 0.0339(18) |
| C183  | 0.8340(4) | 0.5313(3) | 0.5622(2) | 0.0316(17) |
| H183  | 0.8462    | 0.5756    | 0.5633    | 0.038      |
| C193  | 0.7858(4) | 0.5070(3) | 0.5994(2) | 0.0281(16) |
| C203  | 0.7559(4) | 0.5454(3) | 0.6379(2) | 0.0299(17) |
| H203  | 0.7672    | 0.5899    | 0.6401    | 0.036      |
| C213  | 0.7097(4) | 0.5188(3) | 0.6729(2) | 0.0270(16) |
| C223  | 0.6754(4) | 0.5526(3) | 0.7131(2) | 0.0253(15) |
| H223  | 0.6839    | 0.5974    | 0.7170    | 0.030      |
| C233  | 0.6306(4) | 0.5242(3) | 0.7467(2) | 0.0277(16) |
| C243  | 0.5929(4) | 0.5584(3) | 0.7885(2) | 0.0320(17) |
| C253  | 0.6004(4) | 0.6247(3) | 0.7965(3) | 0.0386(18) |
| H253  | 0.6326    | 0.6476    | 0.7751    | 0.046      |
| C263  | 0.5628(5) | 0.6570(3) | 0.8342(3) | 0.049(2)   |
| H263  | 0.5709    | 0.7018    | 0.8395    | 0.058      |
| C273  | 0.5129(5) | 0.6248(3) | 0.8647(3) | 0.050(2)   |
| H273  | 0.4845    | 0.6472    | 0.8899    | 0.060      |
| C283  | 0.5050(5) | 0.5600(3) | 0.8579(3) | 0.045(2)   |
| H283  | 0.4719    | 0.5380    | 0.8794    | 0.054      |
| C293  | 0.5442(4) | 0.5252(3) | 0.8205(2) | 0.0335(17) |
| C303  | 0.5385(4) | 0.4560(3) | 0.8154(2) | 0.0348(17) |
| C313  | 0.4985(4) | 0.4212(3) | 0.8502(3) | 0.043(2)   |
| H313  | 0.4752    | 0.4431    | 0.8779    | 0.052      |
| C323  | 0.4926(5) | 0.3564(3) | 0.8449(3) | 0.054(2)   |
| H323  | 0.4632    | 0.3338    | 0.8679    | 0.065      |
| C333  | 0.5296(5) | 0.3237(4) | 0.8058(3) | 0.058(2)   |
| H333  | 0.5267    | 0.2787    | 0.8027    | 0.069      |
| C343  | 0.5703(5) | 0.3562(3) | 0.7715(3) | 0.045(2)   |
| H343  | 0.5952    | 0.3336    | 0.7448    | 0.054      |
| C353  | 0.5749(4) | 0.4221(3) | 0.7761(2) | 0.0355(17) |
| C363  | 0.6198(4) | 0.4562(3) | 0.7399(2) | 0.0276(16) |
| O373  | 0.9085(3) | 0.5112(2) | 0.4879(2) | 0.0385(12) |
| C373  | 0.9359(5) | 0.5761(3) | 0.4922(3) | 0.0409(19) |
| H37A3 | 0.9738    | 0.5835    | 0.4660    | 0.061      |
| H37B3 | 0.9652    | 0.5875    | 0.5259    | 0.061      |
| H37C3 | 0.8875    | 0.6021    | 0.4876    | 0.061      |
| N114  | 0.6193(3) | 0.5794(2) | 0.5279(2) | 0.0328(15) |
| C124  | 0.5752(4) | 0.5503(3) | 0.5612(2) | 0.0263(16) |
| N134  | 0.5463(4) | 0.5885(2) | 0.5977(2) | 0.0374(15) |
| C144  | 0.5001(4) | 0.5627(3) | 0.6319(3) | 0.0338(17) |
| C154  | 0.4681(4) | 0.6027(3) | 0.6709(3) | 0.0386(18) |
| H154  | 0.4782    | 0.6473    | 0.6722    | 0.046      |
| C164  | 0.4237(5) | 0.5775(3) | 0.7055(3) | 0.045(2)   |
| H164  | 0.4040    | 0.6049    | 0.7315    | 0.054      |
| C174  | 0.4052(4) | 0.5120(3) | 0.7047(3) | 0.0387(18) |
| C184  | 0.4376(4) | 0.4724(3) | 0.6699(3) | 0.0356(18) |
| H184  | 0.4285    | 0.4280    | 0.6710    | 0.043      |
| C194  | 0.4846(4) | 0.4951(3) | 0.6320(2) | 0.0304(17) |
| C204  | 0.5156(4) | 0.4569(3) | 0.5941(2) | 0.0317(17) |
| H204  | 0.5051    | 0.4123    | 0.5925    | 0.038      |
| C214  | 0.5624(4) | 0.4829(3) | 0.5583(3) | 0.0303(16) |
| C224  | 0.5961(4) | 0.4485(3) | 0.5191(2) | 0.0279(16) |
| H224  | 0.5880    | 0.4037    | 0.5161    | 0.034      |
| C234  | 0.6408(4) | 0.4766(3) | 0.4845(2) | 0.0281(16) |
| C244  | 0.6805(4) | 0.4408(3) | 0.4442(2) | 0.0340(17) |
| C254  | 0.6728(5) | 0.3752(3) | 0.4373(3) | 0.040(2)   |
| H254  | 0.6382    | 0.3529    | 0.4580    | 0.049      |
| C264  | 0.7139(5) | 0.3416(3) | 0.4014(3) | 0.050(2)   |
| H264  | 0.7071    | 0.2967    | 0.3969    | 0.060      |
| C274  | 0.7656(5) | 0.3739(3) | 0.3716(3) | 0.048(2)   |

## SUPPORTING INFORMATION

|       |           |            |           |            |
|-------|-----------|------------|-----------|------------|
| H274  | 0.7960    | 0.3511     | 0.3477    | 0.057      |
| C284  | 0.7725(5) | 0.4384(3)  | 0.3770(3) | 0.047(2)   |
| H284  | 0.8070    | 0.4599     | 0.3560    | 0.056      |
| C294  | 0.7300(4) | 0.4738(3)  | 0.4126(3) | 0.0330(17) |
| C304  | 0.7372(4) | 0.5440(3)  | 0.4178(2) | 0.0338(17) |
| C314  | 0.7820(4) | 0.5783(3)  | 0.3849(3) | 0.0423(19) |
| H314  | 0.8088    | 0.5559     | 0.3589    | 0.051      |
| C324  | 0.7881(5) | 0.6432(3)  | 0.3893(3) | 0.048(2)   |
| H324  | 0.8204    | 0.6654     | 0.3674    | 0.058      |
| C334  | 0.7465(5) | 0.6762(3)  | 0.4262(3) | 0.051(2)   |
| H334  | 0.7484    | 0.7211     | 0.4286    | 0.061      |
| C344  | 0.7025(5) | 0.6442(3)  | 0.4591(3) | 0.048(2)   |
| H344  | 0.6755    | 0.6673     | 0.4847    | 0.057      |
| C354  | 0.6970(4) | 0.5778(3)  | 0.4552(3) | 0.0350(18) |
| C364  | 0.6502(4) | 0.5448(3)  | 0.4910(2) | 0.0309(16) |
| O374  | 0.3564(3) | 0.4952(2)  | 0.7412(2) | 0.0507(15) |
| C374  | 0.3336(5) | 0.4299(3)  | 0.7425(3) | 0.047(2)   |
| H37A4 | 0.2947    | 0.4249     | 0.7685    | 0.071      |
| H37B4 | 0.3836    | 0.4068     | 0.7505    | 0.071      |
| H37C4 | 0.3066    | 0.4130     | 0.7092    | 0.071      |
| N115  | 0.3776(4) | 0.0768(2)  | 0.9483(2) | 0.0323(15) |
| C125  | 0.4498(4) | 0.0468(3)  | 0.9434(3) | 0.0297(17) |
| N135  | 0.5199(4) | 0.0857(2)  | 0.9452(2) | 0.0317(15) |
| C145  | 0.5919(4) | 0.0580(3)  | 0.9400(2) | 0.0276(16) |
| C155  | 0.6655(4) | 0.0992(3)  | 0.9412(3) | 0.042(2)   |
| H155  | 0.6621    | 0.1437     | 0.9469    | 0.050      |
| C165  | 0.7400(4) | 0.0739(3)  | 0.9340(3) | 0.041(2)   |
| H165  | 0.7882    | 0.1016     | 0.9342    | 0.049      |
| C175  | 0.7486(4) | 0.0081(3)  | 0.9264(3) | 0.0353(18) |
| C185  | 0.6807(4) | -0.0331(3) | 0.9245(3) | 0.0331(18) |
| H185  | 0.6862    | -0.0774    | 0.9189    | 0.040      |
| C195  | 0.6006(4) | -0.0079(3) | 0.9312(3) | 0.0292(17) |
| C205  | 0.5287(4) | -0.0474(3) | 0.9300(2) | 0.0305(17) |
| H205  | 0.5319    | -0.0920    | 0.9257    | 0.037      |
| C215  | 0.4507(4) | -0.0202(3) | 0.9351(3) | 0.0288(17) |
| C225  | 0.3749(4) | -0.0568(3) | 0.9339(2) | 0.0318(17) |
| H225  | 0.3744    | -0.1016    | 0.9289    | 0.038      |
| C235  | 0.3019(4) | -0.0271(3) | 0.9401(3) | 0.0326(17) |
| C245  | 0.2211(4) | -0.0620(3) | 0.9405(3) | 0.0326(18) |
| C255  | 0.2130(5) | -0.1275(3) | 0.9328(3) | 0.044(2)   |
| H255  | 0.2608    | -0.1504    | 0.9262    | 0.053      |
| C265  | 0.1376(5) | -0.1600(3) | 0.9346(3) | 0.049(2)   |
| H265  | 0.1337    | -0.2049    | 0.9298    | 0.059      |
| C275  | 0.0675(5) | -0.1269(4) | 0.9436(3) | 0.050(2)   |
| H275  | 0.0153    | -0.1490    | 0.9454    | 0.061      |
| C285  | 0.0737(5) | -0.0632(3) | 0.9496(3) | 0.043(2)   |
| H285  | 0.0249    | -0.0411    | 0.9554    | 0.052      |
| C295  | 0.1486(4) | -0.0282(3) | 0.9478(3) | 0.0357(18) |
| C305  | 0.1533(4) | 0.0413(3)  | 0.9524(3) | 0.0314(17) |
| C315  | 0.0825(5) | 0.0769(3)  | 0.9579(3) | 0.048(2)   |
| H315  | 0.0297    | 0.0556     | 0.9597    | 0.057      |
| C325  | 0.0881(5) | 0.1413(4)  | 0.9607(3) | 0.057(2)   |
| H325  | 0.0390    | 0.1641     | 0.9630    | 0.069      |
| C335  | 0.1631(5) | 0.1733(3)  | 0.9604(3) | 0.057(2)   |
| H335  | 0.1667    | 0.2183     | 0.9636    | 0.069      |
| C345  | 0.2335(5) | 0.1403(3)  | 0.9553(3) | 0.045(2)   |
| H345  | 0.2856    | 0.1628     | 0.9540    | 0.054      |
| C355  | 0.2304(4) | 0.0746(3)  | 0.9519(3) | 0.0323(17) |
| C365  | 0.3075(4) | 0.0411(3)  | 0.9471(3) | 0.0287(16) |
| O375  | 0.8272(3) | -0.0086(2) | 0.9192(2) | 0.0487(15) |
| C375  | 0.8388(5) | -0.0751(3) | 0.9084(3) | 0.050(2)   |
| H37A5 | 0.8969    | -0.0811    | 0.9015    | 0.075      |
| H37B5 | 0.8015    | -0.0917    | 0.8787    | 0.075      |
| H37C5 | 0.8261    | -0.0977    | 0.9378    | 0.075      |
| N116  | 0.4031(3) | -0.0794(2) | 0.8013(2) | 0.0338(14) |
| C126  | 0.3308(4) | -0.0494(3) | 0.8071(2) | 0.0336(17) |
| N136  | 0.2613(3) | -0.0886(2) | 0.8038(2) | 0.0353(14) |
| C146  | 0.1884(4) | -0.0613(3) | 0.8086(2) | 0.0341(17) |
| C156  | 0.1131(4) | -0.1012(3) | 0.8061(3) | 0.045(2)   |
| H156  | 0.1158    | -0.1458    | 0.8007    | 0.054      |
| C166  | 0.0386(5) | -0.0757(3) | 0.8116(3) | 0.048(2)   |
| H166  | -0.0105   | -0.1029    | 0.8091    | 0.058      |
| C176  | 0.0316(4) | -0.0100(3) | 0.8209(3) | 0.0410(18) |
| C186  | 0.1013(4) | 0.0305(3)  | 0.8248(3) | 0.0382(18) |
| H186  | 0.0964    | 0.0748     | 0.8315    | 0.046      |
| C196  | 0.1812(4) | 0.0056(3)  | 0.8189(2) | 0.0346(17) |
| C206  | 0.2545(4) | 0.0442(3)  | 0.8223(2) | 0.0331(17) |
| H206  | 0.2525    | 0.0888     | 0.8282    | 0.040      |
| C216  | 0.3303(4) | 0.0168(3)  | 0.8169(2) | 0.0288(16) |
| C226  | 0.4072(4) | 0.0532(3)  | 0.8190(2) | 0.0331(17) |
| H226  | 0.4084    | 0.0980     | 0.8251    | 0.040      |
| C236  | 0.4804(4) | 0.0229(3)  | 0.8120(3) | 0.0353(17) |
| C246  | 0.5617(4) | 0.0583(3)  | 0.8114(2) | 0.0341(17) |
| C256  | 0.5679(4) | 0.1243(3)  | 0.8194(3) | 0.044(2)   |
| H256  | 0.5200    | 0.1466     | 0.8271    | 0.052      |
| C266  | 0.6423(4) | 0.1572(3)  | 0.8164(3) | 0.049(2)   |
| H266  | 0.6460    | 0.2020     | 0.8224    | 0.059      |

## SUPPORTING INFORMATION

|       |            |            |           |            |
|-------|------------|------------|-----------|------------|
| C276  | 0.7122(4)  | 0.1252(3)  | 0.8047(3) | 0.054(2)   |
| H276  | 0.7634     | 0.1481     | 0.8016    | 0.065      |
| C286  | 0.7070(4)  | 0.0610(3)  | 0.7976(3) | 0.0468(19) |
| H286  | 0.7556     | 0.0396     | 0.7902    | 0.056      |
| C296  | 0.6325(4)  | 0.0247(3)  | 0.8009(3) | 0.0398(18) |
| C306  | 0.6270(4)  | -0.0441(3) | 0.7943(2) | 0.0365(17) |
| C316  | 0.6978(4)  | -0.0794(3) | 0.7859(2) | 0.0476(19) |
| H316  | 0.7503     | -0.0576    | 0.7844    | 0.057      |
| C326  | 0.6924(5)  | -0.1436(3) | 0.7800(3) | 0.058(2)   |
| H326  | 0.7410     | -0.1661    | 0.7747    | 0.070      |
| C336  | 0.6173(5)  | -0.1761(3) | 0.7816(3) | 0.056(2)   |
| H336  | 0.6141     | -0.2210    | 0.7769    | 0.068      |
| C346  | 0.5462(5)  | -0.1442(3) | 0.7900(3) | 0.045(2)   |
| H346  | 0.4946     | -0.1670    | 0.7920    | 0.054      |
| C356  | 0.5510(4)  | -0.0783(3) | 0.7955(2) | 0.0321(17) |
| C366  | 0.4745(4)  | -0.0447(3) | 0.8030(2) | 0.0317(16) |
| O376  | -0.0478(3) | 0.0070(2)  | 0.8265(2) | 0.0545(15) |
| C376  | -0.0588(4) | 0.0731(3)  | 0.8377(3) | 0.053(2)   |
| H37A6 | -0.1169    | 0.0793     | 0.8445    | 0.079      |
| H37B6 | -0.0453    | 0.0960     | 0.8087    | 0.079      |
| H37C6 | -0.0216    | 0.0891     | 0.8677    | 0.079      |
| N117  | 0.1630(3)  | 0.0847(2)  | 0.7024(2) | 0.0353(15) |
| C127  | 0.2346(4)  | 0.0542(3)  | 0.6967(2) | 0.0321(17) |
| N137  | 0.3048(3)  | 0.0917(2)  | 0.7007(2) | 0.0321(14) |
| C147  | 0.3769(4)  | 0.0639(3)  | 0.6943(2) | 0.0319(16) |
| C157  | 0.4524(4)  | 0.1029(3)  | 0.6970(3) | 0.0382(18) |
| H157  | 0.4506     | 0.1476     | 0.7030    | 0.046      |
| C167  | 0.5265(4)  | 0.0768(3)  | 0.6911(2) | 0.0400(18) |
| H167  | 0.5762     | 0.1033     | 0.6944    | 0.048      |
| C177  | 0.5315(4)  | 0.0105(3)  | 0.6800(3) | 0.0315(17) |
| C187  | 0.4615(4)  | -0.0288(3) | 0.6764(2) | 0.0357(17) |
| H187  | 0.4650     | -0.0732    | 0.6694    | 0.043      |
| C197  | 0.3826(4)  | -0.0026(3) | 0.6833(2) | 0.0297(16) |
| C207  | 0.3096(4)  | -0.0408(3) | 0.6799(2) | 0.0341(17) |
| H207  | 0.3111     | -0.0854    | 0.6734    | 0.041      |
| C217  | 0.2335(4)  | -0.0126(3) | 0.6862(2) | 0.0305(16) |
| C227  | 0.1569(4)  | -0.0475(3) | 0.6826(2) | 0.0341(17) |
| H227  | 0.1551     | -0.0923    | 0.6763    | 0.041      |
| C237  | 0.0841(4)  | -0.0169(3) | 0.6883(2) | 0.0307(16) |
| C247  | 0.0016(4)  | -0.0514(3) | 0.6850(3) | 0.0356(17) |
| C257  | -0.0070(4) | -0.1165(3) | 0.6744(3) | 0.046(2)   |
| H257  | 0.0410     | -0.1395    | 0.6684    | 0.055      |
| C267  | -0.0843(5) | -0.1489(3) | 0.6722(3) | 0.058(2)   |
| H267  | -0.0891    | -0.1935    | 0.6646    | 0.069      |
| C277  | -0.1542(5) | -0.1159(3) | 0.6812(3) | 0.055(2)   |
| H277  | -0.2069    | -0.1380    | 0.6812    | 0.066      |
| C287  | -0.1476(5) | -0.0515(3) | 0.6902(3) | 0.051(2)   |
| H287  | -0.1964    | -0.0294    | 0.6958    | 0.061      |
| C297  | -0.0703(4) | -0.0169(3) | 0.6914(2) | 0.0387(17) |
| C307  | -0.0642(4) | 0.0521(3)  | 0.6997(3) | 0.0393(18) |
| C317  | -0.1339(4) | 0.0889(3)  | 0.7035(3) | 0.050(2)   |
| H317  | -0.1878    | 0.0681     | 0.7004    | 0.060      |
| C327  | -0.1279(5) | 0.1527(4)  | 0.7115(3) | 0.062(3)   |
| H327  | -0.1767    | 0.1759     | 0.7141    | 0.074      |
| C337  | -0.0500(5) | 0.1839(3)  | 0.7159(3) | 0.062(2)   |
| H337  | -0.0448    | 0.2287     | 0.7219    | 0.075      |
| C347  | 0.0193(4)  | 0.1504(3)  | 0.7115(3) | 0.052(2)   |
| H347  | 0.0724     | 0.1724     | 0.7140    | 0.062      |
| C357  | 0.0143(4)  | 0.0845(3)  | 0.7035(2) | 0.0375(17) |
| C367  | 0.0917(4)  | 0.0501(3)  | 0.6984(3) | 0.0346(17) |
| O377  | 0.6098(3)  | -0.0082(2) | 0.6738(2) | 0.0469(13) |
| C377  | 0.6160(4)  | -0.0742(3) | 0.6583(3) | 0.048(2)   |
| H37A7 | 0.6743     | -0.0825    | 0.6532    | 0.073      |
| H37B7 | 0.5810     | -0.0854    | 0.6265    | 0.073      |
| H37C7 | 0.5971     | -0.0997    | 0.6847    | 0.073      |
| N118  | 0.1200(3)  | -0.0803(2) | 0.5515(2) | 0.0286(14) |
| C128  | 0.0471(4)  | -0.0503(3) | 0.5558(3) | 0.0262(16) |
| N138  | -0.0230(3) | -0.0882(2) | 0.5502(2) | 0.0312(15) |
| C148  | -0.0948(4) | -0.0600(3) | 0.5548(2) | 0.0259(16) |
| C158  | -0.1714(4) | -0.0999(3) | 0.5487(3) | 0.0339(18) |
| H158  | -0.1694    | -0.1444    | 0.5412    | 0.041      |
| C168  | -0.2456(4) | -0.0738(3) | 0.5538(3) | 0.0372(19) |
| H168  | -0.2951    | -0.1006    | 0.5496    | 0.045      |
| C178  | -0.2521(4) | -0.0083(3) | 0.5650(3) | 0.0323(17) |
| C188  | -0.1822(4) | 0.0312(3)  | 0.5715(3) | 0.0319(18) |
| H188  | -0.1865    | 0.0753     | 0.5795    | 0.038      |
| C198  | -0.1023(4) | 0.0059(3)  | 0.5663(3) | 0.0276(17) |
| C208  | -0.0298(4) | 0.0442(3)  | 0.5713(3) | 0.0297(17) |
| H208  | -0.0320    | 0.0887     | 0.5777    | 0.036      |
| C218  | 0.0474(4)  | 0.0166(3)  | 0.5670(3) | 0.0263(16) |
| C228  | 0.1245(4)  | 0.0522(3)  | 0.5712(3) | 0.0320(18) |
| H228  | 0.1257     | 0.0969     | 0.5780    | 0.038      |
| C238  | 0.1976(4)  | 0.0228(3)  | 0.5655(3) | 0.0307(17) |
| C248  | 0.2785(4)  | 0.0572(3)  | 0.5663(3) | 0.0320(17) |
| C258  | 0.2873(4)  | 0.1225(3)  | 0.5758(3) | 0.0369(19) |
| H258  | 0.2401     | 0.1452     | 0.5840    | 0.044      |
| C268  | 0.3620(4)  | 0.1551(3)  | 0.5735(3) | 0.041(2)   |

## SUPPORTING INFORMATION

|       |            |             |            |            |
|-------|------------|-------------|------------|------------|
| H268  | 0.3659     | 0.1999      | 0.5799     | 0.049      |
| C278  | 0.4320(5)  | 0.1232(3)   | 0.5618(3)  | 0.043(2)   |
| H278  | 0.4835     | 0.1458      | 0.5591     | 0.052      |
| C288  | 0.4256(4)  | 0.0591(3)   | 0.5542(3)  | 0.039(2)   |
| H288  | 0.4737     | 0.0373      | 0.5463     | 0.047      |
| C298  | 0.3507(4)  | 0.0236(3)   | 0.5576(3)  | 0.0339(18) |
| C308  | 0.3458(4)  | -0.0458(3)  | 0.5515(3)  | 0.0307(17) |
| C318  | 0.4164(5)  | -0.0813(3)  | 0.5469(3)  | 0.045(2)   |
| H318  | 0.4695     | -0.0597     | 0.5466     | 0.055      |
| C328  | 0.4112(5)  | -0.1453(4)  | 0.5429(3)  | 0.053(2)   |
| H328  | 0.4604     | -0.1681     | 0.5405     | 0.064      |
| C338  | 0.3357(5)  | -0.1773(3)  | 0.5422(3)  | 0.054(2)   |
| H338  | 0.3325     | -0.2223     | 0.5386     | 0.065      |
| C348  | 0.2640(5)  | -0.1452(3)  | 0.5467(3)  | 0.043(2)   |
| H348  | 0.2118     | -0.1679     | 0.5468     | 0.051      |
| C358  | 0.2680(4)  | -0.0795(3)  | 0.5512(3)  | 0.0296(17) |
| C368  | 0.1917(4)  | -0.0449(3)  | 0.5558(2)  | 0.0280(16) |
| O378  | -0.3307(3) | 0.0107(2)   | 0.5687(2)  | 0.0406(14) |
| C378  | -0.3384(5) | 0.0764(3)   | 0.5840(3)  | 0.047(2)   |
| H37A8 | -0.3971    | 0.0842      | 0.5882     | 0.070      |
| H37B8 | -0.3186    | 0.1021      | 0.5580     | 0.070      |
| H37C8 | -0.3047    | 0.0879      | 0.6163     | 0.070      |
| C41   | 0.3090(7)  | -0.2189(6)  | 0.7469(5)  | 0.108(6)   |
| H41   | 0.3110     | -0.1761     | 0.7661     | 0.130      |
| C11   | 0.3571(4)  | -0.2704(2)  | 0.7849(2)  | 0.136(2)   |
| C12   | 0.2061(5)  | -0.2447(4)  | 0.7322(4)  | 0.283(7)   |
| C13   | 0.3665(4)  | -0.2140(2)  | 0.6948(2)  | 0.128(2)   |
| C41B  | 0.2739(18) | -0.2143(15) | 0.7559(10) | 0.147(16)  |
| H41B  | 0.2926     | -0.1715     | 0.7728     | 0.176      |
| C131  | 0.3532(12) | -0.2647(8)  | 0.7462(8)  | 0.239(12)  |
| C132  | 0.2143(10) | -0.2138(5)  | 0.6985(5)  | 0.088(4)   |
| C133  | 0.2145(15) | -0.2611(6)  | 0.7918(6)  | 0.227(10)  |
| C42   | 1.0339(6)  | -0.2220(6)  | 0.4980(4)  | 0.070(4)   |
| H42   | 1.0320     | -0.1779     | 0.5143     | 0.084      |
| C14   | 0.9315(3)  | -0.2501(3)  | 0.4788(3)  | 0.165(3)   |
| C15   | 1.0801(4)  | -0.2679(2)  | 0.5429(2)  | 0.102(2)   |
| C16   | 1.0944(3)  | -0.2190(2)  | 0.4476(1)  | 0.1063(18) |
| C42B  | 1.0056(17) | -0.2260(18) | 0.5102(12) | 0.120(16)  |
| H42B  | 1.0225     | -0.1827     | 0.5267     | 0.143      |
| C134  | 0.9590(14) | -0.2223(6)  | 0.4489(7)  | 0.151(9)   |
| C135  | 1.0872(14) | -0.2745(11) | 0.5140(11) | 0.219(13)  |
| C136  | 0.9264(11) | -0.2606(6)  | 0.5401(7)  | 0.137(7)   |
| C43   | 0.8544(11) | 0.2848(12)  | 0.8964(6)  | 0.116(9)   |
| H43   | 0.8774     | 0.3293      | 0.9058     | 0.139      |
| C17   | 0.8678(11) | 0.2637(6)   | 0.8341(4)  | 0.287(10)  |
| C18   | 0.9019(8)  | 0.2361(5)   | 0.9360(5)  | 0.257(7)   |
| C19   | 0.7500(4)  | 0.2806(3)   | 0.9039(3)  | 0.133(3)   |
| C43B  | 0.8857(16) | 0.2756(14)  | 0.8926(9)  | 0.117(10)  |
| H43B  | 0.9071     | 0.3185      | 0.9080     | 0.140      |
| C137  | 0.8091(9)  | 0.2849(4)   | 0.8444(8)  | 0.267(11)  |
| C138  | 0.8659(8)  | 0.2301(4)   | 0.9400(4)  | 0.150(5)   |
| C139  | 0.9646(8)  | 0.2406(4)   | 0.8623(4)  | 0.156(5)   |
| C44   | 0.4640(7)  | 0.2213(6)   | 0.9969(5)  | 0.076(5)   |
| H44   | 0.4647     | 0.1771      | 0.9808     | 0.091      |
| C110  | 0.5668(4)  | 0.2519(3)   | 1.0098(4)  | 0.172(4)   |
| C111  | 0.4104(6)  | 0.2642(4)   | 0.9567(4)  | 0.193(4)   |
| C112  | 0.4108(4)  | 0.2200(2)   | 1.0488(2)  | 0.119(2)   |
| C44B  | 0.4918(14) | 0.2302(17)  | 0.9775(10) | 0.104(13)  |
| H44B  | 0.4816     | 0.1852      | 0.9629     | 0.125      |
| C140  | 0.5320(11) | 0.2261(5)   | 1.0405(5)  | 0.144(6)   |
| C141  | 0.4096(8)  | 0.2698(5)   | 0.9524(3)  | 0.051(3)   |
| C142  | 0.5779(7)  | 0.2589(4)   | 0.9500(5)  | 0.103(4)   |
| C45   | 0.2723(6)  | 0.2309(5)   | 0.7438(3)  | 0.058(3)   |
| H45   | 0.2512     | 0.1884      | 0.7273     | 0.069      |
| C113  | 0.3219(3)  | 0.2201(2)   | 0.8040(2)  | 0.0819(14) |
| C114  | 0.3443(3)  | 0.2621(2)   | 0.7060(2)  | 0.1139(17) |
| C115  | 0.1873(3)  | 0.2783(2)   | 0.7478(2)  | 0.108(2)   |
| C45B  | 0.2452(14) | 0.2187(13)  | 0.7631(10) | 0.050(9)   |
| H45B  | 0.2461     | 0.1763      | 0.7437     | 0.060      |
| C143  | 0.3467(10) | 0.2461(9)   | 0.7780(9)  | 0.211(10)  |
| C144  | 0.1759(8)  | 0.2121(5)   | 0.8070(4)  | 0.104(5)   |
| C145  | 0.2109(13) | 0.2705(8)   | 0.7210(7)  | 0.156(7)   |
| C46   | 0.6263(8)  | 0.2818(6)   | 0.6331(4)  | 0.088(5)   |
| H46   | 0.6515     | 0.3259      | 0.6407     | 0.105      |
| C116  | 0.5194(3)  | 0.2791(2)   | 0.6378(2)  | 0.113(2)   |
| C117  | 0.6607(7)  | 0.2344(4)   | 0.6769(4)  | 0.229(5)   |
| C118  | 0.6436(6)  | 0.2514(3)   | 0.5731(2)  | 0.195(5)   |
| C46B  | 0.653(2)   | 0.271(2)    | 0.6367(10) | 0.100(14)  |
| H46B  | 0.6706     | 0.3161      | 0.6491     | 0.120      |
| C146  | 0.5722(13) | 0.2773(7)   | 0.5890(9)  | 0.194(11)  |
| C147  | 0.6636(6)  | 0.2304(5)   | 0.6899(5)  | 0.049(3)   |
| C148  | 0.7351(10) | 0.2430(5)   | 0.6056(5)  | 0.110(5)   |
| C47   | 0.6604(9)  | 0.7192(8)   | 0.5983(4)  | 0.093(6)   |
| H47   | 0.6351     | 0.6752      | 0.5901     | 0.112      |
| C119  | 0.6421(6)  | 0.7462(3)   | 0.6608(2)  | 0.170(4)   |
| C120  | 0.6156(6)  | 0.7682(4)   | 0.5565(4)  | 0.184(4)   |
| C121  | 0.7663(3)  | 0.7187(2)   | 0.5941(2)  | 0.0970(19) |

## SUPPORTING INFORMATION

|      |            |            |           |           |
|------|------------|------------|-----------|-----------|
| C47B | 0.6247(18) | 0.7272(15) | 0.6017(9) | 0.104(13) |
| H47B | 0.6040     | 0.6830     | 0.5894    | 0.125     |
| C149 | 0.5516(13) | 0.7605(6)  | 0.6398(5) | 0.137(7)  |
| C150 | 0.6292(9)  | 0.7703(4)  | 0.5499(4) | 0.055(4)  |
| C151 | 0.7152(13) | 0.7235(6)  | 0.6418(9) | 0.188(11) |
| C48  | 0.8567(9)  | 0.7301(9)  | 0.8772(6) | 0.075(7)  |
| H48  | 0.8424     | 0.6879     | 0.8580    | 0.091     |
| C122 | 0.9026(5)  | 0.7796(3)  | 0.8375(3) | 0.109(3)  |
| C123 | 0.9238(8)  | 0.7199(5)  | 0.9307(4) | 0.098(4)  |
| C124 | 0.7667(4)  | 0.7617(2)  | 0.8950(3) | 0.107(2)  |
| C48B | 0.8983(15) | 0.7152(10) | 0.8734(8) | 0.099(9)  |
| H48B | 0.8742     | 0.6711     | 0.8639    | 0.119     |
| C152 | 0.8487(10) | 0.7687(6)  | 0.8363(6) | 0.245(8)  |
| C153 | 0.8943(11) | 0.7362(6)  | 0.9370(5) | 0.173(7)  |
| C154 | 1.0020(5)  | 0.7216(3)  | 0.8621(3) | 0.143(4)  |

**Table S24:** Hydrogen coordinates and isotropic displacement parameters ( $\text{\AA}^2$ ) for **5e**.

| Atom  | x      | y      | z      | $U_{\text{eq}}$ |
|-------|--------|--------|--------|-----------------|
| H151  | 1.0262 | 0.3592 | 0.8248 | 0.051           |
| H161  | 1.1012 | 0.4030 | 0.7662 | 0.055           |
| H181  | 1.0791 | 0.5788 | 0.8312 | 0.046           |
| H201  | 1.0002 | 0.5915 | 0.9088 | 0.034           |
| H221  | 0.9159 | 0.5981 | 0.9850 | 0.032           |
| H251  | 0.8658 | 0.6472 | 1.0437 | 0.049           |
| H261  | 0.7929 | 0.7025 | 1.1037 | 0.060           |
| H271  | 0.7034 | 0.6462 | 1.1515 | 0.061           |
| H281  | 0.6897 | 0.5378 | 1.1398 | 0.057           |
| H311  | 0.6918 | 0.4419 | 1.1376 | 0.054           |
| H321  | 0.6797 | 0.3327 | 1.1267 | 0.060           |
| H331  | 0.7483 | 0.2774 | 1.0634 | 0.068           |
| H341  | 0.8234 | 0.3338 | 1.0090 | 0.056           |
| H37A1 | 1.2088 | 0.5849 | 0.7323 | 0.080           |
| H37B1 | 1.2050 | 0.5927 | 0.7926 | 0.080           |
| H37C1 | 1.1237 | 0.6030 | 0.7556 | 0.080           |
| H152  | 0.7133 | 0.6470 | 0.9466 | 0.044           |
| H162  | 0.6395 | 0.6022 | 1.0053 | 0.045           |
| H182  | 0.6554 | 0.4272 | 0.9365 | 0.037           |
| H202  | 0.7358 | 0.4151 | 0.8599 | 0.037           |
| H222  | 0.8170 | 0.4089 | 0.7825 | 0.035           |
| H252  | 0.8656 | 0.3599 | 0.7233 | 0.051           |
| H262  | 0.9274 | 0.3069 | 0.6593 | 0.061           |
| H272  | 1.0130 | 0.3619 | 0.6084 | 0.062           |
| H282  | 1.0299 | 0.4713 | 0.6217 | 0.057           |
| H312  | 1.0276 | 0.5664 | 0.6250 | 0.057           |
| H322  | 1.0471 | 0.6750 | 0.6395 | 0.069           |
| H332  | 0.9880 | 0.7303 | 0.7066 | 0.072           |
| H342  | 0.9174 | 0.6728 | 0.7629 | 0.061           |
| H37A2 | 0.5272 | 0.4164 | 1.0329 | 0.066           |
| H37B2 | 0.6133 | 0.3990 | 1.0106 | 0.066           |
| H37C2 | 0.5348 | 0.4138 | 0.9730 | 0.066           |
| H153  | 0.7862 | 0.3569 | 0.5554 | 0.040           |
| H163  | 0.8595 | 0.3998 | 0.4953 | 0.044           |
| H183  | 0.8462 | 0.5756 | 0.5633 | 0.038           |
| H203  | 0.7672 | 0.5899 | 0.6401 | 0.036           |
| H223  | 0.6839 | 0.5974 | 0.7170 | 0.030           |
| H253  | 0.6326 | 0.6476 | 0.7751 | 0.046           |
| H263  | 0.5709 | 0.7018 | 0.8395 | 0.058           |
| H273  | 0.4845 | 0.6472 | 0.8899 | 0.060           |
| H283  | 0.4719 | 0.5380 | 0.8794 | 0.054           |
| H313  | 0.4752 | 0.4431 | 0.8779 | 0.052           |
| H323  | 0.4632 | 0.3338 | 0.8679 | 0.065           |
| H333  | 0.5267 | 0.2787 | 0.8027 | 0.069           |
| H343  | 0.5952 | 0.3336 | 0.7448 | 0.054           |
| H37A3 | 0.9738 | 0.5835 | 0.4660 | 0.061           |
| H37B3 | 0.9652 | 0.5875 | 0.5259 | 0.061           |
| H37C3 | 0.8875 | 0.6021 | 0.4876 | 0.061           |
| H154  | 0.4782 | 0.6473 | 0.6722 | 0.046           |
| H164  | 0.4040 | 0.6049 | 0.7315 | 0.054           |
| H184  | 0.4285 | 0.4280 | 0.6710 | 0.043           |
| H204  | 0.5051 | 0.4123 | 0.5925 | 0.038           |
| H224  | 0.5880 | 0.4037 | 0.5161 | 0.034           |
| H254  | 0.6382 | 0.3529 | 0.4580 | 0.049           |
| H264  | 0.7071 | 0.2967 | 0.3969 | 0.060           |
| H274  | 0.7960 | 0.3511 | 0.3477 | 0.057           |
| H284  | 0.8070 | 0.4599 | 0.3560 | 0.056           |
| H314  | 0.8088 | 0.5559 | 0.3589 | 0.051           |
| H324  | 0.8204 | 0.6654 | 0.3674 | 0.058           |
| H334  | 0.7484 | 0.7211 | 0.4286 | 0.061           |
| H344  | 0.6755 | 0.6673 | 0.4847 | 0.057           |
| H37A4 | 0.2947 | 0.4249 | 0.7685 | 0.071           |



## SUPPORTING INFORMATION

---

|       |         |         |        |       |
|-------|---------|---------|--------|-------|
| H37B4 | 0.3836  | 0.4068  | 0.7505 | 0.071 |
| H37C4 | 0.3066  | 0.4130  | 0.7092 | 0.071 |
| H155  | 0.6621  | 0.1437  | 0.9469 | 0.050 |
| H165  | 0.7882  | 0.1016  | 0.9342 | 0.049 |
| H185  | 0.6862  | -0.0774 | 0.9189 | 0.040 |
| H205  | 0.5319  | -0.0920 | 0.9257 | 0.037 |
| H225  | 0.3744  | -0.1016 | 0.9289 | 0.038 |
| H255  | 0.2608  | -0.1504 | 0.9262 | 0.053 |
| H265  | 0.1337  | -0.2049 | 0.9298 | 0.059 |
| H275  | 0.0153  | -0.1490 | 0.9454 | 0.061 |
| H285  | 0.0249  | -0.0411 | 0.9554 | 0.052 |
| H315  | 0.0297  | 0.0556  | 0.9597 | 0.057 |
| H325  | 0.0390  | 0.1641  | 0.9630 | 0.069 |
| H335  | 0.1667  | 0.2183  | 0.9636 | 0.069 |
| H345  | 0.2856  | 0.1628  | 0.9540 | 0.054 |
| H37A5 | 0.8969  | -0.0811 | 0.9015 | 0.075 |
| H37B5 | 0.8015  | -0.0917 | 0.8787 | 0.075 |
| H37C5 | 0.8261  | -0.0977 | 0.9378 | 0.075 |
| H156  | 0.1158  | -0.1458 | 0.8007 | 0.054 |
| H166  | -0.0105 | -0.1029 | 0.8091 | 0.058 |
| H186  | 0.0964  | 0.0748  | 0.8315 | 0.046 |
| H206  | 0.2525  | 0.0888  | 0.8282 | 0.040 |
| H226  | 0.4084  | 0.0980  | 0.8251 | 0.040 |
| H256  | 0.5200  | 0.1466  | 0.8271 | 0.052 |
| H266  | 0.6460  | 0.2020  | 0.8224 | 0.059 |
| H276  | 0.7634  | 0.1481  | 0.8016 | 0.065 |
| H286  | 0.7556  | 0.0396  | 0.7902 | 0.056 |
| H316  | 0.7503  | -0.0576 | 0.7844 | 0.057 |
| H326  | 0.7410  | -0.1661 | 0.7747 | 0.070 |
| H336  | 0.6141  | -0.2210 | 0.7769 | 0.068 |
| H346  | 0.4946  | -0.1670 | 0.7920 | 0.054 |
| H37A6 | -0.1169 | 0.0793  | 0.8445 | 0.079 |
| H37B6 | -0.0453 | 0.0960  | 0.8087 | 0.079 |
| H37C6 | -0.0216 | 0.0891  | 0.8677 | 0.079 |
| H157  | 0.4506  | 0.1476  | 0.7030 | 0.046 |
| H167  | 0.5762  | 0.1033  | 0.6944 | 0.048 |
| H187  | 0.4650  | -0.0732 | 0.6694 | 0.043 |
| H207  | 0.3111  | -0.0854 | 0.6734 | 0.041 |
| H227  | 0.1551  | -0.0923 | 0.6763 | 0.041 |
| H257  | 0.0410  | -0.1395 | 0.6684 | 0.055 |
| H267  | -0.0891 | -0.1935 | 0.6646 | 0.069 |
| H277  | -0.2069 | -0.1380 | 0.6812 | 0.066 |
| H287  | -0.1964 | -0.0294 | 0.6958 | 0.061 |
| H317  | -0.1878 | 0.0681  | 0.7004 | 0.060 |
| H327  | -0.1767 | 0.1759  | 0.7141 | 0.074 |
| H337  | -0.0448 | 0.2287  | 0.7219 | 0.075 |
| H347  | 0.0724  | 0.1724  | 0.7140 | 0.062 |
| H37A7 | 0.6743  | -0.0825 | 0.6532 | 0.073 |
| H37B7 | 0.5810  | -0.0854 | 0.6265 | 0.073 |
| H37C7 | 0.5971  | -0.0997 | 0.6847 | 0.073 |
| H158  | -0.1694 | -0.1444 | 0.5412 | 0.041 |
| H168  | -0.2951 | -0.1006 | 0.5496 | 0.045 |
| H188  | -0.1865 | 0.0753  | 0.5795 | 0.038 |
| H208  | -0.0320 | 0.0887  | 0.5777 | 0.036 |
| H228  | 0.1257  | 0.0969  | 0.5780 | 0.038 |
| H258  | 0.2401  | 0.1452  | 0.5840 | 0.044 |
| H268  | 0.3659  | 0.1999  | 0.5799 | 0.049 |
| H278  | 0.4835  | 0.1458  | 0.5591 | 0.052 |
| H288  | 0.4737  | 0.0373  | 0.5463 | 0.047 |
| H318  | 0.4695  | -0.0597 | 0.5466 | 0.055 |
| H328  | 0.4604  | -0.1681 | 0.5405 | 0.064 |
| H338  | 0.3325  | -0.2223 | 0.5386 | 0.065 |
| H348  | 0.2118  | -0.1679 | 0.5468 | 0.051 |
| H37A8 | -0.3971 | 0.0842  | 0.5882 | 0.070 |
| H37B8 | -0.3186 | 0.1021  | 0.5580 | 0.070 |
| H37C8 | -0.3047 | 0.0879  | 0.6163 | 0.070 |
| H41   | 0.3110  | -0.1761 | 0.7661 | 0.130 |
| H41B  | 0.2926  | -0.1715 | 0.7728 | 0.176 |
| H42   | 1.0320  | -0.1779 | 0.5143 | 0.084 |
| H42B  | 1.0225  | -0.1827 | 0.5267 | 0.143 |
| H43   | 0.8774  | 0.3293  | 0.9058 | 0.139 |
| H43B  | 0.9071  | 0.3185  | 0.9080 | 0.140 |
| H44   | 0.4647  | 0.1771  | 0.9808 | 0.091 |
| H44B  | 0.4816  | 0.1852  | 0.9629 | 0.125 |
| H45   | 0.2512  | 0.1884  | 0.7273 | 0.069 |
| H45B  | 0.2461  | 0.1763  | 0.7437 | 0.060 |
| H46   | 0.6515  | 0.3259  | 0.6407 | 0.105 |
| H46B  | 0.6706  | 0.3161  | 0.6491 | 0.120 |
| H47   | 0.6351  | 0.6752  | 0.5901 | 0.112 |
| H47B  | 0.6040  | 0.6830  | 0.5894 | 0.125 |
| H48   | 0.8424  | 0.6879  | 0.8580 | 0.091 |
| H48B  | 0.8742  | 0.6711  | 0.8639 | 0.119 |

---



## SUPPORTING INFORMATION

**Table S25:** Anisotropic displacement parameters ( $\text{\AA}^2$ ) for **5e**. The anisotropic displacement factor exponent takes the form:  $-2\pi^2(h^2 a^2 U_{11} + \dots + 2 h k a' a' b' U_{12})$ 

| Atom | $U_{11}$ | $U_{22}$ | $U_{33}$ | $U_{23}$  | $U_{13}$  | $U_{12}$  |
|------|----------|----------|----------|-----------|-----------|-----------|
| N111 | 0.017(3) | 0.036(3) | 0.041(4) | 0.005(3)  | -0.006(3) | -0.004(3) |
| C121 | 0.017(4) | 0.035(4) | 0.030(4) | 0.002(3)  | -0.009(3) | 0.000(3)  |
| N131 | 0.034(4) | 0.035(3) | 0.038(4) | -0.001(3) | 0.003(3)  | -0.002(3) |
| C141 | 0.026(4) | 0.033(4) | 0.039(4) | 0.004(3)  | -0.001(3) | 0.002(3)  |
| C151 | 0.036(5) | 0.044(4) | 0.046(5) | -0.004(3) | 0.003(4)  | 0.006(4)  |
| C161 | 0.037(5) | 0.058(5) | 0.043(5) | -0.002(4) | 0.011(4)  | 0.012(4)  |
| C171 | 0.031(5) | 0.066(5) | 0.033(4) | 0.008(4)  | 0.005(3)  | 0.007(4)  |
| C181 | 0.027(5) | 0.048(5) | 0.040(5) | 0.010(3)  | -0.004(3) | 0.004(4)  |
| C191 | 0.015(4) | 0.035(4) | 0.035(4) | 0.000(3)  | -0.007(3) | 0.001(3)  |
| C201 | 0.022(4) | 0.032(4) | 0.032(4) | 0.005(3)  | -0.005(3) | 0.004(3)  |
| C211 | 0.019(4) | 0.032(4) | 0.037(4) | 0.002(3)  | -0.004(3) | -0.001(3) |
| C221 | 0.018(4) | 0.022(4) | 0.037(4) | 0.002(3)  | -0.007(3) | 0.000(3)  |
| C231 | 0.024(4) | 0.033(4) | 0.027(4) | 0.007(3)  | -0.007(3) | 0.000(3)  |
| C241 | 0.039(5) | 0.041(4) | 0.018(4) | 0.003(3)  | -0.006(3) | 0.004(3)  |
| C251 | 0.041(5) | 0.042(4) | 0.040(5) | -0.002(4) | 0.004(4)  | 0.000(4)  |
| C261 | 0.062(6) | 0.042(5) | 0.046(5) | -0.005(4) | 0.010(4)  | 0.007(4)  |
| C271 | 0.053(6) | 0.059(5) | 0.038(5) | -0.009(4) | 0.006(4)  | 0.004(4)  |
| C281 | 0.044(5) | 0.060(4) | 0.038(5) | -0.005(4) | 0.012(4)  | -0.008(4) |
| C291 | 0.025(4) | 0.048(4) | 0.029(4) | 0.008(3)  | -0.007(3) | 0.002(3)  |
| C301 | 0.023(4) | 0.045(4) | 0.035(4) | 0.006(3)  | -0.006(3) | -0.004(3) |
| C311 | 0.039(5) | 0.057(4) | 0.039(5) | 0.013(4)  | 0.000(4)  | 0.001(4)  |
| C321 | 0.048(5) | 0.057(5) | 0.047(5) | 0.021(4)  | 0.003(4)  | -0.008(4) |
| C331 | 0.046(6) | 0.049(5) | 0.078(7) | 0.019(4)  | 0.009(5)  | -0.008(4) |
| C341 | 0.033(5) | 0.034(4) | 0.074(6) | 0.008(4)  | 0.013(4)  | -0.003(4) |
| C351 | 0.029(5) | 0.042(4) | 0.042(5) | 0.014(3)  | 0.002(3)  | -0.004(3) |
| C361 | 0.025(4) | 0.028(4) | 0.031(4) | 0.005(3)  | -0.007(3) | -0.004(3) |
| O371 | 0.047(4) | 0.066(4) | 0.044(3) | -0.001(3) | 0.018(3)  | 0.000(3)  |
| C371 | 0.051(6) | 0.073(5) | 0.035(5) | 0.007(4)  | 0.006(4)  | -0.010(4) |
| N112 | 0.030(4) | 0.035(3) | 0.027(3) | 0.005(3)  | -0.009(3) | 0.001(3)  |
| C122 | 0.026(4) | 0.029(4) | 0.032(4) | 0.002(3)  | -0.009(3) | -0.002(3) |
| N132 | 0.037(4) | 0.036(3) | 0.030(3) | 0.004(3)  | -0.002(3) | 0.000(3)  |
| C142 | 0.023(4) | 0.036(4) | 0.031(4) | 0.003(3)  | -0.001(3) | 0.003(3)  |
| C152 | 0.027(4) | 0.042(4) | 0.040(4) | -0.003(3) | -0.004(3) | 0.010(3)  |
| C162 | 0.034(5) | 0.043(4) | 0.033(4) | -0.007(3) | -0.003(3) | 0.010(3)  |
| C172 | 0.027(4) | 0.049(4) | 0.032(4) | 0.003(3)  | 0.003(3)  | 0.008(3)  |
| C182 | 0.024(4) | 0.037(4) | 0.031(4) | 0.005(3)  | -0.008(3) | 0.001(3)  |
| C192 | 0.026(4) | 0.032(4) | 0.024(4) | 0.000(3)  | -0.007(3) | 0.002(3)  |
| C202 | 0.027(4) | 0.027(4) | 0.038(4) | 0.007(3)  | 0.002(3)  | 0.005(3)  |
| C212 | 0.013(4) | 0.030(4) | 0.031(4) | -0.001(3) | -0.005(3) | 0.001(3)  |
| C222 | 0.032(4) | 0.022(4) | 0.032(4) | -0.002(3) | -0.003(3) | 0.005(3)  |
| C232 | 0.032(4) | 0.030(4) | 0.030(4) | 0.005(3)  | -0.004(3) | 0.002(3)  |
| C242 | 0.027(4) | 0.044(4) | 0.029(4) | 0.006(3)  | -0.003(3) | 0.006(3)  |
| C252 | 0.052(5) | 0.045(4) | 0.030(4) | 0.002(3)  | 0.003(4)  | 0.004(4)  |
| C262 | 0.061(6) | 0.053(5) | 0.040(5) | 0.003(4)  | 0.006(4)  | 0.012(4)  |
| C272 | 0.059(6) | 0.065(5) | 0.030(5) | -0.002(4) | 0.009(4)  | 0.010(4)  |
| C282 | 0.046(5) | 0.065(5) | 0.033(5) | 0.009(4)  | 0.007(4)  | 0.001(4)  |
| C292 | 0.037(5) | 0.052(4) | 0.022(4) | 0.007(3)  | -0.003(3) | 0.000(3)  |
| C302 | 0.031(5) | 0.054(4) | 0.030(4) | 0.003(3)  | -0.008(3) | -0.005(3) |
| C312 | 0.039(5) | 0.061(5) | 0.043(5) | 0.012(4)  | 0.001(4)  | 0.001(4)  |
| C322 | 0.055(6) | 0.057(5) | 0.063(6) | 0.027(4)  | 0.005(4)  | -0.002(4) |
| C332 | 0.051(6) | 0.055(5) | 0.077(6) | 0.024(4)  | 0.007(4)  | -0.003(4) |
| C342 | 0.058(6) | 0.041(4) | 0.054(5) | 0.008(4)  | 0.011(4)  | -0.002(4) |
| C352 | 0.035(5) | 0.043(4) | 0.037(4) | 0.005(3)  | 0.000(3)  | -0.003(3) |
| C362 | 0.020(4) | 0.034(4) | 0.036(4) | 0.001(3)  | -0.008(3) | -0.005(3) |
| O372 | 0.033(3) | 0.052(3) | 0.035(3) | 0.001(2)  | 0.006(2)  | 0.001(2)  |
| C372 | 0.041(5) | 0.053(4) | 0.040(5) | 0.008(4)  | 0.011(4)  | -0.001(4) |
| N113 | 0.031(4) | 0.032(3) | 0.024(3) | 0.004(2)  | -0.003(3) | 0.002(3)  |
| C123 | 0.018(4) | 0.024(3) | 0.028(4) | 0.000(3)  | -0.005(3) | 0.001(3)  |
| N133 | 0.035(4) | 0.031(3) | 0.031(3) | 0.004(3)  | 0.001(3)  | 0.000(3)  |
| C143 | 0.028(4) | 0.029(4) | 0.035(4) | 0.000(3)  | 0.003(3)  | 0.000(3)  |
| C153 | 0.031(4) | 0.034(4) | 0.033(4) | -0.005(3) | 0.001(3)  | 0.004(3)  |
| C163 | 0.034(5) | 0.045(4) | 0.031(4) | -0.004(3) | 0.004(3)  | 0.007(3)  |
| C173 | 0.035(5) | 0.042(4) | 0.026(4) | 0.006(3)  | 0.002(3)  | 0.010(3)  |
| C183 | 0.029(4) | 0.033(4) | 0.032(4) | 0.004(3)  | -0.003(3) | -0.003(3) |
| C193 | 0.027(4) | 0.033(4) | 0.020(4) | -0.002(3) | -0.011(3) | -0.003(3) |
| C203 | 0.031(4) | 0.026(4) | 0.034(4) | 0.007(3)  | 0.006(3)  | 0.002(3)  |
| C213 | 0.017(4) | 0.031(4) | 0.032(4) | 0.001(3)  | -0.001(3) | 0.002(3)  |
| C223 | 0.022(4) | 0.020(4) | 0.032(4) | -0.004(3) | 0.000(3)  | 0.006(3)  |
| C233 | 0.022(4) | 0.033(4) | 0.027(4) | 0.002(3)  | -0.002(3) | 0.001(3)  |
| C243 | 0.033(4) | 0.037(4) | 0.025(4) | 0.002(3)  | 0.001(3)  | -0.003(3) |
| C253 | 0.043(5) | 0.043(4) | 0.029(4) | 0.000(3)  | 0.002(3)  | 0.002(3)  |
| C263 | 0.064(6) | 0.039(5) | 0.042(5) | -0.003(4) | 0.008(4)  | 0.006(4)  |
| C273 | 0.056(6) | 0.060(5) | 0.035(5) | -0.004(4) | 0.013(4)  | 0.008(4)  |
| C283 | 0.047(5) | 0.052(4) | 0.036(5) | 0.003(4)  | 0.008(4)  | 0.002(4)  |
| C293 | 0.028(4) | 0.048(4) | 0.024(4) | 0.008(3)  | -0.003(3) | 0.004(3)  |
| C303 | 0.030(4) | 0.045(4) | 0.026(4) | 0.001(3)  | -0.006(3) | -0.009(3) |
| C313 | 0.034(5) | 0.059(4) | 0.035(5) | 0.009(4)  | 0.000(4)  | -0.008(4) |
| C323 | 0.054(6) | 0.061(5) | 0.049(5) | 0.018(4)  | 0.007(4)  | -0.013(4) |
| C333 | 0.059(6) | 0.053(5) | 0.065(6) | 0.018(4)  | 0.018(5)  | -0.010(4) |

## SUPPORTING INFORMATION

|      |          |          |          |           |           |           |
|------|----------|----------|----------|-----------|-----------|-----------|
| C343 | 0.055(5) | 0.041(4) | 0.039(5) | 0.007(3)  | 0.012(4)  | -0.012(4) |
| C353 | 0.032(5) | 0.043(4) | 0.030(4) | 0.007(3)  | -0.002(3) | -0.004(3) |
| C363 | 0.020(4) | 0.032(4) | 0.028(4) | -0.001(3) | -0.006(3) | -0.005(3) |
| O373 | 0.033(3) | 0.049(3) | 0.034(3) | 0.003(2)  | 0.008(2)  | 0.000(2)  |
| C373 | 0.044(5) | 0.046(4) | 0.035(5) | 0.007(4)  | 0.016(4)  | -0.003(4) |
| N114 | 0.021(3) | 0.033(3) | 0.044(4) | 0.007(3)  | -0.001(3) | 0.001(3)  |
| C124 | 0.018(4) | 0.032(4) | 0.025(4) | -0.002(3) | -0.013(3) | -0.002(3) |
| N134 | 0.038(4) | 0.033(3) | 0.040(4) | -0.004(3) | 0.004(3)  | -0.002(3) |
| C144 | 0.025(4) | 0.037(4) | 0.039(4) | -0.001(3) | 0.000(3)  | 0.004(3)  |
| C154 | 0.035(5) | 0.039(4) | 0.040(5) | -0.008(3) | 0.001(3)  | 0.003(3)  |
| C164 | 0.040(5) | 0.051(4) | 0.042(5) | -0.011(4) | 0.007(4)  | 0.004(4)  |
| C174 | 0.030(5) | 0.052(4) | 0.035(4) | 0.005(3)  | 0.005(3)  | 0.005(4)  |
| C184 | 0.031(5) | 0.039(4) | 0.034(4) | 0.001(3)  | -0.007(3) | 0.003(3)  |
| C194 | 0.024(4) | 0.035(4) | 0.029(4) | -0.002(3) | -0.009(3) | -0.004(3) |
| C204 | 0.032(4) | 0.030(4) | 0.032(4) | 0.002(3)  | -0.007(3) | 0.006(3)  |
| C214 | 0.023(4) | 0.030(4) | 0.035(4) | -0.001(3) | -0.007(3) | -0.001(3) |
| C224 | 0.029(4) | 0.021(4) | 0.032(4) | 0.002(3)  | -0.006(3) | 0.002(3)  |
| C234 | 0.025(4) | 0.030(4) | 0.027(4) | 0.002(3)  | -0.009(3) | 0.000(3)  |
| C244 | 0.040(5) | 0.039(4) | 0.021(4) | -0.001(3) | -0.005(3) | 0.005(3)  |
| C254 | 0.051(5) | 0.036(4) | 0.033(5) | -0.001(3) | 0.001(4)  | 0.000(4)  |
| C264 | 0.072(6) | 0.040(5) | 0.038(5) | -0.004(4) | 0.010(4)  | 0.008(4)  |
| C274 | 0.061(6) | 0.050(4) | 0.031(5) | -0.006(4) | 0.005(4)  | 0.008(4)  |
| C284 | 0.050(5) | 0.050(4) | 0.042(5) | 0.001(4)  | 0.016(4)  | -0.001(4) |
| C294 | 0.029(4) | 0.044(4) | 0.026(4) | 0.004(3)  | -0.003(3) | 0.005(3)  |
| C304 | 0.027(4) | 0.044(4) | 0.030(4) | 0.004(3)  | -0.004(3) | 0.004(3)  |
| C314 | 0.041(5) | 0.057(4) | 0.030(4) | 0.013(4)  | -0.001(3) | 0.009(4)  |
| C324 | 0.041(5) | 0.054(4) | 0.050(5) | 0.018(4)  | 0.006(4)  | -0.002(4) |
| C334 | 0.049(6) | 0.044(5) | 0.061(6) | 0.013(4)  | 0.008(4)  | -0.002(4) |
| C344 | 0.041(5) | 0.037(4) | 0.068(6) | 0.011(4)  | 0.016(4)  | 0.000(4)  |
| C354 | 0.028(4) | 0.041(4) | 0.036(4) | 0.009(3)  | -0.002(3) | 0.000(3)  |
| C364 | 0.027(4) | 0.033(4) | 0.032(4) | 0.004(3)  | -0.003(3) | 0.000(3)  |
| O374 | 0.042(4) | 0.064(3) | 0.047(4) | 0.000(3)  | 0.014(3)  | -0.002(3) |
| C374 | 0.052(5) | 0.063(5) | 0.027(4) | 0.006(4)  | 0.008(4)  | -0.009(4) |
| N115 | 0.038(4) | 0.029(3) | 0.030(4) | 0.001(3)  | 0.008(3)  | 0.003(3)  |
| C125 | 0.037(4) | 0.029(4) | 0.025(4) | 0.010(3)  | 0.006(3)  | 0.002(3)  |
| N135 | 0.045(4) | 0.030(3) | 0.021(3) | 0.001(3)  | 0.012(3)  | -0.005(3) |
| C145 | 0.036(4) | 0.033(4) | 0.013(4) | 0.002(3)  | 0.003(3)  | -0.002(3) |
| C155 | 0.048(4) | 0.033(4) | 0.044(5) | 0.001(4)  | 0.013(4)  | -0.006(3) |
| C165 | 0.045(5) | 0.046(4) | 0.033(5) | 0.003(4)  | 0.017(4)  | -0.012(3) |
| C175 | 0.040(4) | 0.046(4) | 0.021(4) | 0.000(3)  | 0.011(4)  | -0.003(3) |
| C185 | 0.037(4) | 0.030(4) | 0.033(5) | 0.001(3)  | 0.013(4)  | 0.002(3)  |
| C195 | 0.036(4) | 0.034(4) | 0.018(4) | 0.001(3)  | 0.008(3)  | 0.000(3)  |
| C205 | 0.040(4) | 0.032(4) | 0.020(4) | 0.003(3)  | 0.002(3)  | 0.000(3)  |
| C215 | 0.037(4) | 0.026(3) | 0.023(4) | 0.003(3)  | 0.000(3)  | 0.003(3)  |
| C225 | 0.037(4) | 0.033(4) | 0.024(4) | 0.003(3)  | 0.001(3)  | -0.005(3) |
| C235 | 0.040(4) | 0.035(4) | 0.022(4) | 0.003(3)  | 0.004(4)  | -0.003(3) |
| C245 | 0.037(4) | 0.042(4) | 0.019(4) | 0.007(3)  | 0.008(3)  | -0.005(3) |
| C255 | 0.041(5) | 0.042(4) | 0.047(5) | 0.001(4)  | 0.005(4)  | -0.006(4) |
| C265 | 0.046(5) | 0.041(5) | 0.060(6) | 0.004(4)  | 0.002(4)  | -0.009(4) |
| C275 | 0.049(5) | 0.059(5) | 0.043(5) | 0.005(4)  | 0.008(4)  | -0.010(4) |
| C285 | 0.037(5) | 0.053(4) | 0.040(5) | 0.000(4)  | 0.003(4)  | -0.001(4) |
| C295 | 0.043(4) | 0.047(4) | 0.014(4) | 0.000(3)  | -0.007(4) | 0.001(3)  |
| C305 | 0.037(4) | 0.044(4) | 0.015(4) | 0.008(3)  | 0.004(3)  | 0.008(3)  |
| C315 | 0.038(5) | 0.064(5) | 0.042(5) | 0.005(4)  | 0.006(4)  | 0.011(4)  |
| C325 | 0.055(5) | 0.065(5) | 0.056(6) | 0.008(5)  | 0.014(5)  | 0.025(4)  |
| C335 | 0.072(6) | 0.033(5) | 0.071(6) | 0.003(4)  | 0.020(5)  | 0.014(4)  |
| C345 | 0.055(5) | 0.035(4) | 0.049(5) | 0.011(4)  | 0.015(4)  | 0.008(4)  |
| C355 | 0.039(4) | 0.038(4) | 0.020(4) | 0.003(3)  | 0.000(3)  | 0.008(3)  |
| C365 | 0.036(4) | 0.034(4) | 0.018(4) | 0.010(3)  | 0.008(3)  | 0.000(3)  |
| O375 | 0.038(3) | 0.053(3) | 0.056(4) | 0.004(3)  | 0.010(3)  | 0.001(3)  |
| C375 | 0.041(5) | 0.056(5) | 0.053(6) | 0.005(4)  | 0.009(4)  | 0.009(4)  |
| N116 | 0.042(3) | 0.033(3) | 0.025(3) | -0.002(3) | 0.001(3)  | -0.001(3) |
| C126 | 0.048(4) | 0.032(4) | 0.023(4) | 0.006(3)  | 0.012(4)  | 0.005(3)  |
| N136 | 0.043(4) | 0.032(3) | 0.030(3) | 0.000(3)  | 0.008(3)  | -0.006(3) |
| C146 | 0.048(4) | 0.037(4) | 0.016(4) | 0.005(3)  | 0.001(4)  | -0.003(3) |
| C156 | 0.054(5) | 0.039(4) | 0.042(5) | -0.003(4) | 0.007(4)  | -0.008(3) |
| C166 | 0.045(5) | 0.057(5) | 0.042(5) | 0.002(4)  | 0.007(4)  | -0.006(4) |
| C176 | 0.041(4) | 0.052(4) | 0.030(4) | 0.000(4)  | 0.002(4)  | 0.000(3)  |
| C186 | 0.044(4) | 0.044(4) | 0.025(4) | -0.003(3) | 0.000(4)  | 0.001(3)  |
| C196 | 0.044(4) | 0.041(4) | 0.019(4) | 0.011(3)  | 0.000(3)  | 0.000(3)  |
| C206 | 0.045(4) | 0.031(4) | 0.023(4) | -0.003(3) | 0.007(3)  | 0.004(3)  |
| C216 | 0.041(4) | 0.029(4) | 0.016(4) | 0.001(3)  | 0.002(3)  | -0.002(3) |
| C226 | 0.043(4) | 0.030(4) | 0.025(4) | 0.000(3)  | -0.002(3) | -0.004(3) |
| C236 | 0.041(4) | 0.037(4) | 0.026(4) | 0.002(3)  | -0.005(4) | 0.001(3)  |
| C246 | 0.044(4) | 0.036(4) | 0.021(4) | 0.004(3)  | -0.001(3) | -0.002(3) |
| C256 | 0.046(5) | 0.043(4) | 0.040(5) | 0.002(4)  | -0.006(4) | 0.000(4)  |
| C266 | 0.052(5) | 0.038(4) | 0.054(5) | -0.002(4) | -0.009(4) | -0.003(3) |
| C276 | 0.042(5) | 0.053(4) | 0.066(6) | 0.003(4)  | 0.000(4)  | -0.011(4) |
| C286 | 0.038(4) | 0.055(4) | 0.045(5) | 0.000(4)  | 0.000(4)  | 0.003(4)  |
| C296 | 0.036(4) | 0.048(4) | 0.035(5) | 0.005(4)  | -0.007(4) | 0.006(3)  |
| C306 | 0.044(4) | 0.044(4) | 0.021(4) | 0.008(3)  | -0.005(3) | 0.005(3)  |
| C316 | 0.049(5) | 0.060(4) | 0.034(5) | 0.009(4)  | -0.001(4) | 0.016(4)  |
| C326 | 0.067(5) | 0.061(5) | 0.051(5) | 0.010(4)  | 0.005(5)  | 0.028(4)  |
| C336 | 0.078(6) | 0.035(5) | 0.062(6) | 0.014(4)  | 0.017(5)  | 0.018(4)  |
| C346 | 0.060(5) | 0.037(4) | 0.039(5) | 0.007(4)  | 0.006(4)  | 0.009(4)  |
| C356 | 0.045(4) | 0.036(4) | 0.018(4) | 0.007(3)  | 0.008(3)  | 0.008(3)  |
| C366 | 0.045(4) | 0.037(4) | 0.013(4) | 0.003(3)  | 0.000(3)  | 0.002(3)  |

## SUPPORTING INFORMATION

|      |           |           |           |             |            |            |
|------|-----------|-----------|-----------|-------------|------------|------------|
| O376 | 0.043(3)  | 0.065(4)  | 0.056(4)  | 0.005(3)    | 0.008(3)   | 0.001(3)   |
| C376 | 0.047(5)  | 0.066(5)  | 0.045(5)  | 0.003(4)    | 0.001(4)   | 0.000(4)   |
| N117 | 0.046(4)  | 0.034(3)  | 0.026(3)  | -0.004(3)   | 0.010(3)   | 0.003(3)   |
| C127 | 0.040(4)  | 0.035(4)  | 0.021(4)  | 0.000(3)    | 0.001(3)   | 0.006(3)   |
| N137 | 0.044(4)  | 0.036(3)  | 0.016(3)  | -0.002(3)   | 0.005(3)   | 0.003(3)   |
| C147 | 0.047(4)  | 0.036(4)  | 0.012(4)  | -0.002(3)   | 0.002(3)   | 0.003(3)   |
| C157 | 0.050(4)  | 0.028(4)  | 0.036(5)  | 0.002(3)    | 0.004(4)   | -0.006(3)  |
| C167 | 0.046(4)  | 0.045(4)  | 0.029(4)  | 0.004(3)    | 0.007(4)   | -0.007(3)  |
| C177 | 0.041(4)  | 0.038(4)  | 0.016(4)  | 0.002(3)    | 0.006(3)   | 0.001(3)   |
| C187 | 0.039(4)  | 0.039(4)  | 0.030(4)  | 0.006(3)    | 0.003(4)   | 0.004(3)   |
| C197 | 0.041(4)  | 0.029(4)  | 0.019(4)  | 0.005(3)    | -0.003(3)  | 0.003(3)   |
| C207 | 0.047(4)  | 0.028(4)  | 0.026(4)  | -0.001(3)   | -0.006(3)  | 0.000(3)   |
| C217 | 0.037(4)  | 0.035(4)  | 0.019(4)  | 0.001(3)    | -0.001(3)  | 0.007(3)   |
| C227 | 0.043(4)  | 0.035(4)  | 0.023(4)  | -0.003(3)   | 0.000(3)   | 0.007(3)   |
| C237 | 0.034(4)  | 0.034(4)  | 0.024(4)  | 0.000(3)    | 0.001(3)   | 0.007(3)   |
| C247 | 0.038(4)  | 0.040(4)  | 0.026(4)  | 0.006(3)    | -0.010(4)  | 0.000(3)   |
| C257 | 0.036(4)  | 0.042(4)  | 0.057(5)  | 0.005(4)    | -0.014(4)  | 0.010(3)   |
| C267 | 0.046(5)  | 0.046(5)  | 0.078(7)  | 0.009(4)    | -0.010(5)  | -0.008(4)  |
| C277 | 0.047(5)  | 0.065(5)  | 0.051(5)  | 0.009(4)    | -0.009(4)  | -0.004(4)  |
| C287 | 0.042(5)  | 0.066(5)  | 0.044(5)  | 0.013(4)    | -0.004(4)  | 0.003(4)   |
| C297 | 0.042(4)  | 0.053(4)  | 0.022(4)  | 0.006(3)    | 0.001(3)   | 0.006(3)   |
| C307 | 0.048(4)  | 0.053(4)  | 0.018(4)  | 0.008(3)    | 0.004(4)   | 0.013(3)   |
| C317 | 0.047(5)  | 0.064(5)  | 0.037(5)  | 0.001(4)    | -0.010(4)  | 0.016(4)   |
| C327 | 0.054(5)  | 0.064(5)  | 0.070(6)  | 0.012(5)    | 0.005(5)   | 0.031(4)   |
| C337 | 0.068(5)  | 0.043(5)  | 0.078(6)  | 0.015(4)    | 0.006(5)   | 0.025(4)   |
| C347 | 0.058(5)  | 0.043(4)  | 0.057(5)  | 0.006(4)    | 0.012(4)   | 0.017(4)   |
| C357 | 0.041(4)  | 0.045(4)  | 0.028(4)  | 0.007(4)    | 0.000(4)   | 0.013(3)   |
| C367 | 0.041(4)  | 0.039(4)  | 0.023(4)  | 0.004(3)    | -0.005(3)  | 0.007(3)   |
| O377 | 0.046(3)  | 0.052(3)  | 0.040(3)  | -0.001(2)   | 0.003(3)   | -0.004(3)  |
| C377 | 0.046(5)  | 0.054(4)  | 0.043(5)  | -0.006(4)   | 0.001(4)   | 0.009(4)   |
| N118 | 0.035(3)  | 0.031(3)  | 0.020(3)  | 0.000(3)    | 0.005(3)   | 0.005(3)   |
| C128 | 0.030(4)  | 0.025(4)  | 0.025(4)  | 0.009(3)    | 0.003(3)   | 0.000(3)   |
| N138 | 0.037(3)  | 0.028(3)  | 0.029(4)  | 0.000(3)    | 0.009(3)   | -0.005(3)  |
| C148 | 0.034(4)  | 0.033(4)  | 0.011(4)  | 0.002(3)    | 0.002(3)   | 0.001(3)   |
| C158 | 0.040(4)  | 0.034(4)  | 0.027(4)  | -0.005(3)   | 0.008(4)   | -0.007(3)  |
| C168 | 0.039(4)  | 0.040(4)  | 0.032(4)  | -0.002(3)   | 0.010(4)   | -0.011(3)  |
| C178 | 0.034(4)  | 0.042(4)  | 0.020(4)  | -0.005(3)   | 0.011(3)   | -0.006(3)  |
| C188 | 0.036(4)  | 0.027(4)  | 0.034(5)  | 0.004(3)    | 0.011(4)   | -0.003(3)  |
| C198 | 0.032(4)  | 0.033(4)  | 0.019(4)  | 0.006(3)    | 0.008(3)   | -0.003(3)  |
| C208 | 0.036(4)  | 0.026(4)  | 0.026(4)  | -0.002(3)   | 0.003(3)   | -0.001(3)  |
| C218 | 0.033(4)  | 0.026(3)  | 0.020(4)  | 0.004(3)    | 0.000(3)   | 0.003(3)   |
| C228 | 0.034(4)  | 0.033(4)  | 0.028(4)  | -0.002(3)   | 0.001(3)   | -0.001(3)  |
| C238 | 0.033(4)  | 0.037(4)  | 0.020(4)  | -0.002(3)   | -0.001(3)  | 0.001(3)   |
| C248 | 0.038(4)  | 0.036(4)  | 0.022(4)  | 0.003(3)    | 0.003(4)   | 0.001(3)   |
| C258 | 0.030(4)  | 0.040(4)  | 0.041(5)  | 0.006(4)    | 0.003(4)   | 0.003(3)   |
| C268 | 0.035(4)  | 0.035(4)  | 0.049(5)  | -0.001(4)   | -0.008(4)  | -0.004(3)  |
| C278 | 0.028(4)  | 0.053(4)  | 0.047(5)  | 0.003(4)    | 0.001(4)   | -0.009(4)  |
| C288 | 0.028(4)  | 0.049(4)  | 0.037(5)  | -0.005(4)   | 0.000(4)   | -0.002(3)  |
| C298 | 0.036(4)  | 0.044(4)  | 0.020(4)  | 0.000(3)    | -0.004(4)  | -0.004(3)  |
| C308 | 0.030(4)  | 0.046(4)  | 0.016(4)  | 0.004(3)    | -0.002(3)  | 0.010(3)   |
| C318 | 0.037(5)  | 0.053(4)  | 0.046(5)  | 0.003(4)    | 0.000(4)   | 0.014(4)   |
| C328 | 0.051(5)  | 0.058(5)  | 0.055(6)  | 0.010(5)    | 0.014(5)   | 0.019(4)   |
| C338 | 0.060(5)  | 0.036(5)  | 0.071(6)  | 0.008(4)    | 0.014(5)   | 0.015(4)   |
| C348 | 0.047(5)  | 0.036(4)  | 0.047(5)  | 0.009(4)    | 0.010(4)   | 0.008(3)   |
| C358 | 0.033(4)  | 0.039(4)  | 0.016(4)  | -0.003(3)   | -0.001(3)  | 0.005(3)   |
| C368 | 0.039(4)  | 0.031(4)  | 0.015(4)  | 0.005(3)    | 0.005(3)   | 0.000(3)   |
| O378 | 0.033(3)  | 0.046(3)  | 0.042(3)  | -0.002(3)   | 0.010(3)   | 0.001(2)   |
| C378 | 0.043(5)  | 0.049(5)  | 0.050(5)  | -0.002(4)   | 0.010(4)   | 0.005(4)   |
| C41  | 0.087(11) | 0.030(8)  | 0.196(16) | -0.061(9)   | 0.004(11)  | 0.017(7)   |
| Cl1  | 0.245(7)  | 0.058(3)  | 0.116(4)  | 0.038(3)    | 0.054(4)   | 0.012(3)   |
| Cl2  | 0.145(6)  | 0.177(9)  | 0.474(18) | -0.215(10)  | -0.052(9)  | 0.036(6)   |
| Cl3  | 0.250(6)  | 0.058(2)  | 0.066(3)  | -0.0110(19) | -0.009(3)  | -0.009(3)  |
| C41B | 0.18(3)   | 0.06(2)   | 0.20(3)   | -0.02(2)    | -0.03(3)   | 0.05(2)    |
| Cl31 | 0.297(19) | 0.119(14) | 0.26(2)   | -0.110(16)  | -0.141(16) | 0.103(13)  |
| Cl32 | 0.149(11) | 0.013(5)  | 0.098(8)  | -0.004(5)   | -0.017(7)  | 0.021(5)   |
| Cl33 | 0.43(3)   | 0.036(7)  | 0.203(16) | 0.049(9)    | -0.064(17) | -0.049(11) |
| C42  | 0.053(8)  | 0.020(6)  | 0.131(12) | -0.017(7)   | 0.010(8)   | -0.002(6)  |
| Cl4  | 0.100(4)  | 0.096(4)  | 0.278(9)  | -0.068(5)   | -0.017(5)  | -0.008(3)  |
| Cl5  | 0.171(5)  | 0.046(3)  | 0.094(3)  | 0.029(3)    | 0.021(3)   | -0.010(3)  |
| Cl6  | 0.174(5)  | 0.072(3)  | 0.070(3)  | -0.0167(19) | 0.017(3)   | 0.006(3)   |
| C42B | 0.11(3)   | 0.06(2)   | 0.17(3)   | -0.05(2)    | -0.02(2)   | 0.00(3)    |
| Cl34 | 0.22(2)   | 0.038(8)  | 0.166(15) | -0.024(8)   | -0.046(13) | -0.057(9)  |
| Cl35 | 0.156(16) | 0.074(12) | 0.40(3)   | -0.098(19)  | -0.038(18) | 0.021(11)  |
| Cl36 | 0.195(16) | 0.035(7)  | 0.178(16) | 0.003(9)    | 0.013(13)  | -0.016(8)  |
| C43  | 0.21(2)   | 0.052(14) | 0.080(15) | -0.005(12)  | 0.010(16)  | -0.018(16) |
| Cl7  | 0.49(2)   | 0.209(12) | 0.140(8)  | -0.106(7)   | 0.192(11)  | -0.266(13) |
| Cl8  | 0.231(11) | 0.189(9)  | 0.403(15) | 0.180(10)   | 0.100(10)  | 0.150(9)   |
| Cl9  | 0.139(6)  | 0.113(5)  | 0.129(6)  | -0.019(4)   | -0.024(4)  | -0.062(4)  |
| C43B | 0.20(2)   | 0.031(16) | 0.12(2)   | -0.004(16)  | 0.025(18)  | -0.020(16) |
| Cl37 | 0.259(15) | 0.050(5)  | 0.44(2)   | 0.050(10)   | -0.255(16) | -0.025(7)  |
| Cl38 | 0.254(13) | 0.038(4)  | 0.172(8)  | -0.018(5)   | 0.148(8)   | -0.038(6)  |
| Cl39 | 0.258(12) | 0.064(5)  | 0.162(9)  | 0.020(5)    | 0.082(8)   | 0.041(7)   |
| C44  | 0.069(9)  | 0.032(7)  | 0.118(13) | 0.007(8)    | -0.024(10) | -0.021(7)  |
| Cl10 | 0.092(4)  | 0.090(4)  | 0.313(12) | -0.065(6)   | -0.009(5)  | -0.019(3)  |
| Cl11 | 0.151(7)  | 0.094(5)  | 0.347(10) | 0.098(6)    | 0.022(7)   | -0.003(5)  |
| Cl12 | 0.199(6)  | 0.074(3)  | 0.077(3)  | -0.026(2)   | 0.010(3)   | 0.008(3)   |
| C44B | 0.106(14) | 0.099(14) | 0.107(14) | 0.007(6)    | 0.007(6)   | 0.006(6)   |

## SUPPORTING INFORMATION

|      |           |           |           |             |            |            |
|------|-----------|-----------|-----------|-------------|------------|------------|
| Cl40 | 0.206(17) | 0.059(7)  | 0.150(11) | -0.022(7)   | -0.015(10) | -0.065(8)  |
| Cl41 | 0.103(8)  | 0.032(5)  | 0.021(4)  | 0.021(3)    | 0.016(4)   | -0.011(5)  |
| Cl42 | 0.119(8)  | 0.037(5)  | 0.160(11) | 0.026(6)    | 0.031(8)   | 0.007(5)   |
| C45  | 0.090(10) | 0.055(8)  | 0.029(6)  | 0.015(6)    | 0.008(7)   | 0.002(7)   |
| Cl13 | 0.117(4)  | 0.035(2)  | 0.090(3)  | -0.0026(17) | -0.010(2)  | 0.012(2)   |
| Cl14 | 0.157(4)  | 0.058(2)  | 0.135(4)  | 0.021(2)    | 0.045(3)   | 0.011(2)   |
| Cl15 | 0.086(3)  | 0.062(3)  | 0.166(5)  | -0.036(3)   | -0.004(3)  | 0.019(2)   |
| C45B | 0.054(10) | 0.042(10) | 0.054(10) | 0.003(6)    | 0.008(6)   | 0.002(6)   |
| Cl43 | 0.120(13) | 0.168(18) | 0.31(3)   | -0.133(17)  | -0.011(13) | -0.013(10) |
| Cl44 | 0.169(12) | 0.073(7)  | 0.064(7)  | -0.020(5)   | 0.003(7)   | 0.008(7)   |
| Cl45 | 0.230(12) | 0.072(9)  | 0.169(11) | 0.068(8)    | -0.004(9)  | -0.018(8)  |
| C46  | 0.152(15) | 0.035(8)  | 0.073(10) | -0.012(7)   | 0.032(10)  | -0.044(9)  |
| Cl16 | 0.090(3)  | 0.095(3)  | 0.140(5)  | -0.028(3)   | -0.008(3)  | -0.031(3)  |
| Cl17 | 0.357(12) | 0.115(6)  | 0.227(9)  | 0.063(6)    | 0.014(8)   | 0.079(6)   |
| Cl18 | 0.347(12) | 0.106(4)  | 0.126(5)  | -0.070(4)   | 0.137(6)   | -0.126(6)  |
| C46B | 0.104(15) | 0.094(15) | 0.101(15) | 0.010(6)    | 0.006(6)   | 0.002(6)   |
| Cl46 | 0.188(17) | 0.079(10) | 0.29(2)   | -0.061(13)  | -0.081(18) | 0.026(11)  |
| Cl47 | 0.041(6)  | 0.025(5)  | 0.087(7)  | 0.012(5)    | 0.024(5)   | 0.023(4)   |
| Cl48 | 0.149(12) | 0.048(7)  | 0.128(11) | 0.003(6)    | 0.014(9)   | -0.024(7)  |
| C47  | 0.134(15) | 0.054(10) | 0.083(11) | -0.018(9)   | -0.020(10) | 0.016(10)  |
| Cl19 | 0.259(10) | 0.120(5)  | 0.122(5)  | -0.067(4)   | 0.099(6)   | -0.097(6)  |
| Cl20 | 0.200(8)  | 0.121(6)  | 0.249(9)  | 0.063(6)    | 0.042(7)   | 0.094(6)   |
| Cl21 | 0.084(3)  | 0.070(3)  | 0.130(4)  | 0.001(3)    | -0.011(3)  | -0.017(2)  |
| C47B | 0.18(3)   | 0.018(18) | 0.11(2)   | 0.018(18)   | 0.03(2)    | -0.033(19) |
| Cl49 | 0.236(18) | 0.067(7)  | 0.119(11) | 0.010(7)    | 0.084(11)  | 0.007(10)  |
| Cl50 | 0.100(8)  | 0.013(5)  | 0.054(6)  | -0.011(4)   | 0.042(5)   | -0.021(5)  |
| Cl51 | 0.200(17) | 0.078(8)  | 0.26(2)   | -0.046(11)  | -0.075(18) | 0.024(10)  |
| C48  | 0.114(17) | 0.028(12) | 0.079(14) | -0.019(10)  | 0.018(12)  | -0.022(11) |
| Cl22 | 0.187(8)  | 0.051(3)  | 0.093(5)  | -0.001(3)   | 0.055(5)   | -0.023(4)  |
| Cl23 | 0.137(6)  | 0.039(4)  | 0.111(8)  | 0.003(5)    | -0.029(6)  | -0.001(4)  |
| Cl24 | 0.098(4)  | 0.057(3)  | 0.171(6)  | 0.032(3)    | 0.026(4)   | 0.004(3)   |
| C48B | 0.19(2)   | 0.018(12) | 0.094(17) | 0.015(11)   | 0.058(16)  | -0.014(14) |
| Cl52 | 0.346(19) | 0.107(10) | 0.278(14) | 0.052(9)    | -0.079(14) | 0.107(11)  |
| Cl53 | 0.328(19) | 0.092(10) | 0.087(7)  | -0.042(6)   | 0.074(9)   | -0.113(10) |
| Cl54 | 0.141(7)  | 0.117(6)  | 0.152(7)  | -0.041(5)   | -0.007(5)  | -0.057(5)  |

Table S26: Bond lengths (Å) and angles (deg) for 5e.

|           |          |            |          |
|-----------|----------|------------|----------|
| N111-C361 | 1.326(7) | C351-C361  | 1.469(7) |
| N111-C121 | 1.348(7) | O371-C371  | 1.413(7) |
| C121-N131 | 1.342(7) | C371-H37A1 | 0.9800   |
| C121-C211 | 1.436(7) | C371-H37B1 | 0.9800   |
| N131-C141 | 1.349(7) | C371-H37C1 | 0.9800   |
| C141-C151 | 1.417(8) | N112-C362  | 1.327(7) |
| C141-C191 | 1.446(7) | N112-C122  | 1.369(7) |
| C151-C161 | 1.345(8) | C122-N132  | 1.347(7) |
| C151-H151 | 0.9500   | C122-C212  | 1.419(7) |
| C161-C171 | 1.402(8) | N132-C142  | 1.355(7) |
| C161-H161 | 0.9500   | C142-C152  | 1.420(7) |
| C171-C181 | 1.350(8) | C142-C192  | 1.433(7) |
| C171-O371 | 1.371(7) | C152-C162  | 1.344(8) |
| C181-C191 | 1.414(8) | C152-H152  | 0.9500   |
| C181-H181 | 0.9500   | C162-C172  | 1.424(8) |
| C191-C201 | 1.381(7) | C162-H162  | 0.9500   |
| C201-C211 | 1.391(7) | C172-C182  | 1.349(7) |
| C201-H201 | 0.9500   | C172-O372  | 1.361(7) |
| C211-C221 | 1.377(7) | C182-C192  | 1.415(7) |
| C221-C231 | 1.364(7) | C182-H182  | 0.9500   |
| C221-H221 | 0.9500   | C192-C202  | 1.381(7) |
| C231-C361 | 1.440(7) | C202-C212  | 1.386(7) |
| C231-C241 | 1.476(7) | C202-H202  | 0.9500   |
| C241-C251 | 1.393(8) | C212-C222  | 1.409(7) |
| C241-C291 | 1.395(8) | C222-C232  | 1.352(7) |
| C251-C261 | 1.381(8) | C222-H222  | 0.9500   |
| C251-H251 | 0.9500   | C232-C362  | 1.439(7) |
| C261-C271 | 1.392(8) | C232-C242  | 1.468(7) |
| C261-H261 | 0.9500   | C242-C252  | 1.408(7) |
| C271-C281 | 1.358(8) | C242-C292  | 1.409(8) |
| C271-H271 | 0.9500   | C252-C262  | 1.349(8) |
| C281-C291 | 1.403(8) | C252-H252  | 0.9500   |
| C281-H281 | 0.9500   | C262-C272  | 1.395(8) |
| C291-C301 | 1.488(7) | C262-H262  | 0.9500   |
| C301-C351 | 1.387(8) | C272-C282  | 1.377(8) |
| C301-C311 | 1.405(8) | C272-H272  | 0.9500   |
| C311-C321 | 1.370(8) | C282-C292  | 1.400(8) |
| C311-H311 | 0.9500   | C282-H282  | 0.9500   |
| C321-C331 | 1.396(8) | C292-C302  | 1.466(8) |
| C321-H321 | 0.9500   | C302-C312  | 1.398(8) |
| C331-C341 | 1.379(8) | C302-C352  | 1.402(8) |
| C331-H331 | 0.9500   | C312-C322  | 1.372(8) |
| C341-C351 | 1.403(7) | C312-H312  | 0.9500   |
| C341-H341 | 0.9500   | C322-C332  | 1.390(9) |

## SUPPORTING INFORMATION

|            |          |            |          |
|------------|----------|------------|----------|
| C322-H322  | 0.9500   | C264-H264  | 0.9500   |
| C332-C342  | 1.387(8) | C274-C284  | 1.363(8) |
| C332-H332  | 0.9500   | C274-H274  | 0.9500   |
| C342-C352  | 1.384(8) | C284-C294  | 1.401(8) |
| C342-H342  | 0.9500   | C284-H284  | 0.9500   |
| C352-C362  | 1.477(8) | C294-C304  | 1.483(7) |
| O372-C372  | 1.425(6) | C304-C354  | 1.396(7) |
| C372-H37A2 | 0.9800   | C304-C314  | 1.406(8) |
| C372-H37B2 | 0.9800   | C314-C324  | 1.373(8) |
| C372-H37C2 | 0.9800   | C314-H314  | 0.9500   |
| N113-C363  | 1.336(7) | C324-C334  | 1.391(8) |
| N113-C123  | 1.352(7) | C324-H324  | 0.9500   |
| C123-N133  | 1.351(7) | C334-C344  | 1.374(8) |
| C123-C213  | 1.424(7) | C334-H334  | 0.9500   |
| N133-C143  | 1.356(7) | C344-C354  | 1.404(7) |
| C143-C153  | 1.411(7) | C344-H344  | 0.9500   |
| C143-C193  | 1.438(7) | C354-C364  | 1.463(7) |
| C153-C163  | 1.352(8) | O374-C374  | 1.422(7) |
| C153-H153  | 0.9500   | C374-H37A4 | 0.9800   |
| C163-C173  | 1.421(8) | C374-H37B4 | 0.9800   |
| C163-H163  | 0.9500   | C374-H37C4 | 0.9800   |
| C173-C183  | 1.347(7) | N115-C365  | 1.326(7) |
| C173-O373  | 1.362(7) | N115-C125  | 1.361(7) |
| C183-C193  | 1.423(7) | C125-N135  | 1.363(7) |
| C183-H183  | 0.9500   | C125-C215  | 1.423(7) |
| C193-C203  | 1.383(7) | N135-C145  | 1.337(7) |
| C203-C213  | 1.380(7) | C145-C195  | 1.413(7) |
| C203-H203  | 0.9500   | C145-C155  | 1.435(8) |
| C213-C223  | 1.404(7) | C155-C165  | 1.358(8) |
| C223-C233  | 1.356(7) | C155-H155  | 0.9500   |
| C223-H223  | 0.9500   | C165-C175  | 1.409(8) |
| C233-C363  | 1.439(7) | C165-H165  | 0.9500   |
| C233-C243  | 1.464(7) | C175-O375  | 1.354(7) |
| C243-C253  | 1.402(7) | C175-C185  | 1.362(8) |
| C243-C293  | 1.415(7) | C185-C195  | 1.438(8) |
| C253-C263  | 1.365(8) | C185-H185  | 0.9500   |
| C253-H253  | 0.9500   | C195-C205  | 1.393(7) |
| C263-C273  | 1.388(8) | C205-C215  | 1.418(7) |
| C263-H263  | 0.9500   | C205-H205  | 0.9500   |
| C273-C283  | 1.370(8) | C215-C225  | 1.411(7) |
| C273-H273  | 0.9500   | C225-C235  | 1.375(8) |
| C283-C293  | 1.397(8) | C225-H225  | 0.9500   |
| C283-H283  | 0.9500   | C235-C365  | 1.442(7) |
| C293-C303  | 1.463(8) | C235-C245  | 1.467(8) |
| C303-C353  | 1.402(8) | C245-C255  | 1.386(8) |
| C303-C313  | 1.408(8) | C245-C295  | 1.416(8) |
| C313-C323  | 1.369(8) | C255-C265  | 1.374(8) |
| C313-H313  | 0.9500   | C255-H255  | 0.9500   |
| C323-C333  | 1.392(8) | C265-C275  | 1.383(8) |
| C323-H323  | 0.9500   | C265-H265  | 0.9500   |
| C333-C343  | 1.378(8) | C275-C285  | 1.348(8) |
| C333-H333  | 0.9500   | C275-H275  | 0.9500   |
| C343-C353  | 1.394(7) | C285-C295  | 1.392(8) |
| C343-H343  | 0.9500   | C285-H285  | 0.9500   |
| C353-C363  | 1.469(7) | C295-C305  | 1.468(7) |
| O373-C373  | 1.419(6) | C305-C355  | 1.401(8) |
| C373-H37A3 | 0.9800   | C305-C315  | 1.408(8) |
| C373-H37B3 | 0.9800   | C315-C325  | 1.362(8) |
| C373-H37C3 | 0.9800   | C315-H315  | 0.9500   |
| N114-C364  | 1.321(7) | C325-C335  | 1.359(9) |
| N114-C124  | 1.351(7) | C325-H325  | 0.9500   |
| C124-N134  | 1.340(7) | C335-C345  | 1.370(8) |
| C124-C214  | 1.430(7) | C335-H335  | 0.9500   |
| N134-C144  | 1.356(7) | C345-C355  | 1.388(7) |
| C144-C154  | 1.428(8) | C345-H345  | 0.9500   |
| C144-C194  | 1.445(7) | C355-C365  | 1.470(8) |
| C154-C164  | 1.343(8) | O375-C375  | 1.441(7) |
| C154-H154  | 0.9500   | C375-H37A5 | 0.9800   |
| C164-C174  | 1.407(8) | C375-H37B5 | 0.9800   |
| C164-H164  | 0.9500   | C375-H37C5 | 0.9800   |
| C174-C184  | 1.351(8) | N116-C366  | 1.331(7) |
| C174-O374  | 1.356(7) | N116-C126  | 1.366(7) |
| C184-C194  | 1.414(8) | C126-N136  | 1.355(7) |
| C184-H184  | 0.9500   | C126-C216  | 1.408(7) |
| C194-C204  | 1.378(7) | N136-C146  | 1.343(7) |
| C204-C214  | 1.397(8) | C146-C196  | 1.435(8) |
| C204-H204  | 0.9500   | C146-C156  | 1.439(8) |
| C214-C224  | 1.383(7) | C156-C166  | 1.352(8) |
| C224-C234  | 1.373(7) | C156-H156  | 0.9500   |
| C224-H224  | 0.9500   | C166-C176  | 1.407(8) |
| C234-C364  | 1.443(7) | C166-H166  | 0.9500   |
| C234-C244  | 1.468(7) | C176-O376  | 1.361(7) |
| C244-C254  | 1.389(7) | C176-C186  | 1.373(8) |
| C244-C294  | 1.411(8) | C186-C196  | 1.430(8) |
| C254-C264  | 1.376(8) | C186-H186  | 0.9500   |
| C254-H254  | 0.9500   | C196-C206  | 1.397(7) |
| C264-C274  | 1.391(8) | C206-C216  | 1.388(7) |

## SUPPORTING INFORMATION

|            |          |            |           |
|------------|----------|------------|-----------|
| C206-H206  | 0.9500   | C148-C158  | 1.452(7)  |
| C216-C226  | 1.424(7) | C158-C168  | 1.352(8)  |
| C226-C236  | 1.386(7) | C158-H158  | 0.9500    |
| C226-H226  | 0.9500   | C168-C178  | 1.408(7)  |
| C236-C366  | 1.433(7) | C168-H168  | 0.9500    |
| C236-C246  | 1.480(8) | C178-O378  | 1.355(7)  |
| C246-C256  | 1.398(7) | C178-C188  | 1.361(7)  |
| C246-C296  | 1.408(8) | C188-C198  | 1.428(8)  |
| C256-C266  | 1.370(8) | C188-H188  | 0.9500    |
| C256-H256  | 0.9500   | C198-C208  | 1.380(7)  |
| C266-C276  | 1.385(8) | C208-C218  | 1.408(7)  |
| C266-H266  | 0.9500   | C208-H208  | 0.9500    |
| C276-C286  | 1.359(7) | C218-C228  | 1.414(7)  |
| C276-H276  | 0.9500   | C228-C238  | 1.370(7)  |
| C286-C296  | 1.407(8) | C228-H228  | 0.9500    |
| C286-H286  | 0.9500   | C238-C368  | 1.437(7)  |
| C296-C306  | 1.455(7) | C238-C248  | 1.461(7)  |
| C306-C356  | 1.396(7) | C248-C258  | 1.387(7)  |
| C306-C316  | 1.416(8) | C248-C298  | 1.416(8)  |
| C316-C326  | 1.356(8) | C258-C268  | 1.368(8)  |
| C316-H316  | 0.9500   | C258-H258  | 0.9500    |
| C326-C336  | 1.370(8) | C268-C278  | 1.385(8)  |
| C326-H326  | 0.9500   | C268-H268  | 0.9500    |
| C336-C346  | 1.381(8) | C278-C288  | 1.358(8)  |
| C336-H336  | 0.9500   | C278-H278  | 0.9500    |
| C346-C356  | 1.392(7) | C288-C298  | 1.405(8)  |
| C346-H346  | 0.9500   | C288-H288  | 0.9500    |
| C356-C366  | 1.472(7) | C298-C308  | 1.466(7)  |
| O376-C376  | 1.433(7) | C308-C318  | 1.401(8)  |
| C376-H37A6 | 0.9800   | C308-C358  | 1.413(8)  |
| C376-H37B6 | 0.9800   | C318-C328  | 1.354(8)  |
| C376-H37C6 | 0.9800   | C318-H318  | 0.9500    |
| N117-C367  | 1.325(7) | C328-C338  | 1.363(9)  |
| N117-C127  | 1.360(7) | C328-H328  | 0.9500    |
| C127-N137  | 1.344(7) | C338-C348  | 1.377(8)  |
| C127-C217  | 1.422(7) | C338-H338  | 0.9500    |
| N137-C147  | 1.342(7) | C348-C358  | 1.388(7)  |
| C147-C197  | 1.428(7) | C348-H348  | 0.9500    |
| C147-C157  | 1.432(8) | C358-C368  | 1.468(7)  |
| C157-C167  | 1.354(7) | O378-C378  | 1.434(7)  |
| C157-H157  | 0.9500   | C378-H37A8 | 0.9800    |
| C167-C177  | 1.420(7) | C378-H37B8 | 0.9800    |
| C167-H167  | 0.9500   | C378-H37C8 | 0.9800    |
| C177-O377  | 1.359(7) | C41-CI1    | 1.717(12) |
| C177-C187  | 1.363(8) | C41-CI2    | 1.722(12) |
| C187-C197  | 1.428(7) | C41-CI3    | 1.735(12) |
| C187-H187  | 0.9500   | C41-H41    | 1.0000    |
| C197-C207  | 1.389(7) | C41B-CI31  | 1.72(2)   |
| C207-C217  | 1.405(7) | C41B-CI32  | 1.73(2)   |
| C207-H207  | 0.9500   | C41B-CI33  | 1.74(2)   |
| C217-C227  | 1.400(7) | C41B-H41B  | 1.0000    |
| C227-C237  | 1.381(7) | C42-CI6    | 1.724(11) |
| C227-H227  | 0.9500   | C42-CI5    | 1.742(11) |
| C237-C367  | 1.422(7) | C42-CI4    | 1.745(10) |
| C237-C247  | 1.477(8) | C42-H42    | 1.0000    |
| C247-C257  | 1.387(7) | C42B-CI35  | 1.71(2)   |
| C247-C297  | 1.413(8) | C42B-CI36  | 1.73(2)   |
| C257-C267  | 1.387(8) | C42B-CI34  | 1.74(2)   |
| C257-H257  | 0.9500   | C42B-H42B  | 1.0000    |
| C267-C277  | 1.379(8) | C43-CI8    | 1.696(15) |
| C267-H267  | 0.9500   | C43-CI9    | 1.707(16) |
| C277-C287  | 1.366(8) | C43-CI7    | 1.711(15) |
| C277-H277  | 0.9500   | C43-H43    | 1.0000    |
| C287-C297  | 1.411(8) | C43B-CI38  | 1.69(2)   |
| C287-H287  | 0.9500   | C43B-CI39  | 1.72(2)   |
| C297-C307  | 1.461(8) | C43B-CI37  | 1.73(2)   |
| C307-C317  | 1.402(8) | C43B-H43B  | 1.0000    |
| C307-C357  | 1.403(8) | C44-CI11   | 1.671(11) |
| C317-C327  | 1.350(8) | C44-CI12   | 1.685(12) |
| C317-H317  | 0.9500   | C44-CI10   | 1.744(11) |
| C327-C337  | 1.382(9) | C44-H44    | 1.0000    |
| C327-H327  | 0.9500   | C44B-CI41  | 1.72(2)   |
| C337-C347  | 1.357(8) | C44B-CI42  | 1.73(2)   |
| C337-H337  | 0.9500   | C44B-CI40  | 1.75(2)   |
| C347-C357  | 1.394(7) | C44B-H44B  | 1.0000    |
| C347-H347  | 0.9500   | C45-CI14   | 1.740(10) |
| C357-C367  | 1.483(8) | C45-CI15   | 1.741(10) |
| O377-C377  | 1.438(6) | C45-CI13   | 1.760(10) |
| C377-H37A7 | 0.9800   | C45-H45    | 1.0000    |
| C377-H37B7 | 0.9800   | C45B-CI44  | 1.69(2)   |
| C377-H37C7 | 0.9800   | C45B-CI45  | 1.71(2)   |
| N118-C368  | 1.339(7) | C45B-CI43  | 1.71(2)   |
| N118-C128  | 1.369(7) | C45B-H45B  | 1.0000    |
| C128-N138  | 1.345(7) | C46-CI17   | 1.675(12) |
| C128-C218  | 1.425(7) | C46-CI18   | 1.715(11) |
| N138-C148  | 1.337(7) | C46-CI16   | 1.735(13) |
| C148-C198  | 1.421(7) | C46-H46    | 1.0000    |



## SUPPORTING INFORMATION

|                |           |                  |          |
|----------------|-----------|------------------|----------|
| C46B-CI47      | 1.72(2)   | C351-C341-H341   | 119.7    |
| C46B-CI48      | 1.73(2)   | C301-C351-C341   | 120.3(6) |
| C46B-CI46      | 1.75(2)   | C301-C351-C361   | 120.7(6) |
| C46B-H46B      | 1.0000    | C341-C351-C361   | 119.0(6) |
| C47-CI21       | 1.718(13) | N111-C361-C231   | 122.6(6) |
| C47-CI20       | 1.720(13) | N111-C361-C351   | 118.3(6) |
| C47-CI19       | 1.762(12) | C231-C361-C351   | 119.1(6) |
| C47-H47        | 1.0000    | C171-O371-C371   | 118.2(6) |
| C47B-CI50      | 1.72(2)   | O371-C371-H37A1  | 109.5    |
| C47B-CI51      | 1.74(2)   | O371-C371-H37B1  | 109.5    |
| C47B-CI49      | 1.75(2)   | H37A1-C371-H37B1 | 109.5    |
| C47B-H47B      | 1.0000    | O371-C371-H37C1  | 109.5    |
| C48-CI24       | 1.710(14) | H37A1-C371-H37C1 | 109.5    |
| C48-CI22       | 1.734(14) | H37B1-C371-H37C1 | 109.5    |
| C48-CI23       | 1.743(15) | C362-N112-C122   | 119.2(5) |
| C48-H48        | 1.0000    | N132-C122-N112   | 115.4(6) |
| C48B-CI53      | 1.71(2)   | N132-C122-C212   | 123.4(6) |
| C48B-CI54      | 1.72(2)   | N112-C122-C212   | 121.2(6) |
| C48B-CI52      | 1.74(2)   | C122-N132-C142   | 117.3(6) |
| C48B-H48B      | 1.0000    | N132-C142-C152   | 118.4(6) |
| C361-N111-C121 | 119.6(6)  | N132-C142-C192   | 123.0(6) |
| N131-C121-N111 | 115.8(6)  | C152-C142-C192   | 118.7(6) |
| N131-C121-C211 | 122.4(6)  | C162-C152-C142   | 119.8(6) |
| N111-C121-C211 | 121.7(6)  | C162-C152-H152   | 120.1    |
| C121-N131-C141 | 119.2(6)  | C142-C152-H152   | 120.1    |
| N131-C141-C151 | 120.2(6)  | C152-C162-C172   | 122.1(6) |
| N131-C141-C191 | 122.1(6)  | C152-C162-H162   | 118.9    |
| C151-C141-C191 | 117.6(6)  | C172-C162-H162   | 125.5(6) |
| C161-C151-C141 | 120.9(7)  | C182-C172-O372   | 119.3(6) |
| C161-C151-H151 | 119.5     | C182-C172-C162   | 115.2(6) |
| C141-C151-H151 | 121.3(7)  | O372-C172-C162   | 121.1(6) |
| C151-C161-C171 | 119.3     | C172-C182-C192   | 119.4    |
| C151-C161-H161 | 119.3     | C172-C182-H182   | 123.2(6) |
| C171-C161-H161 | 125.4(7)  | C192-C182-H182   | 117.8(6) |
| C181-C171-O371 | 120.4(6)  | C202-C192-C182   | 119.0(6) |
| C181-C171-C161 | 114.2(6)  | C202-C192-C142   | 120.3(6) |
| O371-C171-C161 | 120.7(7)  | C182-C192-C142   | 119.9    |
| C171-C181-C191 | 119.7     | C192-C202-C212   | 119.9    |
| C171-C181-H181 | 119.7     | C192-C202-H202   | 124.3(6) |
| C191-C181-H181 | 123.8(6)  | C212-C202-H202   | 118.2(6) |
| C201-C191-C181 | 117.3(6)  | C202-C212-C222   | 117.6(6) |
| C201-C191-C141 | 118.9(6)  | C202-C212-C122   | 121.8(6) |
| C181-C191-C141 | 121.4(6)  | C222-C212-C122   | 119.1    |
| C191-C201-C211 | 119.3     | C232-C222-C212   | 119.1    |
| C191-C201-H201 | 119.3     | C232-C222-H222   | 119.1    |
| C211-C201-H201 | 125.9(6)  | C212-C222-H222   | 117.1(6) |
| C221-C211-C201 | 116.7(6)  | C222-C232-C362   | 123.4(6) |
| C221-C211-C121 | 117.4(6)  | C222-C232-C242   | 119.4(6) |
| C201-C211-C121 | 122.9(6)  | C362-C232-C242   | 118.6(6) |
| C231-C221-C211 | 118.5     | C252-C242-C292   | 121.3(6) |
| C231-C221-H221 | 118.5     | C252-C242-C232   | 120.0(6) |
| C211-C221-H221 | 116.5(6)  | C292-C242-C232   | 121.7(7) |
| C221-C231-C361 | 123.6(6)  | C262-C252-C242   | 119.2    |
| C221-C231-C241 | 119.9(5)  | C262-C252-H252   | 119.2    |
| C361-C231-C241 | 119.3(6)  | C242-C252-H252   | 120.6(7) |
| C251-C241-C291 | 121.1(6)  | C252-C262-C272   | 119.7    |
| C251-C241-C231 | 119.6(6)  | C252-C262-H262   | 119.7    |
| C291-C241-C231 | 121.4(7)  | C272-C262-H262   | 118.9(7) |
| C261-C251-C241 | 119.3     | C282-C272-C262   | 120.6    |
| C261-C251-H251 | 119.3     | C282-C272-H272   | 120.6    |
| C241-C251-H251 | 119.0(7)  | C262-C272-H272   | 122.0(7) |
| C251-C261-C271 | 120.5     | C272-C282-C292   | 119.0    |
| C251-C261-H261 | 120.5     | C272-C282-H282   | 119.0    |
| C271-C261-H261 | 120.1(7)  | C292-C282-H282   | 118.3(6) |
| C281-C271-C261 | 119.9     | C282-C292-C242   | 121.4(6) |
| C281-C271-H271 | 119.9     | C282-C292-C302   | 120.4(6) |
| C261-C271-H271 | 121.8(7)  | C242-C292-C302   | 117.8(6) |
| C271-C281-C291 | 119.1     | C312-C302-C352   | 121.6(6) |
| C271-C281-H281 | 119.1     | C312-C302-C292   | 120.6(6) |
| C291-C281-H281 | 118.3(6)  | C352-C302-C292   | 120.8(7) |
| C241-C291-C281 | 120.4(6)  | C322-C312-C302   | 119.6    |
| C241-C291-C301 | 121.3(6)  | C322-C312-H312   | 119.6    |
| C281-C291-C301 | 118.3(6)  | C302-C312-H312   | 121.3(7) |
| C351-C301-C311 | 120.1(6)  | C312-C322-C332   | 119.3    |
| C351-C301-C291 | 121.5(6)  | C312-C322-H322   | 119.3    |
| C311-C301-C291 | 121.1(7)  | C332-C322-H322   | 118.3(7) |
| C321-C311-C301 | 119.4     | C342-C332-C322   | 120.9    |
| C321-C311-H311 | 119.4     | C342-C332-H332   | 120.9    |
| C301-C311-H311 | 120.5(7)  | C322-C332-H332   | 120.9    |
| C311-C321-C331 | 119.8     | C352-C342-C332   | 120.9(7) |
| C311-C321-H321 | 119.8     | C352-C342-H342   | 119.5    |
| C331-C321-H321 | 119.2(7)  | C332-C342-H342   | 120.6(6) |
| C341-C331-C321 | 120.4     | C342-C352-C302   | 119.6(6) |
| C341-C331-H331 | 120.4     | C342-C352-C362   | 119.7(6) |
| C321-C331-H331 | 120.5(7)  | C302-C352-C362   | 123.0(6) |
| C331-C341-C351 | 119.7     | N112-C362-C232   | 117.3(6) |
| C331-C341-H341 |           | N112-C362-C352   |          |

## SUPPORTING INFORMATION

|                  |          |                  |          |
|------------------|----------|------------------|----------|
| C232-C362-C352   | 119.7(6) | H37A3-C373-H37C3 | 109.5    |
| C172-O372-C372   | 115.9(5) | H37B3-C373-H37C3 | 109.5    |
| O372-C372-H37A2  | 109.5    | C364-N114-C124   | 119.1(6) |
| O372-C372-H37B2  | 109.5    | N134-C124-N114   | 115.6(6) |
| H37A2-C372-H37B2 | 109.5    | N134-C124-C214   | 122.4(6) |
| O372-C372-H37C2  | 109.5    | N114-C124-C214   | 122.0(6) |
| H37A2-C372-H37C2 | 109.5    | C124-N134-C144   | 118.8(6) |
| H37B2-C372-H37C2 | 109.5    | N134-C144-C154   | 119.6(6) |
| C363-N113-C123   | 118.4(5) | N134-C144-C194   | 122.3(6) |
| N133-C123-N113   | 114.7(5) | C154-C144-C194   | 118.0(6) |
| N133-C123-C213   | 121.9(5) | C164-C154-C144   | 120.1(6) |
| N113-C123-C213   | 123.4(6) | C164-C154-H154   | 119.9    |
| C123-N133-C143   | 118.7(5) | C144-C154-H154   | 119.9    |
| N133-C143-C153   | 120.3(6) | C154-C164-C174   | 122.5(7) |
| N133-C143-C193   | 121.8(6) | C154-C164-H164   | 118.8    |
| C153-C143-C193   | 117.9(6) | C174-C164-H164   | 118.8    |
| C163-C153-C143   | 121.2(6) | C184-C174-O374   | 126.4(6) |
| C163-C153-H153   | 119.4    | C184-C174-C164   | 119.1(6) |
| C143-C153-H153   | 119.4    | O374-C174-C164   | 114.5(6) |
| C153-C163-C173   | 121.1(6) | C174-C184-C194   | 121.8(6) |
| C153-C163-H163   | 119.5    | C174-C184-H184   | 119.1    |
| C173-C163-H163   | 119.5    | C194-C184-H184   | 119.1    |
| C183-C173-O373   | 125.8(6) | C204-C194-C184   | 124.2(6) |
| C183-C173-C163   | 119.6(6) | C204-C194-C144   | 117.5(6) |
| O373-C173-C163   | 114.5(6) | C184-C194-C144   | 118.3(6) |
| C173-C183-C193   | 121.3(6) | C194-C204-C214   | 120.7(6) |
| C173-C183-H183   | 119.4    | C194-C204-H204   | 119.6    |
| C193-C183-H183   | 119.4    | C214-C204-H204   | 119.6    |
| C203-C193-C183   | 122.7(6) | C224-C214-C204   | 124.8(6) |
| C203-C193-C143   | 118.5(6) | C224-C214-C124   | 117.0(6) |
| C183-C193-C143   | 118.8(6) | C204-C214-C124   | 118.1(6) |
| C213-C203-C193   | 119.8(6) | C234-C224-C214   | 122.4(6) |
| C213-C203-H203   | 120.1    | C234-C224-H224   | 118.8    |
| C193-C203-H203   | 120.1    | C214-C224-H224   | 118.8    |
| C203-C213-C223   | 125.1(6) | C224-C234-C364   | 116.1(6) |
| C203-C213-C123   | 119.3(6) | C224-C234-C244   | 123.3(6) |
| C223-C213-C123   | 115.6(5) | C364-C234-C244   | 120.6(6) |
| C233-C223-C213   | 122.9(6) | C254-C244-C294   | 119.1(6) |
| C233-C223-H223   | 118.6    | C254-C244-C234   | 121.7(6) |
| C213-C223-H223   | 118.6    | C294-C244-C234   | 119.1(6) |
| C223-C233-C363   | 117.0(5) | C264-C254-C244   | 121.6(7) |
| C223-C233-C243   | 123.9(6) | C264-C254-H254   | 119.2    |
| C363-C233-C243   | 119.1(5) | C244-C254-H254   | 119.2    |
| C253-C243-C293   | 118.0(6) | C254-C264-C274   | 119.5(7) |
| C253-C243-C233   | 121.6(6) | C254-C264-H264   | 120.3    |
| C293-C243-C233   | 120.3(6) | C274-C264-H264   | 120.3    |
| C263-C253-C243   | 121.9(6) | C284-C274-C264   | 119.8(7) |
| C263-C253-H253   | 119.0    | C284-C274-H274   | 120.1    |
| C243-C253-H253   | 119.0    | C264-C274-H274   | 120.1    |
| C253-C263-C273   | 120.1(7) | C274-C284-C294   | 121.9(7) |
| C253-C263-H263   | 119.9    | C274-C284-H284   | 119.0    |
| C273-C263-H263   | 119.9    | C294-C284-H284   | 119.0    |
| C283-C273-C263   | 119.1(7) | C284-C294-C244   | 118.1(6) |
| C283-C273-H273   | 120.5    | C284-C294-C304   | 121.6(6) |
| C263-C273-H273   | 120.5    | C244-C294-C304   | 120.4(6) |
| C273-C283-C293   | 122.3(7) | C354-C304-C314   | 118.3(6) |
| C273-C283-H283   | 118.9    | C354-C304-C294   | 120.0(6) |
| C293-C283-H283   | 118.9    | C314-C304-C294   | 121.7(6) |
| C283-C293-C243   | 118.5(6) | C324-C314-C304   | 121.9(7) |
| C283-C293-C303   | 121.6(6) | C324-C314-H314   | 119.1    |
| C243-C293-C303   | 119.9(6) | C304-C314-H314   | 119.1    |
| C353-C303-C313   | 117.8(6) | C314-C324-C334   | 119.1(7) |
| C353-C303-C293   | 120.6(6) | C314-C324-H324   | 120.4    |
| C313-C303-C293   | 121.6(6) | C334-C324-H324   | 120.4    |
| C323-C313-C303   | 121.4(7) | C344-C334-C324   | 120.5(7) |
| C323-C313-H313   | 119.3    | C344-C334-H334   | 119.7    |
| C303-C313-H313   | 119.3    | C324-C334-H334   | 119.7    |
| C313-C323-C333   | 119.9(7) | C334-C344-C354   | 120.5(7) |
| C313-C323-H323   | 120.1    | C334-C344-H344   | 119.8    |
| C333-C323-H323   | 120.1    | C354-C344-H344   | 119.8    |
| C343-C333-C323   | 120.3(7) | C304-C354-C344   | 119.7(6) |
| C343-C333-H333   | 119.8    | C304-C354-C364   | 120.9(6) |
| C323-C333-H333   | 119.8    | C344-C354-C364   | 119.4(6) |
| C333-C343-C353   | 120.0(7) | N114-C364-C234   | 123.4(6) |
| C333-C343-H343   | 120.0    | N114-C364-C354   | 117.9(6) |
| C353-C343-H343   | 120.0    | C234-C364-C354   | 118.8(6) |
| C343-C353-C303   | 120.6(6) | C174-O374-C374   | 118.1(5) |
| C343-C353-C363   | 119.4(6) | O374-C374-H37A4  | 109.5    |
| C303-C353-C363   | 119.9(6) | O374-C374-H37B4  | 109.5    |
| N113-C363-C233   | 122.8(5) | H37A4-C374-H37B4 | 109.5    |
| N113-C363-C353   | 117.4(5) | O374-C374-H37C4  | 109.5    |
| C233-C363-C353   | 119.8(6) | H37A4-C374-H37C4 | 109.5    |
| C173-O373-C373   | 115.8(5) | H37B4-C374-H37C4 | 109.5    |
| O373-C373-H37A3  | 109.5    | C365-N115-C125   | 117.5(5) |
| O373-C373-H37B3  | 109.5    | N115-C125-N135   | 115.1(6) |
| H37A3-C373-H37B3 | 109.5    | N115-C125-C215   | 121.9(6) |
| O373-C373-H37C3  | 109.5    | N135-C125-C215   | 122.9(6) |



## SUPPORTING INFORMATION

|                  |          |                  |          |
|------------------|----------|------------------|----------|
| C145-N135-C125   | 116.8(5) | C146-C156-H156   | 119.7    |
| N135-C145-C195   | 125.4(6) | C156-C166-C176   | 121.8(7) |
| N135-C145-C155   | 116.6(6) | C156-C166-H166   | 119.1    |
| C195-C145-C155   | 117.9(6) | C176-C166-H166   | 119.1    |
| C165-C155-C145   | 119.4(6) | O376-C176-C186   | 125.7(6) |
| C165-C155-H155   | 120.3    | O376-C176-C166   | 113.7(6) |
| C145-C155-H155   | 120.3    | C186-C176-C166   | 120.6(6) |
| C155-C165-C175   | 122.4(7) | C176-C186-C196   | 119.4(6) |
| C155-C165-H165   | 118.8    | C176-C186-H186   | 120.3    |
| C175-C165-H165   | 118.8    | C196-C186-H186   | 120.3    |
| O375-C175-C185   | 124.9(6) | C206-C196-C186   | 122.4(6) |
| O375-C175-C165   | 114.4(6) | C206-C196-C146   | 117.4(6) |
| C185-C175-C165   | 120.6(6) | C186-C196-C146   | 120.2(6) |
| C175-C185-C195   | 118.4(6) | C216-C206-C196   | 119.4(6) |
| C175-C185-H185   | 120.8    | C216-C206-H206   | 120.3    |
| C195-C185-H185   | 120.8    | C196-C206-H206   | 120.3    |
| C205-C195-C145   | 117.4(6) | C206-C216-C126   | 118.9(6) |
| C205-C195-C185   | 121.4(6) | C206-C216-C226   | 122.5(6) |
| C145-C195-C185   | 121.2(6) | C126-C216-C226   | 118.6(6) |
| C195-C205-C215   | 119.4(6) | C236-C226-C216   | 119.6(6) |
| C195-C205-H205   | 120.3    | C236-C226-H226   | 120.2    |
| C215-C205-H205   | 120.3    | C216-C226-H226   | 120.2    |
| C225-C215-C205   | 123.0(6) | C226-C236-C366   | 117.5(6) |
| C225-C215-C125   | 119.0(6) | C226-C236-C246   | 122.2(6) |
| C205-C215-C125   | 118.0(6) | C366-C236-C246   | 120.3(6) |
| C235-C225-C215   | 119.6(6) | C256-C246-C296   | 120.2(6) |
| C235-C225-H225   | 120.2    | C256-C246-C236   | 120.7(6) |
| C215-C225-H225   | 120.2    | C296-C246-C236   | 119.1(6) |
| C225-C235-C365   | 116.9(6) | C266-C256-C246   | 120.6(7) |
| C225-C235-C245   | 122.8(6) | C266-C256-H256   | 119.7    |
| C365-C235-C245   | 120.3(6) | C246-C256-H256   | 119.7    |
| C255-C245-C295   | 118.6(6) | C256-C266-C276   | 120.2(7) |
| C255-C245-C235   | 121.8(6) | C256-C266-H266   | 119.9    |
| C295-C245-C235   | 119.6(6) | C276-C266-H266   | 119.9    |
| C265-C255-C245   | 121.6(7) | C286-C276-C266   | 119.5(7) |
| C265-C255-H255   | 119.2    | C286-C276-H276   | 120.3    |
| C245-C255-H255   | 119.2    | C266-C276-H276   | 120.3    |
| C255-C265-C275   | 119.6(7) | C276-C286-C296   | 122.8(7) |
| C255-C265-H265   | 120.2    | C276-C286-H286   | 118.6    |
| C275-C265-H265   | 120.2    | C296-C286-H286   | 118.6    |
| C285-C275-C265   | 119.6(7) | C286-C296-C246   | 116.7(6) |
| C285-C275-H275   | 120.2    | C286-C296-C306   | 123.0(6) |
| C265-C275-H275   | 120.2    | C246-C296-C306   | 120.3(6) |
| C275-C285-C295   | 122.8(7) | C356-C306-C316   | 117.0(6) |
| C275-C285-H285   | 118.6    | C356-C306-C296   | 121.3(6) |
| C295-C285-H285   | 118.6    | C316-C306-C296   | 121.7(6) |
| C285-C295-C245   | 117.7(6) | C326-C316-C306   | 121.5(7) |
| C285-C295-C305   | 121.9(6) | C326-C316-H316   | 119.2    |
| C245-C295-C305   | 120.3(6) | C306-C316-H316   | 119.2    |
| C355-C305-C315   | 117.5(6) | C316-C326-C336   | 120.4(7) |
| C355-C305-C295   | 120.1(6) | C316-C326-H326   | 119.8    |
| C315-C305-C295   | 122.4(6) | C336-C326-H326   | 119.8    |
| C325-C315-C305   | 121.3(7) | C326-C336-C346   | 120.6(7) |
| C325-C315-H315   | 119.4    | C326-C336-H336   | 119.7    |
| C305-C315-H315   | 119.4    | C346-C336-H336   | 119.7    |
| C335-C325-C315   | 120.9(7) | C336-C346-C356   | 119.3(7) |
| C335-C325-H325   | 119.6    | C336-C346-H346   | 120.3    |
| C315-C325-H325   | 119.6    | C356-C346-H346   | 120.3    |
| C325-C335-C345   | 119.5(7) | C346-C356-C306   | 121.1(6) |
| C325-C335-H335   | 120.3    | C346-C356-C366   | 119.0(6) |
| C345-C335-H335   | 120.3    | C306-C356-C366   | 119.9(6) |
| C335-C345-C355   | 121.4(7) | N116-C366-C236   | 123.6(6) |
| C335-C345-H345   | 119.3    | N116-C366-C356   | 117.5(6) |
| C355-C345-H345   | 119.3    | C236-C366-C356   | 118.9(6) |
| C345-C355-C305   | 119.4(6) | C176-O376-C376   | 116.6(6) |
| C345-C355-C365   | 119.6(6) | O376-C376-H37A6  | 109.5    |
| C305-C355-C365   | 121.0(6) | O376-C376-H37B6  | 109.5    |
| N115-C365-C235   | 124.9(6) | H37A6-C376-H37B6 | 109.5    |
| N115-C365-C355   | 116.4(6) | O376-C376-H37C6  | 109.5    |
| C235-C365-C355   | 118.6(6) | H37A6-C376-H37C6 | 109.5    |
| C175-O375-C375   | 116.9(6) | H37B6-C376-H37C6 | 109.5    |
| O375-C375-H37A5  | 109.5    | C367-N117-C127   | 118.0(6) |
| O375-C375-H37B5  | 109.5    | N137-C127-N117   | 115.3(6) |
| H37A5-C375-H37B5 | 109.5    | N137-C127-C217   | 123.2(6) |
| O375-C375-H37C5  | 109.5    | N117-C127-C217   | 121.5(6) |
| H37A5-C375-H37C5 | 109.5    | C147-N137-C127   | 117.5(5) |
| H37B5-C375-H37C5 | 109.5    | N137-C147-C197   | 123.8(6) |
| C366-N116-C126   | 118.8(5) | N137-C147-C157   | 118.7(6) |
| N136-C126-N116   | 114.5(6) | C197-C147-C157   | 117.5(6) |
| N136-C126-C216   | 123.6(6) | C167-C157-C147   | 120.6(6) |
| N116-C126-C216   | 121.9(6) | C167-C157-H157   | 119.7    |
| C146-N136-C126   | 116.8(6) | C147-C157-H157   | 119.7    |
| N136-C146-C196   | 123.8(6) | C157-C167-C177   | 121.4(6) |
| N136-C146-C156   | 118.7(6) | C157-C167-H167   | 119.3    |
| C196-C146-C156   | 117.3(6) | C177-C167-H167   | 119.3    |
| C166-C156-C146   | 120.6(7) | O377-C177-C187   | 125.1(6) |
| C166-C156-H156   | 119.7    | O377-C177-C167   | 114.3(6) |

## SUPPORTING INFORMATION

|                  |          |                  |           |
|------------------|----------|------------------|-----------|
| C187-C177-C167   | 120.6(6) | C148-C198-C188   | 120.8(6)  |
| C177-C187-C197   | 119.2(6) | C198-C208-C218   | 119.4(6)  |
| C177-C187-H187   | 120.4    | C198-C208-H208   | 120.3     |
| C197-C187-H187   | 120.4    | C218-C208-H208   | 120.3     |
| C207-C197-C147   | 118.0(6) | C208-C218-C228   | 123.1(6)  |
| C207-C197-C187   | 121.3(6) | C208-C218-C128   | 118.1(6)  |
| C147-C197-C187   | 120.7(6) | C228-C218-C128   | 118.7(6)  |
| C197-C207-C217   | 119.1(6) | C238-C228-C218   | 120.5(6)  |
| C197-C207-H207   | 120.4    | C238-C228-H228   | 119.8     |
| C217-C207-H207   | 120.4    | C218-C228-H228   | 119.8     |
| C227-C217-C207   | 122.8(6) | C228-C238-C368   | 117.0(6)  |
| C227-C217-C127   | 118.8(6) | C228-C238-C248   | 123.2(6)  |
| C207-C217-C127   | 118.4(6) | C368-C238-C248   | 119.7(6)  |
| C237-C227-C217   | 119.9(6) | C258-C248-C298   | 118.3(6)  |
| C237-C227-H227   | 120.0    | C258-C248-C238   | 121.8(6)  |
| C217-C227-H227   | 120.0    | C298-C248-C238   | 119.9(6)  |
| C227-C237-C367   | 116.9(6) | C268-C258-C248   | 121.8(7)  |
| C227-C237-C247   | 122.2(6) | C268-C258-H258   | 119.1     |
| C367-C237-C247   | 120.9(6) | C248-C258-H258   | 119.1     |
| C257-C247-C297   | 119.2(6) | C258-C268-C278   | 120.4(7)  |
| C257-C247-C237   | 121.6(6) | C258-C268-H268   | 119.8     |
| C297-C247-C237   | 119.2(6) | C278-C268-H268   | 119.8     |
| C267-C257-C247   | 121.4(6) | C288-C278-C268   | 118.8(7)  |
| C267-C257-H257   | 119.3    | C288-C278-H278   | 120.6     |
| C247-C257-H257   | 119.3    | C268-C278-H278   | 120.6     |
| C277-C267-C257   | 119.7(7) | C278-C288-C298   | 122.6(7)  |
| C277-C267-H267   | 120.2    | C278-C288-H288   | 118.7     |
| C257-C267-H267   | 120.2    | C298-C288-H288   | 118.7     |
| C287-C277-C267   | 120.0(7) | C288-C298-C248   | 117.7(6)  |
| C287-C277-H277   | 120.0    | C288-C298-C308   | 121.9(6)  |
| C267-C277-H277   | 120.0    | C248-C298-C308   | 120.4(6)  |
| C277-C287-C297   | 121.8(7) | C318-C308-C358   | 117.4(6)  |
| C277-C287-H287   | 119.1    | C318-C308-C298   | 122.6(6)  |
| C297-C287-H287   | 119.1    | C358-C308-C298   | 120.1(6)  |
| C287-C297-C247   | 117.7(6) | C328-C318-C308   | 121.9(7)  |
| C287-C297-C307   | 121.5(6) | C328-C318-H318   | 119.1     |
| C247-C297-C307   | 120.8(6) | C308-C318-H318   | 119.1     |
| C317-C307-C357   | 117.0(6) | C318-C328-C338   | 120.2(7)  |
| C317-C307-C297   | 123.3(7) | C318-C328-H328   | 119.9     |
| C357-C307-C297   | 119.7(6) | C338-C328-H328   | 119.9     |
| C327-C317-C307   | 123.1(7) | C328-C338-C348   | 120.7(7)  |
| C327-C317-H317   | 118.5    | C328-C338-H338   | 119.7     |
| C307-C317-H317   | 118.5    | C348-C338-H338   | 119.7     |
| C317-C327-C337   | 119.2(7) | C338-C348-C358   | 120.0(7)  |
| C317-C327-H327   | 120.4    | C338-C348-H348   | 120.0     |
| C337-C327-H327   | 120.4    | C358-C348-H348   | 120.0     |
| C347-C337-C327   | 119.9(7) | C348-C358-C308   | 119.8(6)  |
| C347-C337-H337   | 120.0    | C348-C358-C368   | 120.3(6)  |
| C327-C337-H337   | 120.0    | C308-C358-C368   | 119.9(6)  |
| C337-C347-C357   | 121.7(7) | N118-C368-C238   | 124.2(6)  |
| C337-C347-H347   | 119.2    | N118-C368-C358   | 116.0(5)  |
| C357-C347-H347   | 119.2    | C238-C368-C358   | 119.7(6)  |
| C347-C357-C307   | 119.1(6) | C178-O378-C378   | 116.4(6)  |
| C347-C357-C367   | 119.7(6) | O378-C378-H37A8  | 109.5     |
| C307-C357-C367   | 121.2(6) | O378-C378-H37B8  | 109.5     |
| N117-C367-C237   | 124.9(6) | H37A8-C378-H37B8 | 109.5     |
| N117-C367-C357   | 117.0(6) | O378-C378-H37C8  | 109.5     |
| C237-C367-C357   | 118.2(6) | H37A8-C378-H37C8 | 109.5     |
| C177-O377-C377   | 115.7(5) | H37B8-C378-H37C8 | 109.5     |
| O377-C377-H37A7  | 109.5    | CI1-C41-CI2      | 108.9(8)  |
| O377-C377-H37B7  | 109.5    | CI1-C41-CI3      | 107.0(7)  |
| H37A7-C377-H37B7 | 109.5    | CI2-C41-CI3      | 114.7(9)  |
| O377-C377-H37C7  | 109.5    | CI1-C41-H41      | 108.7     |
| H37A7-C377-H37C7 | 109.5    | CI2-C41-H41      | 108.7     |
| H37B7-C377-H37C7 | 109.5    | CI3-C41-H41      | 108.7     |
| C368-N118-C128   | 118.2(5) | CI31-C41B-CI32   | 107.2(17) |
| N138-C128-N118   | 115.5(5) | CI31-C41B-CI33   | 98.7(18)  |
| N138-C128-C218   | 123.3(6) | CI32-C41B-CI33   | 104.6(17) |
| N118-C128-C218   | 121.2(6) | CI31-C41B-H41B   | 114.9     |
| C148-N138-C128   | 116.6(5) | CI32-C41B-H41B   | 114.9     |
| N138-C148-C198   | 125.2(6) | CI33-C41B-H41B   | 114.9     |
| N138-C148-C158   | 117.6(6) | CI6-C42-CI5      | 109.8(6)  |
| C198-C148-C158   | 117.1(6) | CI6-C42-CI4      | 112.3(7)  |
| C168-C158-C148   | 119.9(6) | CI5-C42-CI4      | 110.9(7)  |
| C168-C158-H158   | 120.0    | CI6-C42-H42      | 107.9     |
| C148-C158-H158   | 120.0    | CI5-C42-H42      | 107.9     |
| C158-C168-C178   | 122.3(6) | CI4-C42-H42      | 107.9     |
| C158-C168-H168   | 118.9    | CI35-C42B-CI36   | 107(2)    |
| C178-C168-H168   | 118.9    | CI35-C42B-CI34   | 114(2)    |
| O378-C178-C188   | 124.4(6) | CI36-C42B-CI34   | 102.4(17) |
| O378-C178-C168   | 115.4(6) | CI35-C42B-H42B   | 110.9     |
| C188-C178-C168   | 120.2(6) | CI36-C42B-H42B   | 110.9     |
| C178-C188-C198   | 119.7(6) | CI34-C42B-H42B   | 110.9     |
| C178-C188-H188   | 120.2    | CI8-C43-CI9      | 108.1(12) |
| C198-C188-H188   | 120.2    | CI8-C43-CI7      | 112.2(14) |
| C208-C198-C148   | 117.3(6) | CI9-C43-CI7      | 108.6(12) |
| C208-C198-C188   | 121.9(6) | CI8-C43-H43      | 109.3     |

## SUPPORTING INFORMATION

|                |           |
|----------------|-----------|
| CI9-C43-H43    | 109.3     |
| CI7-C43-H43    | 109.3     |
| CI38-C43B-CI39 | 105.9(14) |
| CI38-C43B-CI37 | 120.4(19) |
| CI39-C43B-CI37 | 104.7(14) |
| CI38-C43B-H43B | 108.4     |
| CI39-C43B-H43B | 108.4     |
| CI37-C43B-H43B | 108.4     |
| CI11-C44-CI12  | 106.7(8)  |
| CI11-C44-CI10  | 110.8(8)  |
| CI12-C44-CI10  | 113.7(8)  |
| CI11-C44-H44   | 108.5     |
| CI12-C44-H44   | 108.5     |
| CI10-C44-H44   | 108.5     |
| CI41-C44B-CI42 | 105.0(15) |
| CI41-C44B-CI40 | 131(2)    |
| CI42-C44B-CI40 | 102.2(14) |
| CI41-C44B-H44B | 105.5     |
| CI42-C44B-H44B | 105.5     |
| CI40-C44B-H44B | 105.5     |
| CI14-C45-CI15  | 111.0(6)  |
| CI14-C45-CI13  | 109.8(6)  |
| CI15-C45-CI13  | 112.1(6)  |
| CI14-C45-H45   | 107.9     |
| CI15-C45-H45   | 107.9     |
| CI13-C45-H45   | 107.9     |
| CI44-C45B-CI45 | 109.3(15) |
| CI44-C45B-CI43 | 123.1(18) |
| CI45-C45B-CI43 | 101.4(15) |
| CI44-C45B-H45B | 107.4     |
| CI45-C45B-H45B | 107.4     |
| CI43-C45B-H45B | 107.4     |
| CI17-C46-CI18  | 111.2(9)  |
| CI17-C46-CI16  | 102.9(7)  |
| CI18-C46-CI16  | 108.2(8)  |
| CI17-C46-H46   | 111.4     |
| CI18-C46-H46   | 111.4     |
| CI16-C46-H46   | 111.4     |
| CI47-C46B-CI48 | 99.4(15)  |
| CI47-C46B-CI46 | 135(3)    |
| CI48-C46B-CI46 | 105.2(17) |
| CI47-C46B-H46B | 104.8     |
| CI48-C46B-H46B | 104.8     |
| CI46-C46B-H46B | 104.8     |
| CI21-C47-CI20  | 110.5(9)  |
| CI21-C47-CI19  | 108.8(8)  |
| CI20-C47-CI19  | 109.5(9)  |
| CI21-C47-H47   | 109.3     |
| CI20-C47-H47   | 109.3     |
| CI19-C47-H47   | 109.3     |
| CI50-C47B-CI51 | 118(2)    |
| CI50-C47B-CI49 | 107.8(15) |
| CI51-C47B-CI49 | 105.7(16) |
| CI50-C47B-H47B | 108.2     |
| CI51-C47B-H47B | 108.2     |
| CI49-C47B-H47B | 108.2     |
| CI24-C48-CI22  | 108.8(9)  |
| CI24-C48-CI23  | 110.1(9)  |
| CI22-C48-CI23  | 111.5(11) |
| CI24-C48-H48   | 108.8     |
| CI22-C48-H48   | 108.8     |
| CI23-C48-H48   | 108.8     |
| CI53-C48B-CI54 | 106.4(15) |
| CI53-C48B-CI52 | 111.5(14) |
| CI54-C48B-CI52 | 105.5(12) |
| CI53-C48B-H48B | 111.1     |
| CI54-C48B-H48B | 111.1     |
| CI52-C48B-H48B | 111.1     |

## SUPPORTING INFORMATION

## 6.6. Compound 5h

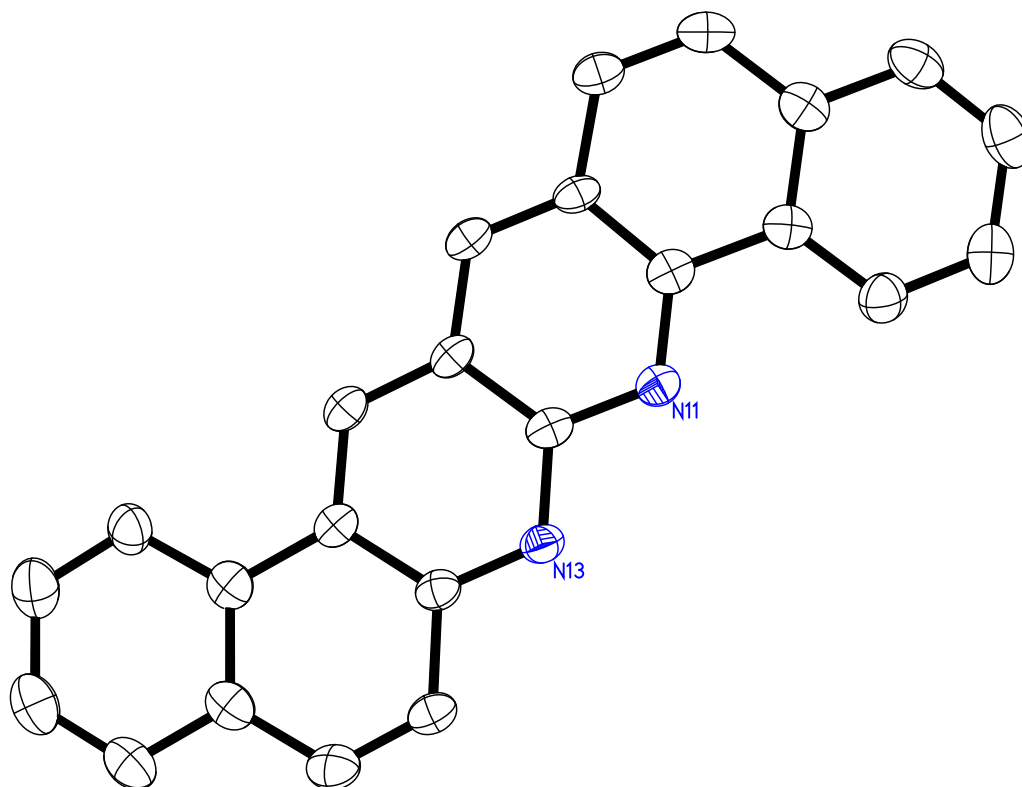

Figure S13: X-ray crystal structure of 5h.

Table S27: Crystal data and structure refinement for 5h.

|                                 |                                                                |                                                   |
|---------------------------------|----------------------------------------------------------------|---------------------------------------------------|
| Identification code             | stu12                                                          |                                                   |
| Empirical formula               | C <sub>25</sub> H <sub>15</sub> Cl <sub>3</sub> N <sub>2</sub> |                                                   |
| Formula weight                  | 449.74                                                         |                                                   |
| Temperature                     | 200(2) K                                                       |                                                   |
| Wavelength                      | 0.71073 Å                                                      |                                                   |
| Crystal system                  | monoclinic                                                     |                                                   |
| Space group                     | C2/c                                                           |                                                   |
| Z                               | 8                                                              |                                                   |
| Unit cell dimensions            | a = 31.6523(13) Å<br>b = 7.2389(3) Å<br>c = 22.7804(10) Å      | α = 90 deg.<br>β = 127.995(2) deg.<br>γ = 90 deg. |
| Volume                          | 4113.4(3) Å <sup>3</sup>                                       |                                                   |
| Density (calculated)            | 1.45 g/cm <sup>3</sup>                                         |                                                   |
| Absorption coefficient          | 0.46 mm <sup>-1</sup>                                          |                                                   |
| Crystal shape                   | plank                                                          |                                                   |
| Crystal size                    | 0.295 x 0.071 x 0.030 mm <sup>3</sup>                          |                                                   |
| Crystal colour                  | yellow                                                         |                                                   |
| Theta range for data collection | 1.6 to 25.0 deg.                                               |                                                   |
| Index ranges                    | -37 ≤ h ≤ 37, -8 ≤ k ≤ 8, -27 ≤ l ≤ 21                         |                                                   |
| Reflections collected           | 18628                                                          |                                                   |
| Independent reflections         | 3612 (R(int) = 0.0820)                                         |                                                   |
| Observed reflections            | 2142 (I > 2σ(I))                                               |                                                   |
| Absorption correction           | Semi-empirical from equivalents                                |                                                   |
| Max. and min. transmission      | 0.96 and 0.82                                                  |                                                   |

## SUPPORTING INFORMATION

|                                      |                                    |
|--------------------------------------|------------------------------------|
| Refinement method                    | Full-matrix least-squares on $F^2$ |
| Data/restraints/parameters           | 3612 / 0 / 271                     |
| Goodness-of-fit on $F^2$             | 1.02                               |
| Final R indices ( $I > 2\sigma(I)$ ) | R1 = 0.055, wR2 = 0.119            |
| Largest diff. peak and hole          | 0.40 and -0.41 eÅ <sup>-3</sup>    |

**Table S28:** Atomic coordinates and equivalent isotropic displacement parameters (Å<sup>2</sup>) for **5h**.  $U_{eq}$  is defined as one third of the trace of the orthogonalized  $U_{ij}$  tensor.

| Atom | x         | y         | z         | $U_{eq}$   |
|------|-----------|-----------|-----------|------------|
| N11  | 0.6757(1) | 0.4994(4) | 0.4014(1) | 0.0253(7)  |
| C12  | 0.7201(1) | 0.5628(4) | 0.4110(2) | 0.0250(8)  |
| N13  | 0.7111(1) | 0.6285(4) | 0.3486(1) | 0.0260(7)  |
| C14  | 0.7536(1) | 0.6886(5) | 0.3543(2) | 0.0256(8)  |
| C15  | 0.7430(1) | 0.7574(5) | 0.2873(2) | 0.0300(8)  |
| H15  | 0.7071    | 0.7611    | 0.2426    | 0.036      |
| C16  | 0.7829(1) | 0.8162(5) | 0.2867(2) | 0.0337(9)  |
| H16  | 0.7745    | 0.8602    | 0.2414    | 0.040      |
| C17  | 0.8378(1) | 0.8151(5) | 0.3523(2) | 0.0312(9)  |
| C18  | 0.8789(2) | 0.8769(5) | 0.3499(2) | 0.0398(10) |
| H18  | 0.8703    | 0.9204    | 0.3044    | 0.048      |
| C19  | 0.9311(2) | 0.8747(5) | 0.4130(2) | 0.0436(10) |
| H19  | 0.9587    | 0.9162    | 0.4110    | 0.052      |
| C20  | 0.9440(2) | 0.8122(5) | 0.4799(2) | 0.0449(10) |
| H20  | 0.9804    | 0.8108    | 0.5232    | 0.054      |
| C21  | 0.9048(1) | 0.7524(5) | 0.4841(2) | 0.0357(9)  |
| H21  | 0.9143    | 0.7113    | 0.5304    | 0.043      |
| C22  | 0.8509(1) | 0.7514(4) | 0.4206(2) | 0.0286(8)  |
| C23  | 0.8076(1) | 0.6868(4) | 0.4219(2) | 0.0235(8)  |
| C24  | 0.8155(1) | 0.6229(4) | 0.4851(2) | 0.0265(8)  |
| H24  | 0.8506    | 0.6218    | 0.5313    | 0.032      |
| C25  | 0.7720(1) | 0.5595(4) | 0.4816(2) | 0.0236(8)  |
| C26  | 0.7767(1) | 0.4928(4) | 0.5431(2) | 0.0263(8)  |
| H26  | 0.8108    | 0.4900    | 0.5908    | 0.032      |
| C27  | 0.7322(1) | 0.4312(4) | 0.5344(2) | 0.0244(8)  |
| C28  | 0.7346(1) | 0.3649(5) | 0.5959(2) | 0.0308(8)  |
| H28  | 0.7679    | 0.3648    | 0.6447    | 0.037      |
| C29  | 0.6903(1) | 0.3031(5) | 0.5853(2) | 0.0332(9)  |
| H29  | 0.6928    | 0.2643    | 0.6272    | 0.040      |
| C30  | 0.6392(1) | 0.2938(5) | 0.5123(2) | 0.0305(9)  |
| C31  | 0.5941(2) | 0.2163(5) | 0.5012(2) | 0.0373(9)  |
| H31  | 0.5967    | 0.1750    | 0.5428    | 0.045      |
| C32  | 0.5465(2) | 0.1996(5) | 0.4311(2) | 0.0425(10) |
| H32  | 0.5165    | 0.1443    | 0.4244    | 0.051      |
| C33  | 0.5419(2) | 0.2634(5) | 0.3698(2) | 0.0400(10) |
| H33  | 0.5088    | 0.2515    | 0.3212    | 0.048      |
| C34  | 0.5851(1) | 0.3437(5) | 0.3795(2) | 0.0356(9)  |
| H34  | 0.5812    | 0.3894    | 0.3373    | 0.043      |
| C35  | 0.6344(1) | 0.3593(4) | 0.4497(2) | 0.0274(8)  |
| C36  | 0.6818(1) | 0.4342(4) | 0.4612(2) | 0.0254(8)  |
| C41  | 0.5880(2) | 0.7898(6) | 0.2463(2) | 0.0489(11) |
| H41  | 0.6213    | 0.7159    | 0.2814    | 0.059      |
| Cl1  | 0.5950(1) | 0.9181(2) | 0.1879(1) | 0.1018(6)  |
| Cl2  | 0.5334(1) | 0.6399(2) | 0.1932(1) | 0.0663(4)  |
| Cl3  | 0.5772(1) | 0.9351(2) | 0.2977(1) | 0.0833(5)  |

**Table S29:** Hydrogen coordinates and isotropic displacement parameters (Å<sup>2</sup>) for **5h**.

| Atom | x      | y      | z      | $U_{eq}$ |
|------|--------|--------|--------|----------|
| H15  | 0.7071 | 0.7611 | 0.2426 | 0.036    |
| H16  | 0.7745 | 0.8602 | 0.2414 | 0.040    |
| H18  | 0.8703 | 0.9204 | 0.3044 | 0.048    |
| H19  | 0.9587 | 0.9162 | 0.4110 | 0.052    |
| H20  | 0.9804 | 0.8108 | 0.5232 | 0.054    |
| H21  | 0.9143 | 0.7113 | 0.5304 | 0.043    |
| H24  | 0.8506 | 0.6218 | 0.5313 | 0.032    |
| H26  | 0.8108 | 0.4900 | 0.5908 | 0.032    |
| H28  | 0.7679 | 0.3648 | 0.6447 | 0.037    |
| H29  | 0.6928 | 0.2643 | 0.6272 | 0.040    |
| H31  | 0.5967 | 0.1750 | 0.5428 | 0.045    |
| H32  | 0.5165 | 0.1443 | 0.4244 | 0.051    |
| H33  | 0.5088 | 0.2515 | 0.3212 | 0.048    |
| H34  | 0.5812 | 0.3894 | 0.3373 | 0.043    |
| H41  | 0.6213 | 0.7159 | 0.2814 | 0.059    |

## SUPPORTING INFORMATION

**Table S30:** Anisotropic displacement parameters ( $\text{\AA}^2$ ) for **5h**. The anisotropic displacement factor exponent takes the form:  $-2\pi^2(h^2 a^2 U_{11} + \dots + 2 h k a^* b^* U_{12})$ 

| Atom | $U_{11}$   | $U_{22}$   | $U_{33}$   | $U_{23}$    | $U_{13}$   | $U_{12}$    |
|------|------------|------------|------------|-------------|------------|-------------|
| N11  | 0.0269(16) | 0.0244(16) | 0.0237(15) | -0.0008(13) | 0.0150(13) | 0.0017(12)  |
| C12  | 0.029(2)   | 0.0230(19) | 0.0219(18) | -0.0002(15) | 0.0148(17) | 0.0052(15)  |
| N13  | 0.0266(16) | 0.0291(17) | 0.0202(15) | 0.0006(13)  | 0.0133(14) | 0.0004(13)  |
| C14  | 0.030(2)   | 0.024(2)   | 0.0218(18) | -0.0028(15) | 0.0149(17) | -0.0004(15) |
| C15  | 0.032(2)   | 0.033(2)   | 0.0210(18) | -0.0013(16) | 0.0142(17) | 0.0008(16)  |
| C16  | 0.044(2)   | 0.032(2)   | 0.027(2)   | -0.0045(17) | 0.023(2)   | -0.0014(17) |
| C17  | 0.040(2)   | 0.022(2)   | 0.039(2)   | -0.0026(17) | 0.028(2)   | -0.0005(16) |
| C18  | 0.049(3)   | 0.032(2)   | 0.049(3)   | -0.0008(19) | 0.036(2)   | -0.0046(18) |
| C19  | 0.042(3)   | 0.039(3)   | 0.060(3)   | -0.004(2)   | 0.037(2)   | -0.0042(19) |
| C20  | 0.035(2)   | 0.040(3)   | 0.055(3)   | 0.002(2)    | 0.025(2)   | -0.0017(19) |
| C21  | 0.033(2)   | 0.030(2)   | 0.039(2)   | 0.0015(18)  | 0.020(2)   | -0.0035(17) |
| C22  | 0.035(2)   | 0.0151(19) | 0.035(2)   | -0.0026(15) | 0.0209(19) | 0.0000(15)  |
| C23  | 0.0259(19) | 0.0178(19) | 0.0232(18) | -0.0028(15) | 0.0133(17) | 0.0033(14)  |
| C24  | 0.0265(19) | 0.023(2)   | 0.0233(19) | -0.0032(15) | 0.0119(16) | 0.0019(15)  |
| C25  | 0.0249(19) | 0.0191(19) | 0.0201(18) | -0.0033(15) | 0.0104(16) | 0.0022(14)  |
| C26  | 0.028(2)   | 0.022(2)   | 0.0203(18) | -0.0012(15) | 0.0108(16) | 0.0030(15)  |
| C27  | 0.029(2)   | 0.024(2)   | 0.0185(18) | -0.0024(15) | 0.0138(16) | 0.0038(15)  |
| C28  | 0.036(2)   | 0.029(2)   | 0.0256(19) | -0.0007(16) | 0.0182(18) | 0.0026(16)  |
| C29  | 0.046(2)   | 0.030(2)   | 0.029(2)   | 0.0033(16)  | 0.026(2)   | 0.0056(17)  |
| C30  | 0.037(2)   | 0.023(2)   | 0.038(2)   | -0.0006(17) | 0.0269(19) | 0.0051(16)  |
| C31  | 0.047(3)   | 0.032(2)   | 0.046(2)   | 0.0071(19)  | 0.036(2)   | 0.0087(18)  |
| C32  | 0.041(3)   | 0.032(2)   | 0.064(3)   | 0.003(2)    | 0.037(2)   | 0.0020(18)  |
| C33  | 0.032(2)   | 0.038(2)   | 0.047(2)   | -0.004(2)   | 0.022(2)   | -0.0015(18) |
| C34  | 0.032(2)   | 0.039(2)   | 0.034(2)   | 0.0019(18)  | 0.020(2)   | 0.0057(17)  |
| C35  | 0.034(2)   | 0.022(2)   | 0.031(2)   | 0.0006(16)  | 0.0215(18) | 0.0051(15)  |
| C36  | 0.031(2)   | 0.0171(19) | 0.028(2)   | -0.0016(15) | 0.0178(17) | 0.0046(15)  |
| C41  | 0.037(2)   | 0.050(3)   | 0.047(2)   | -0.002(2)   | 0.020(2)   | 0.004(2)    |
| Cl1  | 0.0801(10) | 0.1002(12) | 0.1396(14) | 0.0583(10)  | 0.0749(10) | 0.0234(8)   |
| Cl2  | 0.0575(8)  | 0.0737(9)  | 0.0535(7)  | -0.0203(6)  | 0.0270(6)  | -0.0175(6)  |
| Cl3  | 0.0474(7)  | 0.0927(10) | 0.0624(8)  | -0.0343(7)  | 0.0099(6)  | 0.0142(7)   |

**Table S31:** Bond lengths ( $\text{\AA}$ ) and angles (deg) for **5h**.

|         |          |
|---------|----------|
| N11-C36 | 1.337(4) |
| N11-C12 | 1.362(4) |
| C12-N13 | 1.352(4) |
| C12-C25 | 1.427(4) |
| N13-C14 | 1.340(4) |
| C14-C23 | 1.433(4) |
| C14-C15 | 1.437(4) |
| C15-C16 | 1.338(5) |
| C15-H15 | 0.9500   |
| C16-C17 | 1.434(5) |
| C16-H16 | 0.9500   |
| C17-C18 | 1.407(5) |
| C17-C22 | 1.419(5) |
| C18-C19 | 1.369(5) |
| C18-H18 | 0.9500   |
| C19-C20 | 1.387(5) |
| C19-H19 | 0.9500   |
| C20-C21 | 1.372(5) |
| C20-H20 | 0.9500   |
| C21-C22 | 1.401(5) |
| C21-H21 | 0.9500   |
| C22-C23 | 1.464(4) |
| C23-C24 | 1.380(4) |
| C24-C25 | 1.406(4) |
| C24-H24 | 0.9500   |
| C25-C26 | 1.400(4) |
| C26-C27 | 1.374(4) |
| C26-H26 | 0.9500   |
| C27-C36 | 1.432(4) |
| C27-C28 | 1.438(4) |
| C28-C29 | 1.343(5) |
| C28-H28 | 0.9500   |
| C29-C30 | 1.442(5) |
| C29-H29 | 0.9500   |
| C30-C31 | 1.403(5) |
| C30-C35 | 1.418(4) |
| C31-C32 | 1.368(5) |
| C31-H31 | 0.9500   |
| C32-C33 | 1.392(5) |

## SUPPORTING INFORMATION

---

|             |          |
|-------------|----------|
| C32-H32     | 0.9500   |
| C33-C34     | 1.373(5) |
| C33-H33     | 0.9500   |
| C34-C35     | 1.391(5) |
| C34-H34     | 0.9500   |
| C35-C36     | 1.461(5) |
| C41-C11     | 1.744(4) |
| C41-C12     | 1.747(4) |
| C41-C13     | 1.757(4) |
| C41-H41     | 1.0000   |
| C36-N11-C12 | 117.9(3) |
| N13-C12-N11 | 115.0(3) |
| N13-C12-C25 | 122.7(3) |
| N11-C12-C25 | 122.3(3) |
| C14-N13-C12 | 117.6(3) |
| N13-C14-C23 | 124.3(3) |
| N13-C14-C15 | 116.5(3) |
| C23-C14-C15 | 119.2(3) |
| C16-C15-C14 | 121.0(3) |
| C16-C15-H15 | 119.5    |
| C14-C15-H15 | 119.5    |
| C15-C16-C17 | 122.3(3) |
| C15-C16-H16 | 118.9    |
| C17-C16-H16 | 118.9    |
| C18-C17-C22 | 119.5(3) |
| C18-C17-C16 | 121.0(3) |
| C22-C17-C16 | 119.5(3) |
| C19-C18-C17 | 120.2(4) |
| C19-C18-H18 | 119.9    |
| C17-C18-H18 | 119.9    |
| C18-C19-C20 | 120.4(4) |
| C18-C19-H19 | 119.8    |
| C20-C19-H19 | 119.8    |
| C21-C20-C19 | 120.8(4) |
| C21-C20-H20 | 119.6    |
| C19-C20-H20 | 119.6    |
| C20-C21-C22 | 120.6(4) |
| C20-C21-H21 | 119.7    |
| C22-C21-H21 | 119.7    |
| C21-C22-C17 | 118.5(3) |
| C21-C22-C23 | 122.8(3) |
| C17-C22-C23 | 118.7(3) |
| C24-C23-C14 | 117.0(3) |
| C24-C23-C22 | 123.8(3) |
| C14-C23-C22 | 119.2(3) |
| C23-C24-C25 | 120.5(3) |
| C23-C24-H24 | 119.8    |
| C25-C24-H24 | 119.8    |
| C26-C25-C24 | 123.9(3) |
| C26-C25-C12 | 118.2(3) |
| C24-C25-C12 | 117.9(3) |
| C27-C26-C25 | 120.1(3) |
| C27-C26-H26 | 120.0    |
| C25-C26-H26 | 120.0    |
| C26-C27-C36 | 118.0(3) |
| C26-C27-C28 | 122.4(3) |
| C36-C27-C28 | 119.6(3) |
| C29-C28-C27 | 120.8(3) |
| C29-C28-H28 | 119.6    |
| C27-C28-H28 | 119.6    |
| C28-C29-C30 | 122.0(3) |
| C28-C29-H29 | 119.0    |
| C30-C29-H29 | 119.0    |
| C31-C30-C35 | 119.0(3) |
| C31-C30-C29 | 121.4(3) |
| C35-C30-C29 | 119.5(3) |
| C32-C31-C30 | 120.9(3) |
| C32-C31-H31 | 119.6    |
| C30-C31-H31 | 119.6    |
| C31-C32-C33 | 120.1(4) |
| C31-C32-H32 | 120.0    |
| C33-C32-H32 | 120.0    |
| C34-C33-C32 | 120.1(4) |
| C34-C33-H33 | 120.0    |
| C32-C33-H33 | 120.0    |
| C33-C34-C35 | 121.3(3) |
| C33-C34-H34 | 119.3    |
| C35-C34-H34 | 119.3    |
| C34-C35-C30 | 118.6(3) |
| C34-C35-C36 | 122.5(3) |
| C30-C35-C36 | 118.8(3) |
| N11-C36-C27 | 123.5(3) |
| N11-C36-C35 | 117.4(3) |
| C27-C36-C35 | 119.1(3) |
| C11-C41-C12 | 109.8(2) |
| C11-C41-C13 | 110.9(2) |

## SUPPORTING INFORMATION

|             |          |
|-------------|----------|
| Cl2-C41-Cl3 | 108.5(2) |
| Cl1-C41-H41 | 109.2    |
| Cl2-C41-H41 | 109.2    |
| Cl3-C41-H41 | 109.2    |

## 7. Computational Data of 5a-h and 11a and 11b

All geometry optimizations, subsequent frequency analyses, and TD-DFT calculations were performed in with the CPCM model for chloroform using Orca 4.0.1.2<sup>[6]</sup> on the bwForCluster Justus 2. The B3LYP<sup>[7]</sup> functional and the 6-311G<sup>[8]</sup> basis set was employed.

xyz-files

5a

Charge 0, Multiplicity 1

```

6 -5.780176000 1.099622000 0.000000000
6 -5.888942000 -0.291522000 0.000000000
6 -4.510457000 1.712799000 0.000000000
6 -4.739852000 -1.122441000 0.000000000
6 -3.461734000 -0.490779000 0.000000000
6 -3.364727000 0.921052000 0.000000000
6 -2.237804000 -1.294602000 0.000000000
6 -2.327513000 -2.744895000 0.000000000
6 -4.834609000 -2.593198000 0.000000000
6 -3.646933000 -3.392088000 0.000000000
6 -3.772211000 -4.804135000 0.000000000
6 -6.089293000 -3.253121000 0.000000000
6 -6.187472000 -4.643508000 0.000000000
6 -5.018226000 -5.427664000 0.000000000
7 -1.069386000 -0.626509000 0.000000000
6 0.113013000 -1.323642000 0.000000000
6 -1.128235000 -3.451543000 0.000000000
6 0.121032000 -2.777402000 0.000000000
7 1.258245000 -0.586139000 0.000000000
6 2.450795000 -1.247867000 0.000000000
6 2.555790000 -2.702149000 0.000000000
6 1.362706000 -3.442233000 0.000000000
6 3.653257000 -0.471843000 0.000000000
6 4.888161000 -1.089304000 0.000000000
6 4.991945000 -2.518090000 0.000000000
6 3.856985000 -3.303671000 0.000000000
1 5.798612000 -0.489437000 0.000000000
1 5.978658000 -2.982114000 0.000000000
1 3.540007000 0.611530000 0.000000000
1 3.932577000 -4.393407000 0.000000000
1 1.396425000 -4.535545000 0.000000000
1 -1.117832000 -4.542695000 0.000000000
1 -2.364802000 1.351493000 0.000000000
1 -4.425150000 2.800038000 0.000000000
1 -6.683714000 1.710272000 0.000000000
1 -6.882759000 -0.734305000 0.000000000
1 -7.006739000 -2.667374000 0.000000000
1 -7.168587000 -5.119250000 0.000000000
1 -2.878142000 -5.425861000 0.000000000
1 -5.084296000 -6.516245000 0.000000000

```



## SUPPORTING INFORMATION

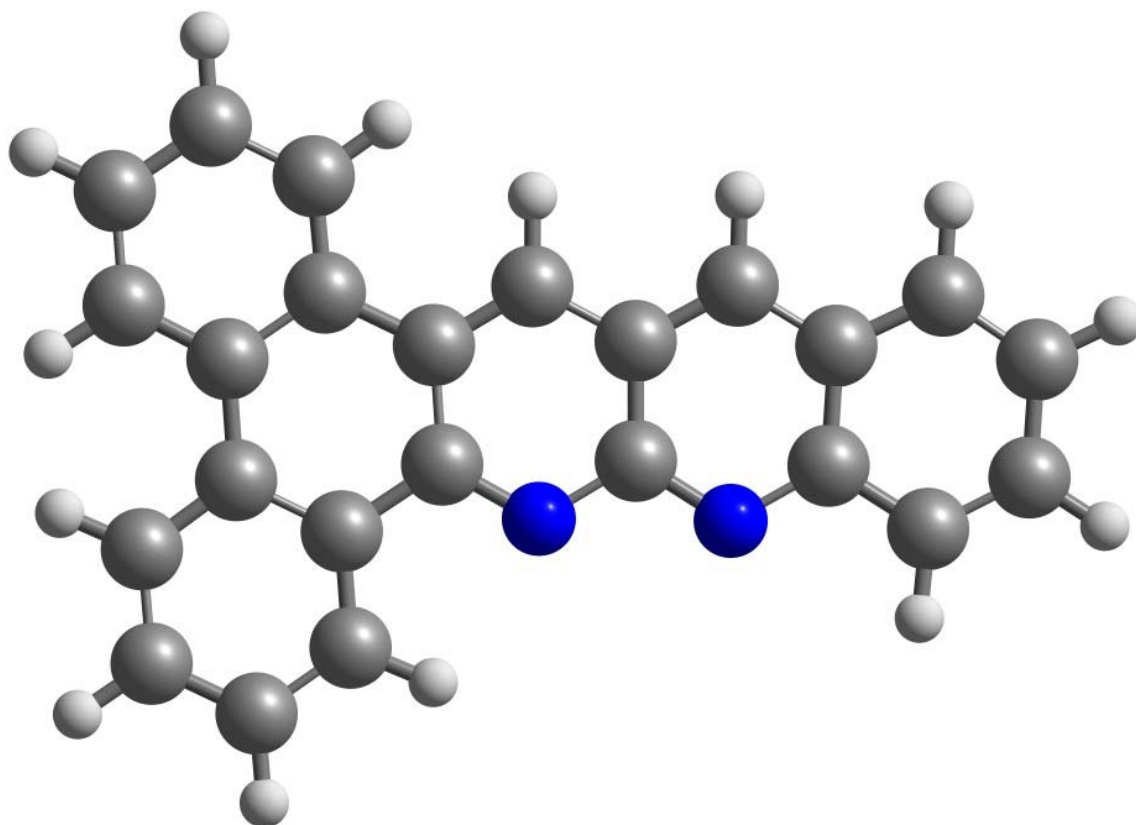**5b**

Charge 0, Multiplicity 1

|   |              |              |             |
|---|--------------|--------------|-------------|
| 6 | -5.787196000 | 1.100495000  | 0.000000000 |
| 6 | -5.895587000 | -0.290720000 | 0.000000000 |
| 6 | -4.517788000 | 1.714196000  | 0.000000000 |
| 6 | -4.746312000 | -1.121150000 | 0.000000000 |
| 6 | -3.468397000 | -0.488977000 | 0.000000000 |
| 6 | -3.371751000 | 0.922929000  | 0.000000000 |
| 6 | -2.244868000 | -1.292554000 | 0.000000000 |
| 6 | -2.333692000 | -2.743430000 | 0.000000000 |
| 6 | -4.840577000 | -2.591929000 | 0.000000000 |
| 6 | -3.652931000 | -3.390802000 | 0.000000000 |
| 6 | -3.777601000 | -4.802889000 | 0.000000000 |
| 6 | -6.095054000 | -3.252114000 | 0.000000000 |
| 6 | -6.192711000 | -4.642538000 | 0.000000000 |
| 6 | -5.023444000 | -5.426625000 | 0.000000000 |
| 7 | -1.076017000 | -0.625033000 | 0.000000000 |
| 6 | 0.104936000  | -1.322779000 | 0.000000000 |
| 6 | -1.134728000 | -3.450297000 | 0.000000000 |
| 6 | 0.114906000  | -2.776086000 | 0.000000000 |
| 7 | 1.251066000  | -0.585733000 | 0.000000000 |
| 6 | 2.441943000  | -1.246655000 | 0.000000000 |
| 6 | 2.548927000  | -2.701900000 | 0.000000000 |
| 6 | 1.355548000  | -3.442317000 | 0.000000000 |
| 6 | 3.642622000  | -0.464057000 | 0.000000000 |
| 6 | 4.881737000  | -1.070833000 | 0.000000000 |
| 6 | 4.950144000  | -2.491010000 | 0.000000000 |
| 6 | 3.847850000  | -3.306960000 | 0.000000000 |
| 1 | 5.806189000  | -0.496542000 | 0.000000000 |
| 9 | 6.234642000  | -3.070632000 | 0.000000000 |
| 1 | 3.527803000  | 0.618521000  | 0.000000000 |
| 1 | 3.959835000  | -4.390790000 | 0.000000000 |
| 1 | 1.388440000  | -4.535117000 | 0.000000000 |
| 1 | -1.124587000 | -4.541281000 | 0.000000000 |
| 1 | -2.372273000 | 1.354298000  | 0.000000000 |
| 1 | -4.432968000 | 2.801419000  | 0.000000000 |
| 1 | -6.690897000 | 1.710811000  | 0.000000000 |
| 1 | -6.889255000 | -0.733712000 | 0.000000000 |
| 1 | -7.012681000 | -2.666754000 | 0.000000000 |
| 1 | -7.173676000 | -5.118488000 | 0.000000000 |
| 1 | -2.883572000 | -5.424612000 | 0.000000000 |
| 1 | -5.089396000 | -6.515142000 | 0.000000000 |

## SUPPORTING INFORMATION

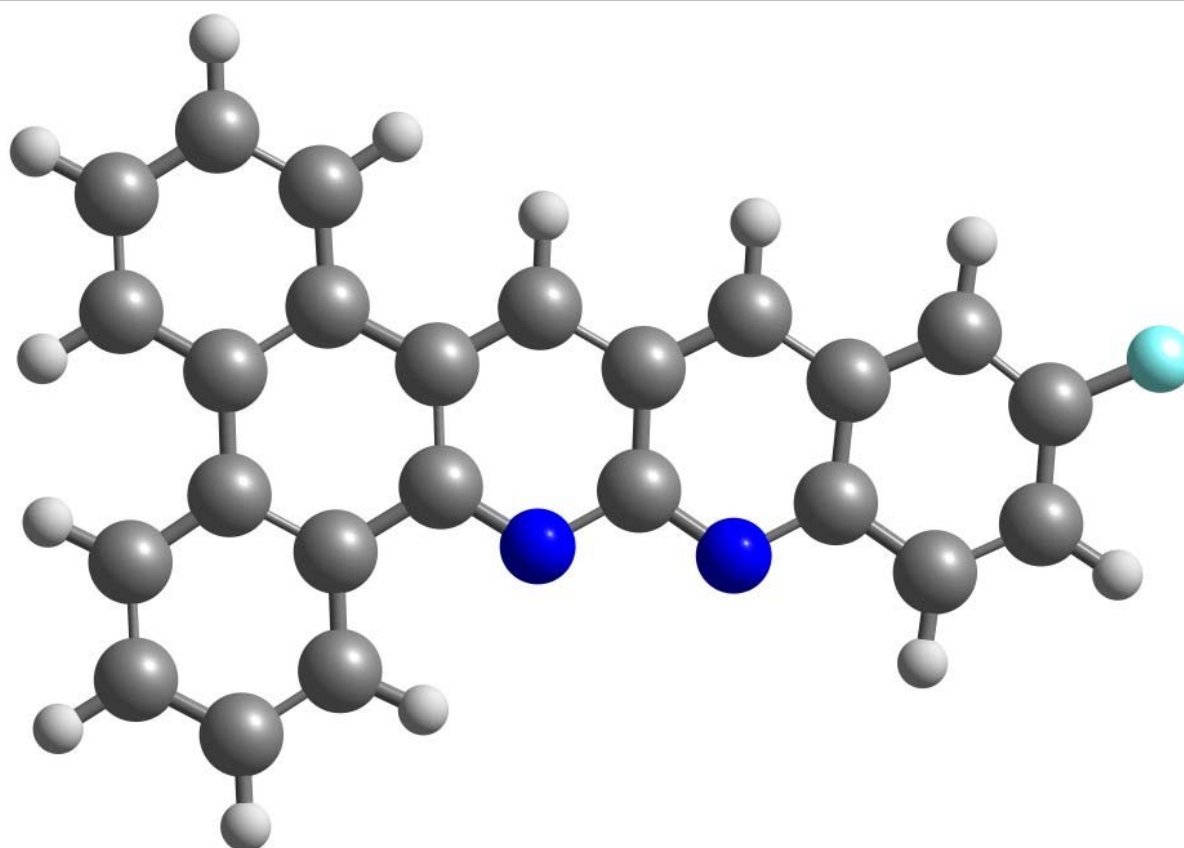

**5c**  
Charge 0; Multiplicity 1

|    |              |              |              |
|----|--------------|--------------|--------------|
| 6  | -5.800118000 | 1.099955000  | 0.000000000  |
| 6  | -5.906865000 | -0.291422000 | 0.000000000  |
| 6  | -4.531532000 | 1.715341000  | 0.000000000  |
| 6  | -4.756640000 | -1.120414000 | 0.000000000  |
| 6  | -3.479485000 | -0.486522000 | 0.000000000  |
| 6  | -3.384509000 | 0.925547000  | 0.000000000  |
| 6  | -2.255172000 | -1.288452000 | 0.000000000  |
| 6  | -2.342216000 | -2.739510000 | 0.000000000  |
| 6  | -4.849111000 | -2.591290000 | 0.000000000  |
| 6  | -3.660501000 | -3.388681000 | 0.000000000  |
| 6  | -3.783219000 | -4.800908000 | 0.000000000  |
| 6  | -6.102729000 | -3.253034000 | 0.000000000  |
| 6  | -6.198522000 | -4.643598000 | 0.000000000  |
| 6  | -5.028271000 | -5.426211000 | 0.000000000  |
| 7  | -1.087035000 | -0.619221000 | 0.000000000  |
| 6  | 0.094719000  | -1.314944000 | 0.000000000  |
| 6  | -1.142302000 | -3.444683000 | 0.000000000  |
| 6  | 0.106284000  | -2.768572000 | 0.000000000  |
| 7  | 1.239872000  | -0.575659000 | 0.000000000  |
| 6  | 2.431143000  | -1.235610000 | 0.000000000  |
| 6  | 2.539109000  | -2.688899000 | 0.000000000  |
| 6  | 1.347854000  | -3.432899000 | 0.000000000  |
| 6  | 3.632396000  | -0.456320000 | 0.000000000  |
| 6  | 4.872000000  | -1.062452000 | 0.000000000  |
| 6  | 4.947939000  | -2.485548000 | 0.000000000  |
| 6  | 3.838161000  | -3.294656000 | 0.000000000  |
| 1  | 5.788232000  | -0.475892000 | 0.000000000  |
| 17 | 6.612202000  | -3.247134000 | -0.000001000 |
| 1  | 3.521426000  | 0.626920000  | 0.000000000  |
| 1  | 3.932464000  | -4.380186000 | 0.000000000  |
| 1  | 1.383350000  | -4.525651000 | 0.000000000  |
| 1  | -1.130556000 | -4.535624000 | 0.000000000  |
| 1  | -2.385664000 | 1.358338000  | 0.000000000  |
| 1  | -4.448116000 | 2.802644000  | 0.000000000  |
| 1  | -6.704578000 | 1.709121000  | 0.000000000  |
| 1  | -6.900026000 | -0.735512000 | 0.000000000  |
| 1  | -7.021159000 | -2.668968000 | 0.000000000  |
| 1  | -7.178850000 | -5.120817000 | 0.000000000  |
| 1  | -2.888474000 | -5.421595000 | 0.000000000  |
| 1  | -5.092839000 | -6.514789000 | 0.000000000  |

## SUPPORTING INFORMATION

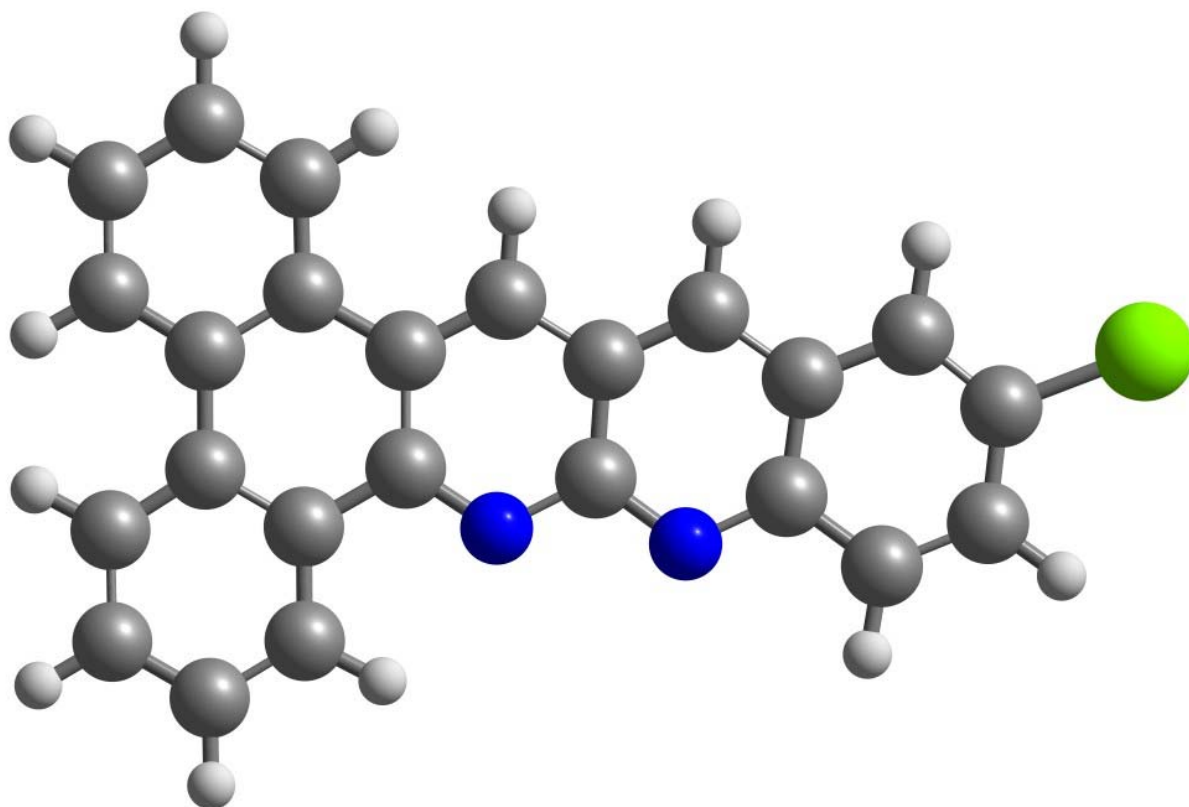**5d**

Charge 0; Multiplicity 1

|    |              |              |              |
|----|--------------|--------------|--------------|
| 6  | -5.805217000 | 1.099598000  | 0.000000000  |
| 6  | -5.911079000 | -0.291829000 | 0.000000000  |
| 6  | -4.536970000 | 1.715719000  | 0.000000000  |
| 6  | -4.760318000 | -1.120143000 | 0.000000000  |
| 6  | -3.483537000 | -0.485512000 | 0.000000000  |
| 6  | -3.389472000 | 0.926613000  | 0.000000000  |
| 6  | -2.258632000 | -1.286694000 | 0.000000000  |
| 6  | -2.344810000 | -2.737631000 | 0.000000000  |
| 6  | -4.851875000 | -2.591074000 | 0.000000000  |
| 6  | -3.662711000 | -3.387648000 | 0.000000000  |
| 6  | -3.784575000 | -4.799954000 | 0.000000000  |
| 6  | -6.105080000 | -3.253656000 | 0.000000000  |
| 6  | -6.200008000 | -4.644274000 | 0.000000000  |
| 6  | -5.029214000 | -5.426092000 | 0.000000000  |
| 7  | -1.090925000 | -0.616646000 | 0.000000000  |
| 6  | 0.091395000  | -1.311498000 | 0.000000000  |
| 6  | -1.144397000 | -3.442035000 | 0.000000000  |
| 6  | 0.103726000  | -2.765216000 | 0.000000000  |
| 7  | 1.236153000  | -0.571360000 | 0.000000000  |
| 6  | 2.427565000  | -1.231091000 | 0.000000000  |
| 6  | 2.536431000  | -2.683788000 | 0.000000000  |
| 6  | 1.345765000  | -3.428667000 | 0.000000000  |
| 6  | 3.629820000  | -0.454389000 | 0.000000000  |
| 6  | 4.867719000  | -1.063414000 | 0.000000000  |
| 6  | 4.953433000  | -2.488504000 | 0.000000000  |
| 6  | 3.835113000  | -3.289110000 | 0.000000000  |
| 1  | 5.782087000  | -0.473622000 | -0.000001000 |
| 35 | 6.728717000  | -3.302825000 | -0.000001000 |
| 1  | 3.521709000  | 0.629277000  | 0.000000000  |
| 1  | 3.922809000  | -4.375528000 | 0.000000000  |
| 1  | 1.382252000  | -4.521460000 | 0.000000000  |
| 1  | -1.131902000 | -4.532996000 | 0.000000000  |
| 1  | -2.390818000 | 1.359872000  | 0.000000000  |
| 1  | -4.454195000 | 2.803087000  | 0.000000000  |
| 1  | -6.710055000 | 1.708223000  | 0.000000000  |
| 1  | -6.903959000 | -0.736584000 | 0.000000000  |
| 1  | -7.023872000 | -2.670140000 | 0.000000000  |
| 1  | -7.180035000 | -5.122138000 | 0.000000000  |
| 1  | -2.889357000 | -5.419963000 | 0.000000000  |
| 1  | -5.093042000 | -6.514728000 | 0.000000000  |

## SUPPORTING INFORMATION

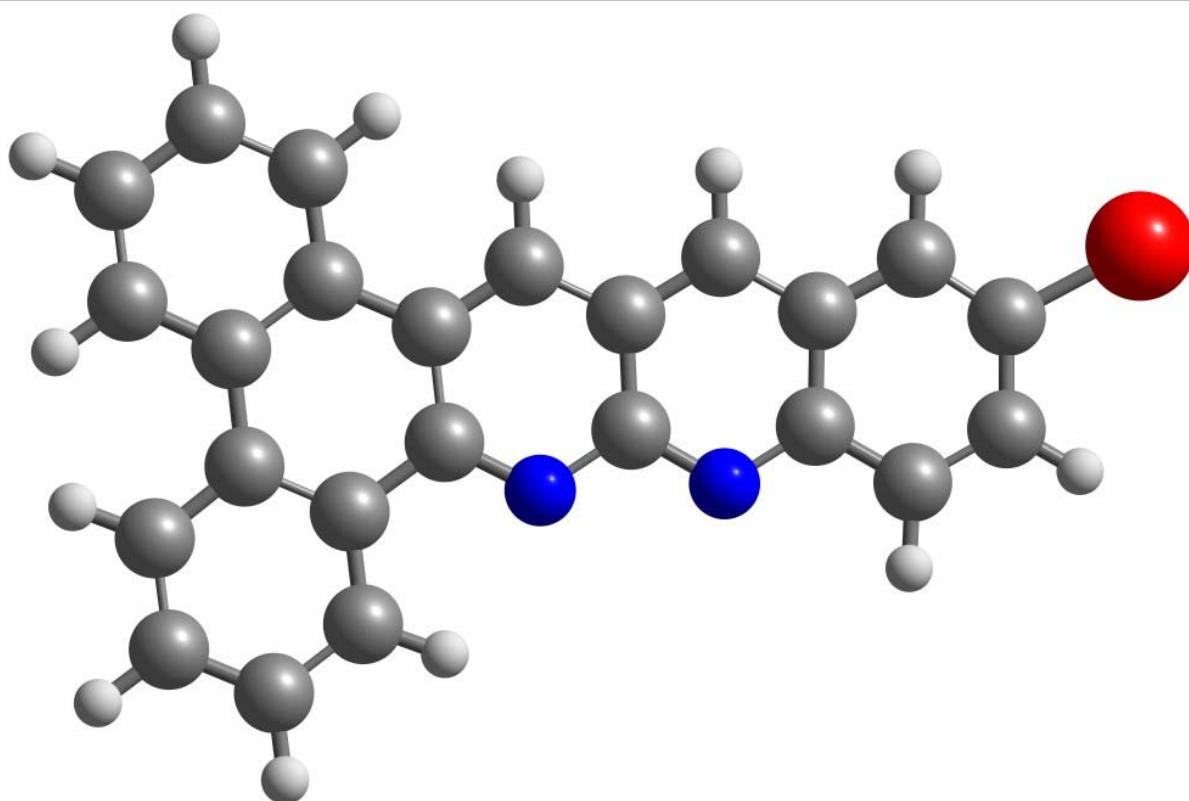

5e  
Charge 0; Multiplicity 1

|   |              |              |              |
|---|--------------|--------------|--------------|
| 6 | -5.789395000 | 1.115602000  | -0.000001000 |
| 6 | -5.906381000 | -0.274957000 | -0.000001000 |
| 6 | -4.515817000 | 1.720511000  | 0.000000000  |
| 6 | -4.762425000 | -1.112846000 | 0.000000000  |
| 6 | -3.480427000 | -0.489599000 | 0.000000000  |
| 6 | -3.375017000 | 0.921427000  | 0.000000000  |
| 6 | -2.261262000 | -1.301416000 | 0.000001000  |
| 6 | -2.359549000 | -2.751207000 | 0.000001000  |
| 6 | -4.866251000 | -2.583278000 | 0.000000000  |
| 6 | -3.683732000 | -3.389632000 | 0.000000000  |
| 6 | -3.818282000 | -4.800749000 | 0.000001000  |
| 6 | -6.125040000 | -3.235186000 | -0.000001000 |
| 6 | -6.232400000 | -4.624975000 | -0.000001000 |
| 6 | -5.068278000 | -5.416504000 | 0.000000000  |
| 7 | -1.088566000 | -0.641776000 | 0.000001000  |
| 6 | 0.088770000  | -1.347370000 | 0.000001000  |
| 6 | -1.165641000 | -3.466139000 | 0.000001000  |
| 6 | 0.089984000  | -2.801757000 | 0.000001000  |
| 7 | 1.239410000  | -0.618582000 | 0.000002000  |
| 6 | 2.425176000  | -1.289826000 | 0.000001000  |
| 6 | 2.527235000  | -2.745585000 | 0.000001000  |
| 6 | 1.324599000  | -3.476527000 | 0.000001000  |
| 6 | 3.632517000  | -0.524205000 | 0.000001000  |
| 6 | 4.868278000  | -1.139472000 | 0.000000000  |
| 6 | 4.957993000  | -2.570475000 | 0.000000000  |
| 6 | 3.815774000  | -3.353784000 | 0.000000000  |
| 1 | 5.772189000  | -0.533531000 | 0.000000000  |
| 8 | 6.176215000  | -3.260371000 | -0.000001000 |
| 1 | 3.530440000  | 0.560249000  | 0.000001000  |
| 1 | 3.917661000  | -4.439291000 | 0.000000000  |
| 1 | 1.349361000  | -4.569696000 | 0.000001000  |
| 1 | -1.163455000 | -4.557305000 | 0.000001000  |
| 1 | -2.372543000 | 1.345969000  | 0.000001000  |
| 1 | -4.423245000 | 2.807211000  | 0.000000000  |
| 1 | -6.689251000 | 1.731669000  | -0.000002000 |
| 1 | -6.902800000 | -0.711890000 | -0.000002000 |
| 1 | -7.038638000 | -2.643393000 | -0.000001000 |
| 1 | -7.216679000 | -5.094187000 | -0.000001000 |
| 1 | -2.928237000 | -5.428174000 | 0.000001000  |
| 1 | -5.140993000 | -6.504681000 | 0.000000000  |
| 6 | 7.416368000  | -2.482986000 | -0.000002000 |
| 1 | 8.211781000  | -3.232502000 | -0.000003000 |
| 1 | 7.496522000  | -1.857067000 | 0.902083000  |
| 1 | 7.496520000  | -1.857066000 | -0.902086000 |

## SUPPORTING INFORMATION

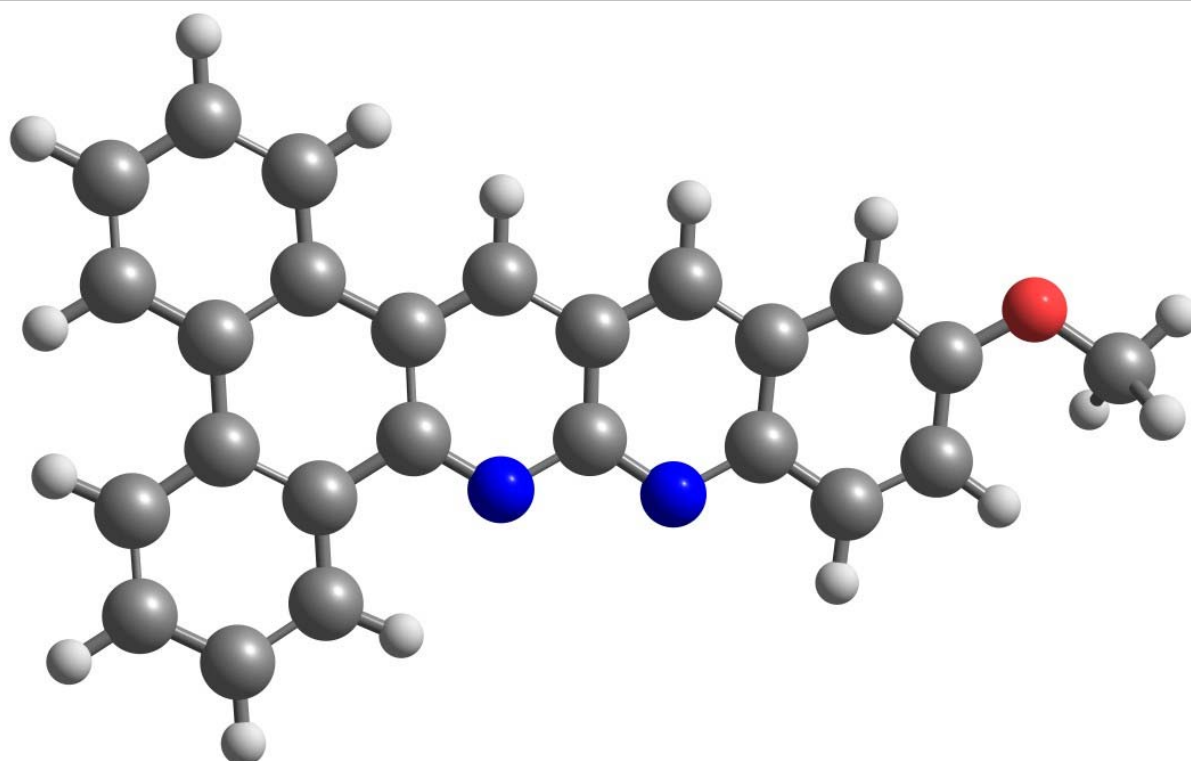

5f

Charge 0; Multiplicity 1

|   |              |              |              |
|---|--------------|--------------|--------------|
| 6 | -5.852003000 | 1.122309000  | 0.033457000  |
| 6 | -5.969524000 | -0.268431000 | 0.029546000  |
| 6 | -4.579033000 | 1.728107000  | 0.027463000  |
| 6 | -4.825897000 | -1.105876000 | 0.019509000  |
| 6 | -3.544167000 | -0.481644000 | 0.013713000  |
| 6 | -3.438047000 | 0.929520000  | 0.017706000  |
| 6 | -2.326037000 | -1.292697000 | 0.003830000  |
| 6 | -2.424191000 | -2.744271000 | -0.000134000 |
| 6 | -4.929605000 | -2.576261000 | 0.014903000  |
| 6 | -3.747509000 | -3.382987000 | 0.005144000  |
| 6 | -3.881049000 | -4.794159000 | 0.000624000  |
| 6 | -6.188137000 | -3.228058000 | 0.019834000  |
| 6 | -6.294797000 | -4.617926000 | 0.015342000  |
| 6 | -5.130960000 | -5.409770000 | 0.005588000  |
| 7 | -1.153553000 | -0.632541000 | -0.000875000 |
| 6 | 0.023507000  | -1.337263000 | -0.009652000 |
| 6 | -1.230134000 | -3.458332000 | -0.008802000 |
| 6 | 0.024196000  | -2.792018000 | -0.013711000 |
| 7 | 1.172217000  | -0.606296000 | -0.014138000 |
| 6 | 2.359124000  | -1.277852000 | -0.022587000 |
| 6 | 2.458082000  | -2.730050000 | -0.026904000 |
| 6 | 1.260340000  | -3.464543000 | -0.022286000 |
| 6 | 3.559259000  | -0.505410000 | -0.027374000 |
| 6 | 4.792812000  | -1.131916000 | -0.035810000 |
| 6 | 4.897284000  | -2.560658000 | -0.040015000 |
| 6 | 3.755985000  | -3.334368000 | -0.035609000 |
| 6 | 6.026049000  | -0.288120000 | -0.041132000 |
| 1 | 3.456536000  | 0.578500000  | -0.024030000 |
| 1 | 3.831536000  | -4.423418000 | -0.038752000 |
| 1 | 1.288414000  | -4.557620000 | -0.025358000 |
| 1 | -1.227207000 | -4.549260000 | -0.011958000 |
| 1 | -2.436300000 | 1.355436000  | 0.012930000  |
| 1 | -4.486978000 | 2.814604000  | 0.030540000  |
| 1 | -6.751821000 | 1.738122000  | 0.041227000  |
| 1 | -6.965990000 | -0.704810000 | 0.034529000  |
| 1 | -7.101864000 | -2.636797000 | 0.027255000  |
| 1 | -7.278878000 | -5.087205000 | 0.019349000  |
| 1 | -2.991428000 | -5.422113000 | -0.007079000 |
| 1 | -5.204002000 | -6.497736000 | 0.001818000  |
| 1 | 5.882801000  | -3.020584000 | -0.046651000 |
| 9 | 6.093814000  | 0.565540000  | -1.169980000 |
| 9 | 6.103603000  | 0.565644000  | 1.086904000  |
| 9 | 7.213281000  | -1.052665000 | -0.046302000 |

## SUPPORTING INFORMATION

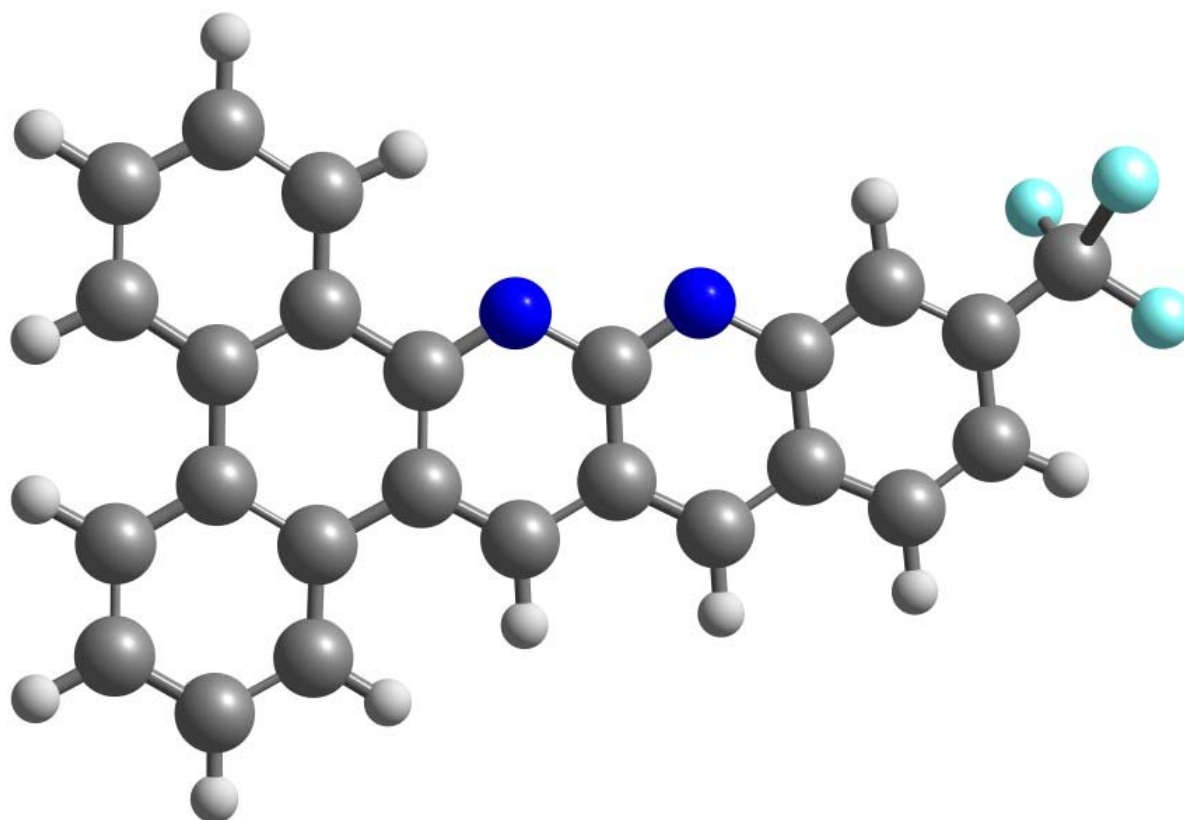

5g

Charge 0; Multiplicity 1

|   |              |              |              |
|---|--------------|--------------|--------------|
| 6 | -5.939369000 | 1.109949000  | 0.010574000  |
| 6 | -6.003852000 | -0.283710000 | 0.013396000  |
| 6 | -4.689550000 | 1.763017000  | 0.003758000  |
| 6 | -4.828804000 | -1.077965000 | 0.009527000  |
| 6 | -3.571015000 | -0.406143000 | 0.002735000  |
| 6 | -3.519354000 | 1.008200000  | -0.000087000 |
| 6 | -2.323626000 | -1.171433000 | -0.001378000 |
| 6 | -2.365728000 | -2.619924000 | 0.001517000  |
| 6 | -4.876026000 | -2.550393000 | 0.012315000  |
| 6 | -3.662715000 | -3.310104000 | 0.008366000  |
| 6 | -3.741435000 | -4.725643000 | 0.011136000  |
| 6 | -6.108437000 | -3.251571000 | 0.018909000  |
| 6 | -6.160632000 | -4.644305000 | 0.021526000  |
| 6 | -4.966112000 | -5.389699000 | 0.017602000  |
| 7 | -1.173282000 | -0.465484000 | -0.007758000 |
| 6 | 0.024056000  | -1.126914000 | -0.011752000 |
| 6 | -1.141674000 | -3.289029000 | -0.002418000 |
| 6 | 0.081261000  | -2.574467000 | -0.009116000 |
| 7 | 1.153970000  | -0.356926000 | -0.018344000 |
| 6 | 2.361128000  | -0.966646000 | -0.022507000 |
| 6 | 2.514322000  | -2.412095000 | -0.020197000 |
| 6 | 1.352608000  | -3.191286000 | -0.013412000 |
| 6 | 3.553508000  | -0.126009000 | -0.029661000 |
| 6 | 4.846559000  | -0.741600000 | -0.034321000 |
| 6 | 4.950607000  | -2.183670000 | -0.031792000 |
| 6 | 3.839160000  | -2.982520000 | -0.024990000 |
| 1 | 3.935608000  | -4.070500000 | -0.023079000 |
| 1 | 1.427181000  | -4.282460000 | -0.011470000 |
| 1 | -1.096220000 | -4.379178000 | -0.000431000 |
| 1 | -2.534040000 | 1.470872000  | -0.005349000 |
| 1 | -4.638771000 | 2.852414000  | 0.001508000  |
| 1 | -6.861805000 | 1.691715000  | 0.013682000  |
| 1 | -6.983373000 | -0.757641000 | 0.018754000  |
| 1 | -7.044850000 | -2.696885000 | 0.022086000  |
| 1 | -7.125553000 | -5.152006000 | 0.026651000  |
| 1 | -2.827226000 | -5.317156000 | 0.008154000  |
| 1 | -4.996147000 | -6.479834000 | 0.019613000  |
| 1 | 5.947927000  | -2.627699000 | -0.035473000 |
| 6 | 5.998766000  | 0.085839000  | -0.041309000 |
| 6 | 3.451036000  | 1.284850000  | -0.032086000 |
| 6 | 5.878790000  | 1.474820000  | -0.043613000 |
| 6 | 4.598944000  | 2.076228000  | -0.038989000 |
| 1 | 2.452218000  | 1.718619000  | -0.028391000 |
| 1 | 4.509723000  | 3.163334000  | -0.040860000 |
| 1 | 6.984896000  | -0.382348000 | -0.044913000 |

## SUPPORTING INFORMATION

1 6.773372000 2.098395000 -0.049021000

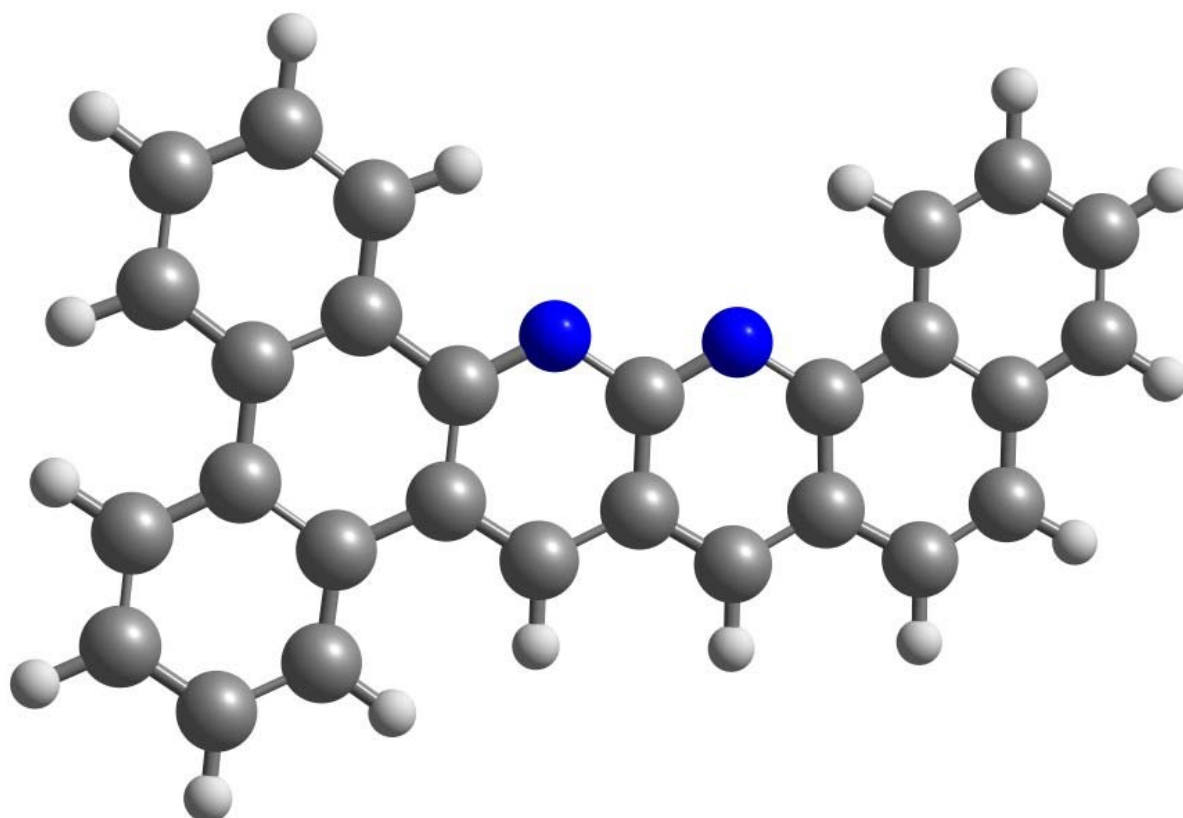

5h

Charge 0; Multiplicity 1

|   |              |              |              |
|---|--------------|--------------|--------------|
| 6 | -4.437789000 | 2.460871000  | -0.070205000 |
| 6 | -4.368192000 | 1.051173000  | -0.037228000 |
| 6 | -3.269524000 | 3.222909000  | -0.065368000 |
| 6 | -1.991937000 | 2.611027000  | -0.027837000 |
| 6 | -3.125258000 | 0.423309000  | 0.000007000  |
| 6 | -1.924274000 | 1.178011000  | 0.005306000  |
| 6 | -0.744626000 | 3.378664000  | -0.021219000 |
| 6 | 0.526721000  | 2.669312000  | 0.018394000  |
| 6 | -0.637017000 | 0.520683000  | 0.043854000  |
| 6 | 0.531886000  | 1.229406000  | 0.050128000  |
| 7 | 1.733519000  | 3.289041000  | 0.027836000  |
| 6 | -0.691197000 | 4.772996000  | -0.050759000 |
| 6 | 1.768997000  | 4.656134000  | -0.001483000 |
| 6 | 0.552301000  | 5.448750000  | -0.041918000 |
| 7 | 3.008490000  | 5.238561000  | 0.009119000  |
| 6 | 3.100945000  | 6.585530000  | -0.019301000 |
| 6 | 0.674467000  | 6.857494000  | -0.070987000 |
| 6 | 1.936570000  | 7.456869000  | -0.060635000 |
| 6 | 4.433143000  | 7.181513000  | -0.008057000 |
| 6 | 4.564400000  | 8.607162000  | -0.038636000 |
| 6 | 2.123393000  | 8.887142000  | -0.089757000 |
| 6 | 3.378041000  | 9.433879000  | -0.079323000 |
| 6 | 5.593226000  | 6.373462000  | 0.031877000  |
| 6 | 6.860061000  | 6.956639000  | 0.041436000  |
| 6 | 5.863845000  | 9.175857000  | -0.028436000 |
| 6 | 6.996401000  | 8.363531000  | 0.011101000  |
| 1 | -5.283110000 | 0.458499000  | -0.040861000 |
| 1 | -3.058080000 | -0.666261000 | 0.025988000  |
| 1 | -5.407950000 | 2.957855000  | -0.099681000 |
| 1 | -3.351160000 | 4.309987000  | -0.091148000 |
| 1 | -0.620844000 | -0.571081000 | 0.068406000  |
| 1 | 1.508926000  | 0.749953000  | 0.079167000  |
| 1 | -1.604267000 | 5.369541000  | -0.081164000 |
| 1 | -0.224964000 | 7.478133000  | -0.102154000 |
| 1 | 1.237616000  | 9.524492000  | -0.120875000 |
| 1 | 3.507860000  | 10.517970000 | -0.101950000 |
| 1 | 5.454901000  | 5.293184000  | 0.054379000  |
| 1 | 7.748842000  | 6.325987000  | 0.072397000  |
| 1 | 5.965249000  | 10.262988000 | -0.052459000 |
| 1 | 7.989591000  | 8.814267000  | 0.018584000  |



## SUPPORTING INFORMATION

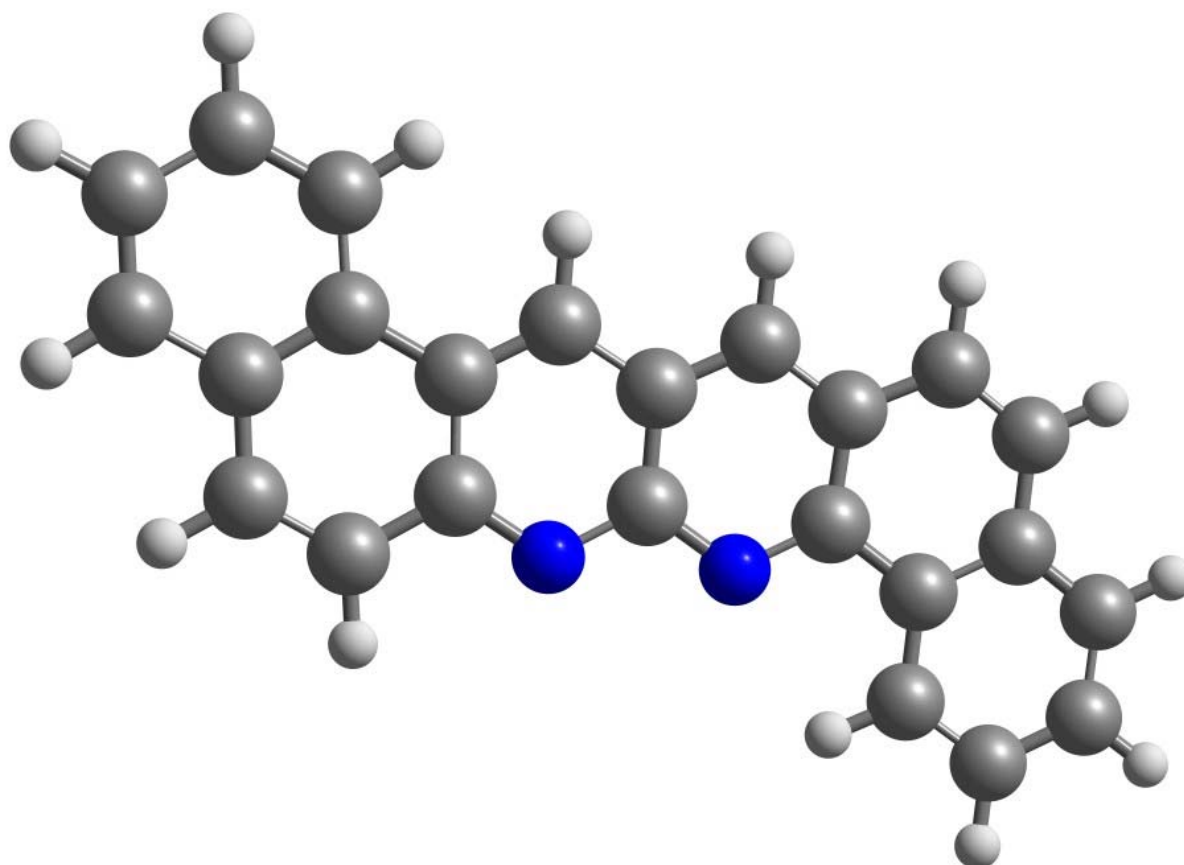**11a**

Charge 0; Multiplicity 1

|   |              |              |              |
|---|--------------|--------------|--------------|
| 6 | 0.625272000  | 0.823730000  | -0.041907000 |
| 6 | 0.526912000  | -0.603510000 | 0.032298000  |
| 6 | 1.857846000  | 1.444938000  | -0.074499000 |
| 6 | 3.062987000  | 0.674184000  | -0.034601000 |
| 6 | 1.664684000  | -1.384071000 | 0.071438000  |
| 6 | 2.963710000  | -0.778531000 | 0.038975000  |
| 7 | 4.253324000  | 1.339547000  | -0.065949000 |
| 6 | 5.401000000  | 0.607225000  | -0.026950000 |
| 6 | 4.159495000  | -1.513600000 | 0.074922000  |
| 6 | 5.398861000  | -0.845125000 | 0.041944000  |
| 7 | 6.580837000  | 1.308828000  | -0.052490000 |
| 6 | 7.751305000  | 0.645805000  | -0.016272000 |
| 6 | 7.846647000  | -0.803392000 | 0.044463000  |
| 6 | 6.650674000  | -1.514156000 | 0.074662000  |
| 1 | -0.287692000 | 1.419002000  | -0.072369000 |
| 1 | 1.967883000  | 2.527179000  | -0.130258000 |
| 1 | -0.458193000 | -1.070236000 | 0.057859000  |
| 1 | 1.593257000  | -2.472524000 | 0.128410000  |
| 1 | 4.129965000  | -2.605595000 | 0.128863000  |
| 1 | 6.646002000  | -2.604234000 | 0.127168000  |
| 6 | 9.169790000  | -1.442155000 | 0.076373000  |
| 6 | 8.972437000  | 1.455656000  | -0.035312000 |
| 6 | 10.343839000 | -0.624700000 | 0.060638000  |
| 6 | 10.245344000 | 0.822915000  | 0.004899000  |
| 6 | 11.419393000 | 1.640373000  | -0.010786000 |
| 6 | 12.742533000 | 1.001628000  | 0.021629000  |
| 6 | 11.616748000 | -1.257456000 | 0.100520000  |
| 6 | 12.837877000 | -0.447591000 | 0.081887000  |
| 7 | 14.008342000 | -1.110615000 | 0.118148000  |
| 6 | 15.188177000 | -0.408987000 | 0.093308000  |
| 6 | 15.190318000 | 1.043403000  | 0.025270000  |
| 6 | 13.938508000 | 1.712428000  | -0.007646000 |
| 6 | 8.872149000  | 2.859224000  | -0.087978000 |
| 6 | 10.013871000 | 3.671947000  | -0.097680000 |
| 6 | 11.271911000 | 3.039904000  | -0.058155000 |
| 6 | 9.317269000  | -2.841709000 | 0.123152000  |
| 6 | 10.575318000 | -3.473775000 | 0.161991000  |
| 6 | 11.717041000 | -2.661048000 | 0.152515000  |
| 1 | 8.423975000  | -3.465750000 | 0.128253000  |
| 1 | 12.722131000 | -3.073264000 | 0.182107000  |
| 1 | 7.867065000  | 3.271434000  | -0.117897000 |
| 1 | 12.165210000 | 3.663950000  | -0.063298000 |
| 1 | 13.943187000 | 2.802538000  | -0.059510000 |



## SUPPORTING INFORMATION

|   |              |              |              |
|---|--------------|--------------|--------------|
| 6 | 16.429685000 | 1.711923000  | -0.006764000 |
| 7 | 16.335851000 | -1.141315000 | 0.132233000  |
| 6 | 17.526188000 | -0.475913000 | 0.101746000  |
| 6 | 17.625469000 | 0.976853000  | 0.029193000  |
| 1 | 16.459218000 | 2.803954000  | -0.060008000 |
| 6 | 18.924496000 | 1.582439000  | -0.002329000 |
| 6 | 18.731328000 | -1.246674000 | 0.141562000  |
| 6 | 19.963904000 | -0.625422000 | 0.109884000  |
| 6 | 20.062267000 | 0.801871000  | 0.036724000  |
| 1 | 18.621287000 | -2.328956000 | 0.196525000  |
| 1 | 20.876865000 | -1.220700000 | 0.140284000  |
| 1 | 18.995928000 | 2.670934000  | -0.058509000 |
| 1 | 21.047374000 | 1.268633000  | 0.011893000  |
| 6 | 10.655902000 | -5.012312000 | 0.195586000  |
| 6 | 9.853442000  | -5.551164000 | 1.411169000  |
| 1 | 10.258736000 | -5.150458000 | 2.351781000  |
| 1 | 9.916347000  | -6.650166000 | 1.445145000  |
| 1 | 8.790632000  | -5.275598000 | 1.351288000  |
| 6 | 10.045528000 | -5.578511000 | -1.116986000 |
| 1 | 8.992392000  | -5.282930000 | -1.233344000 |
| 1 | 10.094710000 | -6.678655000 | -1.111616000 |
| 1 | 10.601134000 | -5.208646000 | -1.991144000 |
| 6 | 12.113989000 | -5.509514000 | 0.314631000  |
| 1 | 12.723326000 | -5.195940000 | -0.546142000 |
| 1 | 12.125046000 | -6.609585000 | 0.352105000  |
| 1 | 12.593264000 | -5.133409000 | 1.230323000  |
| 6 | 9.933324000  | 5.210451000  | -0.132752000 |
| 6 | 10.734736000 | 5.747757000  | -1.349752000 |
| 1 | 11.797592000 | 5.472251000  | -1.290354000 |
| 1 | 10.671753000 | 6.846709000  | -1.385173000 |
| 1 | 10.328683000 | 5.345753000  | -2.289479000 |
| 6 | 10.544954000 | 5.778174000  | 1.178546000  |
| 1 | 11.598204000 | 5.482749000  | 1.294272000  |
| 1 | 9.990174000  | 5.409370000  | 2.053676000  |
| 1 | 10.495824000 | 6.878313000  | 1.171902000  |
| 6 | 8.475170000  | 5.707615000  | -0.251025000 |
| 1 | 7.995208000  | 5.331024000  | -1.166157000 |
| 1 | 8.464127000  | 6.807662000  | -0.289135000 |
| 1 | 7.866442000  | 5.394541000  | 0.610363000  |

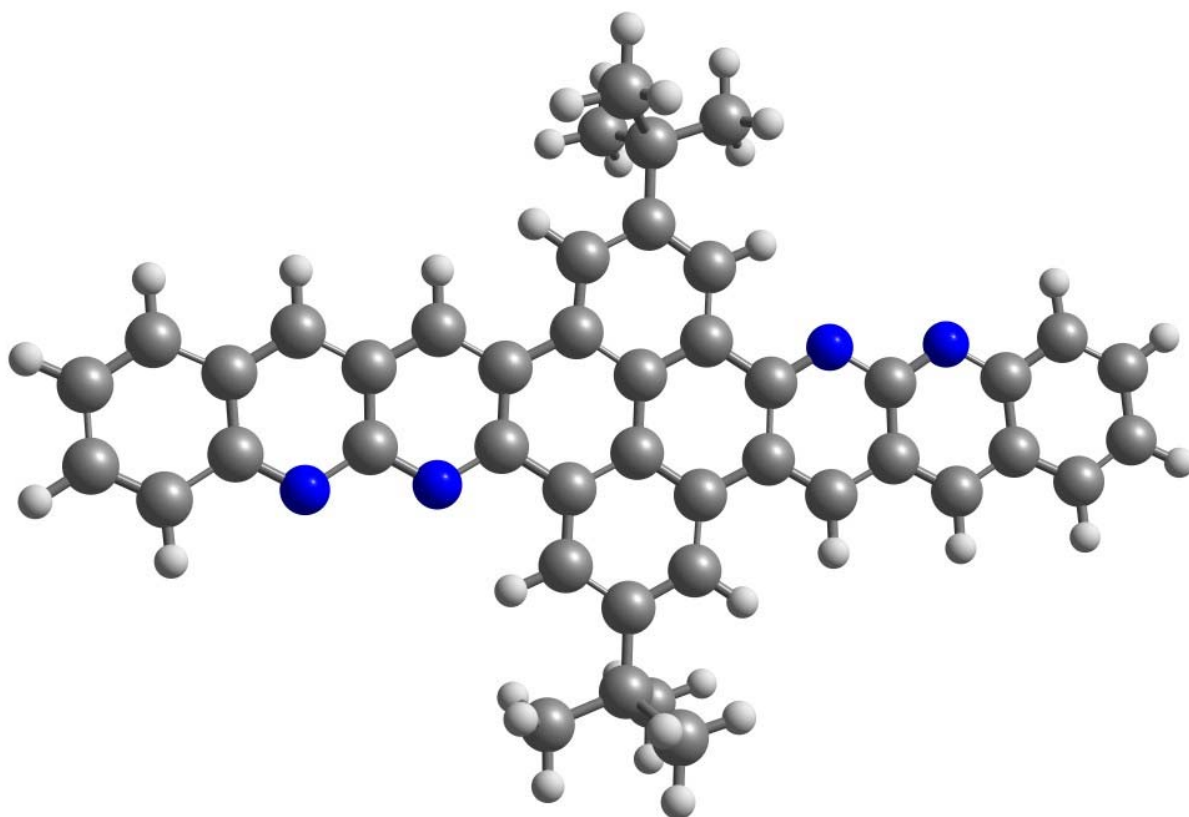**11b**

| Charge 0; Multiplicity 1 |              |              |             |
|--------------------------|--------------|--------------|-------------|
| 6                        | -0.270864000 | 0.739151000  | 0.045086000 |
| 6                        | -0.317064000 | -0.697712000 | 0.076578000 |
| 6                        | 0.967371000  | 1.365690000  | 0.028960000 |
| 6                        | 2.186395000  | 0.625582000  | 0.043513000 |
| 6                        | 0.836826000  | -1.455371000 | 0.091286000 |
| 6                        | 2.123541000  | -0.829936000 | 0.075603000 |

## SUPPORTING INFORMATION

|   |              |              |              |
|---|--------------|--------------|--------------|
| 7 | 3.363064000  | 1.319585000  | 0.026489000  |
| 6 | 4.525943000  | 0.612385000  | 0.040507000  |
| 6 | 3.334520000  | -1.539320000 | 0.089352000  |
| 6 | 4.558128000  | -0.841942000 | 0.072171000  |
| 7 | 5.690796000  | 1.340305000  | 0.022750000  |
| 6 | 6.875776000  | 0.702964000  | 0.034799000  |
| 6 | 7.004539000  | -0.744461000 | 0.066140000  |
| 6 | 5.824886000  | -1.482454000 | 0.084295000  |
| 1 | 1.058433000  | 2.452519000  | 0.004504000  |
| 1 | -1.283893000 | -1.198535000 | 0.088612000  |
| 1 | 0.781350000  | -2.546211000 | 0.115224000  |
| 1 | 3.329812000  | -2.632903000 | 0.113309000  |
| 1 | 5.845518000  | -2.573539000 | 0.107778000  |
| 6 | 8.342018000  | -1.353650000 | 0.076922000  |
| 6 | 8.078704000  | 1.540201000  | 0.013360000  |
| 6 | 9.497413000  | -0.510066000 | 0.054003000  |
| 6 | 9.365835000  | 0.935709000  | 0.021933000  |
| 6 | 10.521230000 | 1.779293000  | -0.000981000 |
| 6 | 11.858709000 | 1.170107000  | 0.009894000  |
| 6 | 10.784544000 | -1.114558000 | 0.062556000  |
| 6 | 11.987472000 | -0.277319000 | 0.041190000  |
| 7 | 13.172451000 | -0.914659000 | 0.053302000  |
| 6 | 14.337305000 | -0.186736000 | 0.035710000  |
| 6 | 14.305121000 | 1.267594000  | 0.004159000  |
| 6 | 13.038363000 | 1.908104000  | -0.008085000 |
| 6 | 7.946132000  | 2.941705000  | -0.016599000 |
| 6 | 9.069206000  | 3.779646000  | -0.040196000 |
| 6 | 10.341517000 | 3.175548000  | -0.032389000 |
| 6 | 8.521731000  | -2.749906000 | 0.108270000  |
| 6 | 9.794042000  | -3.354005000 | 0.116032000  |
| 6 | 10.917116000 | -2.516063000 | 0.092461000  |
| 1 | 7.643195000  | -3.394186000 | 0.124843000  |
| 1 | 11.932026000 | -2.904638000 | 0.096125000  |
| 1 | 6.931221000  | 3.330279000  | -0.020268000 |
| 1 | 11.220053000 | 3.819827000  | -0.048987000 |
| 1 | 13.017729000 | 2.999190000  | -0.031487000 |
| 6 | 15.528732000 | 1.964976000  | -0.012758000 |
| 7 | 15.500183000 | -0.893935000 | 0.049811000  |
| 6 | 16.676852000 | -0.199929000 | 0.033052000  |
| 6 | 16.739710000 | 1.255592000  | 0.001142000  |
| 1 | 15.533443000 | 3.058561000  | -0.036608000 |
| 6 | 18.026430000 | 1.881032000  | -0.014202000 |
| 6 | 17.895874000 | -0.940034000 | 0.047741000  |
| 6 | 19.134112000 | -0.313492000 | 0.031992000  |
| 6 | 19.180318000 | 1.123375000  | 0.000684000  |
| 1 | 17.804808000 | -2.026868000 | 0.072038000  |
| 1 | 18.081906000 | 2.971875000  | -0.038014000 |
| 1 | 20.147151000 | 1.624197000  | -0.011085000 |
| 6 | 9.909530000  | -4.889916000 | 0.167441000  |
| 6 | 9.311701000  | -5.396710000 | 1.509693000  |
| 1 | 9.857767000  | -4.965626000 | 2.361485000  |
| 1 | 9.388072000  | -6.494005000 | 1.566238000  |
| 1 | 8.251592000  | -5.120755000 | 1.610589000  |
| 6 | 9.122558000  | -5.514204000 | -1.016528000 |
| 1 | 8.053370000  | -5.260677000 | -0.973823000 |
| 1 | 9.211100000  | -6.611740000 | -0.988845000 |
| 1 | 9.520989000  | -5.157225000 | -1.977598000 |
| 6 | 11.379250000 | -5.358444000 | 0.076653000  |
| 1 | 11.852655000 | -5.017136000 | -0.855696000 |
| 1 | 11.416778000 | -6.458530000 | 0.095224000  |
| 1 | 11.976765000 | -4.986549000 | 0.922021000  |
| 6 | 8.953718000  | 5.315555000  | -0.091678000 |
| 6 | 9.551617000  | 5.822295000  | -1.433917000 |
| 1 | 10.611737000 | 5.546356000  | -1.534744000 |
| 1 | 9.475232000  | 6.919587000  | -1.490514000 |
| 1 | 9.005607000  | 5.391167000  | -2.285722000 |
| 6 | 9.740627000  | 5.939892000  | 1.092308000  |
| 1 | 10.809819000 | 5.686371000  | 1.049653000  |
| 1 | 9.342159000  | 5.582937000  | 2.053372000  |
| 1 | 9.652076000  | 7.037426000  | 1.064587000  |
| 6 | 7.483992000  | 5.784084000  | -0.000989000 |
| 1 | 6.886520000  | 5.412137000  | -0.846363000 |
| 1 | 7.446463000  | 6.884169000  | -0.019627000 |
| 1 | 7.010542000  | 5.442831000  | 0.931357000  |
| 6 | -1.541144000 | 1.579966000  | 0.030424000  |
| 6 | -2.873763000 | 0.813052000  | 0.023631000  |
| 1 | -1.510116000 | 2.244648000  | -0.852221000 |
| 1 | -1.524733000 | 2.254178000  | 0.906455000  |
| 6 | -4.094074000 | 1.750341000  | -0.004094000 |
| 1 | -2.938883000 | 0.166706000  | 0.917277000  |
| 1 | -2.915625000 | 0.143002000  | -0.853920000 |
| 6 | -5.437305000 | 0.996870000  | -0.008623000 |
| 1 | -4.037583000 | 2.400149000  | -0.897236000 |
| 1 | -4.058287000 | 2.426431000  | 0.870622000  |
| 6 | -6.653695000 | 1.936696000  | -0.035883000 |
| 1 | -5.489372000 | 0.347346000  | 0.883672000  |

## SUPPORTING INFORMATION

|   |              |              |              |
|---|--------------|--------------|--------------|
| 1 | -5.469038000 | 0.321615000  | -0.882742000 |
| 6 | 20.404385000 | -1.154312000 | 0.046961000  |
| 6 | 21.737017000 | -0.387418000 | 0.053112000  |
| 1 | 20.387817000 | -1.829054000 | -0.828655000 |
| 1 | 20.373488000 | -1.818457000 | 0.930018000  |
| 6 | 22.957312000 | -1.324732000 | 0.080856000  |
| 1 | 21.779148000 | 0.282918000  | 0.930433000  |
| 1 | 21.801892000 | 0.258635000  | -0.840761000 |
| 6 | 24.300567000 | -0.571302000 | 0.084857000  |
| 1 | 22.921312000 | -2.001107000 | -0.793631000 |
| 1 | 22.900995000 | -1.974244000 | 0.974224000  |
| 6 | 25.516929000 | -1.511159000 | 0.112404000  |
| 1 | 24.332433000 | 0.104358000  | 0.958660000  |
| 1 | 24.352546000 | 0.077806000  | -0.807744000 |
| 1 | 25.503781000 | -2.149073000 | 1.010661000  |
| 1 | 26.462579000 | -0.949092000 | 0.114472000  |
| 1 | 25.523416000 | -2.175626000 | -0.766584000 |
| 1 | -6.660393000 | 2.600658000  | 0.843483000  |
| 1 | -7.599325000 | 1.374598000  | -0.038479000 |
| 1 | -6.640384000 | 2.575134000  | -0.933769000 |

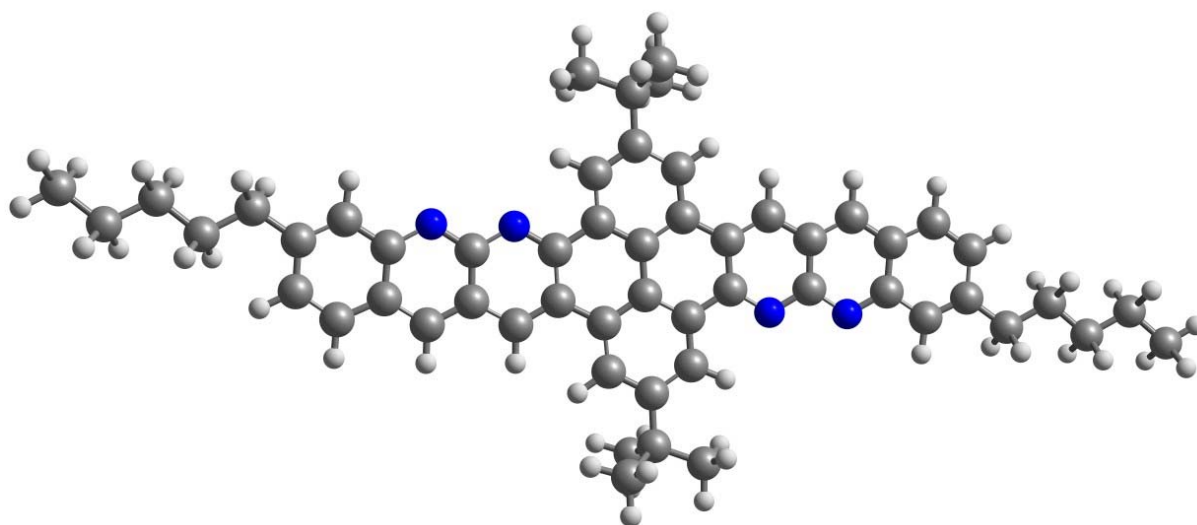

## 8. References

- [1] C. M. Cardona, W. Li, A. E. Kaifer, D. Stockdale, G. C. Bazan, *Adv. Mater.* **2011**, *23*, 2367-2371.
- [2] B. R. Rosen, J. C. Ruble, T. J. Beauchamp, A. Navarro, *Org. Lett.* **2011**, *13*, 2564-2567.
- [3] T. W. Liwosz, S. R. Chemler, *Chem. Eur. J.* **2013**, *19*, 12771-12777.
- [4] Z.-H. Wu, Z.-T. Huang, R.-X. Guo, C.-L. Sun, L.-C. Chen, B. Sun, Z.-F. Shi, X. Shao, H. Li, H.-L. Zhang, *Angew. Chem. Int. Ed.* **2017**, *56*, 13031-13035.
- [5] T. Yamato, A. Miyazawa, M. Tashiro, *Chem. Ber.* **1993**, *126*, 2505-2511.
- [6] F. Neese, *An Ab Initio, DFT and Semiempirical electronic structure package* **2009**, *3*.
- [7] P. J. Stephens, F. J. Devlin, C. F. Chabalowski, M. J. Frisch, *J. Phys. Chem.* **1994**, *98*, 11623-11627.
- [8] R. Krishnan, J. S. Binkley, R. Seeger, J. A. Pople, *J. Chem. Phys.* **1980**, *72*, 650-654.
